# Supplementary material
Source: publisher figshare collection journal article supplement (https://acs.figshare.com/ndownloader/files/27997548)

# Supporting Information

## **Pd-catalyzed Enantioselective Dicarbofunctionalization of Alkene to Access Disubstituted Dihydroisoquinolinone**

Qiaoyu Chen,<sup>†</sup> Sanliang Li,<sup>†</sup> Xiaoxiao Xie, Hao Guo,<sup>\*</sup> Junfeng

Yang,<sup>\*</sup> and Junliang Zhang<sup>\*</sup>

Department of Chemistry, Fudan University, 2005 Songhu Road, Shanghai, 200438,  
China

### **Contents**

|                                                       |                 |
|-------------------------------------------------------|-----------------|
| <b>1. General information.....</b>                    | <b>S2</b>       |
| <b>2. Optimization of reaction conditions.....</b>    | <b>S3-S5</b>    |
| <b>3. General procedure.....</b>                      | <b>S6-S84</b>   |
| <b>4. Gram scale reaction and transformation.....</b> | <b>S84-S91</b>  |
| <b>5. References.....</b>                             | <b>S92</b>      |
| <b>6. NMR spectra.....</b>                            | <b>S93-S142</b> |

## 1. General Information

All reactions were carried out under an atmosphere of nitrogen in flame-dried sealed tube with magnetic stirring. The  $[\alpha]_D$  was recorded using PolAAr 3005 High Accuracy Polarimeter.  $^1\text{H}$  NMR spectra,  $^{13}\text{C}$  NMR spectra,  $^{19}\text{F}$  NMR spectra and  $^{31}\text{P}$  NMR spectra were recorded on a Bruker 400 MHz spectrometer in  $\text{CDCl}_3$ . All signals are reported in  $\delta$  units, parts per million (ppm), and were referenced to  $\text{CDCl}_3$  ( $\delta$  7.26 ppm for  $^1\text{H}$  NMR and 77.0 ppm for  $^{13}\text{C}$  NMR) as the internal standard. Data for  $^1\text{H}$  NMR spectra are reported as follows: chemical shift (ppm; s = singlet, d = doublet, t = triplet, dd = doublet of doublets, m = multiplet), coupling constant (Hz), and integration. Data for  $^{13}\text{C}$  NMR are reported in terms of chemical shift (ppm) relative to residual solvent peak ( $\text{CDCl}_3$ : 77.0 ppm). HRMS spectra were recorded on GCQTOF 7200 and Bruker McriOTOF11. SAESI-MS spectra were recorded on a Thermo TSQ Quantum Access triplequadrupole mass spectrometer (Thermo Fisher Scientific, Waltham, MA) equipped with a home-made SAESI ion source in positive mode. The instrumentation used for the crystal measurement was D8 VENTURE MetalJet. Reactions were monitored by thin layer chromatography (TLC) using silica gel plates. Toluene and  $\text{CH}_2\text{Cl}_2$  was freshly distilled from  $\text{CaH}_2$ ; THF, mesitylene, xylene and dioxane were freshly distilled from sodium metal prior to use; EtOAc (AR grade), DMF (AR grade),  $\text{CH}_3\text{OH}$  (AR grade) and *n*-hexane (anhydrous) were purchased from Sinopharm. Flash column chromatography was performed on silica gel 60 (particle size 200-400 mesh ASTM, purchased from Yantai, China) and eluted with petroleum ether/dichloromethane or petroleum ether/ethyl acetate. The substrates **1a-1aa**<sup>[1,2]</sup>, **4**<sup>[1]</sup>, **6a-6j**<sup>[1,2]</sup>, **XuPhos**<sup>[3]</sup> and **N-Me-XuPhos**<sup>[3]</sup> were synthesized according to published procedures, the others are commercially available. The spectral data of the substrates were consisted with that reported in the literature. The enantiomeric excesses of the products were determined by chiral stationary phase Shimadzu HPLC using a Chiralpak AD-H, IC, OD-H, OJ-H, OZ-H, IA.

## 2. Optimization of reaction conditions

2.1 Table S1. Screening of the Known Chiral Ligands for Reaction<sup>[a]</sup>

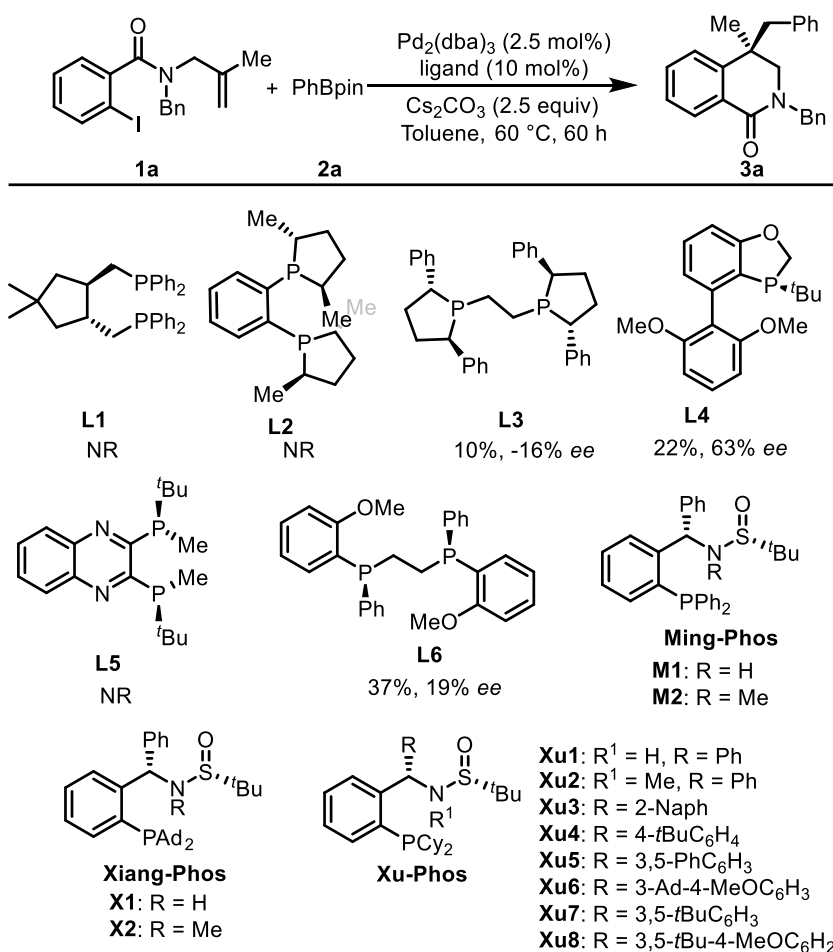

| Entry | ligand     | Yield [%] <sup>[b]</sup> | ee [%] <sup>[c]</sup> |
|-------|------------|--------------------------|-----------------------|
| 1     | <b>M1</b>  | NR                       | -                     |
| 2     | <b>M2</b>  | 43                       | 10                    |
| 3     | <b>X1</b>  | NR                       | -                     |
| 4     | <b>X2</b>  | 56                       | 10                    |
| 5     | <b>Xu1</b> | NR                       | -                     |
| 6     | <b>Xu2</b> | 78                       | 11                    |
| 7     | <b>Xu3</b> | 75                       | 11                    |
| 8     | <b>Xu4</b> | 81                       | 19                    |
| 9     | <b>Xu5</b> | 79                       | 38                    |
| 10    | <b>Xu6</b> | 85                       | 66                    |
| 11    | <b>Xu7</b> | 78                       | 70                    |
| 12    | <b>Xu8</b> | 84                       | 83                    |

[a] The reaction was performed using 0.1 mmol of **1a** and 0.15 mmol of **2a** (0.1 M) for 60 h. [b] Yield determined by HNMR using CH<sub>2</sub>BrCH<sub>2</sub>Br as an internal standard. [c] Determined by HPLC using a chiral stationary phase. NR = no reaction.

## 2.2 Table S2. Screening of Solvents for Reaction<sup>[a]</sup>

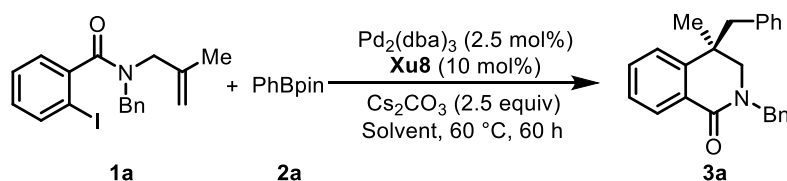

| Entry | Solvent                  | Yield [%] <sup>[b]</sup> | ee [%] <sup>[c]</sup> |
|-------|--------------------------|--------------------------|-----------------------|
| 1     | THF                      | 60                       | 84                    |
| 2     | $\text{CH}_2\text{Cl}_2$ | trace                    | -                     |
| 3     | EtOAc                    | 42                       | 91                    |
| 5     | 1,4-Dioxane              | 15                       | 93                    |
| 6     | DMF                      | NR                       | 11                    |
| 7     | $\text{CH}_3\text{OH}$   | 35                       | 73                    |
| 8     | <i>n</i> -hexane         | 90                       | 80                    |
| 9     | <i>o</i> -xylene         | 82                       | 82                    |
| 10    | <i>m</i> -xylene         | 76                       | 82                    |
| 11    | <i>p</i> -xylene         | 75                       | 81                    |
| 12    | Mesitylene               | 69                       | 77                    |
| 13    | Toluene                  | 84                       | 83                    |

[a] The reaction was performed using 0.1 mmol of **1a** and 0.15 mmol of **2a** (0.1 M) for 60 h. [b] Yield determined by <sup>1</sup>H NMR using  $\text{CH}_2\text{BrCH}_2\text{Br}$  as an internal standard. [c] Determined by HPLC using a chiral stationary phase.

## 2.3 Table S3. Screening of Palladium Salts for Reaction<sup>[a]</sup>

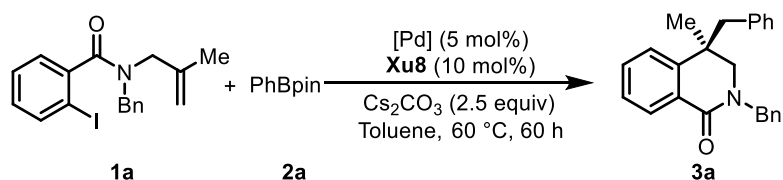

| Entry | [Pd]                                            | Yield [%] <sup>[b]</sup> | ee [%] <sup>[c]</sup> |
|-------|-------------------------------------------------|--------------------------|-----------------------|
| 1     | $\text{Pd}(\text{dba})_2$                       | 81                       | 85                    |
| 2     | $\text{Pd}(\text{dppf})\text{Cl}_2$             | 42                       | 10                    |
| 3     | $\text{Pd}(\text{dppe})\text{Cl}_2$             | 62                       | 30                    |
| 4     | $[\text{Pd}(\text{C}_3\text{H}_5)\text{Cl}]_2$  | 73                       | 79                    |
| 5     | $\text{Pd}_2(\text{dba})_3$                     | 84                       | 83                    |
| 6     | $\text{Pd}_2(\text{dba})_3 \cdot \text{CHCl}_3$ | 80                       | 88                    |

[a] The reaction was performed using 0.1 mmol of **1a** and 0.15 mmol of **2a** (0.1 M) for 60 h. [b] Yield determined by <sup>1</sup>H NMR using  $\text{CH}_2\text{BrCH}_2\text{Br}$  as an internal standard. [c] Determined by HPLC using a chiral stationary phase.



## 2.4 Table S4. Screening of the Amount of ligand for Reaction<sup>[a]</sup>

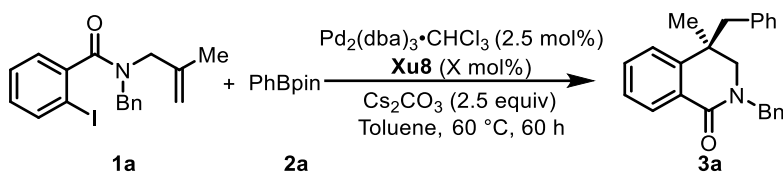

| Entry            | X   | Yield [%] <sup>[b]</sup> | ee [%] <sup>[c]</sup> |
|------------------|-----|--------------------------|-----------------------|
| 1                | 5   | 90                       | 92                    |
| 2                | 7.5 | 86                       | 89                    |
| 3                | 10  | 80                       | 88                    |
| 4 <sup>[d]</sup> | 5   | 64                       | 89                    |

[a] The reaction was performed using 0.1 mmol of **1a** and 0.15 mmol of **2a** (0.1 M) for 60 h. [b] Yield determined by HNMR using  $\text{CH}_2\text{BrCH}_2\text{Br}$  as an internal standard. [c] Determined by HPLC using a chiral stationary phase. [d] 0.15 mmol of phenyl boronic acid was used.

## 2.5 Table S5. Screening of Bases for Reaction<sup>[a]</sup>

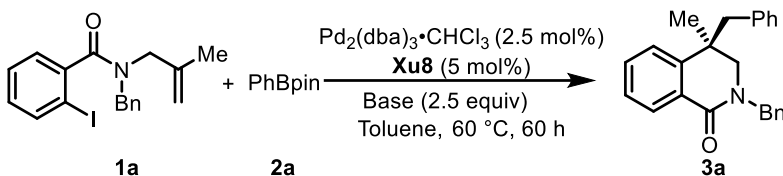

| Entry | Base                                            | Yield [%] <sup>[b]</sup> | ee [%] <sup>[c]</sup> |
|-------|-------------------------------------------------|--------------------------|-----------------------|
| 1     | NaOH                                            | 10                       | 62                    |
| 2     | NaOMe                                           | 19                       | 60                    |
| 3     | $\text{K}_2\text{CO}_3$                         | trace                    | -                     |
| 4     | $\text{K}_3\text{PO}_4$                         | trace                    | -                     |
| 5     | $\text{NEt}_3$                                  | NR                       | -                     |
| 6     | $\text{KO}^t\text{Bu}$                          | 66                       | 85                    |
| 7     | CsF                                             | trace                    | -                     |
| 8     | CsOAc                                           | trace                    | -                     |
| 9     | $\text{Cs}(\text{OH}) \cdot \text{H}_2\text{O}$ | 88                       | 81                    |
| 10    | $\text{Cs}_2\text{CO}_3$                        | 90                       | 92                    |

[a] The reaction was performed using 0.1 mmol of **1a** and 0.15 mmol of **2a** (0.1 M) for 60 h. [b] Yield determined by HNMR using  $\text{CH}_2\text{BrCH}_2\text{Br}$  as an internal standard. [c] Determined by HPLC using a chiral stationary phase. NR = no reaction.

### 3. General procedure

To a sealed tube was added **Xu8** (5 mol%) and  $\text{Pd}_2(\text{dba})_3 \cdot \text{CHCl}_3$  (2.5 mol%). The flask was evacuated and refilled with argon. Toluene (1.0 mL/0.1 mmol) was added to the tube, and stirred at room temperature for 1 h. Then under argon atmosphere  $\text{Cs}_2\text{CO}_3$  (2.5 equiv), **2** (1.5 equiv), *N*-allyl carboxamide (0.1/0.3 mmol) were successively added. The reaction mixture was kept stirring at 60 °C for 60 h or 60 °C for 60 h, then 70 °C for 24 h. After completion of the reaction (monitored by TLC), the mixture was concentrated in vacuum and the residue was purified by flash column chromatography on silica gel with petroleum ether-ethyl acetate as eluent to give the desired product.

#### Characterization data of products:

##### (*R*)-2,4-dibenzyl-4-methyl-3,4-dihydroisoquinolin-1(2H)-one (**3a**)

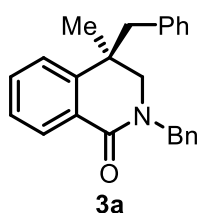

Prepared according to typical procedure from **2a** (61.2 mg, 0.3 mmol), *N*-allyl carboxamide **1a** (78.2 mg, 0.2 mmol), after a flash column chromatography (hexanes: EA = 20:1-10:1) afforded the product **3a** as a yellow oil (57.0 mg, 84% yield) with 92% *ee*. **<sup>1</sup>H NMR** (400 MHz,  $\text{CDCl}_3$ )  $\delta$  8.29-8.27 (m, 1H), 7.46-7.29 (m, 7H), 7.25-7.13 (m, 3H), 7.00-6.91 (m, 1H), 6.78-6.66 (m, 2H), 4.97 (d,  $J$  = 14.4 Hz, 1H), 4.75 (d,  $J$  = 14.4 Hz, 1H), 3.40 (d,  $J$  = 12.6 Hz, 1H), 3.15 (d,  $J$  = 12.7 Hz, 1H), 2.88 (d,  $J$  = 13.2 Hz, 1H), 2.65 (d,  $J$  = 13.3 Hz, 1H), 1.24 (s, 3H); **<sup>13</sup>C NMR** (101 MHz,  $\text{CDCl}_3$ )  $\delta$  164.4, 144.9, 136.9, 136.8, 131.6, 130.5, 128.8, 128.6 (two peaks overlap), 128.1, 127.7, 127.6, 126.9, 126.4, 124.8, 55.6, 50.8, 45.9, 37.9, 22.1. **HRMS** (EI):  $m/z$ :  $[\text{M}]^+$  Calcd for  $\text{C}_{24}\text{H}_{23}\text{NO}$ : 341.1780, found 341.1778. HPLC (AD-H, 2-propanol /n-hexane = 10/90, flow rate = 1.0 mL/min,  $\lambda$  = 254 nm)  $t_R$  = 16.6 min (major), 29.4 min (minor).  $[\alpha]_D^{20}$  = -165.3 ( $c$  = 0.5,  $\text{CHCl}_3$ ).

<Chromatogram>

mAU

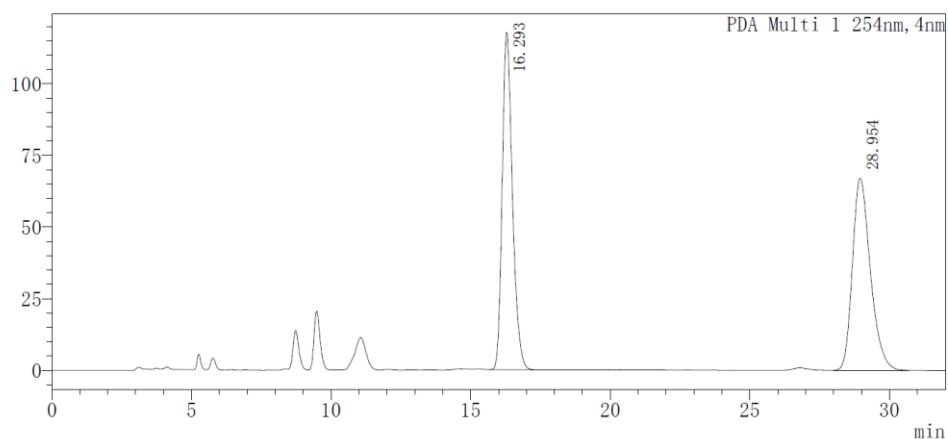

<Peak Table>

PDA Ch1 254nm

| No.   | Ret. Time (min) | Height (mAU) | Height% | Area (mAU*min) | Area%   |
|-------|-----------------|--------------|---------|----------------|---------|
| 1     | 16.293          | 117665       | 63.682  | 3005556        | 50.025  |
| 2     | 28.954          | 67105        | 36.318  | 3002581        | 49.975  |
| Total |                 | 184770       | 100.000 | 6008137        | 100.000 |

<Chromatogram>

mAU

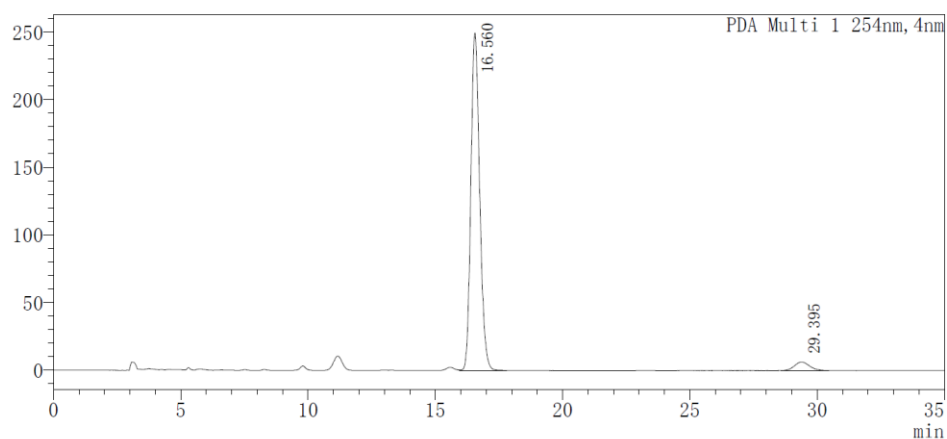

<Peak Table>

PDA Ch1 254nm

| No.   | Ret. Time (min) | Height (mAU) | Height% | Area (mAU*min) | Area%   |
|-------|-----------------|--------------|---------|----------------|---------|
| 1     | 16.560          | 249322       | 97.534  | 6008876        | 95.898  |
| 2     | 29.395          | 6304         | 2.466   | 257018         | 4.102   |
| Total |                 | 255626       | 100.000 | 6265895        | 100.000 |

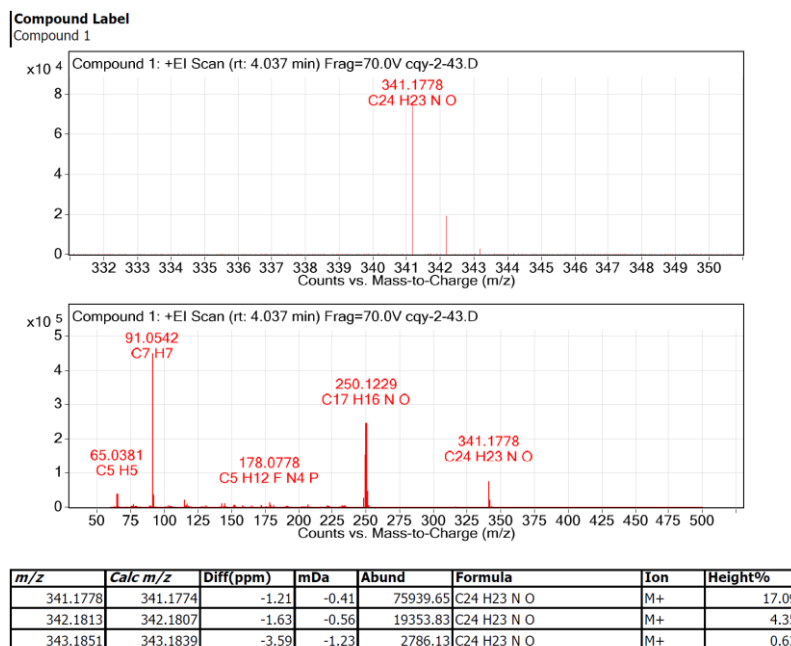

**(*R*)-2-benzyl-4-methyl-4-(4-methylbenzyl)-3,4-dihydroisoquinolin-1(2H)-one (3b)**

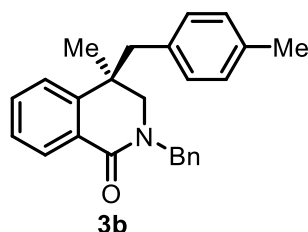

Prepared according to typical procedure from **2b** (65.4 mg, 0.3 mmol), *N*-allyl carboxamide **1a** (78.2 mg, 0.2 mmol), after a flash column chromatography (hexanes: EA = 20:1-10:1) afforded the product **3b** as a yellow oil (66.7 mg, 94% yield) with 92% *ee*. <sup>1</sup>H NMR (400 MHz, CDCl<sub>3</sub>) δ 8.28-8.26 (m, 1H), 7.43-7.28 (m, 7H), 7.01-6.96 (m, 3H), 6.62 (d, *J* = 8.0 Hz, 2H), 4.98 (d, *J* = 14.4 Hz, 1H), 4.73 (d, *J* = 14.5 Hz, 1H), 3.38 (d, *J* = 12.6 Hz, 1H), 3.14 (d, *J* = 12.6 Hz, 1H), 2.83 (d, *J* = 13.3 Hz, 1H), 2.63 (d, *J* = 13.3 Hz, 1H), 2.33 (s, 3H), 1.22 (s, 3H); <sup>13</sup>C NMR (101 MHz, CDCl<sub>3</sub>) δ 164.5, 145.1, 137.0, 135.9, 133.7, 131.6, 130.4, 128.8, 128.6 (two peaks overlap), 128.4, 128.1, 127.6, 126.9, 124.8, 55.5, 50.9, 45.4, 37.9, 22.0, 21.0. HRMS (EI): *m/z*: [M]<sup>+</sup> Calcd for C<sub>25</sub>H<sub>25</sub>NO: 355.1936, found 355.1935. HPLC (AD-H, 2-propanol /n-hexane = 10/90, flow rate = 1.0 mL/min, λ = 254 nm) t<sub>R</sub> = 15.2 min (major), 24.8 min (minor). [α]<sub>D</sub><sup>20</sup> = -183.2 (*c* = 0.5, CHCl<sub>3</sub>).

<Chromatogram>

mAU

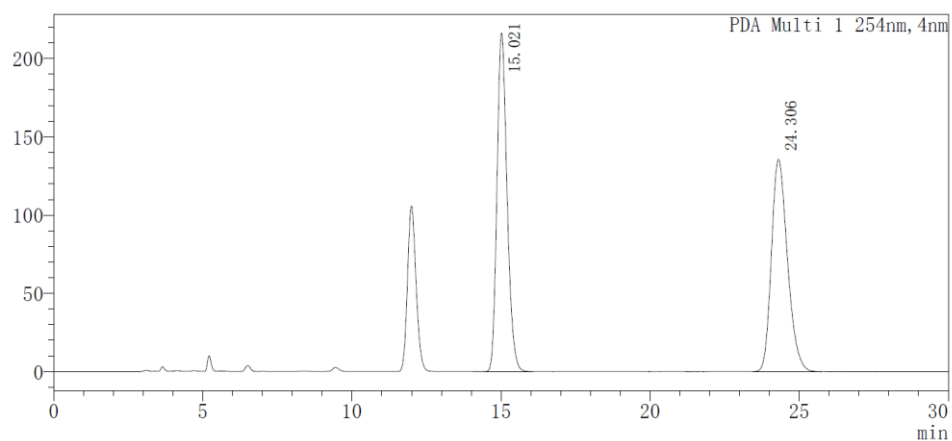

<Peak Table>

PDA Ch1 254nm

| No.   | Ret. Time (min) | Height (mAU) | Height% | Area (mAU*min) | Area%   |
|-------|-----------------|--------------|---------|----------------|---------|
| 1     | 15.021          | 216262       | 61.451  | 5090707        | 50.047  |
| 2     | 24.306          | 135665       | 38.549  | 5081100        | 49.953  |
| Total |                 | 351927       | 100.000 | 10171807       | 100.000 |

<Chromatogram>

mAU

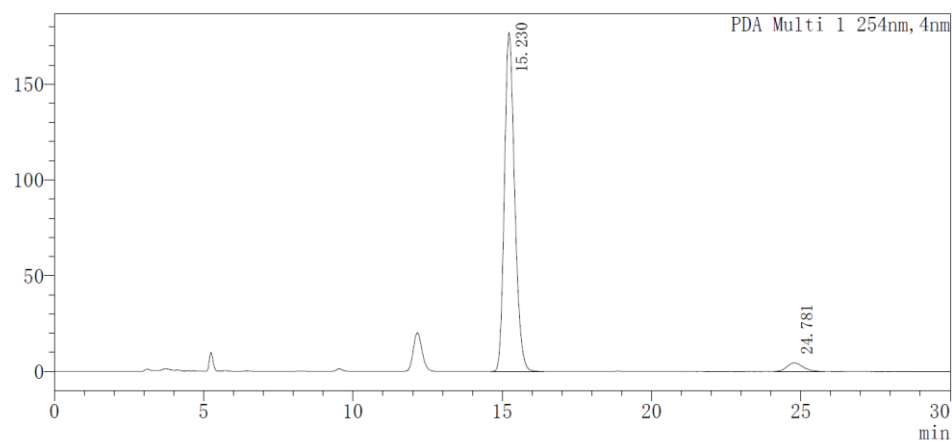

<Peak Table>

PDA Ch1 254nm

| No.   | Ret. Time (min) | Height (mAU) | Height% | Area (mAU*min) | Area%   |
|-------|-----------------|--------------|---------|----------------|---------|
| 1     | 15.230          | 176902       | 97.504  | 4222886        | 96.161  |
| 2     | 24.781          | 4529         | 2.496   | 168611         | 3.839   |
| Total |                 | 181431       | 100.000 | 4391497        | 100.000 |

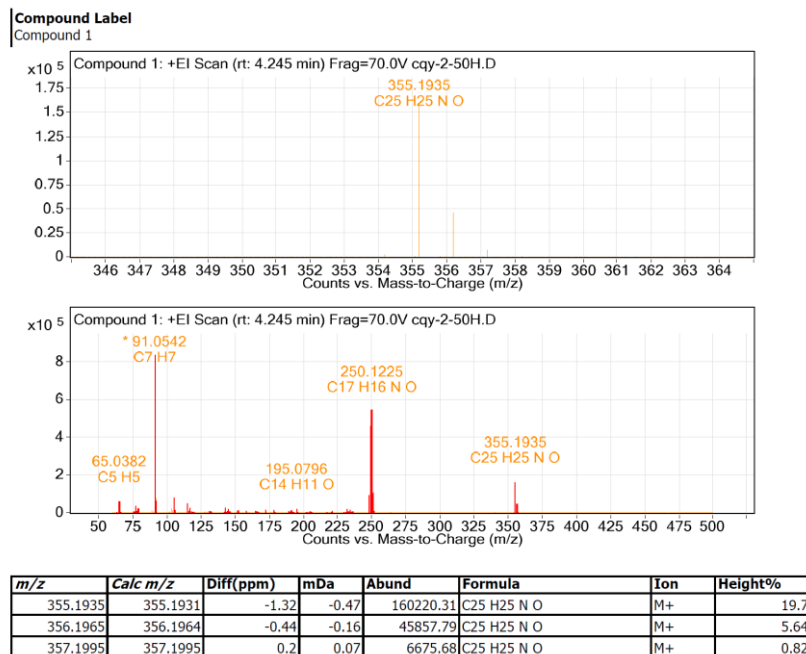

**(*R*)-2-benzyl-4-(4-(*tert*-butyl)benzyl)-4-methyl-3,4-dihydroisoquinolin-1(2*H*)-one (3c)**

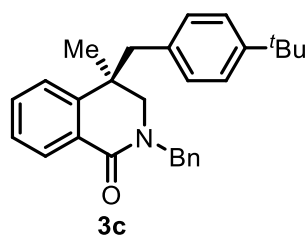

Prepared according to typical procedure from **2c** (78.1 mg, 0.3 mmol), *N*-allyl carboxamide **1a** (78.2 mg, 0.2 mmol), after a flash column chromatography (hexanes: EA = 20:1-10:1) afforded the product **3c** as a yellow oil (50.5 mg, 86% yield) with 91% *ee*. **<sup>1</sup>H NMR** (400 MHz, CDCl<sub>3</sub>) δ 8.30-8.27 (m, 1H), 7.43-7.31 (m, 7H), 7.24-7.21 (m, 2H), 7.04-7.00 (m, 1H), 6.72-6.69 (m, 2H), 5.01 (d, *J* = 14.4 Hz, 1H), 4.73 (d, *J* = 14.4 Hz, 1H), 3.38 (d, *J* = 12.6 Hz, 1H), 3.16 (d, *J* = 12.7 Hz, 1H), 2.82 (d, *J* = 13.3 Hz, 1H), 2.67 (d, *J* = 13.4 Hz, 1H), 1.34 (s, 9H), 1.24 (s, 3H); **<sup>13</sup>C NMR** (101 MHz, CDCl<sub>3</sub>) δ 164.5, 149.3, 145.3, 136.9, 133.7, 131.6, 130.2, 128.7, 128.6, 128.6, 128.0, 127.5, 126.8, 124.7, 124.6, 55.3, 50.8, 45.3, 37.9, 31.3, 24.8, 22.1. **HRMS** (EI): *m/z*: [M]<sup>+</sup> Calcd for C<sub>28</sub>H<sub>31</sub>NO: 397.2406, found 397.2401. HPLC (AD-H, 2-propanol /*n*-hexane = 10/90, flow rate = 1.0 mL/min, λ = 254 nm) t<sub>R</sub> = 9.8 min (major), 13.8 min (minor). [α]<sub>D</sub><sup>20</sup> = -142.0 (*c* = 0.5, CHCl<sub>3</sub>).

<Chromatogram>

mAU

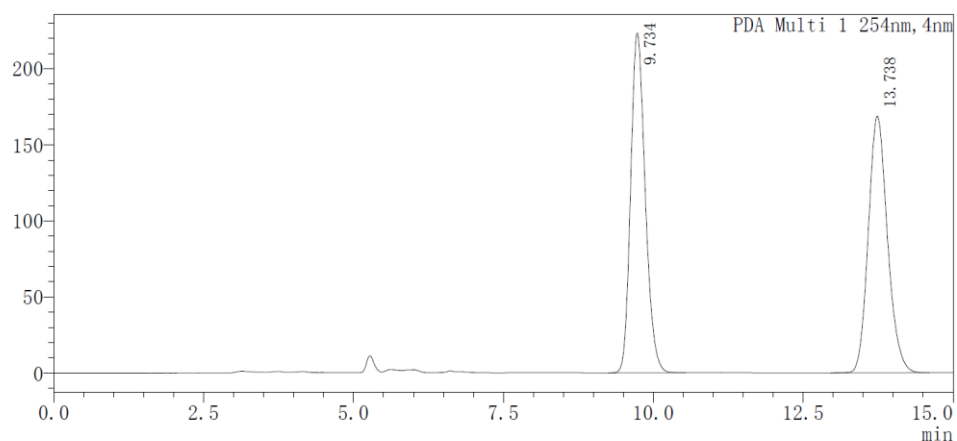

<Peak Table>

PDA Ch1 254nm

| No.   | Ret. Time (min) | Height (mAU) | Height% | Area (mAU*min) | Area%   |
|-------|-----------------|--------------|---------|----------------|---------|
| 1     | 9.734           | 223236       | 56.940  | 3784322        | 50.170  |
| 2     | 13.738          | 168817       | 43.060  | 3758717        | 49.830  |
| Total |                 | 392053       | 100.000 | 7543039        | 100.000 |

<Chromatogram>

mAU

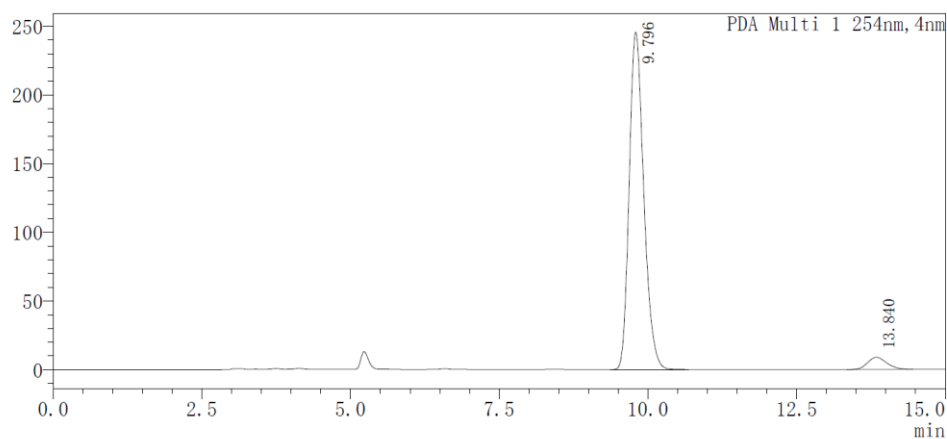

<Peak Table>

PDA Ch1 254nm

| No.   | Ret. Time (min) | Height (mAU) | Height% | Area (mAU*min) | Area%   |
|-------|-----------------|--------------|---------|----------------|---------|
| 1     | 9.796           | 245561       | 96.500  | 4185859        | 95.419  |
| 2     | 13.840          | 8906         | 3.500   | 200955         | 4.581   |
| Total |                 | 254467       | 100.000 | 4386814        | 100.000 |

**(R)-2-benzyl-4-(4-methoxybenzyl)-4-methyl-3,4-dihydroisoquinolin-1(2H)-one (3d)**

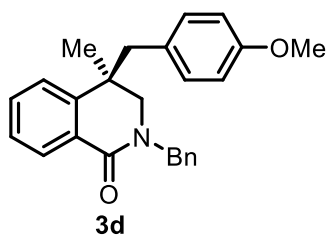

Prepared according to typical procedure from **2d** (70.5 mg, 0.3 mmol), *N*-allyl carboxamide **1a** (78.2 mg, 0.2 mmol), after a flash column chromatography (hexanes: EA = 20:1-10:1) afforded the product **3d** as a yellow oil (54.8 mg, 74% yield) with 93% *ee*. **<sup>1</sup>H NMR** (400 MHz, CDCl<sub>3</sub>) δ 8.29-8.25 (m, 1H), 7.41-7.30 (m, 7H), 6.96-6.93 (m, 1H), 6.74-6.72 (m, 2H), 6.64-6.61 (m, 2H), 4.95 (d, *J* = 14.4 Hz, 1H), 4.75 (d, *J* = 14.5 Hz, 1H), 3.79 (s, 3H), 3.39 (d, *J* = 12.6 Hz, 1H), 3.13 (d, *J* = 12.6 Hz, 1H), 2.82 (d, *J* = 13.4 Hz, 1H), 2.59 (d, *J* = 13.5 Hz, 1H), 1.22 (s, 3H); **<sup>13</sup>C NMR** (101 MHz, CDCl<sub>3</sub>) δ 164.5, 158.3, 145.1, 137.1, 131.6, 131.5, 128.9, 128.8, 128.73, 128.7, 128.1, 127.6, 126.9, 124.9, 113.2, 55.6, 55.2, 50.9, 45.0, 38.0, 22.1. **HRMS** (EI): *m/z*: [M]<sup>+</sup> Calcd for C<sub>25</sub>H<sub>25</sub>NO<sub>2</sub>: 371.1885, found 371.1882. HPLC (AD-H, 2-propanol /n-hexane = 10/90, flow rate = 1.0 mL/min, λ = 254 nm) tR = 22.4 min (major), 42.5 min (minor). [α]<sub>D</sub><sup>20</sup> = -169.1 (*c* = 0.5, CHCl<sub>3</sub>).

<Chromatogram>  
mAU

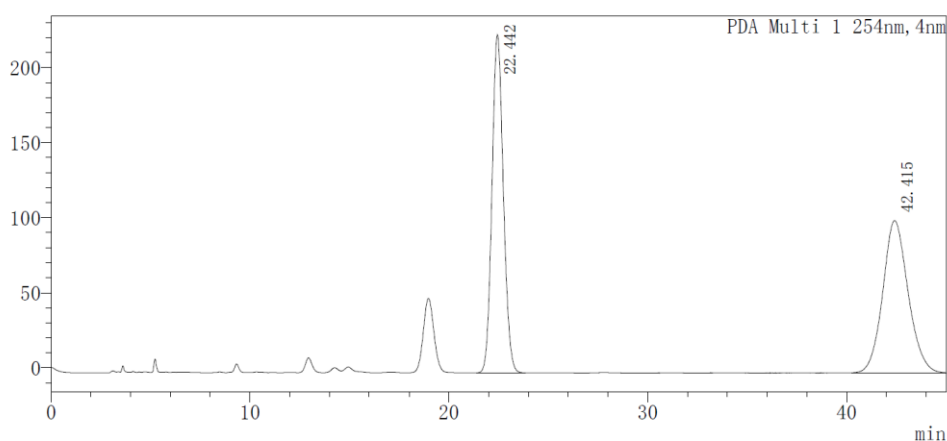

<Peak Table>

PDA Ch1 254nm

| No.   | Ret. Time (min) | Height (mAU) | Height% | Area (mAU*min) | Area%   |
|-------|-----------------|--------------|---------|----------------|---------|
| 1     | 22.442          | 225149       | 68.971  | 8950383        | 50.032  |
| 2     | 42.415          | 101290       | 31.029  | 8939082        | 49.968  |
| Total |                 | 326439       | 100.000 | 17889465       | 100.000 |



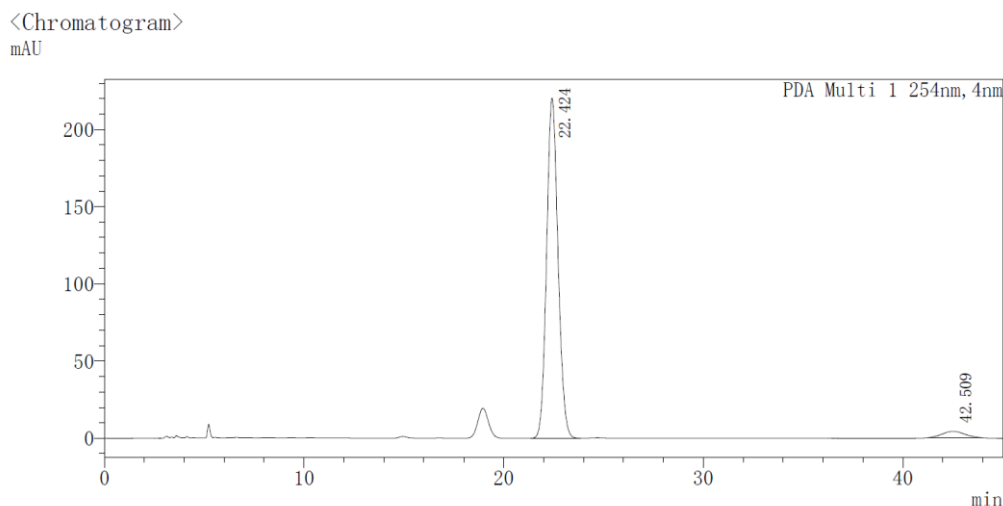

<Peak Table>

PDA Ch1 254nm

| No.   | Ret. Time (min) | Height (mAU) | Height% | Area (mAU*min) | Area%   |
|-------|-----------------|--------------|---------|----------------|---------|
| 1     | 22.424          | 220214       | 98.167  | 8750975        | 96.510  |
| 2     | 42.509          | 4111         | 1.833   | 316434         | 3.490   |
| Total |                 | 224326       | 100.000 | 9067409        | 100.000 |

**(*R*)-2-benzyl-4-(4-fluorobenzyl)-4-methyl-3,4-dihydroisoquinolin-1(2H)-one (3e)**

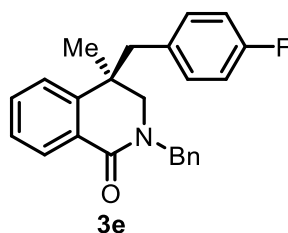

Prepared according to typical procedure from **2e** (66.6 mg, 0.3 mmol), *N*-allyl carboxamide **1a** (78.2 g, 0.2 mmol), after a flash column chromatography (hexanes: EA = 20:1-10:1) afforded the product **3e** as a yellow oil (50.0 mg, 72% yield) with 94% *ee*. <sup>1</sup>H NMR (400 MHz, CDCl<sub>3</sub>) δ 8.25-8.22 (m, 1H), 7.40-7.29 (m, 7H), 6.86-6.80 (m, 3H), 6.60-6.56 (m, 2H), 4.85-4.76 (m, 2H), 3.41 (d, *J* = 12.7 Hz, 1H), 3.10 (d, *J* = 12.7 Hz, 1H), 2.83 (d, *J* = 13.4 Hz, 1H), 2.54 (d, *J* = 13.4 Hz, 1H), 1.19 (s, 3H); <sup>13</sup>C NMR (101 MHz, CDCl<sub>3</sub>) 164.4, 161.6 (d, *J* = 244.7 Hz), 144.4, 136.9, 131.8 (d, *J* = 7.8 Hz), 131.6, 129.5, 128.8, 128.7 (d, *J* = 2.3 Hz), 128.4, 128.1, 127.7, 127.1, 124.9, 114.5 (d, *J* = 21.1 Hz), 55.7, 50.8, 44.9, 37.9, 21.9; <sup>19</sup>F NMR (376 MHz, CDCl<sub>3</sub>) δ -116.51; HRMS (EI): *m/z*: [M]<sup>+</sup> Calcd for C<sub>24</sub>H<sub>22</sub>FN<sub>2</sub>O: 359.1685, found 359.1680. HPLC (AD-H, 2-propanol /n-hexane = 10/90, flow rate = 1.0 mL/min, λ = 254 nm) tR = 19.0 min (major), 40.3 min (minor). [α]<sub>D</sub><sup>20</sup> = -94.5 (*c* = 0.5, CHCl<sub>3</sub>).

<Chromatogram>

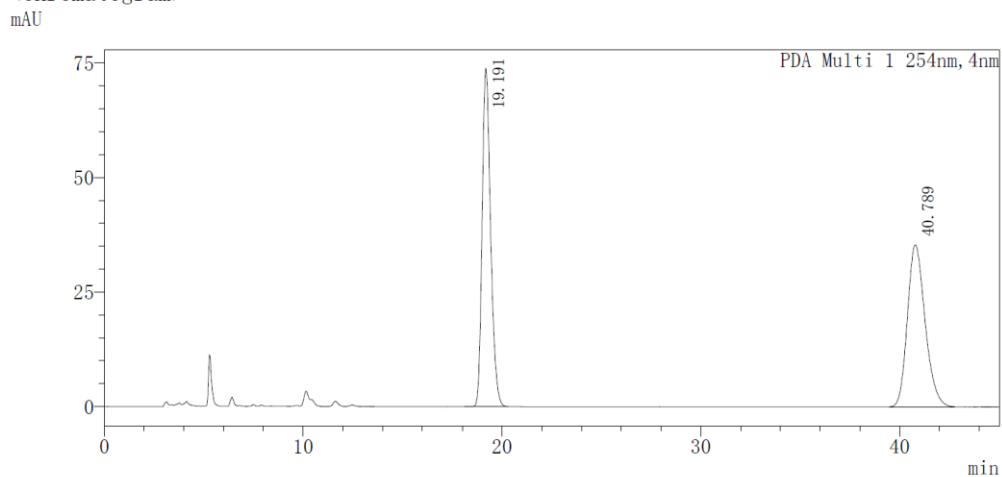

<Peak Table>

PDA Ch1 254nm

| No.   | Ret. Time (min) | Height (mAU) | Height% | Area (mAU*min) | Area%   |
|-------|-----------------|--------------|---------|----------------|---------|
| 1     | 19.191          | 73812        | 67.597  | 2195441        | 50.096  |
| 2     | 40.789          | 35383        | 32.403  | 2186988        | 49.904  |
| Total |                 | 109195       | 100.000 | 4382429        | 100.000 |

<Chromatogram>

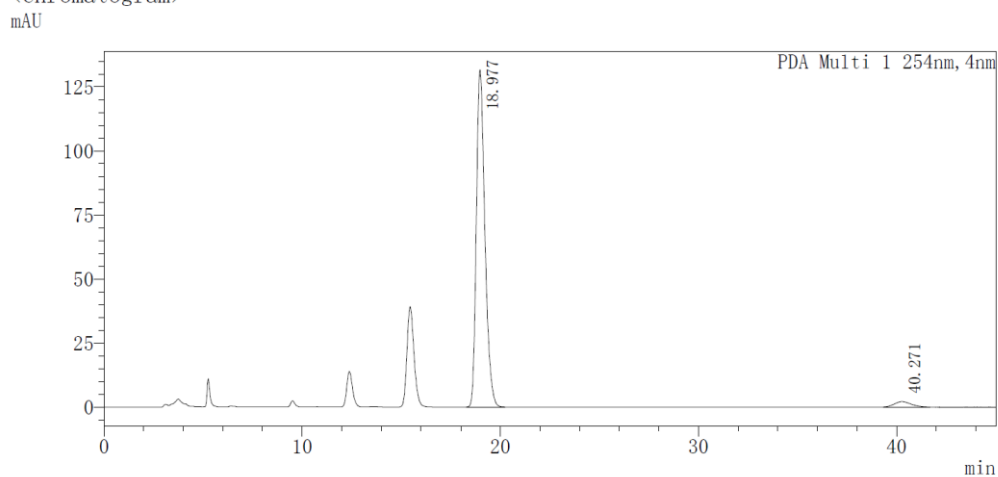

<Peak Table>

PDA Ch1 254nm

| No.   | Ret. Time (min) | Height (mAU) | Height% | Area (mAU*min) | Area%   |
|-------|-----------------|--------------|---------|----------------|---------|
| 1     | 18.977          | 131523       | 98.429  | 3947499        | 96.991  |
| 2     | 40.271          | 2099         | 1.571   | 122479         | 3.009   |
| Total |                 | 133622       | 100.000 | 4069978        | 100.000 |

**(R)-2-benzyl-4-(4-chlorobenzyl)-4-methyl-3,4-dihydroisoquinolin-1(2H)-one (3f)**

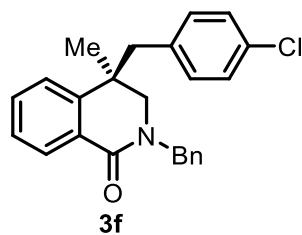

Prepared according to typical procedure from **2f** (71.6 mg, 0.3 mmol), *N*-allyl carboxamide **1a** (78.2 mg, 0.2 mmol), after a flash column chromatography (hexanes: EA = 20:1-10:1) afforded the product **3f** as a yellow oil (70.7 mg, 94% yield) with 89% *ee*. **<sup>1</sup>H NMR** (400 MHz, CDCl<sub>3</sub>) δ 8.29-8.25 (m, 1H), 7.43-7.28 (m, 7H), 7.15-7.08 (m, 2H), 6.90-6.85 (m, 1H), 6.59-6.54 (m, 2H), 4.84 (s, 2H), 3.43 (d, *J* = 12.7 Hz, 1H), 3.12 (d, *J* = 12.7 Hz, 1H), 2.84 (d, *J* = 13.3 Hz, 1H), 2.56 (d, *J* = 13.3 Hz, 1H), 1.21 (s, 3H); **<sup>13</sup>C NMR** (101 MHz, CDCl<sub>3</sub>) δ 164.4, 144.4, 137.0, 135.3, 132.4, 131.8, 131.7, 128.9, 128.8 (two peaks overlap), 128.1, 127.9, 127.7, 127.2, 125.0, 55.7, 50.9, 45.1, 37.9, 21.9. **HRMS** (EI): *m/z*: [M]<sup>+</sup> Calcd for C<sub>24</sub>H<sub>22</sub>ClNO: 375.1390, found 375.1387. HPLC (AD-H, 2-propanol /n-hexane = 10/90, flow rate = 1.0 mL/min, λ = 254 nm) tR = 18.8 min (major), 36.1 min (minor). [α]<sub>D</sub><sup>20</sup> = -179.3 (*c* = 0.5, CHCl<sub>3</sub>).

<Chromatogram>  
mAU

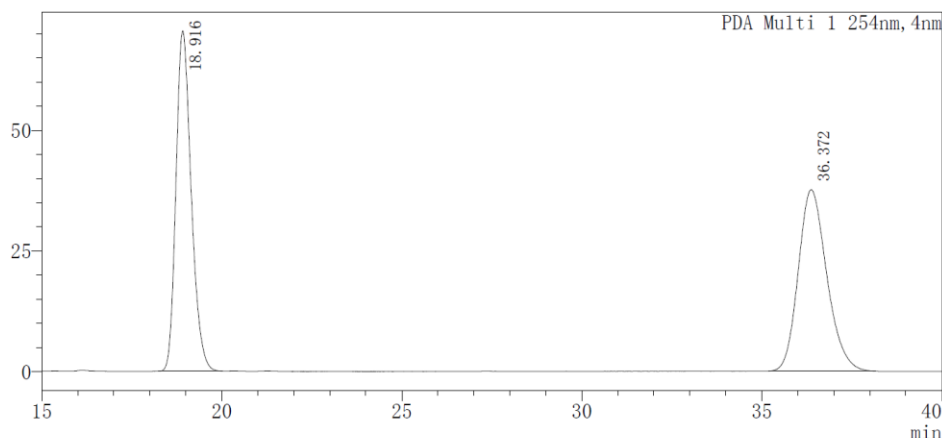

<Peak Table>

PDA Ch1 254nm

| No.   | Ret. Time (min) | Height (mAU) | Height% | Area (mAU*min) | Area%   |
|-------|-----------------|--------------|---------|----------------|---------|
| 1     | 18.916          | 70512        | 65.226  | 2073862        | 50.028  |
| 2     | 36.372          | 37592        | 34.774  | 2071516        | 49.972  |
| Total |                 | 108104       | 100.000 | 4145378        | 100.000 |

<Chromatogram>  
mAU

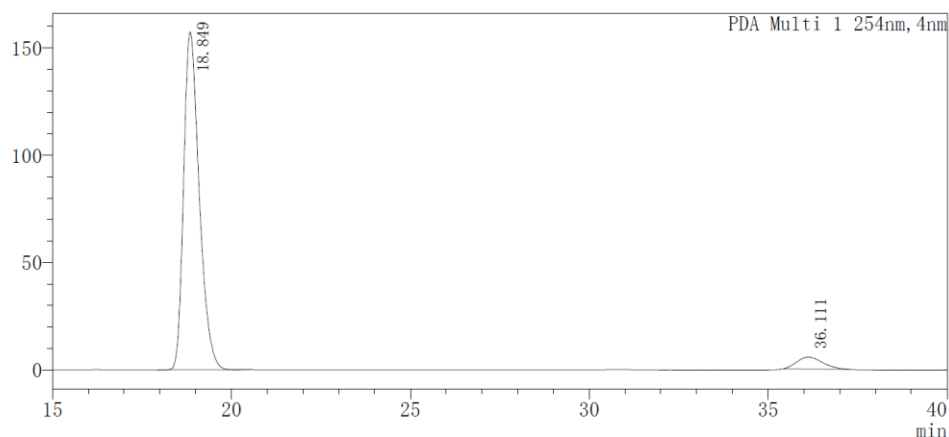

<Peak Table>

PDA Ch1 254nm

| No.   | Ret. Time (min) | Height (mAU) | Height% | Area (mAU*min) | Area%   |
|-------|-----------------|--------------|---------|----------------|---------|
| 1     | 18.849          | 157404       | 96.590  | 4772466        | 94.470  |
| 2     | 36.111          | 5557         | 3.410   | 279385         | 5.530   |
| Total |                 | 162960       | 100.000 | 5051851        | 100.000 |

**(R)-2-benzyl-4-(4-bromobenzyl)-4-methyl-3,4-dihydroisoquinolin-1(2H)-one (3g)**

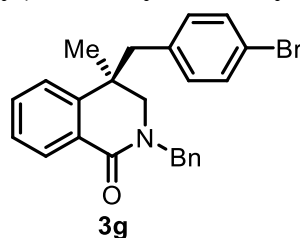

Prepared according to typical procedure from **2g** (84.8 mg, 0.3 mmol), *N*-allyl carboxamide **1a** (78.2 mg, 0.2 mmol), after a flash column chromatography (hexanes: EA = 20:1-10:1) afforded the product **3g** as a yellow oil (47.2 mg, 58% yield) with 88% *ee*. **<sup>1</sup>H NMR** (400 MHz, CDCl<sub>3</sub>) δ 8.28-8.25 (m, 1H), 7.42-7.31 (m, 7H), 7.29-7.25 (m, 2H), 6.89-6.86 (m, 1H), 6.52-6.48 (m, 2H), 4.83 (s, 2H), 3.43 (d, *J* = 12.7 Hz, 1H), 3.12 (d, *J* = 12.7 Hz, 1H), 2.82 (d, *J* = 13.2 Hz, 1H), 2.54 (d, *J* = 13.3 Hz, 1H), 1.20 (s, 3H); **<sup>13</sup>C NMR** (101 MHz, CDCl<sub>3</sub>) δ 164.3, 144.2, 136.9, 135.7, 132.1, 131.6, 130.8, 128.8, 128.7 (two peaks overlap), 128.0, 127.7, 127.1, 124.9, 120.5, 55.6, 50.8, 45.1, 37.8, 21.8. **HRMS** (EI): *m/z*: [M]<sup>+</sup> Calcd for C<sub>24</sub>H<sub>22</sub>BrNO: 419.0885, found 419.0884. HPLC (AD-H, 2-propanol /n-hexane = 10/90, flow rate = 1.0 mL/min, λ = 254 nm) tR = 19.4 min (major), 36.1 min (minor). [α]<sub>D</sub><sup>20</sup> = -175.0 (*c* = 0.5, CHCl<sub>3</sub>).

<Chromatogram>

mAU

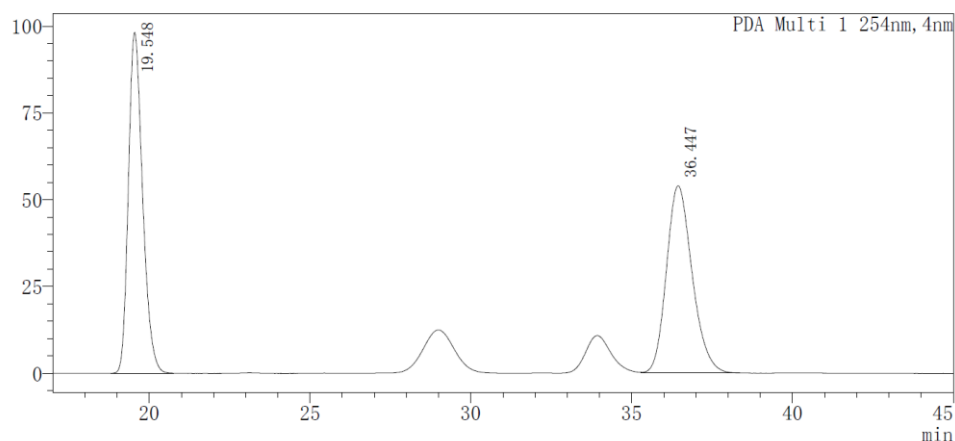

<Peak Table>

PDA Ch1 254nm

| No.   | Ret. Time (min) | Height (mAU) | Height% | Area (mAU*min) | Area%   |
|-------|-----------------|--------------|---------|----------------|---------|
| 1     | 19.548          | 98161        | 64.530  | 3010575        | 50.049  |
| 2     | 36.447          | 53956        | 35.470  | 3004625        | 49.951  |
| Total |                 | 152117       | 100.000 | 6015200        | 100.000 |

<Chromatogram>

mAU

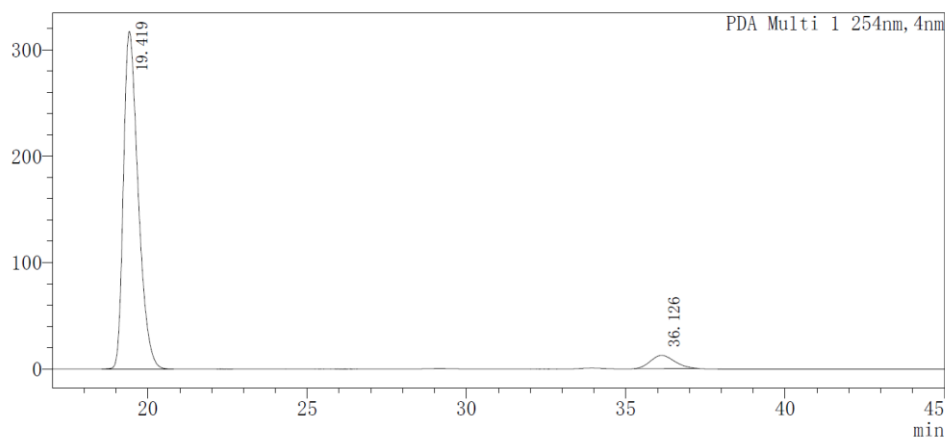

<Peak Table>

PDA Ch1 254nm

| No.   | Ret. Time (min) | Height (mAU) | Height% | Area (mAU*min) | Area%   |
|-------|-----------------|--------------|---------|----------------|---------|
| 1     | 19.419          | 317095       | 96.241  | 10191977       | 94.019  |
| 2     | 36.126          | 12384        | 3.759   | 648381         | 5.981   |
| Total |                 | 329479       | 100.000 | 10840359       | 100.000 |

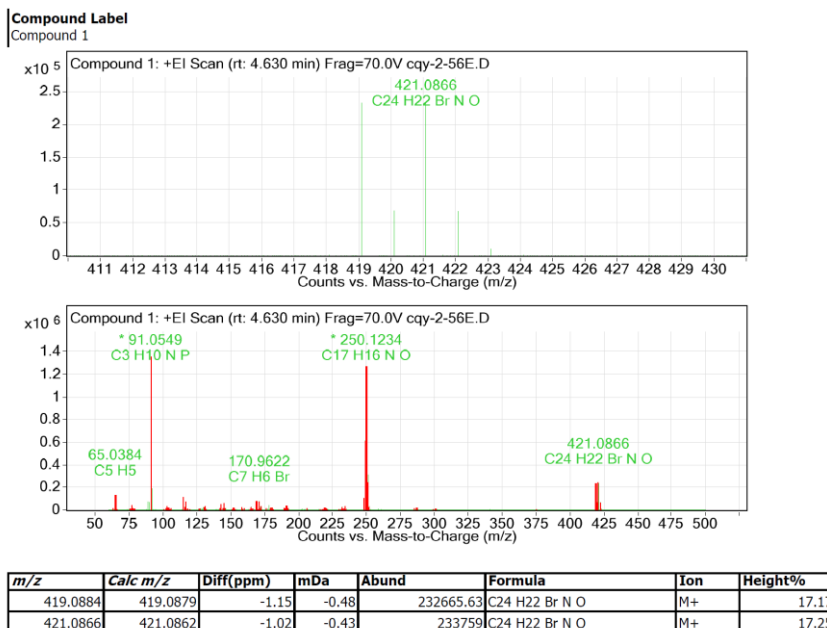

**(*R*)-4-([1,1'-biphenyl]-4-ylmethyl)-2-benzyl-4-methyl-3,4-dihydroisoquinolin-1(2H)-one (3h)**

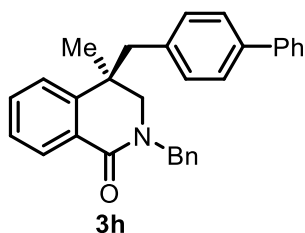

Prepared according to typical procedure from **2h** (84.1 mg, 0.3 mmol), *N*-allyl carboxamide **1a** (78.2 mg, 0.2 mmol), after a flash column chromatography (hexanes: EA = 20:1-10:1) afforded the product **3h** as a yellow oil (75.1 mg, 90% yield) with 91% *ee*. **<sup>1</sup>H NMR** (400 MHz, CDCl<sub>3</sub>) δ 8.32-8.29 (m, 1H), 7.62-7.59 (m, 2H), 7.49-7.31 (m, 12H), 7.02-6.98 (m, 1H), 6.80-6.78 (m, 2H), 4.97 (d, *J* = 14.4 Hz, 1H), 4.82 (d, *J* = 14.4 Hz, 1H), 3.44 (d, *J* = 12.7 Hz, 1H), 3.20 (d, *J* = 12.7 Hz, 1H), 2.92 (d, *J* = 13.2 Hz, 1H), 2.70 (d, *J* = 13.2 Hz, 1H), 1.28 (s, 3H); **<sup>13</sup>C NMR** (101 MHz, CDCl<sub>3</sub>) δ 164.4, 144.8, 140.6, 139.2, 136.9, 135.9, 131.6, 130.9, 128.8, 128.7, 128.7, 128.6, 128.0, 127.6, 127.1, 127.0, 126.9, 126.4, 124.9, 55.5, 50.8, 45.4, 38.0, 22.0. **HRMS** (EI): *m/z*: [M]<sup>+</sup> Calcd for C<sub>30</sub>H<sub>27</sub>NO: 417.2093, found 417.2089. HPLC (AD-H, 2-propanol /n-hexane = 10/90, flow rate = 1.0 mL/min, λ = 254 nm) tR = 22.6 min (major), 38.2 min (minor). [α]<sub>D</sub><sup>20</sup> = -206.3 (*c* = 0.25, CHCl<sub>3</sub>).

<Chromatogram>

mAU

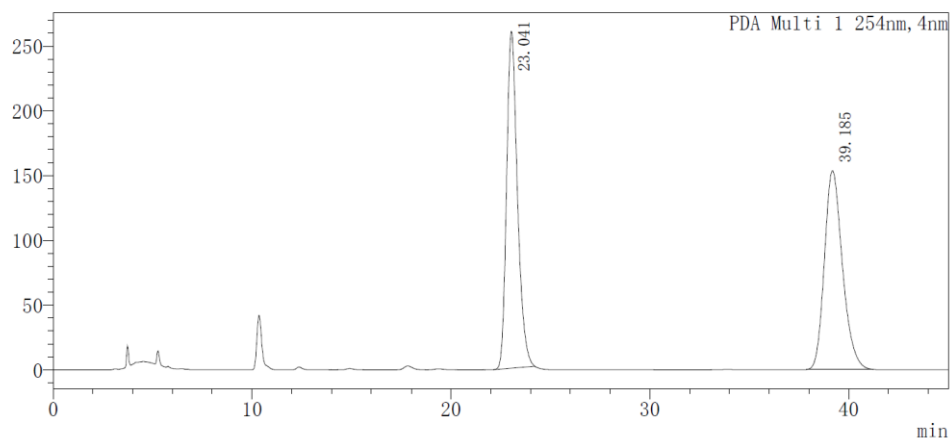

<Peak Table>

PDA Ch1 254nm

| No.   | Ret. Time (min) | Height (mAU) | Height% | Area (mAU*min) | Area%   |
|-------|-----------------|--------------|---------|----------------|---------|
| 1     | 23.041          | 260159       | 62.877  | 9871216        | 50.464  |
| 2     | 39.185          | 153601       | 37.123  | 9689787        | 49.536  |
| Total |                 | 413760       | 100.000 | 19561003       | 100.000 |

<Chromatogram>

mAU

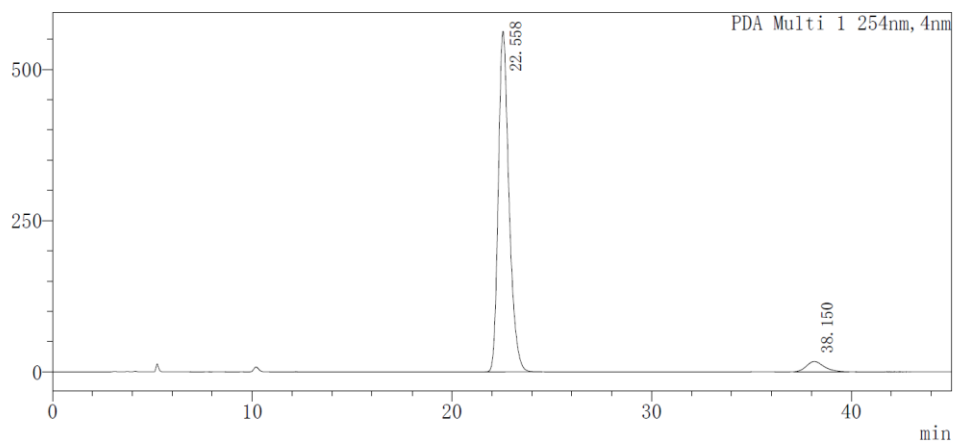

<Peak Table>

PDA Ch1 254nm

| No.   | Ret. Time (min) | Height (mAU) | Height% | Area (mAU*min) | Area%   |
|-------|-----------------|--------------|---------|----------------|---------|
| 1     | 22.558          | 562824       | 97.099  | 20970024       | 95.370  |
| 2     | 38.150          | 16816        | 2.901   | 1018121        | 4.630   |
| Total |                 | 579640       | 100.000 | 21988144       | 100.000 |

**(*R*)-4-((2-benzyl-4-methyl-1-oxo-1,2,3,4-tetrahydroisoquinolin-4-yl)methyl) benzonitrile (3i)**

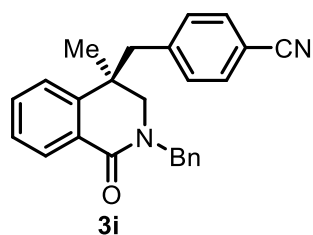

Prepared according to typical procedure from **2i** (68.7 mg, 0.3 mmol), *N*-allyl carboxamide **1a** (78.2 mg, 0.2 mmol), after a flash column chromatography (hexanes: EA = 10:1-5:1) afforded the product **3i** as a yellow oil (69.1 mg, 94% yield) with 90% *ee*. **<sup>1</sup>H NMR** (400 MHz, CDCl<sub>3</sub>) δ 8.26 (dd, *J* = 7.5, 1.8 Hz, 1H), 7.43-7.30 (m, 9H), 6.80-6.78 (m, 1H), 6.68-6.66 (m, 2H), 4.91 (d, *J* = 14.5 Hz, 1H), 4.74 (d, *J* = 14.4 Hz, 1H), 3.49 (d, *J* = 12.8 Hz, 1H), 3.13 (d, *J* = 12.8 Hz, 1H), 2.93 (d, *J* = 13.0 Hz, 1H), 2.59 (d, *J* = 13.0 Hz, 1H), 1.22 (s, 3H); **<sup>13</sup>C NMR** (101 MHz, CDCl<sub>3</sub>) δ 164.2, 143.4, 142.4, 136.7, 131.6, 131.3, 131.1, 128.9, 128.7 (two peaks overlap), 128.0, 127.7, 127.3, 124.8, 118.7, 110.3, 55.8, 50.7, 45.7, 38.0, 21.8. **HRMS** (EI): *m/z*: [M]<sup>+</sup> Calcd for C<sub>25</sub>H<sub>22</sub>N<sub>2</sub>O: 366.1732, found 366.1732. HPLC (AD-H, 2-propanol /*n*-hexane = 20/80, flow rate = 1.0 mL/min, λ = 254 nm) t<sub>R</sub> = 18.1 min (major), 38.5 min (minor). [α]<sub>D</sub><sup>20</sup> = -227.2 (*c* = 0.5, CHCl<sub>3</sub>).

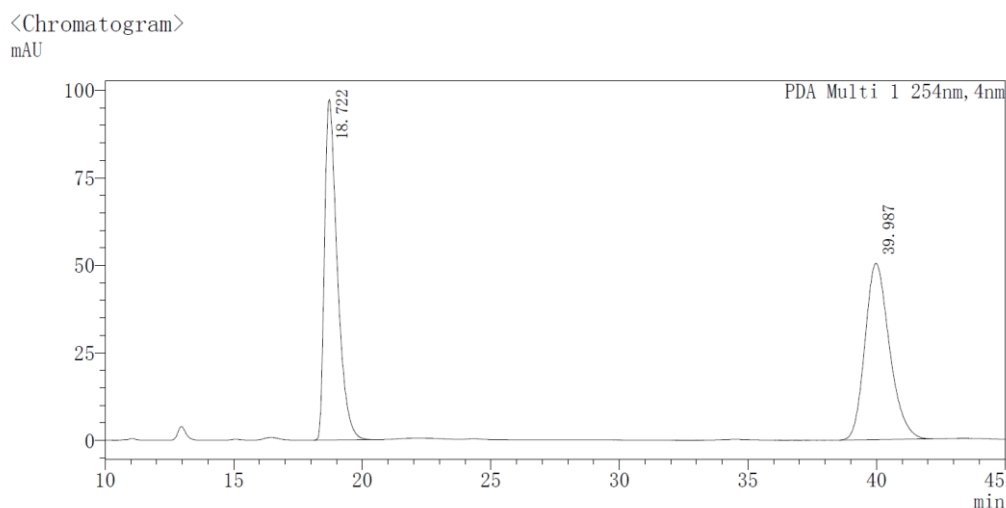

<Peak Table>

PDA Ch1 254nm

| No.   | Ret. Time (min) | Height (mAU) | Height% | Area (mAU*min) | Area%   |
|-------|-----------------|--------------|---------|----------------|---------|
| 1     | 18.722          | 97200        | 65.871  | 3363048        | 50.140  |
| 2     | 39.987          | 50360        | 34.129  | 3344283        | 49.860  |
| Total |                 | 147560       | 100.000 | 6707331        | 100.000 |



<Chromatogram>  
mAU

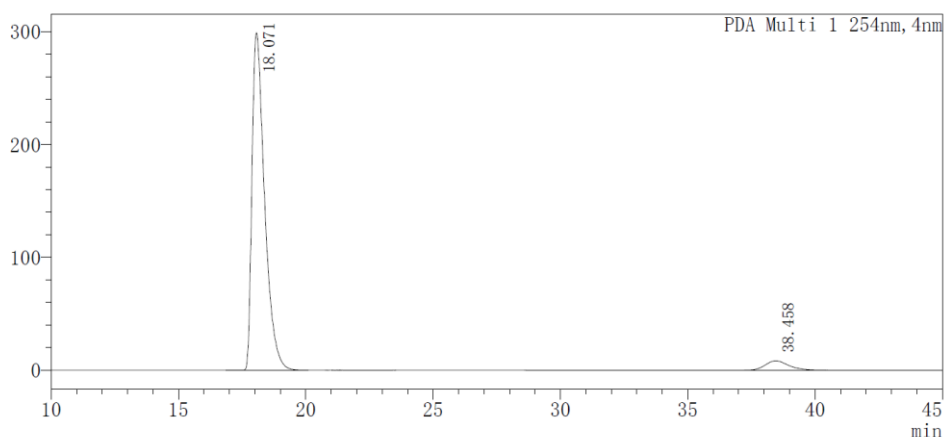

<Peak Table>

PDA Ch1 254nm

| No.   | Ret. Time (min) | Height (mAU) | Height% | Area (mAU*min) | Area%   |
|-------|-----------------|--------------|---------|----------------|---------|
| 1     | 18.071          | 298984       | 97.289  | 10283446       | 95.091  |
| 2     | 38.458          | 8330         | 2.711   | 530826         | 4.909   |
| Total |                 | 307314       | 100.000 | 10814273       | 100.000 |

Compound Label  
Compound 1

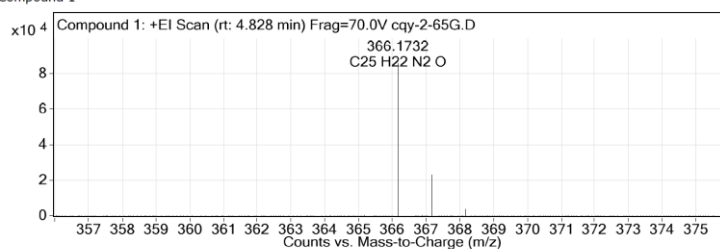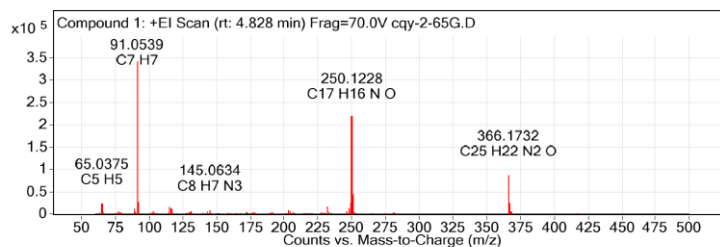

| m/z      | Calc m/z | Diff(ppm) | mDa   | Abund    | Formula      | Ion | Height% |
|----------|----------|-----------|-------|----------|--------------|-----|---------|
| 366.1732 | 366.1727 | -1.59     | -0.58 | 85556    | C25 H22 N2 O | M+  | 25.02   |
| 367.1761 | 367.1759 | -0.56     | -0.21 | 23012.42 | C25 H22 N2 O | M+  | 6.73    |
| 368.1765 | 368.179  | 6.66      | 2.45  | 3843.71  | C25 H22 N2 O | M+  | 1.12    |

### Ethyl (*R*)-4-((2-benzyl-4-methyl-1-oxo-1,2,3,4-tetrahydroisoquinolin-4-yl)methyl)benzoate (**3j**)

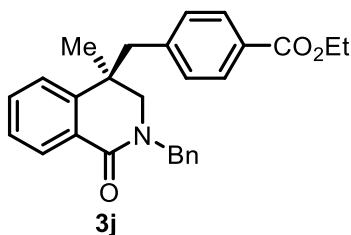

Prepared according to typical procedure from **2j** (82.8 mg, 0.3 mmol), *N*-allyl carboxamide **1a** (78.2 mg, 0.2 mmol), after a flash column chromatography (hexanes:

EA = 20:1-10:1) afforded the product **3j** as a yellow oil (71.7 mg, 87% yield) with 89% *ee*. **<sup>1</sup>H NMR** (400 MHz, CDCl<sub>3</sub>) δ 8.28-8.25 (m, 1H), 7.85-7.82 (m, 2H), 7.42-7.28 (m, 7H), 6.86-6.83 (m, 1H), 6.73-6.70 (m, 2H), 4.89-4.78 (m, 2H), 4.37 (q, *J* = 7.1 Hz, 2H), 3.44 (d, *J* = 12.7 Hz, 1H), 3.13 (d, *J* = 12.7 Hz, 1H), 2.93 (d, *J* = 13.0 Hz, 1H), 2.64 (d, *J* = 13.0 Hz, 1H), 1.40 (t, *J* = 7.2 Hz, 3H), 1.22 (s, 3H); **<sup>13</sup>C NMR** (101 MHz, CDCl<sub>3</sub>) δ 166.4, 164.3, 144.1, 142.1, 136.7, 131.6, 130.4, 128.9, 128.8, 128.6 (two peaks overlap), 128.6, 128.0, 127.6, 127.1, 124.8, 60.8, 55.8, 50.8, 45.7, 38.0, 21.9, 14.2. **HRMS** (EI): *m/z*: [M]<sup>+</sup> Calcd for C<sub>27</sub>H<sub>27</sub>NO<sub>3</sub>: 413.1991, found 413.1990. HPLC (AD-H, 2-propanol /n-hexane = 15/85, flow rate = 1.0 mL/min, λ = 254 nm) t<sub>R</sub> = 15.0 min (major), 24.8 min (minor). [α]<sub>D</sub><sup>20</sup> = -184.0 (*c* = 0.5, CHCl<sub>3</sub>).

<Chromatogram>

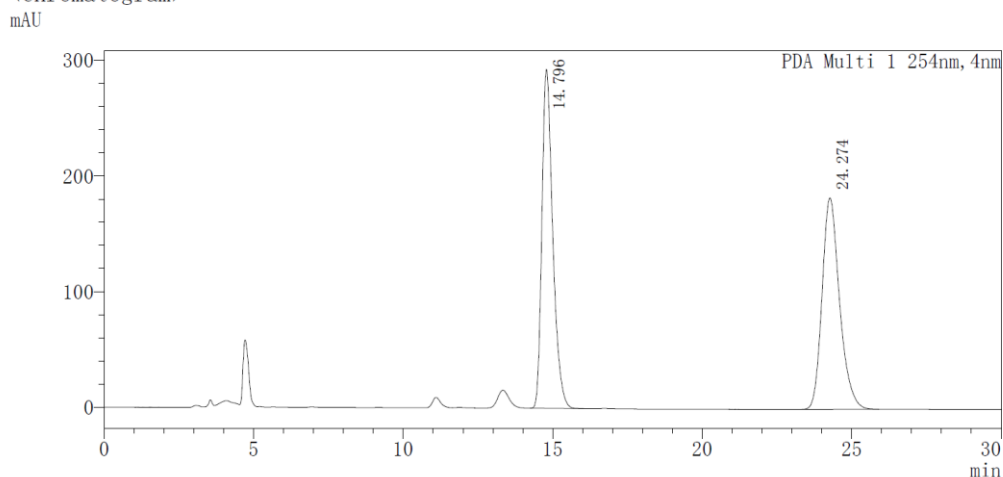

<Peak Table>

PDA Ch1 254nm

| No.   | Ret. Time (min) | Height (mAU) | Height% | Area (mAU*min) | Area%   |
|-------|-----------------|--------------|---------|----------------|---------|
| 1     | 14.796          | 293005       | 61.589  | 7404465        | 49.952  |
| 2     | 24.274          | 182736       | 38.411  | 7418612        | 50.048  |
| Total |                 | 475740       | 100.000 | 14823077       | 100.000 |

<Chromatogram>

mAU

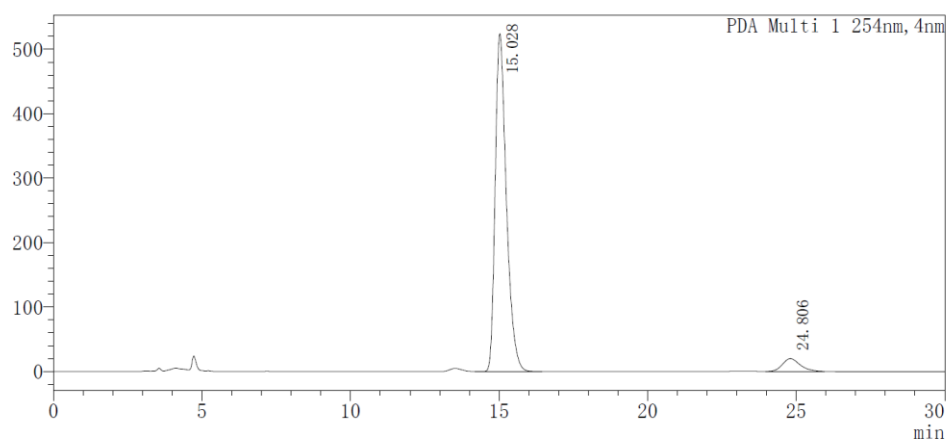

<Peak Table>

PDA Ch1 254nm

| No.   | Ret. Time (min) | Height (mAU) | Height% | Area (mAU*min) | Area%   |
|-------|-----------------|--------------|---------|----------------|---------|
| 1     | 15.028          | 523755       | 96.373  | 13694295       | 94.406  |
| 2     | 24.806          | 19711        | 3.627   | 811390         | 5.594   |
| Total |                 | 543465       | 100.000 | 14505685       | 100.000 |

Compound Label

Compound 1

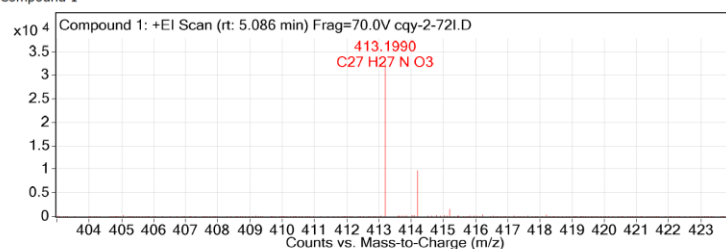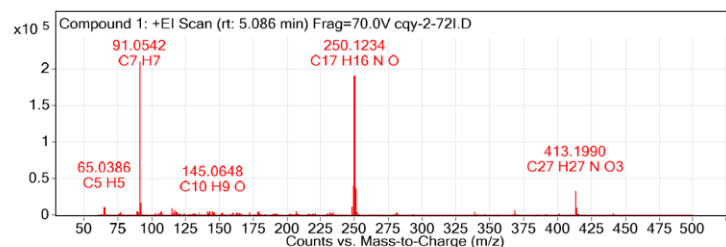

| m/z      | Calc m/z | Diff(ppm) | mDa   | Abund    | Formula      | Ion | Height% |
|----------|----------|-----------|-------|----------|--------------|-----|---------|
| 413.199  | 413.1985 | -1.11     | -0.46 | 32427.43 | C27 H27 N O3 | M+  | 15.53   |
| 414.2035 | 414.2019 | -3.97     | -1.64 | 9754.09  | C27 H27 N O3 | M+  | 4.67    |
| 415.2023 | 415.2049 | 6.23      | 2.59  | 1573.13  | C27 H27 N O3 | M+  | 0.75    |

**(R)-2-benzyl-4-methyl-4-(3-methylbenzyl)-3,4-dihydroisoquinolin-1(2H)-one (3k)**

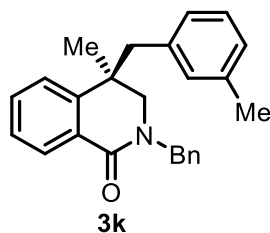

Prepared according to typical procedure from **2k** (17.5 mg, 0.3 mmol), *N*-allyl carboxamide **1a** (78.2 mg, 0.2 mmol), after a flash column chromatography (hexanes:

EA = 20:1-10:1) afforded the product **3k** as a yellow oil (56.0 mg, 79% yield) with 92% *ee*. **<sup>1</sup>H NMR** (400 MHz, CDCl<sub>3</sub>) δ 8.28 (dd, *J* = 5.6, 3.3 Hz, 1H), 7.46-7.26 (m, 7H), 7.13-7.01 (m, 2H), 6.98-6.90 (m, 1H), 6.56 (d, *J* = 7.6 Hz, 2H), 5.02 (d, *J* = 14.4 Hz, 1H), 4.72 (d, *J* = 14.4 Hz, 1H), 3.41 (d, *J* = 12.6 Hz, 1H), 3.14 (d, *J* = 12.6 Hz, 1H), 2.85 (d, *J* = 13.2 Hz, 1H), 2.62 (d, *J* = 13.2 Hz, 1H), 2.26 (s, 3H), 1.24 (s, 3H); **<sup>13</sup>C NMR** (101 MHz, CDCl<sub>3</sub>) δ 164.4, 145.0, 137.2, 136.9, 136.7, 131.5, 131.4, 128.7, 128.6, 128.6, 128.1, 127.6, 127.5, 127.5, 127.1, 126.9, 124.9, 55.6, 50.9, 45.8, 37.9, 22.0, 21.3. **HRMS** (EI): *m/z*: [M]<sup>+</sup> Calcd for C<sub>25</sub>H<sub>25</sub>NO: 355.1936, found 355.1935. **HPLC** (AD-H, 2-propanol /n-hexane = 10/90, flow rate = 1.0 mL/min, λ = 254 nm) tR = 12.1 min (major), 32.1 min (minor). [α]<sub>D</sub><sup>20</sup> = -158.9 (*c* = 0.5, CHCl<sub>3</sub>).

<Chromatogram>  
mAU

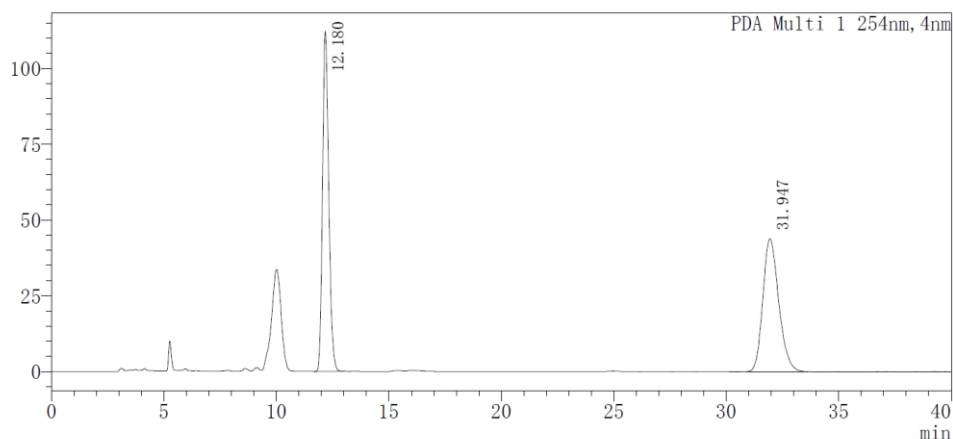

<Peak Table>

PDA Ch1 254nm

| No.   | Ret. Time (min) | Height (mAU) | Height% | Area (mAU*min) | Area%   |
|-------|-----------------|--------------|---------|----------------|---------|
| 1     | 12.180          | 112087       | 71.869  | 2156377        | 50.042  |
| 2     | 31.947          | 43873        | 28.131  | 2152736        | 49.958  |
| Total |                 | 155959       | 100.000 | 4309112        | 100.000 |

<Chromatogram>  
mAU

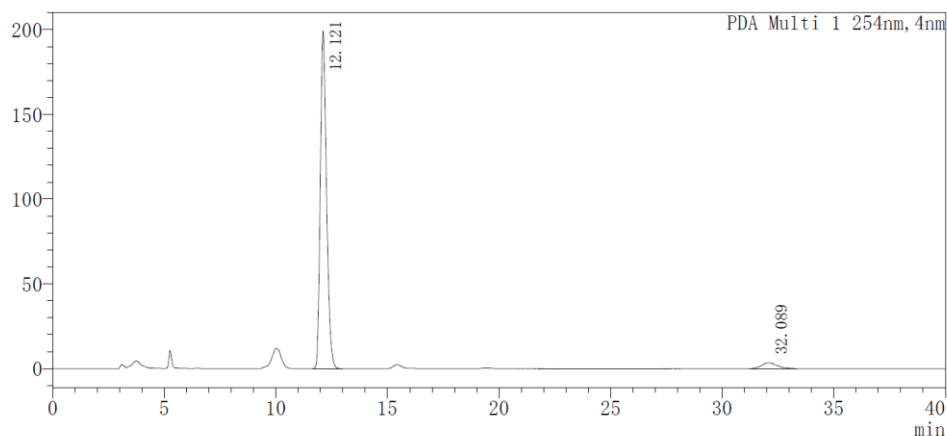

<Peak Table>

PDA Ch1 254nm

| No.   | Ret. Time (min) | Height (mAU) | Height% | Area (mAU*min) | Area%   |
|-------|-----------------|--------------|---------|----------------|---------|
| 1     | 12.121          | 199092       | 98.353  | 3873148        | 96.006  |
| 2     | 32.089          | 3333         | 1.647   | 161149         | 3.994   |
| Total |                 | 202425       | 100.000 | 4034297        | 100.000 |

Compound Label  
Compound 1

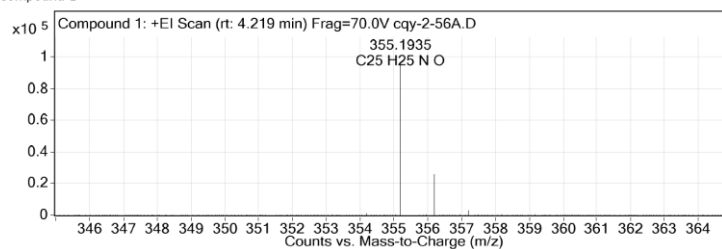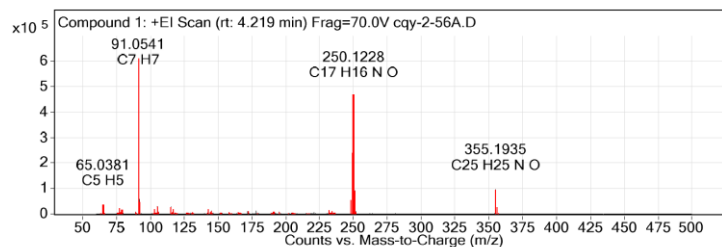

| m/z      | Calc m/z | Diff(ppm) | mDa   | Abund    | Formula                             | Ion | Height% |
|----------|----------|-----------|-------|----------|-------------------------------------|-----|---------|
| 355.1935 | 355.1931 | -1.09     | -0.39 | 96580.77 | C <sub>25</sub> H <sub>25</sub> N O | M+  | 16.05   |
| 356.1961 | 356.1964 | 0.89      | 0.32  | 25689.65 | C <sub>25</sub> H <sub>25</sub> N O | M+  | 4.27    |
| 357.1969 | 357.1995 | 7.34      | 2.62  | 2968.64  | C <sub>25</sub> H <sub>25</sub> N O | M+  | 0.49    |

**(R)-2-benzyl-4-(3-methoxybenzyl)-4-methyl-3,4-dihydroisoquinolin-1(2H)-one (3I)**

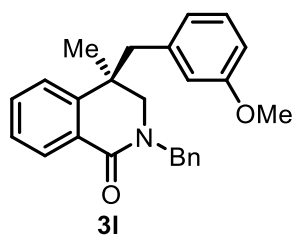

Prepared according to typical procedure from **2I** (70.2 mg, 0.3 mmol), *N*-allyl carboxamide **1a** (78.2 mg, 0.2 mmol), after a flash column chromatography (hexanes:

EA = 20:1-10:1) afforded the product **3l** as a yellow oil (50.5 mg, 68% yield) with 94% *ee*. **<sup>1</sup>H NMR** (400 MHz, CDCl<sub>3</sub>) δ 8.30-8.26 (m, 1H), 7.43-7.28 (m, 7H), 7.11 (t, *J* = 7.9 Hz, 1H), 6.93-6.90 (m, 1H), 6.76 (dd, *J* = 8.2, 2.6 Hz, 1H), 6.37 (d, *J* = 7.5 Hz, 1H), 6.22 (t, *J* = 2.0 Hz, 1H), 5.02 (d, *J* = 14.4 Hz, 1H), 4.71 (d, *J* = 14.4 Hz, 1H), 3.66 (s, 3H), 3.43 (d, *J* = 12.6 Hz, 1H), 3.15 (d, *J* = 12.7 Hz, 1H), 2.89 (d, *J* = 13.2 Hz, 1H), 2.60 (d, *J* = 13.2 Hz, 1H), 1.25 (s, 3H); **<sup>13</sup>C NMR** (101 MHz, CDCl<sub>3</sub>) δ 164.4, 158.9, 144.7, 138.3, 136.8, 131.5, 128.7, 128.6 (two peaks overlap), 128.5, 128.1, 127.5, 126.9, 125.0, 122.9, 115.8, 112.2, 55.9, 55.0, 50.8, 45.9, 38.0, 22.0. **HRMS** (EI): *m/z*: [M]<sup>+</sup> Calcd for C<sub>25</sub>H<sub>25</sub>NO<sub>2</sub>: 371.1885, found 371.1878. HPLC (AD-H, 2-propanol /n-hexane = 10/90, flow rate = 1.0 mL/min, λ = 254 nm) t<sub>R</sub> = 16.9 min (major), 34.4 min (minor). [α]<sub>D</sub><sup>20</sup> = -155.1 (*c* = 0.5, CHCl<sub>3</sub>).

<Chromatogram>

mAU

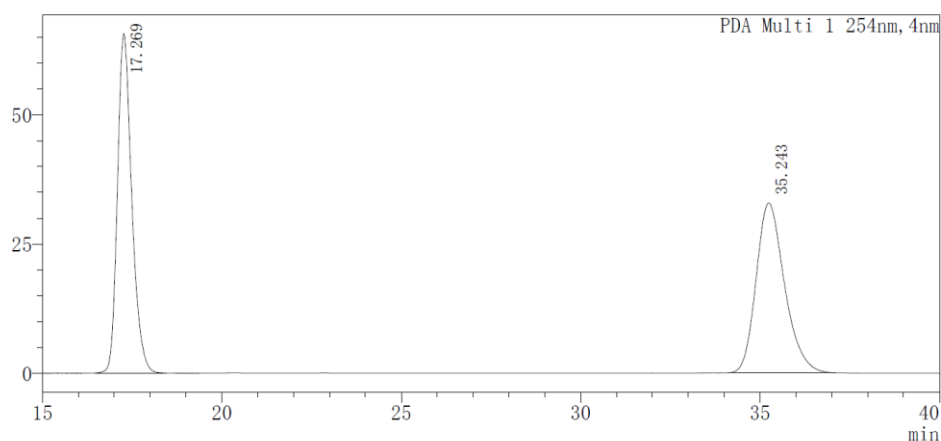

<Peak Table>

PDA Ch1 254nm

| No.   | Ret. Time(min) | Height (mAU) | Height% | Area (mAU*min) | Area%   |
|-------|----------------|--------------|---------|----------------|---------|
| 1     | 17.269         | 65690        | 66.669  | 1824687        | 50.225  |
| 2     | 35.243         | 32842        | 33.331  | 1808349        | 49.775  |
| Total |                | 98532        | 100.000 | 3633035        | 100.000 |

<Chromatogram>

mAU

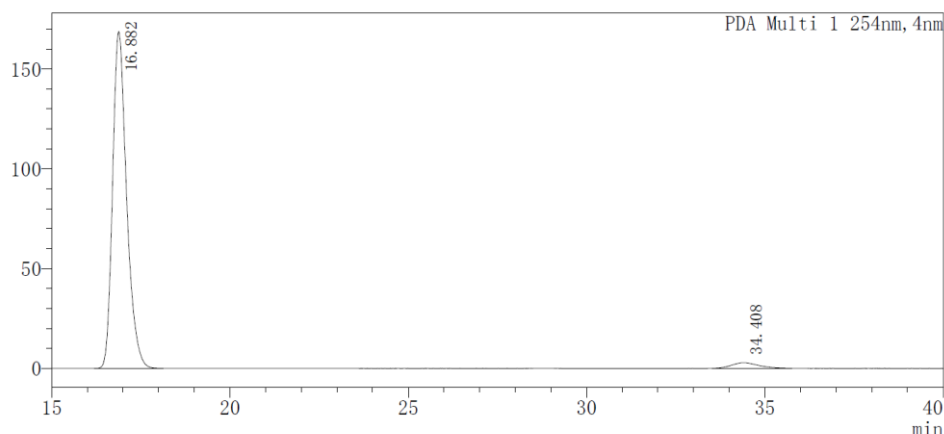

<Peak Table>

PDA Ch1 254nm

| No.   | Ret. Time (min) | Height (mAU) | Height% | Area (mAU*min) | Area%   |
|-------|-----------------|--------------|---------|----------------|---------|
| 1     | 16.882          | 168702       | 98.383  | 4603359        | 96.946  |
| 2     | 34.408          | 2772         | 1.617   | 145037         | 3.054   |
| Total |                 | 171474       | 100.000 | 4748396        | 100.000 |

**(*R*)-4-([1,1'-biphenyl]-3-ylmethyl)-2-benzyl-4-methyl-3,4-dihydroisoquinolin-1(2H)-one (3m)**

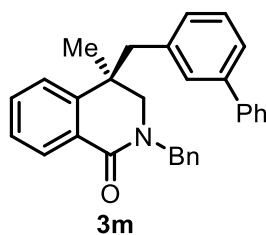

Prepared according to typical procedure from **2m** (84.1 mg, 0.3 mmol), *N*-allyl carboxamide **1a** (78.2 mg, 0.2 mmol), after a flash column chromatography (hexanes: EA = 20:1-10:1) afforded the product **3m** as a yellow oil (70.8 mg, 85% yield) with 91% *ee*. **<sup>1</sup>H NMR** (400 MHz, CDCl<sub>3</sub>) δ 8.35-8.33 (m, 1H), 7.48-7.28 (m, 14H), 6.96-6.91 (m, 2H), 6.75-6.72 (m, 1H), 4.99 (d, *J* = 14.5 Hz, 1H), 4.78 (d, *J* = 14.4 Hz, 1H), 3.48 (d, *J* = 12.7 Hz, 1H), 3.21 (d, *J* = 12.6 Hz, 1H), 3.01 (d, *J* = 13.2 Hz, 1H), 2.69 (d, *J* = 13.2 Hz, 1H), 1.30 (s, 3H); **<sup>13</sup>C NMR** (101 MHz, CDCl<sub>3</sub>) δ 164.4, 144.5, 140.8, 140.5, 137.2, 136.8, 131.5, 129.4, 129.3, 128.8, 128.6 (two peaks overlap), 128.6, 128.1, 128.1, 127.5, 127.2, 126.9 (two peaks overlap), 125.2, 125.0, 55.9, 50.8, 45.8, 38.0, 22.0. **HRMS** (EI): *m/z*: [M]<sup>+</sup> Calcd for C<sub>30</sub>H<sub>27</sub>NO: 417.2093, found 417.2090. HPLC (AD-H, 2-propanol /n-hexane = 10/90, flow rate = 1.0 mL/min, λ = 254 nm) t<sub>R</sub> = 16.7 min (major), 28.9 min (minor). [α]<sub>D</sub><sup>20</sup> = -158.4 (*c* = 0.5, CHCl<sub>3</sub>).

<Chromatogram>

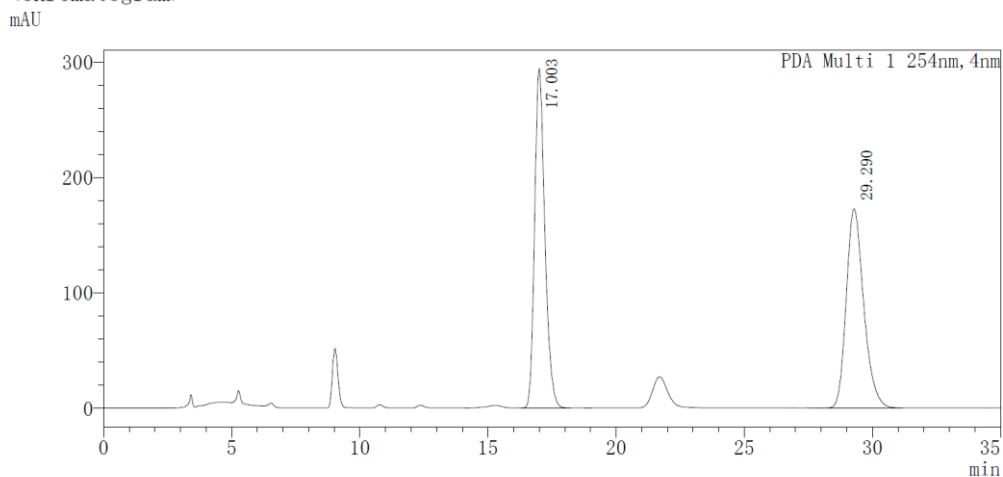

<Peak Table>

PDA Ch1 254nm

| No.   | Ret. Time (min) | Height (mAU) | Height% | Area (mAU*min) | Area%   |
|-------|-----------------|--------------|---------|----------------|---------|
| 1     | 17.003          | 294223       | 63.003  | 8191520        | 49.991  |
| 2     | 29.290          | 172776       | 36.997  | 8194623        | 50.009  |
| Total |                 | 467000       | 100.000 | 16386143       | 100.000 |

<Chromatogram>

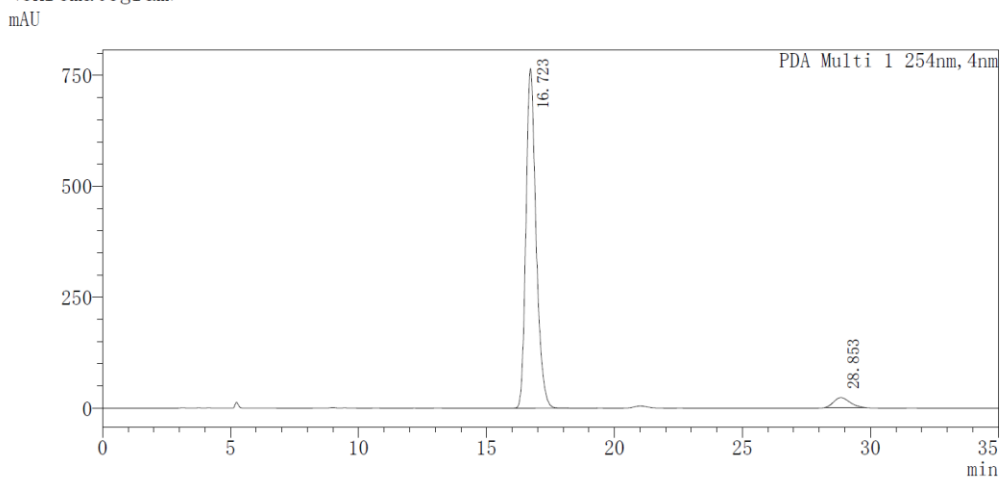

<Peak Table>

PDA Ch1 254nm

| No.   | Ret. Time (min) | Height (mAU) | Height% | Area (mAU*min) | Area%   |
|-------|-----------------|--------------|---------|----------------|---------|
| 1     | 16.723          | 765007       | 97.145  | 21059720       | 95.584  |
| 2     | 28.853          | 22482        | 2.855   | 973052         | 4.416   |
| Total |                 | 787489       | 100.000 | 22032772       | 100.000 |

**(*R*)-3-((2-benzyl-4-methyl-1-oxo-1,2,3,4-tetrahydroisoquinolin-4-yl)methyl) benzonitrile (3n)**

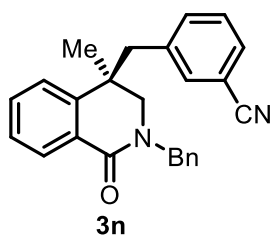



Prepared according to typical procedure from **2n** (68.7 mg, 0.3 mmol), *N*-allyl carboxamide **1a** (78.2 mg, 0.2 mmol), after a flash column chromatography (hexanes: EA = 20:1-10:1) afforded the product **3n** as a yellow oil (59.6 mg, 81% yield) with 87% *ee*. **<sup>1</sup>H NMR** (400 MHz, CDCl<sub>3</sub>) δ 8.27 (dd, *J* = 7.5, 1.7 Hz, 1H), 7.48-7.28 (m, 8H), 7.21 (t, *J* = 7.7 Hz, 1H), 6.93 (t, *J* = 1.7 Hz, 1H), 6.77-6.71 (m, 2H), 4.89 (d, *J* = 14.4 Hz, 1H), 4.77 (d, *J* = 14.4 Hz, 1H), 3.50 (d, *J* = 12.8 Hz, 1H), 3.13 (d, *J* = 12.7 Hz, 1H), 2.91 (d, *J* = 13.2 Hz, 1H), 2.55 (d, *J* = 13.2 Hz, 1H), 1.21 (s, 3H); **<sup>13</sup>C NMR** (101 MHz, CDCl<sub>3</sub>) δ 164.1, 143.3, 138.3, 136.7, 134.8, 133.6, 131.6, 130.2, 128.9, 128.7, 128.6, 128.4, 128.0, 127.7, 127.4, 124.8, 118.6, 111.7, 55.8, 50.6, 45.2, 37.8, 21.7. **HRMS** (EI): *m/z*: [M]<sup>+</sup> Calcd for C<sub>25</sub>H<sub>22</sub>N<sub>2</sub>O: 366.1732, found 366.1729. HPLC (AD-H, 2-propanol /n-hexane = 15/85, flow rate = 1.0 mL/min, λ = 254 nm) t<sub>R</sub> = 22.1 min (major), 43.6 min (minor). [α]<sub>D</sub><sup>20</sup> = -175.9 (*c* = 0.5, CHCl<sub>3</sub>).

<Chromatogram>  
mAU

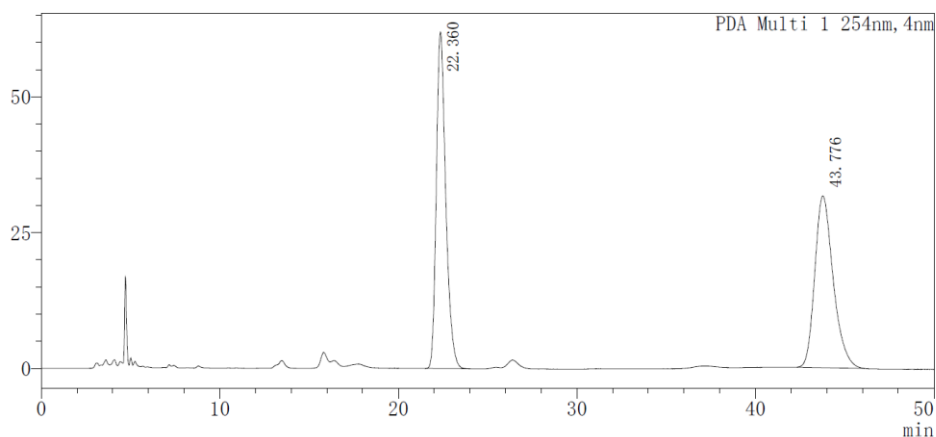

<Peak Table>

PDA Ch1 254nm

| No.   | Ret. Time (min) | Height (mAU) | Height% | Area (mAU*min) | Area%   |
|-------|-----------------|--------------|---------|----------------|---------|
| 1     | 22.360          | 61969        | 66.226  | 2272582        | 50.133  |
| 2     | 43.776          | 31603        | 33.774  | 2260526        | 49.867  |
| Total |                 | 93572        | 100.000 | 4533108        | 100.000 |

&lt;Chromatogram&gt;

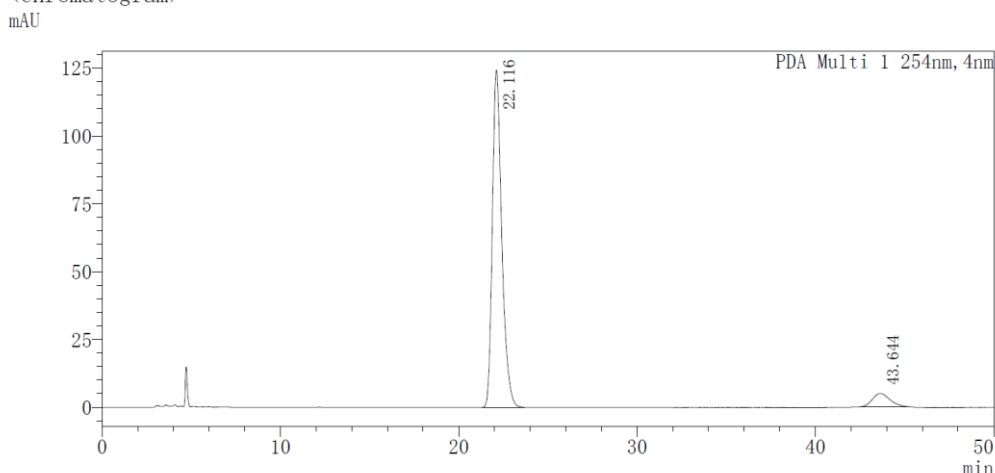

&lt;Peak Table&gt;

PDA Ch1 254nm

| No.   | Ret. Time (min) | Height (mAU) | Height% | Area (mAU*min) | Area%   |
|-------|-----------------|--------------|---------|----------------|---------|
| 1     | 22.116          | 124379       | 96.225  | 4566780        | 93.337  |
| 2     | 43.644          | 4880         | 3.775   | 326014         | 6.663   |
| Total |                 | 129259       | 100.000 | 4892794        | 100.000 |

**(R)-2-benzyl-4-(2-methoxybenzyl)-4-methyl-3,4-dihydroisoquinolin-1(2H)-one(3o)**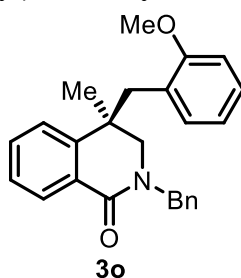

Prepared according to typical procedure from **2o** (70.2 mg, 0.3 mmol), *N*-allyl carboxamide **1a** (78.2 mg, 0.2 mmol), after a flash column chromatography (hexanes: EA = 20:1-10:1) afforded the product **3o** as a yellow oil (63.6 mg, 86% yield) with 81% *ee*. <sup>1</sup>H NMR (400 MHz, CDCl<sub>3</sub>) δ 8.28-8.23 (m, 1H), 7.42-7.28 (m, 7H), 7.21-7.16 (m, 1H), 6.96-6.91 (m, 1H), 6.80-6.74 (m, 2H), 6.62-6.59 (m, 1H), 4.99 (d, *J* = 14.5 Hz, 1H), 4.73 (d, *J* = 14.5 Hz, 1H), 3.56 (s, 3H), 3.41 (d, *J* = 12.6 Hz, 1H), 3.25 (d, *J* = 12.6 Hz, 1H), 3.14 (d, *J* = 13.0 Hz, 1H), 2.64 (d, *J* = 13.0 Hz, 1H), 1.24 (s, 3H); <sup>13</sup>C NMR (101 MHz, CDCl<sub>3</sub>) δ 164.4, 157.8, 145.1, 137.0, 132.1, 131.2, 128.5 (two peaks overlap), 128.4, 128.3, 127.7, 127.4, 126.5, 125.5, 124.7, 119.6, 110.0, 56.2, 54.8, 50.8, 38.5, 38.3, 22.3. HRMS (EI): *m/z*: [M]<sup>+</sup> Calcd for C<sub>25</sub>H<sub>25</sub>NO<sub>2</sub>: 371.1885, found 371.1879. HPLC (AD-H, 2-propanol /*n*-hexane = 10/90, flow rate = 1.0 mL/min, λ = 254 nm) t<sub>R</sub> = 17.4 min (major), 19.8 min (minor). [α]<sub>D</sub><sup>20</sup> = -124.6 (*c* = 0.5, CHCl<sub>3</sub>).

<Chromatogram>

mAU

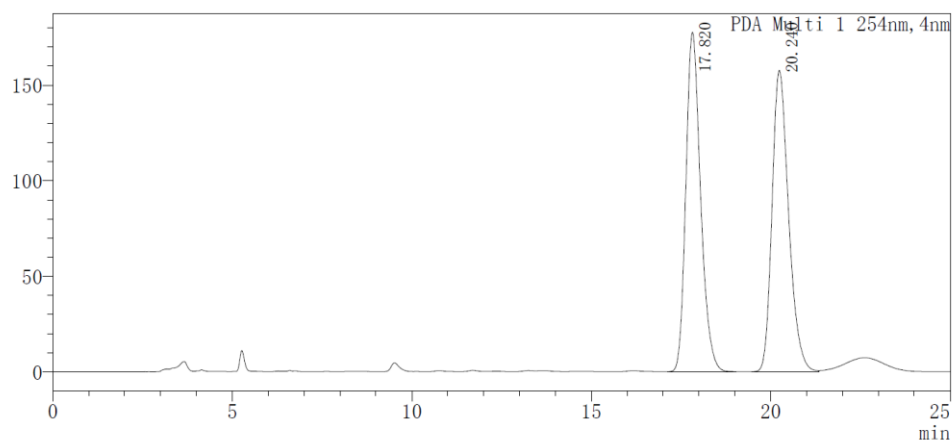

<Peak Table>

PDA Ch1 254nm

| No.   | Ret. Time (min) | Height (mAU) | Height% | Area (mAU*min) | Area%   |
|-------|-----------------|--------------|---------|----------------|---------|
| 1     | 17.820          | 177581       | 52.974  | 5066087        | 49.976  |
| 2     | 20.240          | 157644       | 47.026  | 5070919        | 50.024  |
| Total |                 | 335225       | 100.000 | 10137007       | 100.000 |

<Chromatogram>

mAU

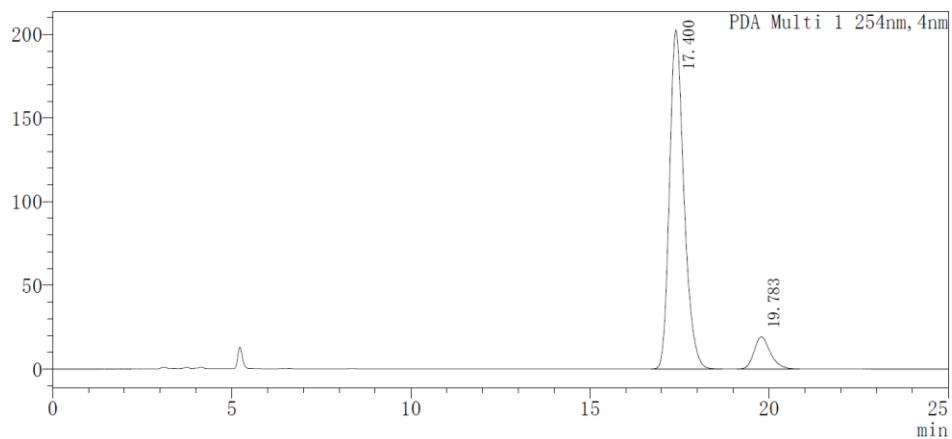

<Peak Table>

PDA Ch1 254nm

| No.   | Ret. Time (min) | Height (mAU) | Height% | Area (mAU*min) | Area%   |
|-------|-----------------|--------------|---------|----------------|---------|
| 1     | 17.400          | 202480       | 91.362  | 5689154        | 90.456  |
| 2     | 19.783          | 19145        | 8.638   | 600235         | 9.544   |
| Total |                 | 221625       | 100.000 | 6289389        | 100.000 |

**(R)-4-(2-aminobenzyl)-2-benzyl-4-methyl-3,4-dihydroisoquinolin-1(2H)-one (3p)**

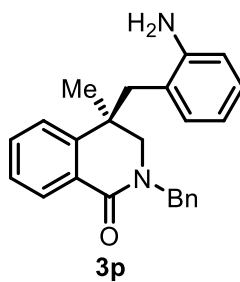

Prepared according to typical procedure from **2p** (65.7 mg, 0.3 mmol), *N*-allyl carboxamide **1a** (78.2 mg, 0.2 mmol), after a flash column chromatography (hexanes: EA = 15:1-5:1) afforded the product **3p** as a yellow oil (55.2 mg, 77% yield) with 90% *ee*. **<sup>1</sup>H NMR** (400 MHz, CDCl<sub>3</sub>) δ 8.27-8.25 (m, 1H), 7.44-7.27 (m, 7H), 7.05-7.00 (m, 1H), 6.96-6.93 (m, 1H), 6.70-6.64 (m, 2H), 6.55 (d, *J* = 7.9 Hz, 1H), 4.97 (d, *J* = 14.4 Hz, 1H), 4.78 (d, *J* = 14.5 Hz, 1H), 3.51 (d, *J* = 12.7 Hz, 1H), 3.24 (d, *J* = 12.7 Hz, 1H), 2.94 (d, *J* = 14.0 Hz, 1H), 2.79 (s, 2H), 2.46 (d, *J* = 14.1 Hz, 1H), 1.32 (s, 3H); **<sup>13</sup>C NMR** (101 MHz, CDCl<sub>3</sub>) δ 164.3, 145.4, 144.6, 136.8, 132.8, 132.0, 128.9, 128.7 (two peaks overlap), 128.0, 127.8, 127.7, 127.3, 125.1, 121.5, 118.3, 116.3, 56.6, 51.0, 40.9, 38.4, 22.5. **HRMS** (EI): *m/z*: [M]<sup>+</sup> Calcd for C<sub>24</sub>H<sub>24</sub>N<sub>2</sub>O: 356.1889, found 356.1884. **HPLC** (AD-H, 2-propanol /*n*-hexane = 20/80, flow rate = 1.0 mL/min, λ = 254 nm) *t*R = 20.7 min (major), 40.4 min (minor). [α]<sub>D</sub><sup>20</sup> = -109.4 (*c* = 0.5, CHCl<sub>3</sub>).

<Chromatogram>  
mAU

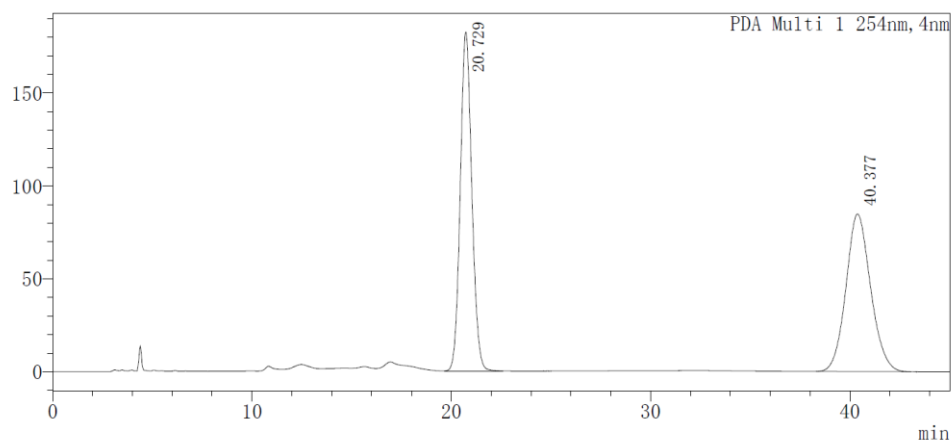

<Peak Table>

PDA Ch1 254nm

| No.   | Ret. Time (min) | Height (mAU) | Height% | Area (mAU*min) | Area%   |
|-------|-----------------|--------------|---------|----------------|---------|
| 1     | 20.729          | 182346       | 68.252  | 7345251        | 50.151  |
| 2     | 40.377          | 84820        | 31.748  | 7301082        | 49.849  |
| Total |                 | 267165       | 100.000 | 14646334       | 100.000 |

<Chromatogram>  
mAU

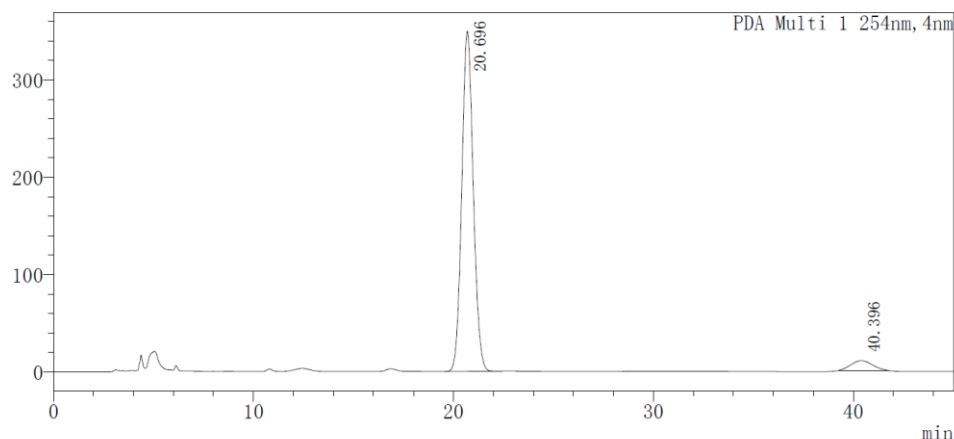

<Peak Table>

PDA Ch1 254nm

| No.   | Ret. Time (min) | Height (mAU) | Height% | Area (mAU*min) | Area%   |
|-------|-----------------|--------------|---------|----------------|---------|
| 1     | 20.696          | 349461       | 97.180  | 13961938       | 94.889  |
| 2     | 40.396          | 10140        | 2.820   | 752024         | 5.111   |
| Total |                 | 359601       | 100.000 | 14713963       | 100.000 |

**(*R*)-2-benzyl-4-(2,5-dimethoxybenzyl)-4-methyl-3,4-dihydroisoquinolin-1(2H)-one (3q)**

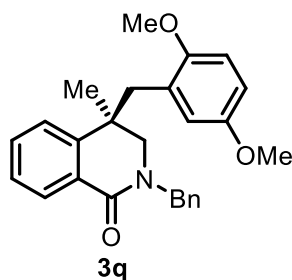

Prepared according to typical procedure from **2q** (79.2 mg, 0.3 mmol), *N*-allyl carboxamide **1a** (78.2 mg, 0.2 mmol), after a flash column chromatography (hexanes: EA = 20:1-10:1) afforded the product **3q** as a yellow oil (79.4 mg, 99% yield) with 82% *ee*. **<sup>1</sup>H NMR** (400 MHz, CDCl<sub>3</sub>) δ 8.27-8.23 (m, 1H), 7.41-7.28 (m, 7H), 6.93-6.88 (m, 1H), 6.73-6.68 (m, 2H), 6.14 (d, *J* = 2.7 Hz, 1H), 5.04 (d, *J* = 14.5 Hz, 1H), 4.68 (d, *J* = 14.5 Hz, 1H), 3.61 (s, 3H), 3.55 (s, 3H), 3.43 (d, *J* = 12.6 Hz, 1H), 3.25 (d, *J* = 12.6 Hz, 1H), 3.05 (d, *J* = 13.0 Hz, 1H), 2.66 (d, *J* = 13.0 Hz, 1H), 1.25 (s, 3H); **<sup>13</sup>C NMR** (101 MHz, CDCl<sub>3</sub>) δ 164.5, 152.6, 152.2, 145.0, 137.0, 131.3, 128.6, 128.6 (two peaks overlap), 128.5, 127.5, 126.7, 126.6, 125.1, 117.9, 112.6, 111.0, 56.7, 55.6, 55.5, 51.0, 38.8, 38.5, 22.4. **HRMS** (ED): *m/z*: [M]<sup>+</sup> Calcd for C<sub>26</sub>H<sub>27</sub>NO<sub>3</sub>: 401.1991, found 401.1991. HPLC (AD-H, 2-propanol /n-hexane = 10/90, flow rate = 1.0 mL/min, λ = 254 nm) tR = 20.1 min (major), 23.7 min (minor). [α]<sub>D</sub><sup>20</sup> = -109.5 (*c* = 0.5, CHCl<sub>3</sub>).

<Chromatogram>

mAU

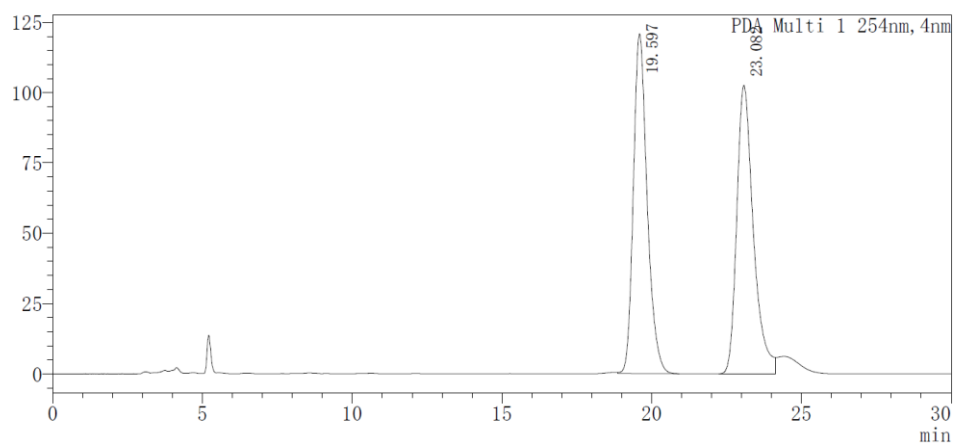

<Peak Table>

PDA Ch1 254nm

| No.   | Ret. Time (min) | Height (mAU) | Height% | Area (mAU*min) | Area%   |
|-------|-----------------|--------------|---------|----------------|---------|
| 1     | 19.597          | 120793       | 54.088  | 3871775        | 49.445  |
| 2     | 23.082          | 102532       | 45.912  | 3958719        | 50.555  |
| Total |                 | 223325       | 100.000 | 7830495        | 100.000 |

<Chromatogram>

mAU

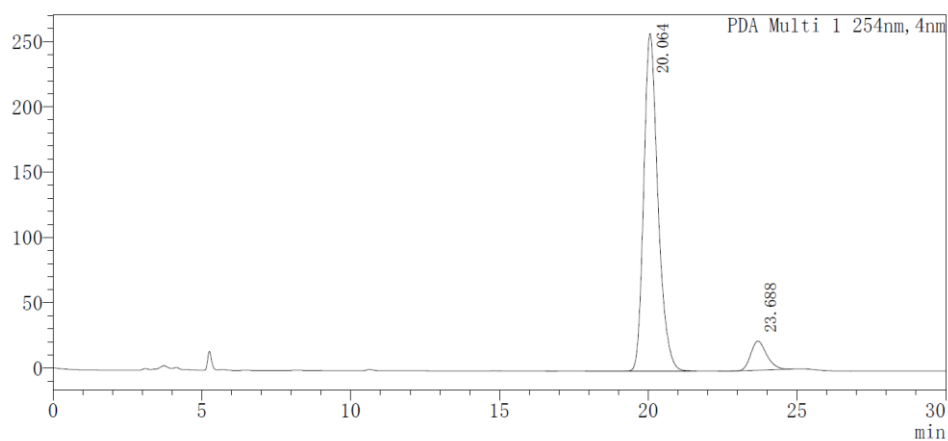

<Peak Table>

PDA Ch1 254nm

| No.   | Ret. Time (min) | Height (mAU) | Height% | Area (mAU*min) | Area%   |
|-------|-----------------|--------------|---------|----------------|---------|
| 1     | 20.064          | 258411       | 92.069  | 8559150        | 91.217  |
| 2     | 23.688          | 22259        | 7.931   | 824088         | 8.783   |
| Total |                 | 280670       | 100.000 | 9383237        | 100.000 |

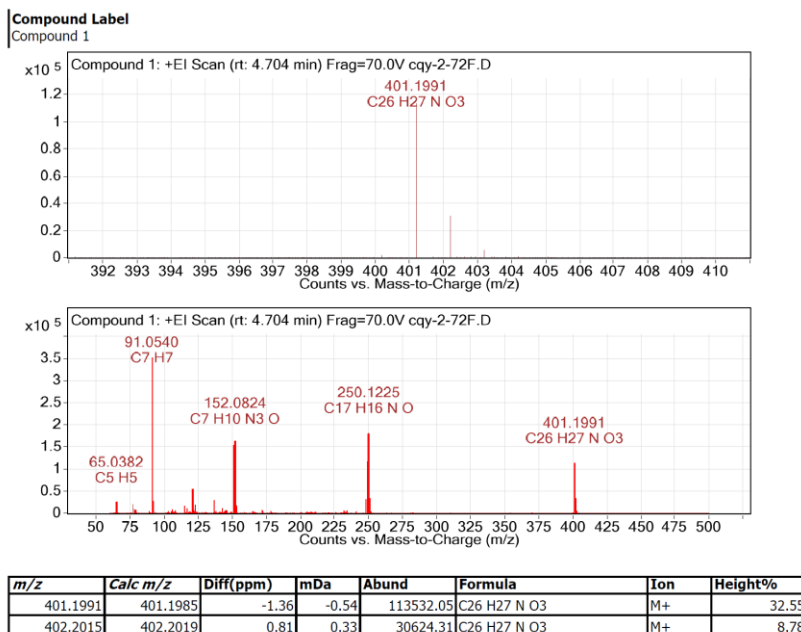

**(*R*)-2-benzyl-4-methyl-4-(naphthalen-2-ylmethyl)-3,4-dihydroisoquinolin-1(2H)-one (3r)**

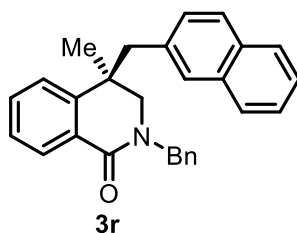

Prepared according to typical procedure from **2r** (76.2 mg, 0.3 mmol), *N*-allyl carboxamide **1a** (78.2 mg, 0.2 mmol), after a flash column chromatography (hexanes: EA = 20:1-10:1) afforded the product **3r** as a yellow oil (69.5 mg, 89% yield) with 90% *ee*. **<sup>1</sup>H NMR** (400 MHz, CDCl<sub>3</sub>) δ 8.34 (dd, *J* = 7.7, 1.6 Hz, 1H), 7.84-7.81 (m, 1H), 7.71-7.65 (m, 2H), 7.51-7.30 (m, 9H), 7.21 (d, *J* = 1.7 Hz, 1H), 6.90 (dd, *J* = 7.7, 1.3 Hz, 1H), 6.83 (dd, *J* = 8.4, 1.8 Hz, 1H), 5.01 (d, *J* = 14.5 Hz, 1H), 4.81 (d, *J* = 14.4 Hz, 1H), 3.46 (d, *J* = 12.6 Hz, 1H), 3.21 (d, *J* = 12.7 Hz, 1H), 3.07 (d, *J* = 13.2 Hz, 1H), 2.81 (d, *J* = 13.2 Hz, 1H), 1.29 (s, 3H); **<sup>13</sup>C NMR** (101 MHz, CDCl<sub>3</sub>) δ 164.5, 144.7, 136.9, 134.4, 132.9, 132.0, 131.6, 129.1, 128.9, 128.8, 128.6, 128.6, 128.1, 127.6, 127.5, 127.4, 127.0, 127.0, 125.9, 125.5, 124.9, 55.8, 50.9, 45.9, 38.2, 22.0. **HRMS** (EI): m/z: [M]<sup>+</sup> Calcd for C<sub>28</sub>H<sub>25</sub>NO: 391.1936, found 391.1932. HPLC (IC, 2-propanol /n-hexane = 10/90, flow rate = 1.0 mL/min, λ = 254 nm) tR = 32.9 min (major), 39.8 min (minor). [α]<sub>D</sub><sup>20</sup> = -213.3 (*c* = 0.5, CHCl<sub>3</sub>).

<Chromatogram>

mAU

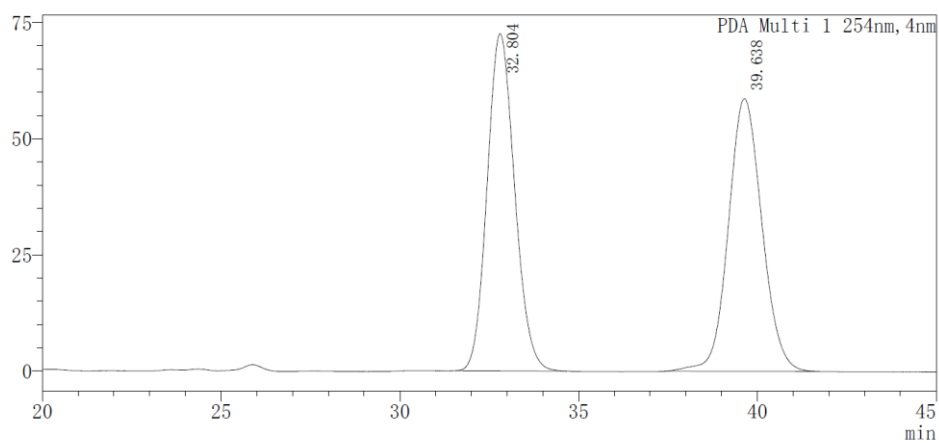

<Peak Table>

PDA Ch1 254nm

| No.   | Ret. Time (min) | Height (mAU) | Height% | Area (mAU*min) | Area%   |
|-------|-----------------|--------------|---------|----------------|---------|
| 1     | 32.804          | 72553        | 55.285  | 3890441        | 50.337  |
| 2     | 39.638          | 58681        | 44.715  | 3838282        | 49.663  |
| Total |                 | 131234       | 100.000 | 7728723        | 100.000 |

<Chromatogram>

mAU

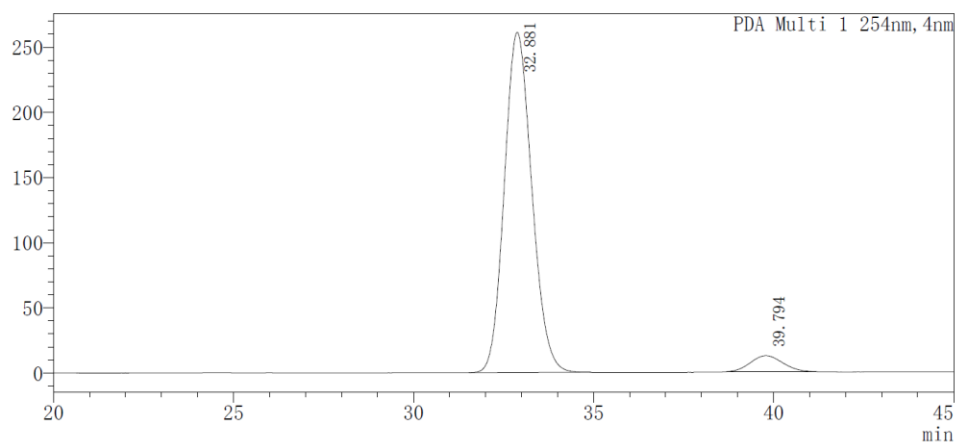

<Peak Table>

PDA Ch1 254nm

| No.   | Ret. Time (min) | Height (mAU) | Height% | Area (mAU*min) | Area%   |
|-------|-----------------|--------------|---------|----------------|---------|
| 1     | 32.881          | 261040       | 95.504  | 13849306       | 94.777  |
| 2     | 39.794          | 12289        | 4.496   | 763184         | 5.223   |
| Total |                 | 273329       | 100.000 | 14612490       | 100.000 |

**(R)-5-((2-benzyl-4-methyl-1-oxo-1,2,3,4-tetrahydroisoquinolin-4-yl)methyl)thiophene-2-carbaldehyde (3s)**



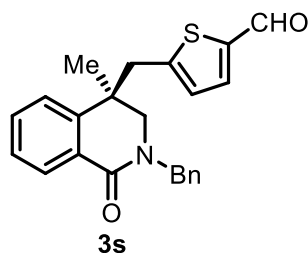

Prepared according to typical procedure from **2s** (71.4 mg, 0.3 mmol), *N*-allyl carboxamide **1a** (78.2 mg, 0.2 mmol), after a flash column chromatography (hexanes: EA = 20:1-10:1) afforded the product **3s** as a yellow oil (67.6 mg, 90% yield) with 83% *ee*. **<sup>1</sup>H NMR** (400 MHz, CDCl<sub>3</sub>) δ 9.77 (s, 1H), 8.28-8.20 (m, 1H), 7.50 (d, *J* = 3.8 Hz, 1H), 7.46-7.27 (m, 7H), 7.07-7.05 (m, 1H), 6.31 (d, *J* = 3.8 Hz, 1H), 4.89 (d, *J* = 14.5 Hz, 1H), 4.75 (d, *J* = 14.4 Hz, 1H), 3.43 (d, *J* = 12.9 Hz, 1H), 3.19 (d, *J* = 12.8 Hz, 1H), 3.06 (d, *J* = 14.4 Hz, 1H), 2.94 (d, *J* = 14.3 Hz, 1H), 1.32 (s, 3H); **<sup>13</sup>C NMR** (101 MHz, CDCl<sub>3</sub>) δ 182.4, 164.1, 149.9, 143.5, 142.6, 136.6, 136.3, 131.9, 128.9 (two peaks overlap), 128.6, 128.6, 127.9, 127.6, 127.4, 124.4, 55.0, 50.6, 40.3, 37.9, 22.3. **HRMS** (EI): *m/z*: [M]<sup>+</sup> Calcd for C<sub>23</sub>H<sub>21</sub>NO<sub>2</sub>S: 375.1293, found 375.1287. HPLC (AD-H, 2-propanol /n-hexane = 15/85, flow rate = 1.0 mL/min, λ = 254 nm) tR = 30.4 min (major), 42.7 min (minor). [α]<sub>D</sub><sup>20</sup> = -176.7 (*c* = 0.5, CHCl<sub>3</sub>).

<Chromatogram>  
mAU

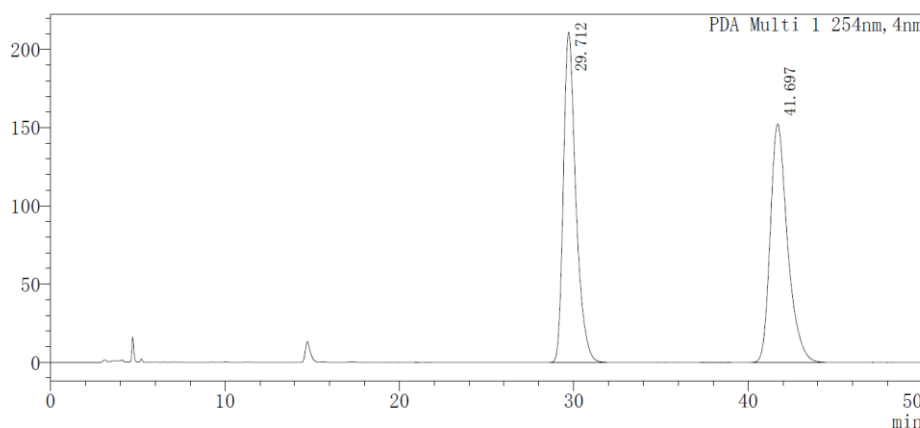

<Peak Table>

PDA Ch1 254nm

| No.   | Ret. Time (min) | Height (mAU) | Height% | Area (mAU*min) | Area%   |
|-------|-----------------|--------------|---------|----------------|---------|
| 1     | 29.712          | 210737       | 58.059  | 10478653       | 50.028  |
| 2     | 41.697          | 152234       | 41.941  | 10466794       | 49.972  |
| Total |                 | 362971       | 100.000 | 20945447       | 100.000 |

<Chromatogram>  
mAU

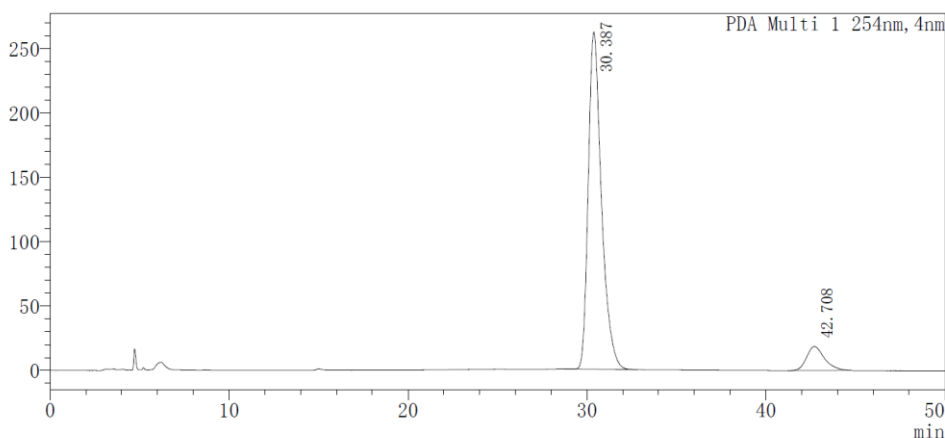

<Peak Table>

PDA Ch1 254nm

| No.   | Ret. Time (min) | Height (mAU) | Height% | Area (mAU*min) | Area%   |
|-------|-----------------|--------------|---------|----------------|---------|
| 1     | 30.387          | 261902       | 93.365  | 13445602       | 91.250  |
| 2     | 42.708          | 18612        | 6.635   | 1289364        | 8.750   |
| Total |                 | 280514       | 100.000 | 14734966       | 100.000 |

**(*R*)-2-benzyl-4-methyl-4-((9-phenyl-9H-carbazol-3-yl)methyl)-3,4-dihydroisoquinolin-1(2H)-one (3t)**

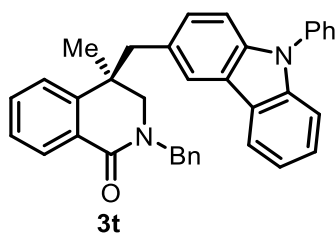

Prepared according to typical procedure from **2t** (110.8 mg, 0.3 mmol), *N*-allyl carboxamide **1a** (78.2 mg, 0.2 mmol), after a flash column chromatography (hexanes: EA = 20:1-10:1) afforded the product **3t** as a white solid (92.1 mg, 91% yield) with 91% *ee*, m.p.: 79.5-80.1 °C. <sup>1</sup>H NMR (400 MHz, CDCl<sub>3</sub>) δ 8.36-8.34 (m, 1H), 8.06-8.03 (m, 1H), 7.66-7.55 (m, 5H), 7.52-7.24 (m, 12H), 6.95 (dd, *J* = 7.6, 1.3 Hz, 1H), 6.79 (dd, *J* = 8.4, 1.7 Hz, 1H), 5.13 (d, *J* = 14.4 Hz, 1H), 4.76 (d, *J* = 14.5 Hz, 1H), 3.48 (d, *J* = 12.6 Hz, 1H), 3.23 (d, *J* = 12.6 Hz, 1H), 3.12 (d, *J* = 13.5 Hz, 1H), 2.86 (d, *J* = 13.4 Hz, 1H), 1.31 (s, 3H); <sup>13</sup>C NMR (101 MHz, CDCl<sub>3</sub>) δ 164.6, 145.1, 140.9, 139.6, 137.6, 136.9, 131.5, 129.8, 128.8, 128.6, 128.6, 128.3, 128.1, 127.5 (two peaks overlap), 127.3, 126.9, 126.9, 125.9, 125.1, 123.1, 122.9, 121.9, 120.0, 119.9, 109.7, 108.9, 55.8, 51.0, 45.9, 38.3, 21.9. HRMS (EI): *m/z*: [M]<sup>+</sup> Calcd for C<sub>36</sub>H<sub>30</sub>N<sub>2</sub>O: 506.2358, found

506.2357. HPLC (OD-H, 2-propanol /n-hexane = 10/90, flow rate = 1.0 mL/min, 1 = 254 nm) tR = 19.2 min (major), 22.6 min (minor).  $[\alpha]_D^{20} = -180.6$  ( $c = 0.5$ ,  $\text{CHCl}_3$ ).

<Chromatogram>

mAU

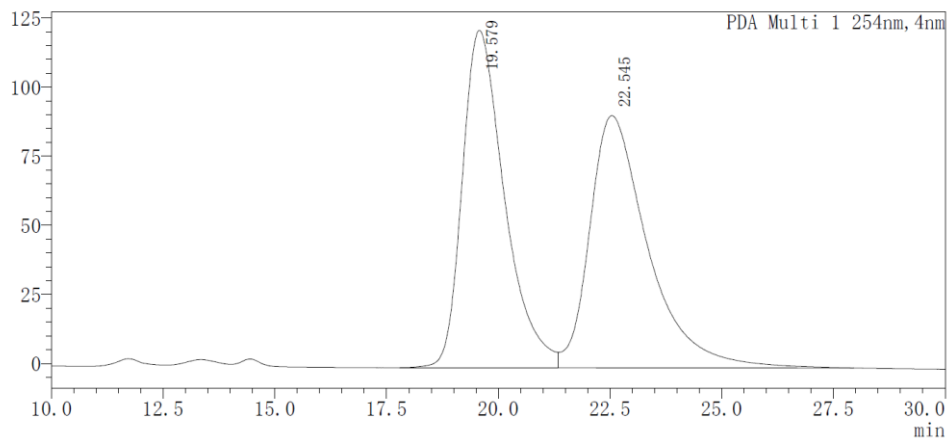

<Peak Table>

PDA Ch1 254nm

| No.   | Ret. Time (min) | Height (mAU) | Height% | Area (mAU*min) | Area%   |
|-------|-----------------|--------------|---------|----------------|---------|
| 1     | 19.579          | 122008       | 57.218  | 8028087        | 49.201  |
| 2     | 22.545          | 91227        | 42.782  | 8288863        | 50.799  |
| Total |                 | 213235       | 100.000 | 16316950       | 100.000 |

<Chromatogram>

mAU

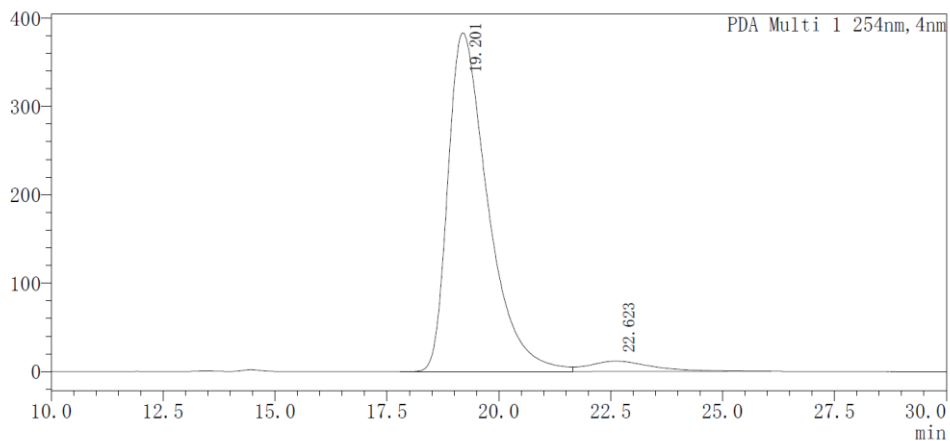

<Peak Table>

PDA Ch1 254nm

| No.   | Ret. Time (min) | Height (mAU) | Height% | Area (mAU*min) | Area%   |
|-------|-----------------|--------------|---------|----------------|---------|
| 1     | 19.201          | 383575       | 97.038  | 23818711       | 95.408  |
| 2     | 22.623          | 11707        | 2.962   | 1146392        | 4.592   |
| Total |                 | 395282       | 100.000 | 24965103       | 100.000 |

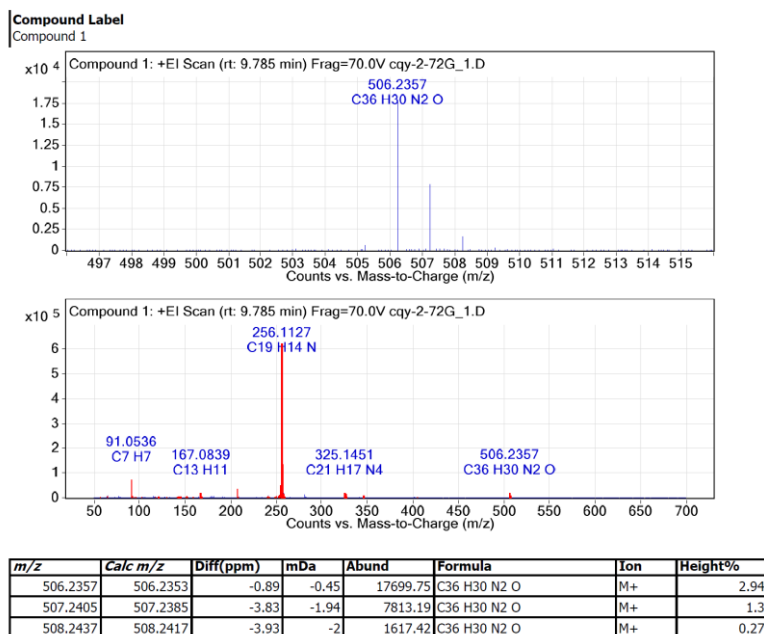

**(*R*)-2-benzyl-4-methyl-4-(quinolin-4-ylmethyl)-3,4-dihydroisoquinolin-1(2H)-one (3u)**

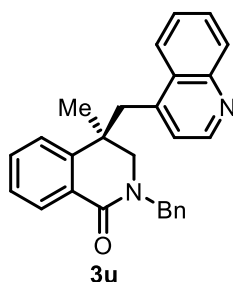

Prepared according to typical procedure from **2u** (76.6 mg, 0.3 mmol), *N*-allyl carboxamide **1a** (78.2 mg, 0.2 mmol), after a flash column chromatography (hexanes: EA = 20:1-10:1) afforded the product **3u** as a yellow oil (72.3 mg, 92% yield) with 85% *ee*. **<sup>1</sup>H NMR** (400 MHz, CDCl<sub>3</sub>) δ 8.66 (d, *J* = 4.5 Hz, 1H), 8.28 (dd, *J* = 7.8, 1.5 Hz, 1H), 8.06 (dd, *J* = 8.5, 1.3 Hz, 1H), 7.64-7.60 (m, 1H), 7.54-7.52 (m, 1H), 7.42-7.28 (m, 7H), 7.19-7.14 (m, 1H), 6.62-6.59 (m, 2H), 4.83 (s, 2H), 3.56 (d, *J* = 12.7 Hz, 1H), 3.48 (d, *J* = 13.4 Hz, 1H), 3.27 (d, *J* = 12.7 Hz, 1H), 2.95 (d, *J* = 13.4 Hz, 1H), 1.26 (s, 3H); **<sup>13</sup>C NMR** (101 MHz, CDCl<sub>3</sub>) δ 164.3, 149.1, 148.2, 143.5, 143.2, 136.7, 131.6, 129.9, 129.0, 128.8, 128.7, 128.7, 128.4, 128.2, 127.8, 127.3, 126.1, 125.0, 123.6, 123.6, 56.6, 50.7, 40.3, 38.5, 22.6. **HRMS** (EI): *m/z*: [M]<sup>+</sup> Calcd for C<sub>27</sub>H<sub>24</sub>N<sub>2</sub>O: 392.1889, found 392.1888. HPLC (AD-H, 2-propanol /n-hexane = 15/85, flow rate = 1.0 mL/min, λ = 254 nm) tR = 18.7 min (major), 24.2 min (minor). [α]<sub>D</sub><sup>20</sup> = -120.2 (*c* = 0.5, CHCl<sub>3</sub>).

<Chromatogram>

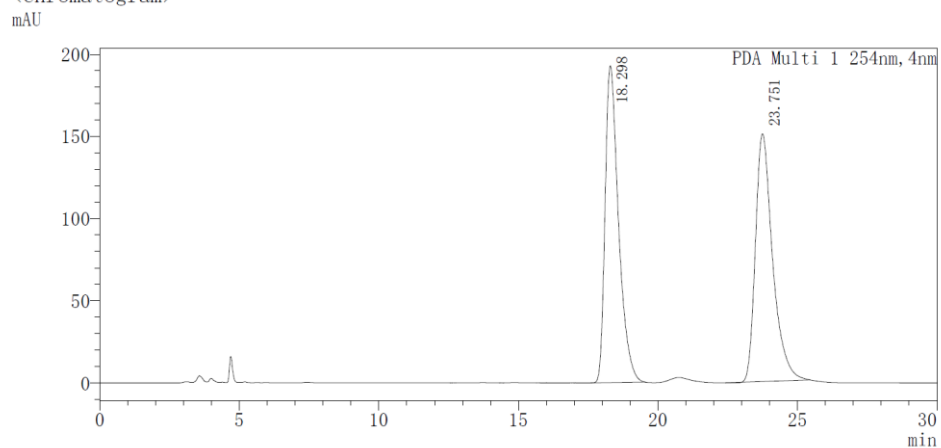

<Peak Table>

PDA Ch1 254nm

| No.   | Ret. Time (min) | Height (mAU) | Height% | Area (mAU*min) | Area%   |
|-------|-----------------|--------------|---------|----------------|---------|
| 1     | 18.298          | 192779       | 56.110  | 6446466        | 49.986  |
| 2     | 23.751          | 150796       | 43.890  | 6450056        | 50.014  |
| Total |                 | 343575       | 100.000 | 12896522       | 100.000 |

<Chromatogram>

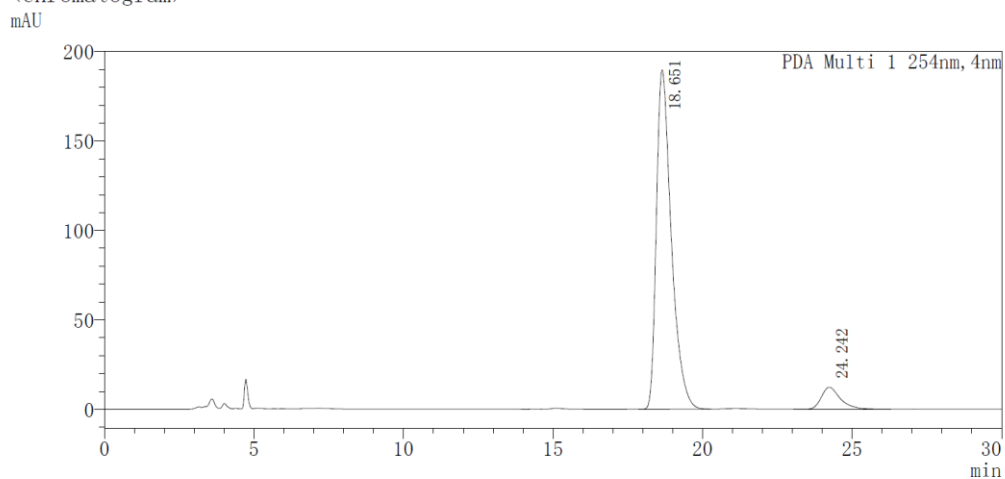

<Peak Table>

PDA Ch1 254nm

| No.   | Ret. Time (min) | Height (mAU) | Height% | Area (mAU*min) | Area%   |
|-------|-----------------|--------------|---------|----------------|---------|
| 1     | 18.651          | 189683       | 93.916  | 6582606        | 92.406  |
| 2     | 24.242          | 12289        | 6.084   | 540986         | 7.594   |
| Total |                 | 201972       | 100.000 | 7123592        | 100.000 |

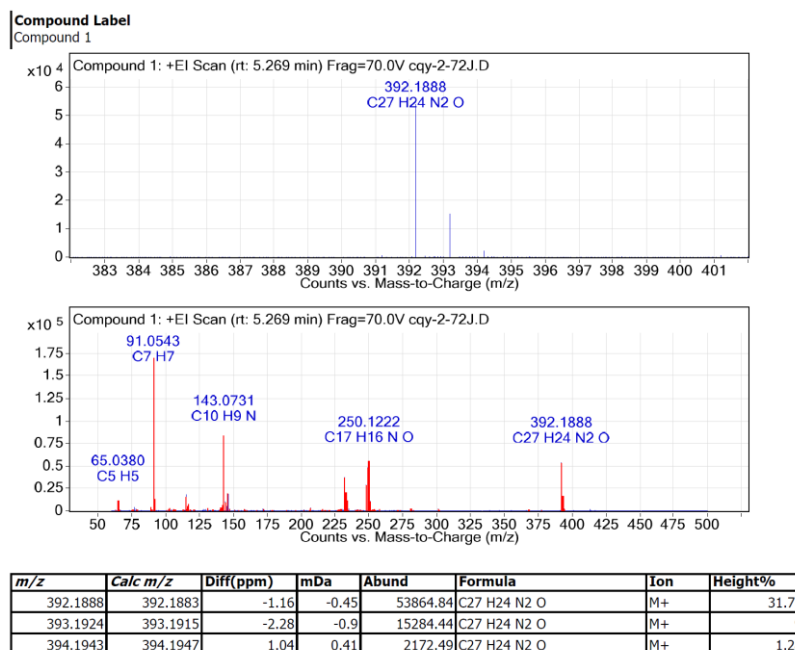

**(R)-4-allyl-2-benzyl-4-methyl-3,4-dihydroisoquinolin-1(2H)-one (3v)**

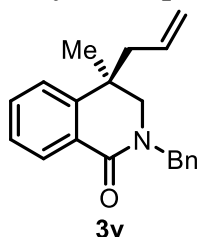

Prepared according to typical procedure from **2v** (46.2 mg, 0.3 mmol), *N*-allyl carboxamide **1a** (78.2 mg, 0.2 mmol), after a flash column chromatography (hexanes: EA = 20:1-10:1) afforded the product **3v** as a yellow oil (62.9 mg, 99% yield) with 81% *ee*. **<sup>1</sup>H NMR** (400 MHz, CDCl<sub>3</sub>) δ 8.22 (dd, *J* = 7.8, 1.5 Hz, 1H), 7.51-7.47 (m, 1H), 7.40-7.30 (m, 6H), 7.25 (dd, *J* = 7.7, 1.2 Hz, 1H), 5.54-5.43 (m, 1H), 5.03-4.99 (m, 1H), 4.92-4.84 (m, 2H), 4.69 (d, *J* = 14.4 Hz, 1H), 3.32 (d, *J* = 12.6 Hz, 1H), 3.21 (d, *J* = 12.6 Hz, 1H), 2.28-2.25 (m, 2H), 1.24 (s, 3H); **<sup>13</sup>C NMR** (101 MHz, CDCl<sub>3</sub>) δ 164.2, 145.3, 136.9, 133.2 (two peaks overlap), 131.8, 128.7, 128.5, 128.1, 127.5, 126.8, 124.1, 118.6, 54.9, 50.6, 43.7, 36.8, 22.8. **HRMS** (EI): *m/z*: [M]<sup>+</sup> Calcd for C<sub>20</sub>H<sub>21</sub>NO: 291.1623, found 291.1622. HPLC (AD-H, 2-propanol /n-hexane = 10/90, flow rate = 1.0 mL/min, λ = 254 nm) tR = 9.8 min (major), 14.7 min (minor). [α]<sub>D</sub><sup>20</sup> = -80.7 (*c* = 0.5, CHCl<sub>3</sub>).

<Chromatogram>

mAU

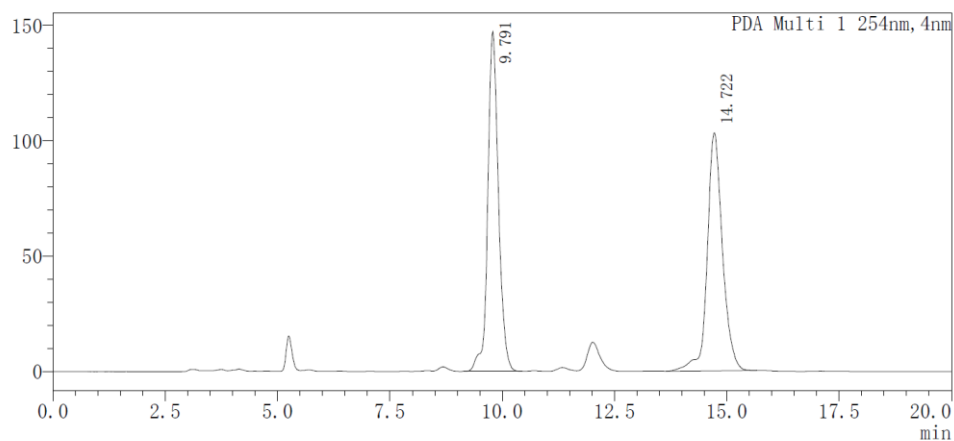

<Peak Table>

PDA Ch1 254nm

| No.   | Ret. Time (min) | Height (mAU) | Height% | Area (mAU*min) | Area%   |
|-------|-----------------|--------------|---------|----------------|---------|
| 1     | 9.791           | 147126       | 58.781  | 2436885        | 50.014  |
| 2     | 14.722          | 103170       | 41.219  | 2435507        | 49.986  |
| Total |                 | 250296       | 100.000 | 4872392        | 100.000 |

<Chromatogram>

mAU

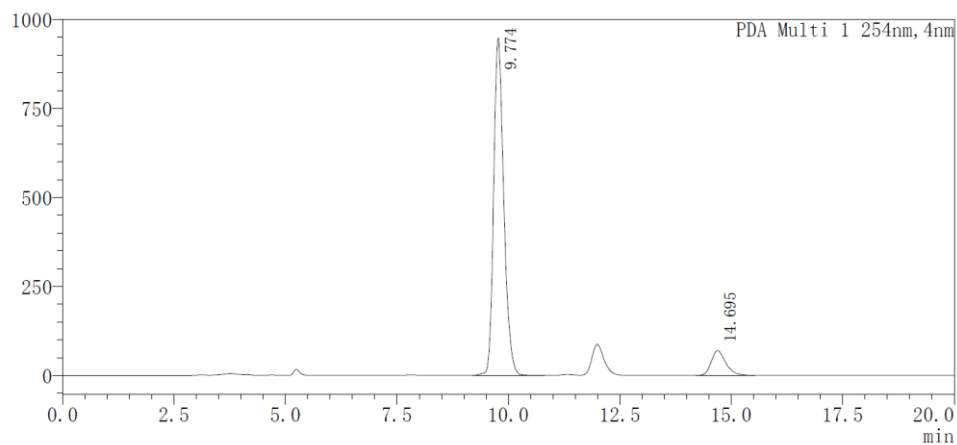

<Peak Table>

PDA Ch1 254nm

| No.   | Ret. Time (min) | Height (mAU) | Height% | Area (mAU*min) | Area%   |
|-------|-----------------|--------------|---------|----------------|---------|
| 1     | 9.774           | 947252       | 93.192  | 14987954       | 90.593  |
| 2     | 14.695          | 69205        | 6.808   | 1556323        | 9.407   |
| Total |                 | 1016457      | 100.000 | 16544276       | 100.000 |

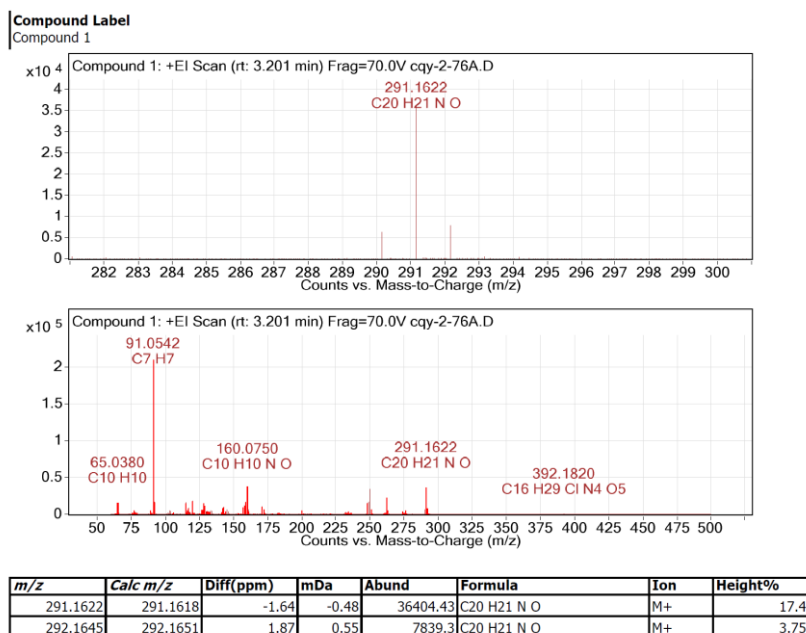

**(*R*)-2-benzyl-4-methyl-4-(2-methylallyl)-3,4-dihydroisoquinolin-1(2H)-one (3w)**

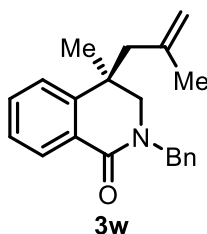

Prepared according to typical procedure from **2w** (100.8 mg, 0.6 mmol), *N*-allyl carboxamide **1a** (78.2 mg, 0.2 mmol), after a flash column chromatography (hexanes: EA = 20:1-10:1) afforded the product **3w** as a yellow oil (31.5 mg, 52% yield) with 96% *ee*. **<sup>1</sup>H NMR** (400 MHz, CDCl<sub>3</sub>) δ 8.21 (dd, *J* = 7.7, 1.5 Hz, 1H), 7.49-7.45 (m, 1H), 7.40-7.24 (m, 7H), 5.07 (d, *J* = 14.5 Hz, 1H), 4.87-4.85 (m, 1H), 4.56 (d, *J* = 14.5 Hz, 1H), 4.49-4.48 (m, 1H), 3.38 (d, *J* = 12.6 Hz, 1H), 3.20 (d, *J* = 12.6 Hz, 1H), 2.31 (d, *J* = 13.2 Hz, 1H), 2.20 (d, *J* = 13.3 Hz, 1H), 1.40 (s, 3H), 1.30 (s, 3H); **<sup>13</sup>C NMR** (101 MHz, CDCl<sub>3</sub>) δ 164.3, 145.3, 141.7, 136.9, 131.8, 128.7 (two peaks overlap), 128.6, 128.5, 127.5, 126.9, 124.6, 115.6, 56.0, 50.9, 47.0, 37.3, 24.7, 23.3. **HRMS** (EI): *m/z*: [M]<sup>+</sup> Calcd for C<sub>21</sub>H<sub>23</sub>NO: 305.1780, found 305.1774. HPLC (IC, 2-propanol /n-hexane = 5/95, flow rate = 0.8 mL/min, λ = 254 nm) t<sub>R</sub> = 46.1 min (major), 50.6 min (minor). [α]<sub>D</sub><sup>20</sup> = -53.8 (*c* = 0.5, CHCl<sub>3</sub>).



<Chromatogram>

mAU

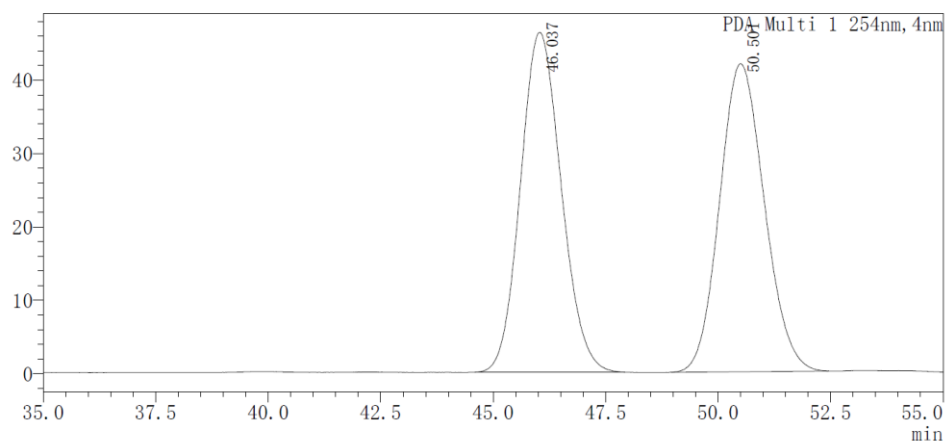

<Peak Table>

PDA Ch1 254nm

| No.   | Ret. Time (min) | Height (mAU) | Height% | Area (mAU*min) | Area%   |
|-------|-----------------|--------------|---------|----------------|---------|
| 1     | 46.037          | 46313        | 52.463  | 2921061        | 50.142  |
| 2     | 50.501          | 41964        | 47.537  | 2904510        | 49.858  |
| Total |                 | 88277        | 100.000 | 5825571        | 100.000 |

<Chromatogram>

mAU

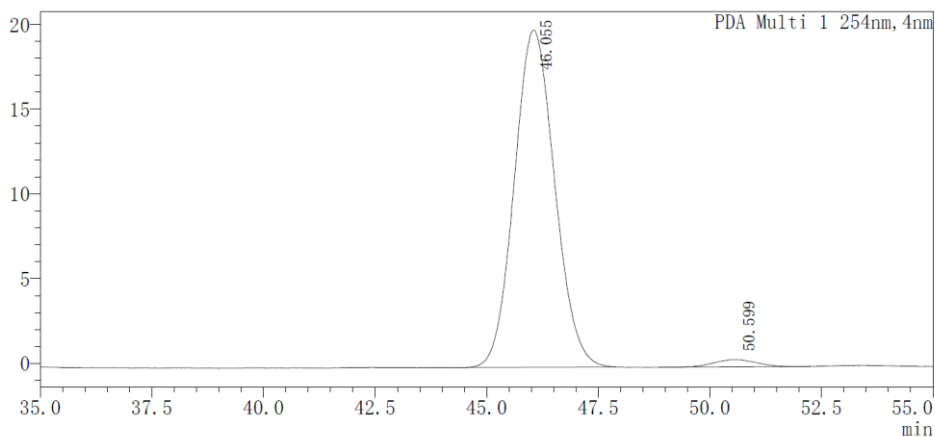

<Peak Table>

PDA Ch1 254nm

| No.   | Ret. Time (min) | Height (mAU) | Height% | Area (mAU*min) | Area%   |
|-------|-----------------|--------------|---------|----------------|---------|
| 1     | 46.055          | 19886        | 97.885  | 1254182        | 97.778  |
| 2     | 50.599          | 430          | 2.115   | 28501          | 2.222   |
| Total |                 | 20315        | 100.000 | 1282683        | 100.000 |

**Ethyl (*R,E*)-4-(2-benzyl-4-methyl-1-oxo-1,2,3,4-tetrahydroisoquinolin-4-yl)but-2-enoate (**3x**)**

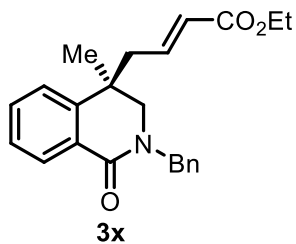

Prepared according to typical procedure from **2x** (67.8 mg, 0.3 mmol), *N*-allyl carboxamide **1a** (78.2 mg, 0.2 mmol), after a flash column chromatography (hexanes: EA = 20:1-10:1) afforded the product **3x** as a yellow oil (59.6 mg, 82% yield) with 81% *ee*. **<sup>1</sup>H NMR** (400 MHz, CDCl<sub>3</sub>) δ 8.21 (dd, *J* = 7.8, 1.5 Hz, 1H), 7.51-7.47 (m, 1H), 7.42-7.26 (m, 6H), 7.24-7.21 (m, 1H), 6.62-6.54 (m, 1H), 5.61-5.56 (m, 1H), 4.83 (d, *J* = 14.4 Hz, 1H), 4.71 (d, *J* = 14.4 Hz, 1H), 4.19-4.13 (m, 2H), 3.35 (d, *J* = 12.8 Hz, 1H), 3.18 (d, *J* = 12.7 Hz, 1H), 2.37-2.33 (m, 2H), 1.29 (t, *J* = 7.1 Hz, 3H), 1.26 (s, 3H); **<sup>13</sup>C NMR** (101 MHz, CDCl<sub>3</sub>) δ 165.8, 164.0, 144.4, 143.2, 136.7, 132.1, 128.9, 128.6, 128.5, 128.0, 127.6, 127.1, 124.7, 123.9, 60.2, 54.9, 50.5, 41.7, 37.1, 22.7, 14.1. **HRMS** (EI): *m/z*: [M]<sup>+</sup> Calcd for C<sub>23</sub>H<sub>25</sub>NO<sub>3</sub>: 363.1834, found 363.1827. HPLC (OJ-H, 2-propanol /n-hexane = 10/90, flow rate = 1.0 mL/min, λ = 254 nm) t<sub>R</sub> = 15.9 min (major), 23.7 min (minor). [α]<sub>D</sub><sup>20</sup> = -112.5 (*c* = 0.5, CHCl<sub>3</sub>).

<Chromatogram>  
mAU

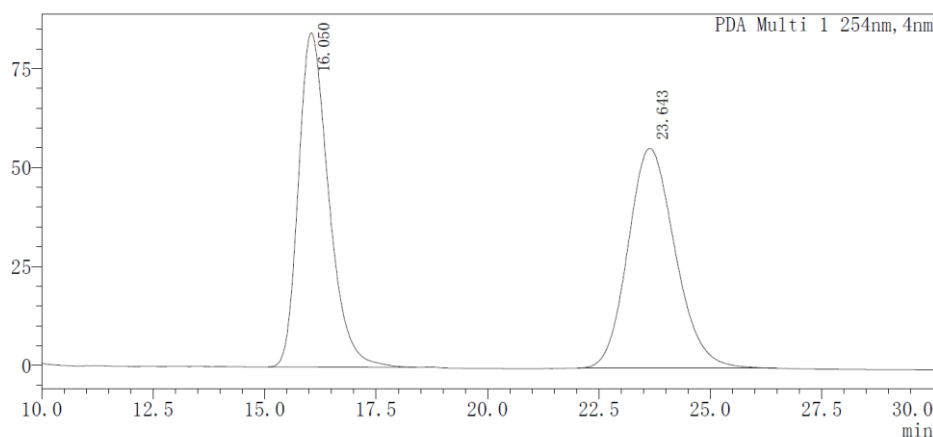

<Peak Table>

PDA Ch1 254nm

| No.   | Ret. Time (min) | Height (mAU) | Height% | Area (mAU*min) | Area%   |
|-------|-----------------|--------------|---------|----------------|---------|
| 1     | 16.050          | 84482        | 60.320  | 3991339        | 49.359  |
| 2     | 23.643          | 55575        | 39.680  | 4095085        | 50.641  |
| Total |                 | 140057       | 100.000 | 8086424        | 100.000 |

<Chromatogram>

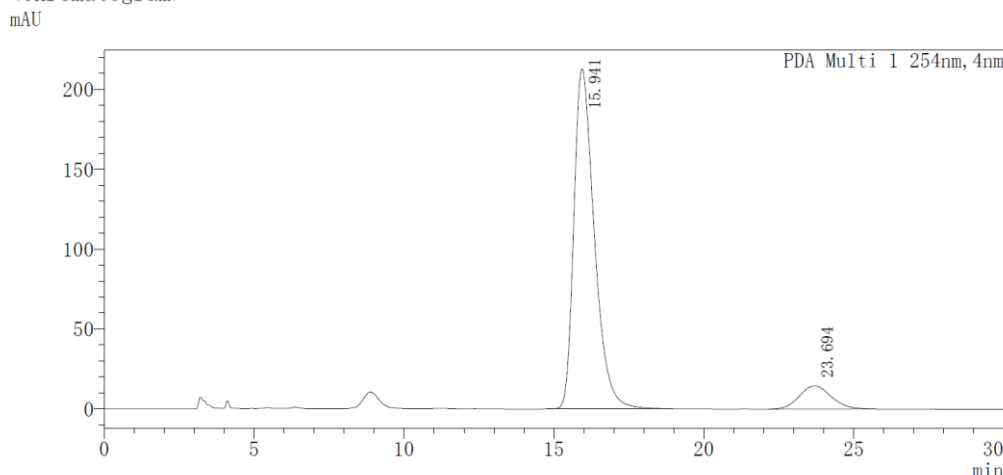

<Peak Table>

PDA Ch1 254nm

| No.   | Ret. Time (min) | Height (mAU) | Height% | Area (mAU*min) | Area%   |
|-------|-----------------|--------------|---------|----------------|---------|
| 1     | 15.941          | 213009       | 93.622  | 10109515       | 90.466  |
| 2     | 23.694          | 14512        | 6.378   | 1065378        | 9.534   |
| Total |                 | 227521       | 100.000 | 11174893       | 100.000 |

**(R)-2-benzyl-4-cinnamyl-4-methyl-3,4-dihydroisoquinolin-1(2H)-one (3y)**

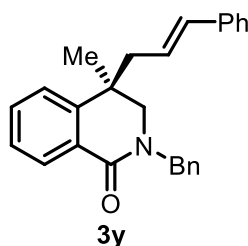

Prepared according to typical procedure from **2y** (69.0 mg, 0.3 mmol), *N*-allyl carboxamide **1a** (78.2 mg, 0.2 mmol), after a flash column chromatography (hexanes: EA = 20:1-10:1) afforded the product **3y** as a yellow oil (69.0 mg, 96% yield) with 84% *ee*. **<sup>1</sup>H NMR** (400 MHz, CDCl<sub>3</sub>) δ 8.28 (dd, *J* = 7.7, 1.5 Hz, 1H), 7.55-7.51 (m, 1H), 7.44-7.30 (m, 9H), 7.27-7.22 (m, 3H), 6.22 (d, *J* = 15.7 Hz, 1H), 5.84-5.77 (m, 1H), 4.89 (d, *J* = 14.4 Hz, 1H), 4.77 (d, *J* = 14.4 Hz, 1H), 3.39 (d, *J* = 12.6 Hz, 1H), 3.27 (d, *J* = 12.6 Hz, 1H), 2.43-2.37 (m, 2H), 1.31 (s, 3H); **<sup>13</sup>C NMR** (101 MHz, CDCl<sub>3</sub>) δ 164.2, 145.3, 137.0, 133.5, 131.9, 128.8, 128.6, 128.6, 128.4 (two peaks overlap), 128.1, 127.6, 127.2, 126.9, 126.0, 124.8, 124.1, 54.8, 50.5, 42.9, 37.4, 22.6. **HRMS** (EI): *m/z*: [M]<sup>+</sup> Calcd for C<sub>26</sub>H<sub>25</sub>NO: 367.1936, found 367.1934. HPLC (AD-H, 2-propanol /n-hexane = 10/90, flow rate = 1.0 mL/min, λ = 254 nm) t<sub>R</sub> = 15.7 min (major), 18.3 min (minor). [α]<sub>D</sub><sup>20</sup> = -115.8 (*c* = 0.5, CHCl<sub>3</sub>).

<Chromatogram>

mAU

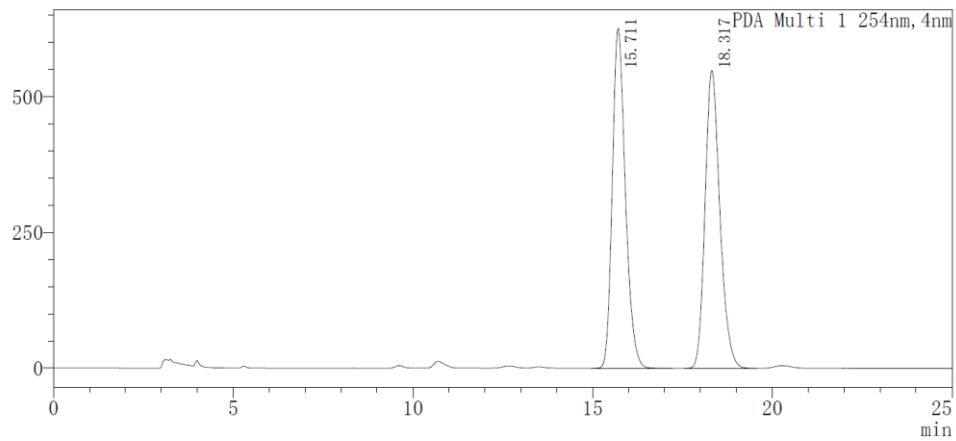

<Peak Table>

PDA Ch1 254nm

| No.   | Ret. Time (min) | Height (mAU) | Height% | Area (mAU*min) | Area%   |
|-------|-----------------|--------------|---------|----------------|---------|
| 1     | 15.711          | 626187       | 53.283  | 15817989       | 50.045  |
| 2     | 18.317          | 549019       | 46.717  | 15789445       | 49.955  |
| Total |                 | 1175205      | 100.000 | 31607434       | 100.000 |

<Chromatogram>

mAU

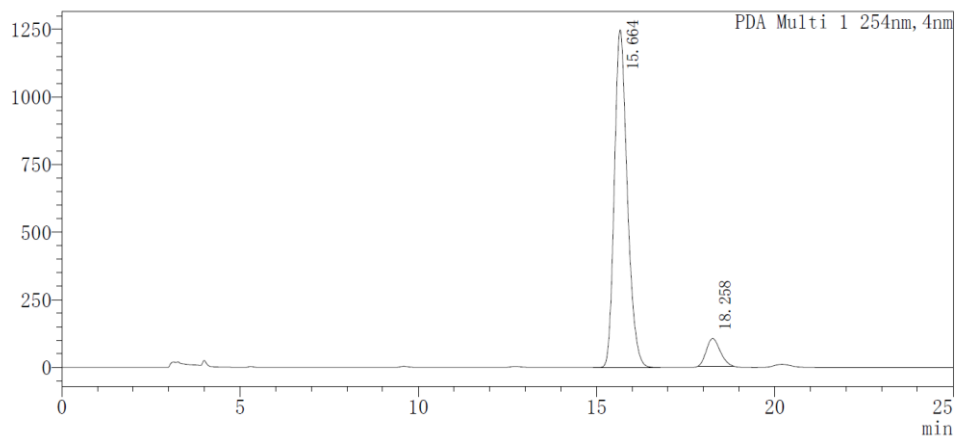

<Peak Table>

PDA Ch1 254nm

| No.   | Ret. Time (min) | Height (mAU) | Height% | Area (mAU*min) | Area%   |
|-------|-----------------|--------------|---------|----------------|---------|
| 1     | 15.664          | 1247520      | 92.408  | 31521365       | 91.989  |
| 2     | 18.258          | 102488       | 7.592   | 2745036        | 8.011   |
| Total |                 | 1350008      | 100.000 | 34266401       | 100.000 |

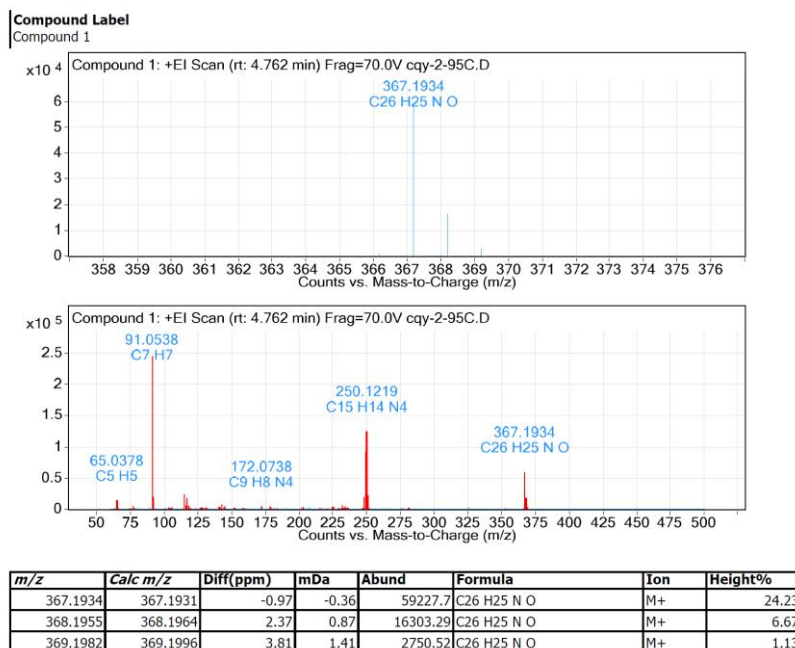

**(*R*)-2-benzyl-4-(cyclopent-1-en-1-ylmethyl)-4-methyl-3,4-dihydroisoquinolin-1(2H)-one (3z)**

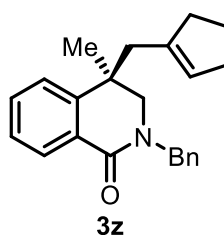

Prepared according to typical procedure from **2z** (116.4 mg, 0.6 mmol), *N*-allyl carboxamide **1a** (78.2 mg, 0.2 mmol), after a flash column chromatography (hexanes: EA = 20:1-10:1) afforded the product **3z** as a yellow oil (45.7 mg, 69% yield) with 90% *ee*. **<sup>1</sup>H NMR** (400 MHz, CDCl<sub>3</sub>) δ 8.21 (dd, *J* = 7.7, 1.6 Hz, 1H), 7.48-7.44 (m, 1H), 7.39-7.33 (m, 5H), 7.31-7.27 (m, 1H), 7.25-7.23 (m, 1H), 5.17 (t, *J* = 2.1 Hz, 1H), 5.04 (d, *J* = 14.5 Hz, 1H), 4.57 (d, *J* = 14.5 Hz, 1H), 3.33 (d, *J* = 12.6 Hz, 1H), 3.23 (d, *J* = 12.6 Hz, 1H), 2.34 (s, 2H), 2.26-2.21 (m, 2H), 2.02-1.92 (m, 1H), 1.81-1.66 (m, 3H), 1.26 (s, 3H); **<sup>13</sup>C NMR** (101 MHz, CDCl<sub>3</sub>) δ 164.4, 145.7, 140.2, 137.0, 131.7, 129.4, 128.7 (two peaks overlap), 128.6, 128.1, 127.5, 126.8, 124.4, 55.7, 50.9, 40.6, 37.3, 37.1, 32.5, 24.0, 23.8. **HRMS** (EI): *m/z*: [M]<sup>+</sup> Calcd for C<sub>23</sub>H<sub>25</sub>NO: 331.1936, found 331.1933. HPLC (AD-H, 2-propanol /n-hexane = 10/90, flow rate = 1.0 mL/min, λ = 254 nm) t<sub>R</sub> = 11.8 min (major), 19.1 min (minor). [α]<sub>D</sub><sup>20</sup> = -107.3 (*c* = 0.5, CHCl<sub>3</sub>).

<Chromatogram>

mAU

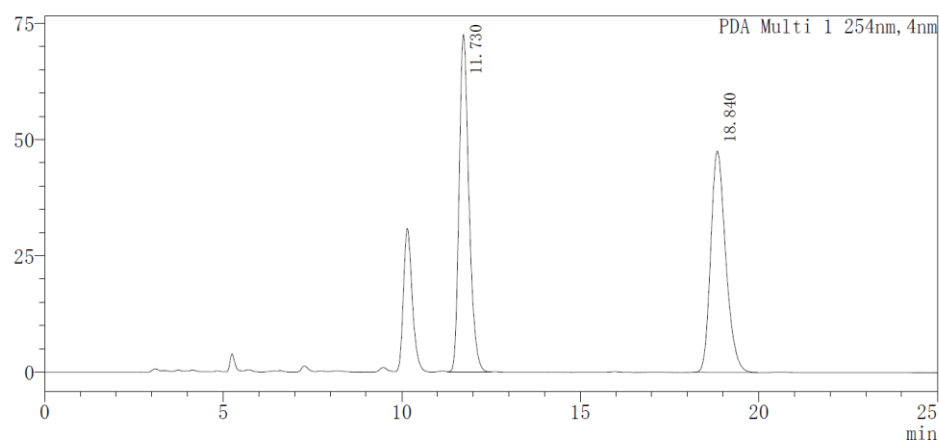

<Peak Table>

PDA Ch1 254nm

| No.   | Ret. Time (min) | Height (mAU) | Height% | Area (mAU*min) | Area%   |
|-------|-----------------|--------------|---------|----------------|---------|
| 1     | 11.730          | 72563        | 60.387  | 1389233        | 49.927  |
| 2     | 18.840          | 47601        | 39.613  | 1393272        | 50.073  |
| Total |                 | 120164       | 100.000 | 2782505        | 100.000 |

<Chromatogram>

mAU

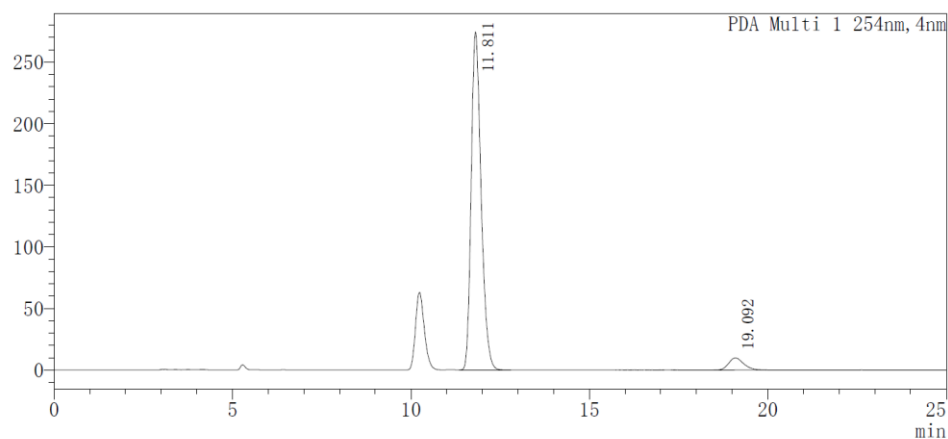

<Peak Table>

PDA Ch1 254nm

| No.   | Ret. Time (min) | Height (mAU) | Height% | Area (mAU*min) | Area%   |
|-------|-----------------|--------------|---------|----------------|---------|
| 1     | 11.811          | 274204       | 96.519  | 5306246        | 94.819  |
| 2     | 19.092          | 9889         | 3.481   | 289930         | 5.181   |
| Total |                 | 284094       | 100.000 | 5596176        | 100.000 |

**(R)-2-benzyl-4-methyl-4-(3-methylbut-2-en-1-yl)-3,4-dihydroisoquinolin-1(2H)-one (3aa)**

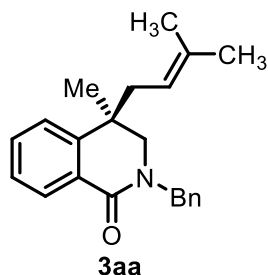

Prepared according to typical procedure from **2aa** (109.2 mg, 0.6 mmol), *N*-allyl carboxamide **1a** (78.2 mg, 0.2 mmol), after a flash column chromatography (hexanes: EA = 20:1-10:1) afforded the product **3aa** as a yellow oil (51.0 mg, 80% yield) with 87% *ee*. **<sup>1</sup>H NMR** (400 MHz, CDCl<sub>3</sub>) δ 8.20 (dd, *J* = 7.7, 1.5 Hz, 1H), 7.50-7.46 (m, 1H), 7.39-7.28 (m, 6H), 7.24-7.22 (m, 1H), 4.89 (d, *J* = 14.5 Hz, 1H), 4.86-4.82 (m, 1H), 4.70 (d, *J* = 14.4 Hz, 1H), 3.32-3.21 (m, 2H), 2.26-2.13 (m, 2H), 1.64 (d, *J* = 1.4 Hz, 3H), 1.42 (d, *J* = 1.4 Hz, 3H), 1.21 (s, 3H); **<sup>13</sup>C NMR** (101 MHz, CDCl<sub>3</sub>) δ 164.3, 145.7, 137.0, 135.0, 131.7, 128.7, 128.6, 128.6, 128.2, 127.5, 126.6, 124.2, 118.9, 55.2, 50.7, 37.6, 25.9, 22.9, 17.67. **HRMS** (EI): *m/z*: [M]<sup>+</sup> Calcd for C<sub>22</sub>H<sub>25</sub>NO: 319.1936, found 319.1934. HPLC (AD-H, 2-propanol /n-hexane = 10/90, flow rate = 1.0 mL/min, λ = 254 nm) tR = 9.5 min (major), 15.3 min (minor). [α]<sub>D</sub><sup>20</sup> = -116.6 (*c* = 0.5, CHCl<sub>3</sub>).

<Chromatogram>  
mAU

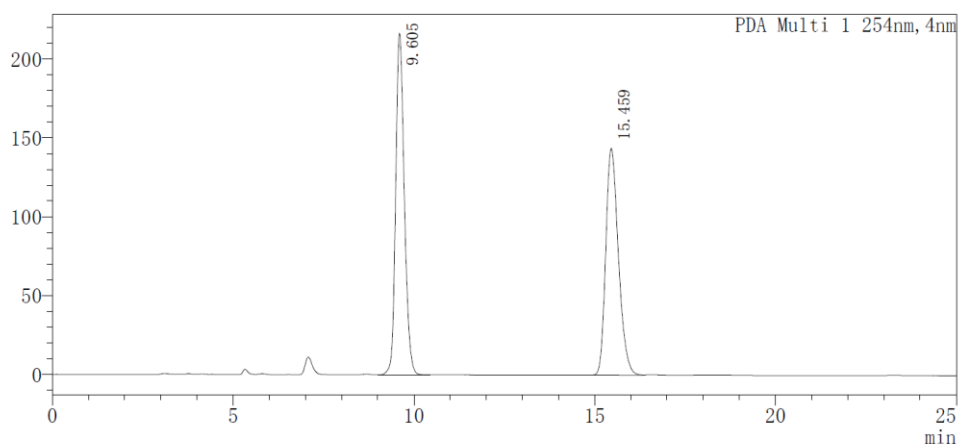

<Peak Table>

PDA Ch1 254nm

| No.   | Ret. Time (min) | Height (mAU) | Height% | Area (mAU*min) | Area%   |
|-------|-----------------|--------------|---------|----------------|---------|
| 1     | 9.605           | 216632       | 60.097  | 3604236        | 50.773  |
| 2     | 15.459          | 143840       | 39.903  | 3494518        | 49.227  |
| Total |                 | 360473       | 100.000 | 7098755        | 100.000 |

<Chromatogram>

mAU

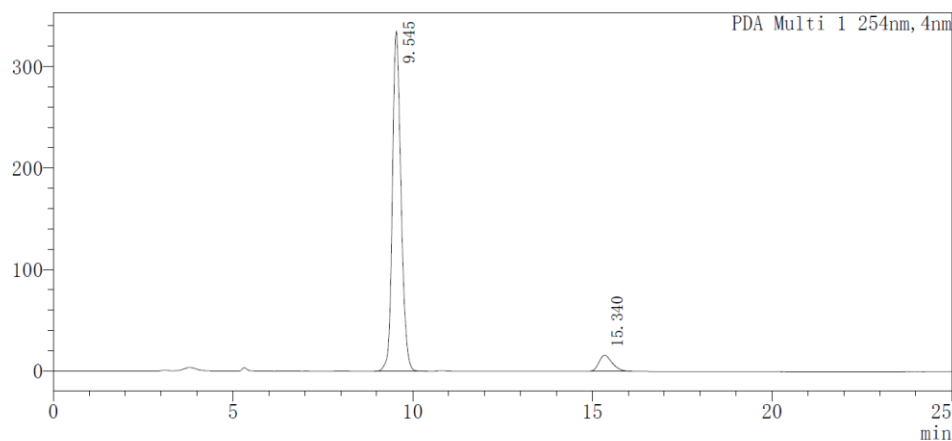

<Peak Table>

PDA Ch1 254nm

| No.   | Ret. Time (min) | Height (mAU) | Height% | Area (mAU*min) | Area%   |
|-------|-----------------|--------------|---------|----------------|---------|
| 1     | 9.545           | 334763       | 95.484  | 5598699        | 93.259  |
| 2     | 15.340          | 15832        | 4.516   | 404690         | 6.741   |
| Total |                 | 350595       | 100.000 | 6003389        | 100.000 |

Compound Label

Compound 1

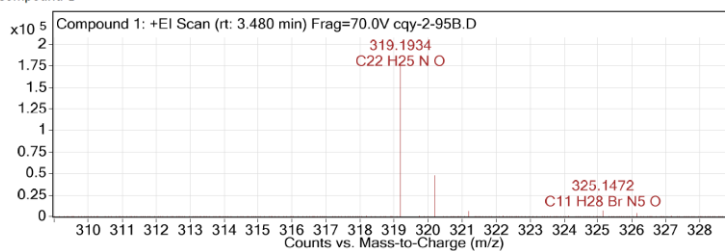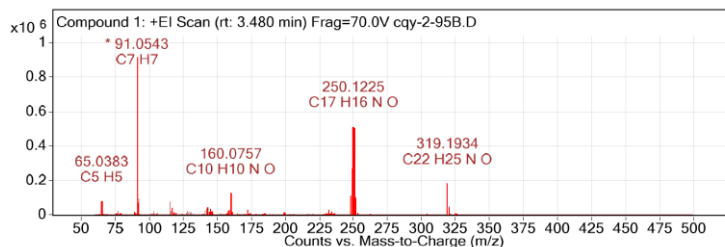

| m/z      | Calc m/z | Diff(ppm) | mDa   | Abund     | Formula     | Ion | Height% |
|----------|----------|-----------|-------|-----------|-------------|-----|---------|
| 319.1934 | 319.1931 | -1.17     | -0.37 | 178778.89 | C22 H25 N O | M+  | 20.04   |
| 320.1957 | 320.1964 | 2.09      | 0.67  | 47703     | C22 H25 N O | M+  | 5.35    |
| 321.2014 | 321.1995 | -5.85     | -1.88 | 5875.04   | C22 H25 N O | M+  | 0.66    |

**(R)-4-benzyl-2-(4-methoxybenzyl)-4-methyl-3,4-dihydroisoquinolin-1(2H)-one(5a)**

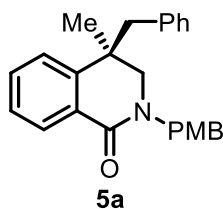

Prepared according to typical procedure from **2a** (61.2 mg, 0.3 mmol), *N*-allyl carboxamide **4a** (84.3 mg, 0.2 mmol), after a flash column chromatography (hexanes:



EA = 20:1-10:1) afforded the product **5a** as a yellow oil (49.9 mg, 67% yield) with 93% *ee*. **<sup>1</sup>H NMR** (400 MHz, CDCl<sub>3</sub>) δ 8.29-8.24 (m, 1H), 7.42-7.38 (m, 2H), 7.37-7.32 (m, 2H), 7.23-7.15 (m, 3H), 6.96-6.86 (m, 3H), 6.76-6.71 (m, 2H), 4.86 (d, *J* = 14.3 Hz, 1H), 4.72 (d, *J* = 14.3 Hz, 1H), 3.81 (s, 3H), 3.37 (d, *J* = 12.6 Hz, 1H), 3.14 (d, *J* = 12.7 Hz, 1H), 2.86 (d, *J* = 13.3 Hz, 1H), 2.63 (d, *J* = 13.2 Hz, 1H), 1.23 (s, 3H); **<sup>13</sup>C NMR** (101 MHz, CDCl<sub>3</sub>) δ 164.3, 159.0, 144.8, 136.8, 131.5, 130.5, 130.0, 129.0, 128.7, 128.1, 127.7, 126.9, 126.4, 124.8, 113.9, 55.3, 55.2, 50.1, 45.8, 37.9, 22.0. **HRMS** (EI): *m/z*: [M]<sup>+</sup> Calcd for C<sub>25</sub>H<sub>25</sub>NO<sub>2</sub>: 371.1885, found 371.1884. HPLC (AD-H, 2-propanol /n-hexane = 10/90, flow rate = 1.0 mL/min, λ = 254 nm) tR = 19.2 min (major), 34.2 min (minor). [α]<sub>D</sub><sup>20</sup> = -167.1 (*c* = 0.5, CHCl<sub>3</sub>).

<Chromatogram>

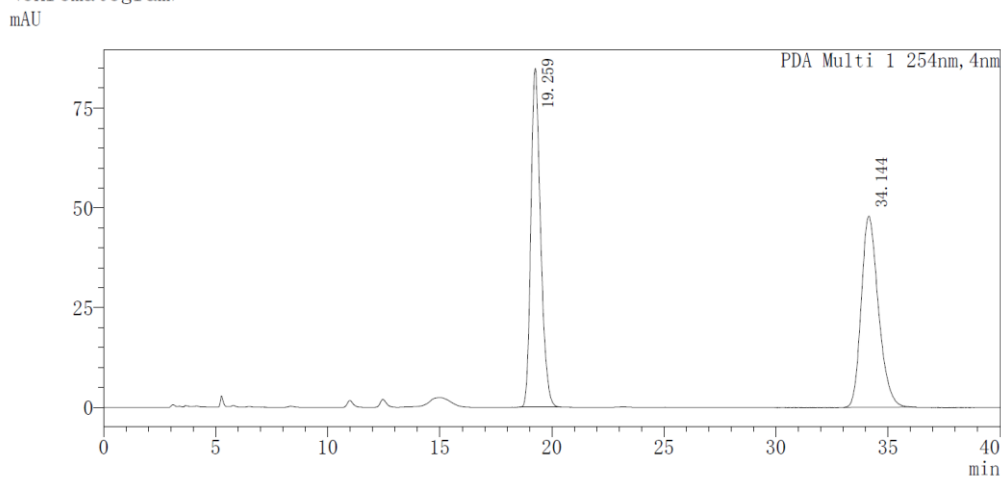

<Peak Table>

PDA Ch1 254nm

| No.   | Ret. Time (min) | Height (mAU) | Height% | Area (mAU*min) | Area%   |
|-------|-----------------|--------------|---------|----------------|---------|
| 1     | 19.259          | 84891        | 63.915  | 2557354        | 50.003  |
| 2     | 34.144          | 47928        | 36.085  | 2557050        | 49.997  |
| Total |                 | 132819       | 100.000 | 5114404        | 100.000 |

<Chromatogram>

mAU

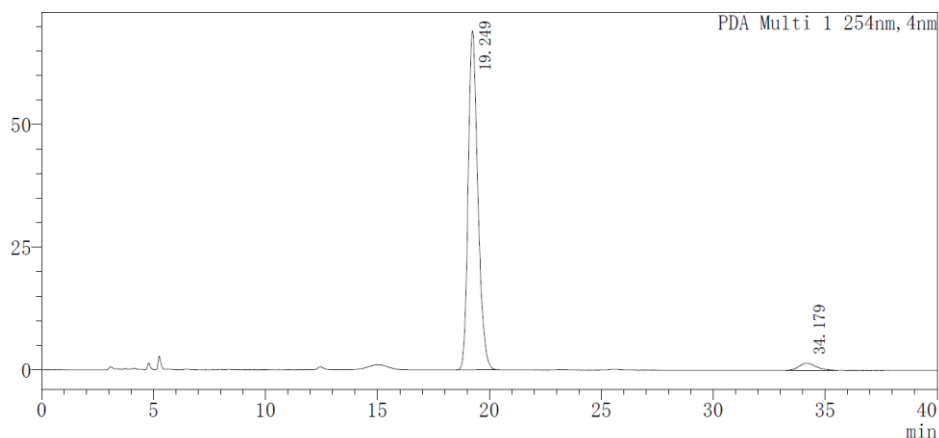

<Peak Table>

PDA Ch1 254nm

| No.   | Ret. Time (min) | Height (mAU) | Height% | Area (mAU*min) | Area%   |
|-------|-----------------|--------------|---------|----------------|---------|
| 1     | 19.249          | 69036        | 97.963  | 2075373        | 96.509  |
| 2     | 34.179          | 1435         | 2.037   | 75079          | 3.491   |
| Total |                 | 70472        | 100.000 | 2150452        | 100.000 |

Compound Label

Compound 1

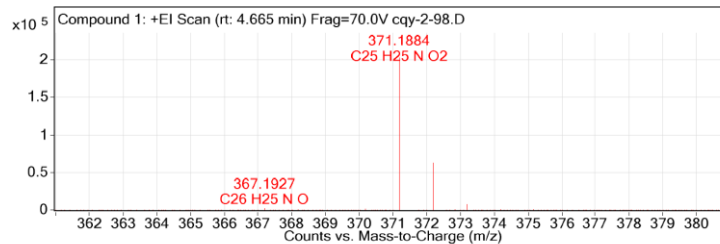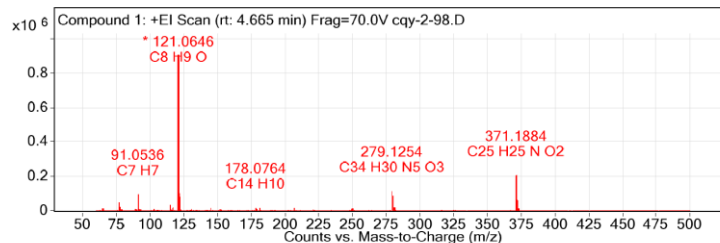

| m/z      | Calc m/z | Diff(ppm) | mDa   | Abund    | Formula      | Ion | Height% |
|----------|----------|-----------|-------|----------|--------------|-----|---------|
| 371.1884 | 371.188  | -1.17     | -0.43 | 202739.8 | C25 H25 N O2 | M+  | 22.91   |
| 372.1917 | 372.1913 | -1.08     | -0.4  | 62340.32 | C25 H25 N O2 | M+  | 7.04    |
| 373.1939 | 373.1944 | 1.2       | 0.45  | 7702.74  | C25 H25 N O2 | M+  | 0.87    |

**(R)-2-benzyl-4-methyl-4-(3-(trimethylsilyl)prop-2-yn-1-yl)-3,4-dihydroisoquinolin-1(2H)-one (5b)**

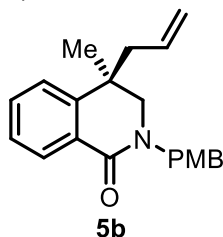

Prepared according to typical procedure from **2v** (92.4 mg, 0.6 mmol), *N*-allyl carboxamide **4a** (84.3 mg, 0.2 mmol), after a flash column chromatography (hexanes:

EA = 20:1-10:1) afforded the product **5b** as a yellow oil (56.0 mg, 87% yield) with 85% *ee*. **<sup>1</sup>H NMR** (400 MHz, CDCl<sub>3</sub>) δ 8.20 (dd, *J* = 7.7, 1.5 Hz, 1H), 7.50-7.45 (m, 1H), 7.38-7.34 (m, 1H), 7.32-7.28 (m, 2H), 7.26-7.22 (m, 1H), 6.90-6.84 (m, 2H), 5.54-5.43 (m, 1H), 5.03-4.90 (m, 2H), 4.81 (d, *J* = 14.3 Hz, 1H), 4.62 (d, *J* = 14.3 Hz, 1H), 3.80 (s, 3H), 3.28 (d, *J* = 12.6 Hz, 1H), 3.19 (d, *J* = 12.7 Hz, 1H), 2.29-2.20 (m, 2H), 1.22 (s, 3H); **<sup>13</sup>C NMR** (101 MHz, CDCl<sub>3</sub>) δ 164.1, 159.0, 145.3, 133.3, 131.8, 129.9, 129.1, 128.7, 128.2, 126.7, 124.1, 118.5, 113.9, 55.2, 54.7, 49.9, 43.7, 36.8, 22.8. **HRMS** (EI): *m/z*: [M]<sup>+</sup> Calcd for C<sub>21</sub>H<sub>23</sub>NO<sub>2</sub>: 321.1729, found 321.1725. HPLC (AD-H, 2-propanol /n-hexane = 10/90, flow rate = 1.0 mL/min, λ = 254 nm) tR = 12.2 min (major), 18.7 min (minor). [α]<sub>D</sub><sup>20</sup> = -88.0 (*c* = 0.5, CHCl<sub>3</sub>).

<Chromatogram>  
mAU

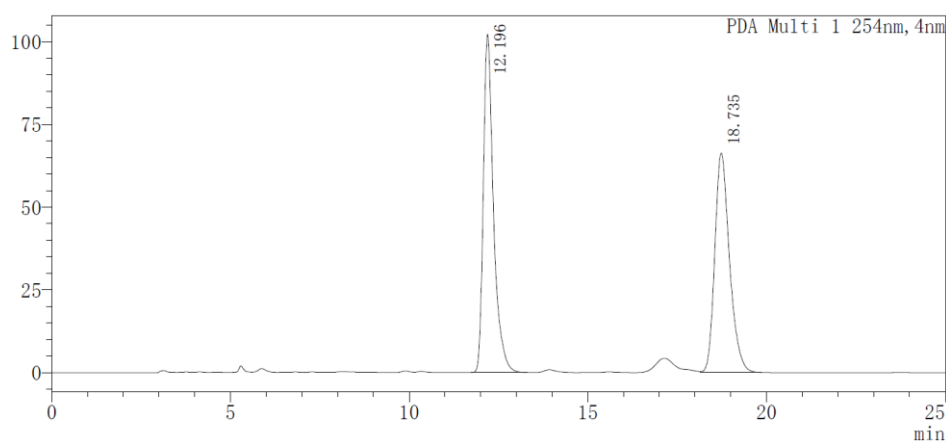

<Peak Table>

PDA Ch1 254nm

| No.   | Ret. Time (min) | Height (mAU) | Height% | Area (mAU*min) | Area%   |
|-------|-----------------|--------------|---------|----------------|---------|
| 1     | 12.196          | 102184       | 60.648  | 2020571        | 51.596  |
| 2     | 18.735          | 66303        | 39.352  | 1895555        | 48.404  |
| Total |                 | 168487       | 100.000 | 3916127        | 100.000 |

<Chromatogram>  
mAU

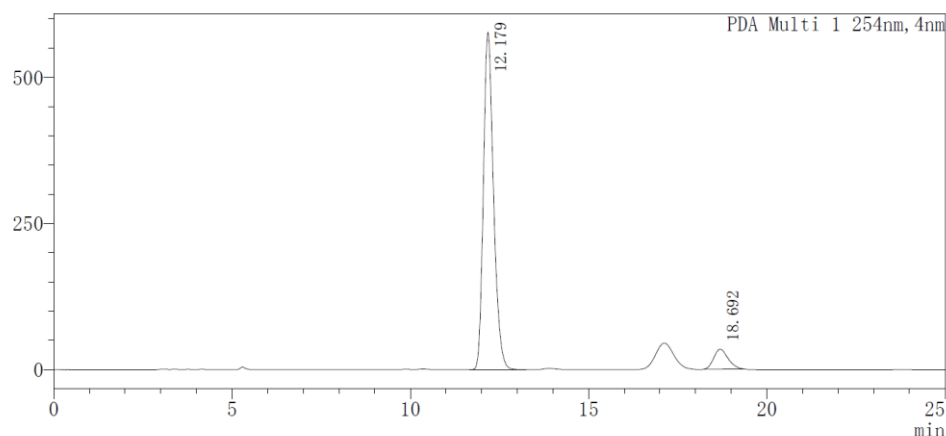

<Peak Table>

PDA Ch1 254nm

| No.   | Ret. Time (min) | Height (mAU) | Height% | Area (mAU*min) | Area%   |
|-------|-----------------|--------------|---------|----------------|---------|
| 1     | 12.179          | 576666       | 94.412  | 11405116       | 92.335  |
| 2     | 18.692          | 34129        | 5.588   | 946720         | 7.665   |
| Total |                 | 610795       | 100.000 | 12351837       | 100.000 |

**(*R*)-2-(4-methoxybenzyl)-4-methyl-4-(2-methylallyl)-3,4-dihydroisoquinolin-1(2H)-one (5c)**

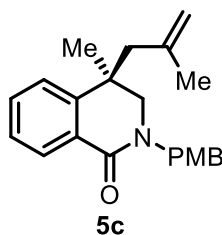

Prepared according to typical procedure from **2w** (100.8 mg, 0.6 mmol), *N*-allyl carboxamide **4a** (84.3 mg, 0.2 mmol), after a flash column chromatography (hexanes: EA = 20:1-10:1) afforded the product **5c** as a yellow oil (26.3 mg, 40% yield) with 88% *ee*. **<sup>1</sup>H NMR** (400 MHz, CDCl<sub>3</sub>) δ 8.20 (dd, *J* = 7.7, 1.5 Hz, 1H), 7.48-7.44 (m, 1H), 7.39-7.35 (m, 1H), 7.32-7.28 (m, 2H), 7.25-7.23 (m, 1H), 6.90-6.86 (m, 2H), 4.97 (d, *J* = 14.3 Hz, 1H), 4.87-4.85 (m, 1H), 4.53-4.49 (m, 2H), 3.81 (s, 3H), 3.35 (d, *J* = 12.6 Hz, 2H), 3.19 (d, *J* = 12.6 Hz, 1H), 2.30 (d, *J* = 13.2 Hz, 1H), 2.18 (d, *J* = 13.2 Hz, 1H), 1.39 (dd, *J* = 1.5, 0.8 Hz, 3H), 1.30 (s, 3H); **<sup>13</sup>C NMR** (101 MHz, CDCl<sub>3</sub>) δ 164.2, 159.0, 145.2, 141.8, 131.7, 129.9, 129.0, 128.7, 128.2, 126.8, 124.6, 115.6, 113.9, 55.8, 55.2, 50.2, 47.0, 37.3, 24.7, 23.3. **HRMS** (EI): *m/z*: [M]<sup>+</sup> Calcd for C<sub>22</sub>H<sub>25</sub>NO<sub>2</sub>: 335.1885, found 335.1881. HPLC (OJ-H, 2-propanol /n-hexane = 10/90, flow rate =

1.0 mL/min,  $\lambda = 254\text{ nm}$ )  $t_R = 7.6\text{ min}$  (major),  $8.7\text{ min}$  (minor).  $[\alpha]_D^{20} = -53.0$  ( $c = 0.5$ ,  $\text{CHCl}_3$ ).

<Chromatogram>

mAU

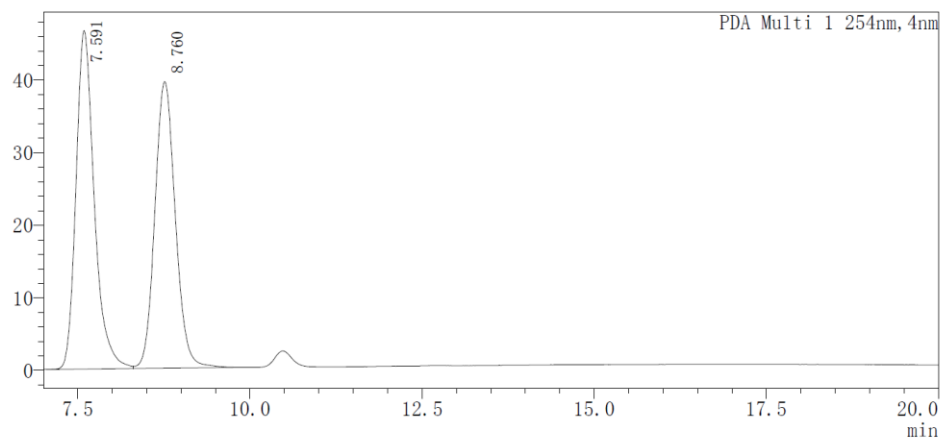

<Peak Table>

PDA Ch1 254nm

| No.   | Ret. Time (min) | Height (mAU) | Height% | Area (mAU*min) | Area%   |
|-------|-----------------|--------------|---------|----------------|---------|
| 1     | 7.591           | 46574        | 54.129  | 861555         | 51.356  |
| 2     | 8.760           | 39469        | 45.871  | 816061         | 48.644  |
| Total |                 | 86042        | 100.000 | 1677616        | 100.000 |

<Chromatogram>

mAU

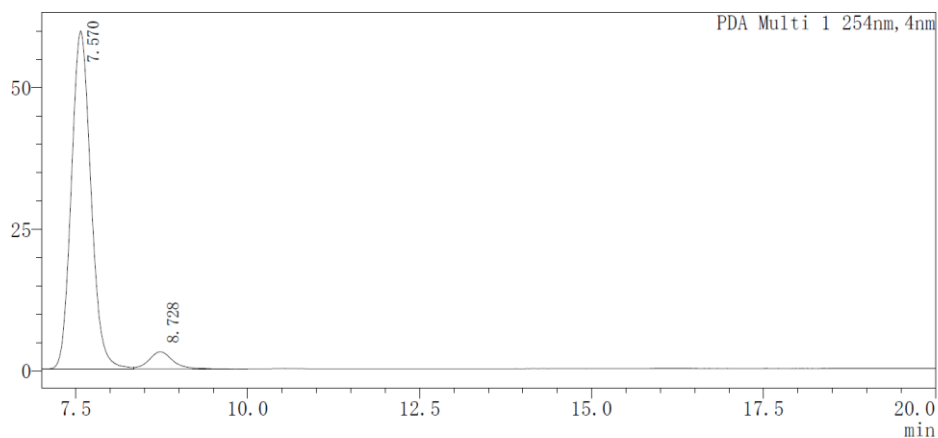

<Peak Table>

PDA Ch1 254nm

| No.   | Ret. Time (min) | Height (mAU) | Height% | Area (mAU*min) | Area%   |
|-------|-----------------|--------------|---------|----------------|---------|
| 1     | 7.570           | 59632        | 95.177  | 1178530        | 94.159  |
| 2     | 8.728           | 3022         | 4.823   | 73111          | 5.841   |
| Total |                 | 62654        | 100.000 | 1251641        | 100.000 |

**(*R*)-2-(4-methoxybenzyl)-4-methyl-4-(2-phenylallyl)-3,4-dihydroisoquinolin-1(2H)-one (5d)**

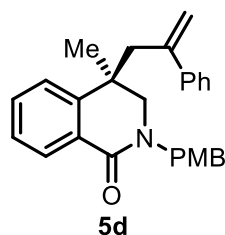

Prepared according to typical procedure from **2ab** (69.0 mg, 0.3 mmol), *N*-allyl carboxamide **4a** (84.3 mg, 0.2 mmol), after a flash column chromatography (hexanes: EA = 20:1-10:1) afforded the product **5d** as a yellow oil (39.5 mg, 50% yield) with 91% *ee*. **<sup>1</sup>H NMR** (400 MHz, CDCl<sub>3</sub>) δ 8.16 (dd, *J* = 7.7, 1.6 Hz, 1H), 7.40 (td, *J* = 7.5, 1.6 Hz, 1H), 7.35-7.28 (m, 6H), 7.19-7.12 (m, 3H), 6.85-6.80 (m, 2H), 5.27 (d, *J* = 1.7 Hz, 1H), 5.05 (d, *J* = 14.3 Hz, 1H), 4.85 (d, *J* = 1.7 Hz, 1H), 3.79 (s, 3H), 3.56 (d, *J* = 14.4 Hz, 1H), 3.15 (d, *J* = 12.8 Hz, 1H), 2.98 (d, *J* = 12.7 Hz, 1H), 2.81-2.72 (m, 2H), 1.17 (s, 3H); **<sup>13</sup>C NMR** (101 MHz, CDCl<sub>3</sub>) δ 164.1, 158.9, 145.6, 145.2, 142.6, 131.7, 129.8, 129.0, 128.6, 128.4, 128.1, 127.4, 126.8, 126.4, 124.2, 118.1, 113.8, 55.2, 54.7, 49.7, 44.8, 37.7, 23.0. **HRMS** (EI): *m/z*: [M]<sup>+</sup> Calcd for C<sub>27</sub>H<sub>27</sub>NO<sub>2</sub>: 397.2042, found 397.2038. HPLC (OZ-H, 2-propanol /n-hexane = 10/90, flow rate = 1.0 mL/min, λ = 254 nm) t<sub>R</sub> = 27.5 min (major), 40.4 min (minor). [α]<sub>D</sub><sup>20</sup> = -59.4 (*c* = 0.5, CHCl<sub>3</sub>).

<Chromatogram>  
mAU

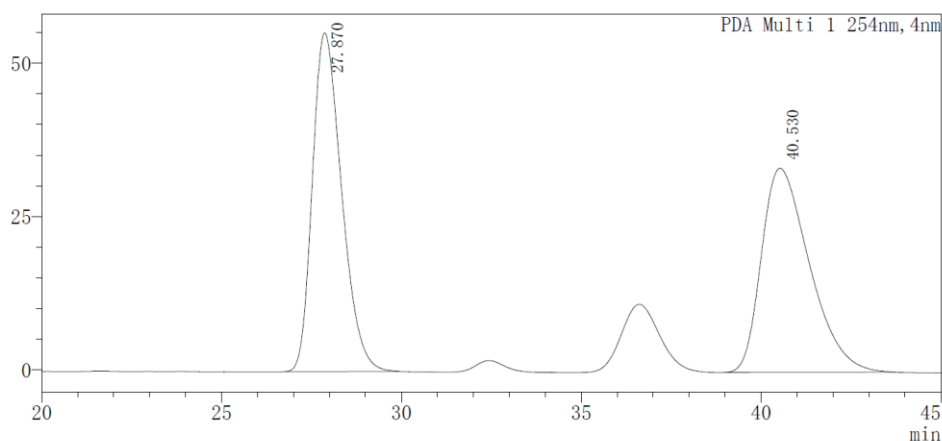

<Peak Table>

PDA Ch1 254nm

| No.   | Ret. Time (min) | Height (mAU) | Height% | Area (mAU*min) | Area%   |
|-------|-----------------|--------------|---------|----------------|---------|
| 1     | 27.870          | 55218        | 62.407  | 3123117        | 50.269  |
| 2     | 40.530          | 33262        | 37.593  | 3089730        | 49.731  |
| Total |                 | 88480        | 100.000 | 6212847        | 100.000 |

<Chromatogram>

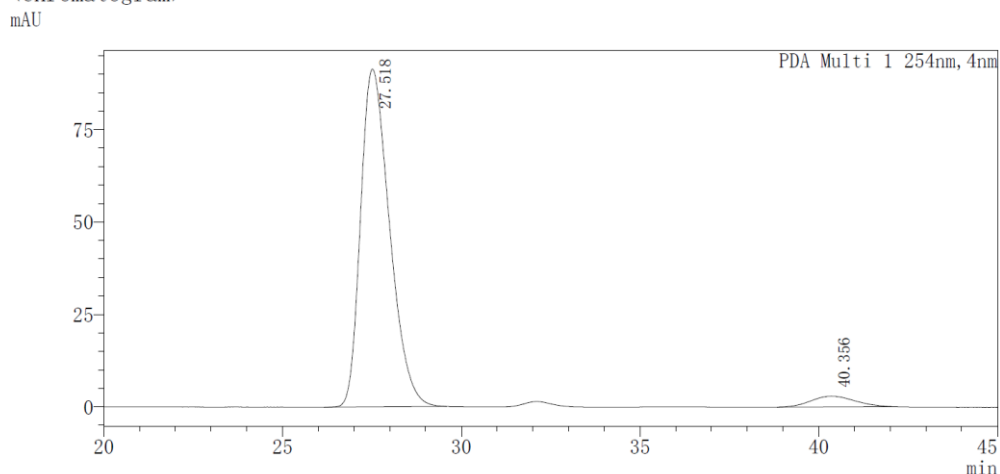

<Peak Table>

PDA Ch1 254nm

| No.   | Ret. Time (min) | Height (mAU) | Height% | Area (mAU*min) | Area%   |
|-------|-----------------|--------------|---------|----------------|---------|
| 1     | 27.518          | 91395        | 96.899  | 5154744        | 95.395  |
| 2     | 40.356          | 2924         | 3.101   | 248829         | 4.605   |
| Total |                 | 94320        | 100.000 | 5403574        | 100.000 |

**Ethyl(*R,E*)-4-(2-(4-methoxybenzyl)-4-methyl-1-oxo-1,2,3,4-tetrahydroisoquinolin-4-yl)but-2-enoate (**5e**)**

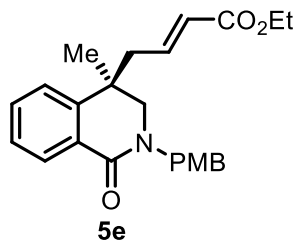

Prepared according to typical procedure from **2x** (67.8 mg, 0.3 mmol), *N*-allyl carboxamide **4a** (67.8 mg, 0.2 mmol), after a flash column chromatography (hexanes: EA = 20:1-10:1) afforded the product **5e** as a white solid (72.4 mg, 92% yield) with 82% *ee*, m.p.: 71.7-72.4 °C. <sup>1</sup>H NMR (400 MHz, CDCl<sub>3</sub>) δ 8.19 (dd, *J* = 7.8, 1.5 Hz, 1H), 7.48 (td, *J* = 7.6, 1.5 Hz, 1H), 7.38 (td, *J* = 7.6, 1.2 Hz, 1H), 7.31-7.27 (m, 2H), 7.22 (dd, *J* = 7.7, 1.2 Hz, 1H), 6.88-6.85 (m, 2H), 6.60-6.52 (m, 1H), 5.58 (dt, *J* = 15.5, 1.4 Hz, 1H), 4.80 (d, *J* = 14.3 Hz, 1H), 4.60 (d, *J* = 14.3 Hz, 1H), 4.16 (q, *J* = 7.1 Hz, 2H), 3.79 (s, 3H), 3.33 (d, *J* = 12.7 Hz, 1H), 3.17 (d, *J* = 12.7 Hz, 1H), 2.34-2.31 (m, 2H), 1.28 (t, *J* = 7.1 Hz, 3H), 1.26 (s, 3H); <sup>13</sup>C NMR (101 MHz, CDCl<sub>3</sub>) δ 165.8, 163.9, 159.1, 144.4, 143.2, 132.0, 129.9, 128.9, 128.8, 128.1, 127.1, 124.7, 123.9, 114.0, 60.2, 55.1, 54.6, 49.7, 41.7, 37.1, 22.7, 14.1. HRMS (EI): *m/z*: [M]<sup>+</sup> Calcd for C<sub>24</sub>H<sub>27</sub>NO<sub>2</sub>: 393.1940, found 393.1938. HPLC (AD-H, 2-propanol /n-hexane = 10/90, flow rate =

1.0 mL/min,  $\lambda = 254\text{ nm}$ ) tR = 20.2 min (major), 23.7 min (minor).  $[\alpha]_D^{20} = -119.3$  ( $c = 0.5$ ,  $\text{CHCl}_3$ ).

<Chromatogram>  
mAU

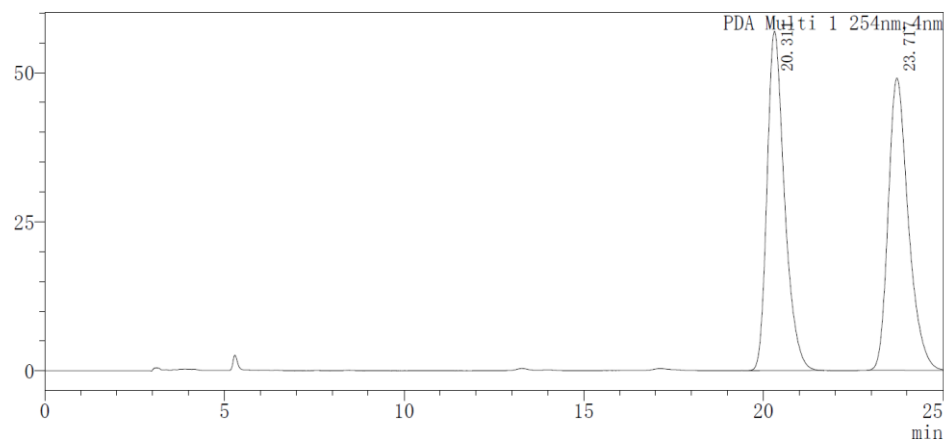

<Peak Table>

PDA Ch1 254nm

| No.   | Ret. Time (min) | Height (mAU) | Height% | Area (mAU*min) | Area%   |
|-------|-----------------|--------------|---------|----------------|---------|
| 1     | 20.311          | 56882        | 53.718  | 1921803        | 50.187  |
| 2     | 23.717          | 49008        | 46.282  | 1907504        | 49.813  |
| Total |                 | 105890       | 100.000 | 3829307        | 100.000 |

<Chromatogram>  
mAU

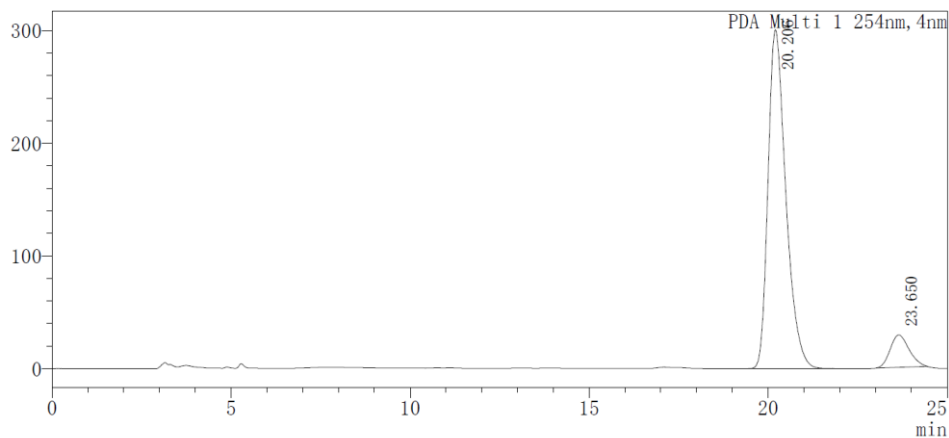

<Peak Table>

PDA Ch1 254nm

| No.   | Ret. Time (min) | Height (mAU) | Height% | Area (mAU*min) | Area%   |
|-------|-----------------|--------------|---------|----------------|---------|
| 1     | 20.206          | 300790       | 91.268  | 10406128       | 90.802  |
| 2     | 23.650          | 28777        | 8.732   | 1054133        | 9.198   |
| Total |                 | 329567       | 100.000 | 11460261       | 100.000 |



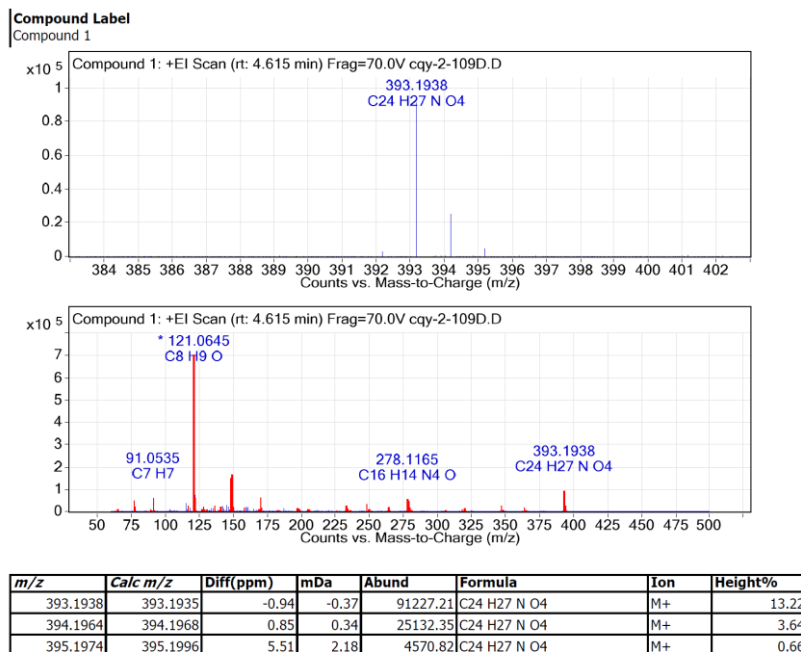

**(*R*)-4-(cyclopent-1-en-1-ylmethyl)-2-(4-methoxybenzyl)-4-methyl-3,4-dihydroisoquinolin-1(2H)-one (5f)**

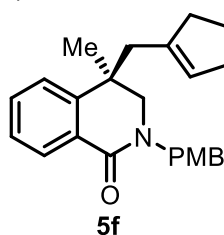

Prepared according to typical procedure from **2z** (116.4 mg, 0.6 mmol), *N*-allyl carboxamide **4a** (84.3 mg, 0.2 mmol), after a flash column chromatography (hexanes: EA = 20:1-10:1) afforded the product **5f** as a yellow oil (48.0 mg, 66% yield) with 91% *ee*. **<sup>1</sup>H NMR** (400 MHz, CDCl<sub>3</sub>) δ 8.19 (dd, *J* = 7.7, 1.5 Hz, 1H), 7.45 (td, *J* = 7.5, 1.5 Hz, 1H), 7.36 (td, *J* = 7.5, 1.2 Hz, 1H), 7.32-7.29 (m, 2H), 7.22 (dd, *J* = 7.7, 1.3 Hz, 1H), 6.90-6.86 (m, 2H), 5.17 (d, *J* = 2.8 Hz, 1H), 4.94 (d, *J* = 14.3 Hz, 1H), 4.52 (d, *J* = 14.3 Hz, 1H), 3.81 (s, 3H), 3.31-3.20 (m, 2H), 2.32 (s, 2H), 2.26-2.18 (m, 2H), 1.99-1.93 (m, 1H), 1.80-1.66 (m, 3H), 1.25 (s, 3H); **<sup>13</sup>C NMR** (101 MHz, CDCl<sub>3</sub>) δ 164.2, 159.0, 145.6, 140.1, 131.6, 129.9, 129.3, 129.0, 128.6, 128.1, 126.7, 124.3, 113.9, 55.4, 55.2, 50.1, 40.5, 37.2, 37.0, 32.4, 23.9, 23.7. **HRMS** (EI): *m/z*: [M]<sup>+</sup> Calcd for C<sub>24</sub>H<sub>27</sub>NO<sub>2</sub>: 361.2042, found 361.2037. HPLC (OJ-H, 2-propanol /*n*-hexane = 10/90, flow rate = 0.5 mL/min, *l* = 254 nm) *t*<sub>R</sub> = 15.9 min (major), 17.7 min (minor). [*α*]<sub>D</sub><sup>20</sup> = -51.9 (*c* = 0.5, CHCl<sub>3</sub>).

<Chromatogram>

mAU

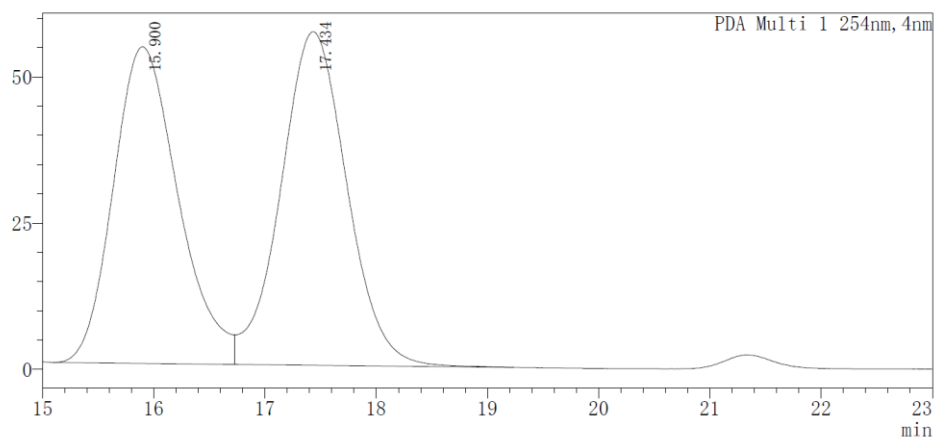

<Peak Table>

PDA Ch1 254nm

| No.   | Ret. Time (min) | Height (mAU) | Height% | Area (mAU*min) | Area%   |
|-------|-----------------|--------------|---------|----------------|---------|
| 1     | 15.900          | 54106        | 48.701  | 2195957        | 48.246  |
| 2     | 17.434          | 56991        | 51.299  | 2355622        | 51.754  |
| Total |                 | 111097       | 100.000 | 4551579        | 100.000 |

<Chromatogram>

mAU

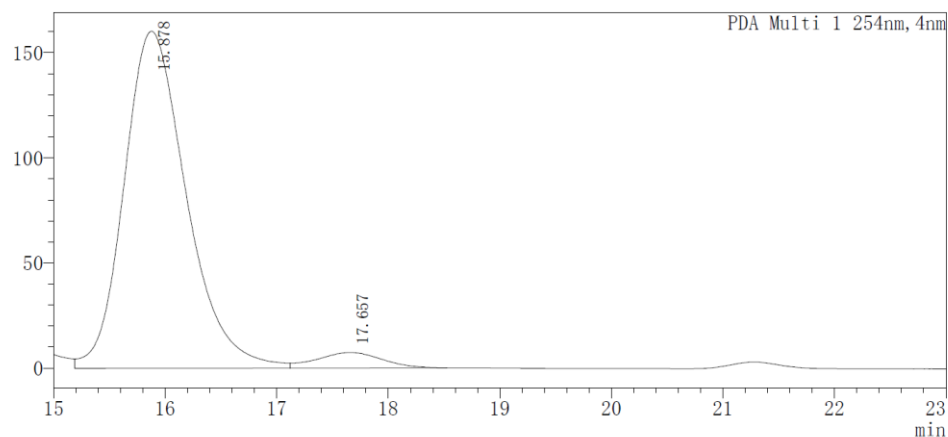

<Peak Table>

PDA Ch1 254nm

| No.   | Ret. Time (min) | Height (mAU) | Height% | Area (mAU*min) | Area%   |
|-------|-----------------|--------------|---------|----------------|---------|
| 1     | 15.878          | 160326       | 95.603  | 6216114        | 95.431  |
| 2     | 17.657          | 7373         | 4.397   | 297607         | 4.569   |
| Total |                 | 167699       | 100.000 | 6513721        | 100.000 |

**(R)-2-(4-methoxybenzyl)-4-methyl-4-(3-methylbut-2-en-1-yl)-3,4-dihydroisoquinolin-1(2H)-one**  
**(5g)**

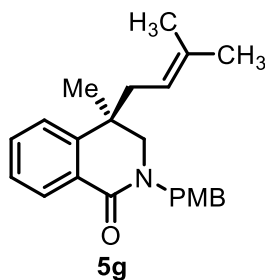

Prepared according to typical procedure from **2aa** (109.2 mg, 0.6 mmol), *N*-allyl carboxamide **4a** (84.3 mg, 0.2 mmol), after a flash column chromatography (hexanes: EA = 20:1-10:1) afforded the product **5g** as a white solid (44.7 mg, 64% yield) with 90% *ee*, m.p.: 68.8-69.6 °C. **<sup>1</sup>H NMR** (400 MHz, CDCl<sub>3</sub>) δ 8.19 (dd, *J* = 7.7, 1.5 Hz, 1H), 7.46 (td, *J* = 7.5, 1.5 Hz, 1H), 7.36 (td, *J* = 7.6, 1.3 Hz, 1H), 7.32-7.28 (m, 2H), 7.22 (dd, *J* = 7.7, 1.2 Hz, 1H), 6.90-6.86 (m, 2H), 4.85-4.82 (m, 1H), 4.79 (d, *J* = 14.3 Hz, 1H), 4.65 (d, *J* = 14.3 Hz, 1H), 3.80 (s, 3H), 3.29-3.19 (m, 2H), 2.24-2.11 (m, 2H), 1.64 (d, *J* = 1.4 Hz, 3H), 1.41 (d, *J* = 1.4 Hz, 3H), 1.20 (s, 3H); **<sup>13</sup>C NMR** (101 MHz, CDCl<sub>3</sub>) δ 164.1, 159.0, 145.6, 134.8, 131.6, 129.9, 129.1, 128.6, 128.3, 126.6, 124.2, 118.9, 113.9, 55.2, 54.9, 50.0, 37.6 (two peaks overlap), 25.8, 22.9, 17.6. **HRMS** (EI): *m/z*: [M]<sup>+</sup> Calcd for C<sub>23</sub>H<sub>27</sub>NO<sub>2</sub>: 349.2042, found 349.2040. HPLC (AD-H, 2-propanol /n-hexane = 10/90, flow rate = 1.0 mL/min, λ = 254 nm) t<sub>R</sub> = 11.1 min (major), 20.7 min (minor). [α]<sub>D</sub><sup>20</sup> = -30.1 (*c* = 0.5, CHCl<sub>3</sub>).

<Chromatogram>  
mAU

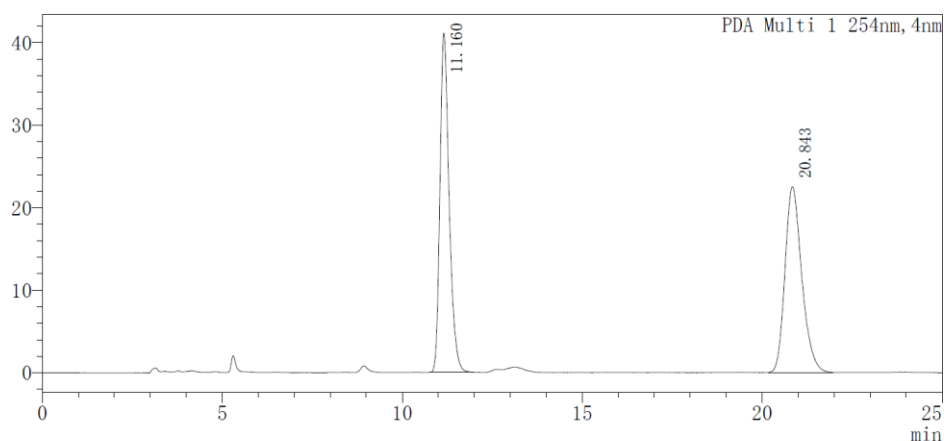

<Peak Table>

PDA Ch1 254nm

| No.   | Ret. Time (min) | Height (mAU) | Height% | Area (mAU*min) | Area%   |
|-------|-----------------|--------------|---------|----------------|---------|
| 1     | 11.160          | 41085        | 64.610  | 730446         | 50.036  |
| 2     | 20.843          | 22504        | 35.390  | 729405         | 49.964  |
| Total |                 | 63589        | 100.000 | 1459851        | 100.000 |

<Chromatogram>

mAU

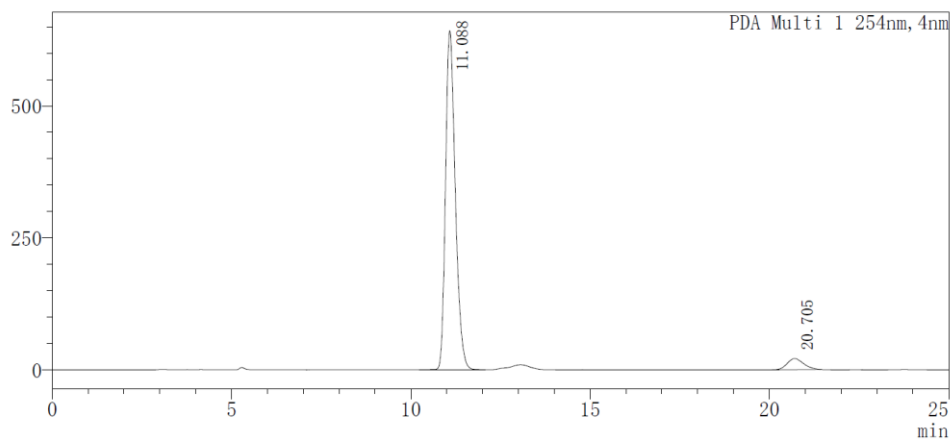

<Peak Table>

PDA Ch1 254nm

| No.   | Ret. Time (min) | Height (mAU) | Height% | Area (mAU*min) | Area%   |
|-------|-----------------|--------------|---------|----------------|---------|
| 1     | 11.088          | 642269       | 96.841  | 12172470       | 94.813  |
| 2     | 20.705          | 20950        | 3.159   | 665980         | 5.187   |
| Total |                 | 663219       | 100.000 | 12838450       | 100.000 |

Compound Label

Compound 1

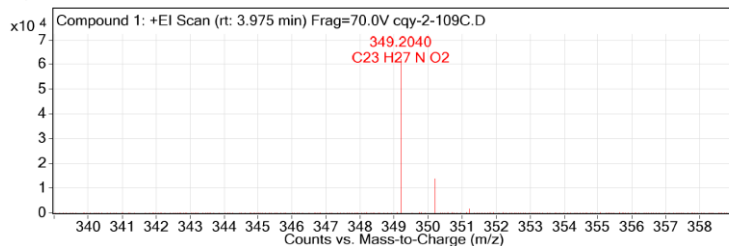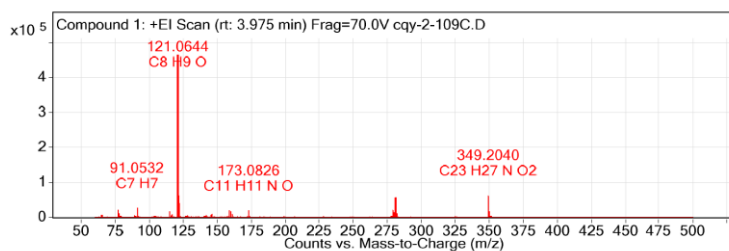

| m/z      | Calc m/z | Diff(ppm) | mDa   | Abund    | Formula      | Ion | Height% |
|----------|----------|-----------|-------|----------|--------------|-----|---------|
| 349.204  | 349.2036 | -0.93     | -0.32 | 62095.01 | C23 H27 N O2 | M+  | 14.12   |
| 350.205  | 350.2069 | 5.44      | 1.9   | 13793.77 | C23 H27 N O2 | M+  | 3.14    |
| 351.2095 | 351.21   | 1.39      | 0.49  | 1682.69  | C23 H27 N O2 | M+  | 0.38    |

**(R)-4-cinnamyl-2-(4-methoxybenzyl)-4-methyl-3,4-dihydroisoquinolin-1(2H)-one (5h)**

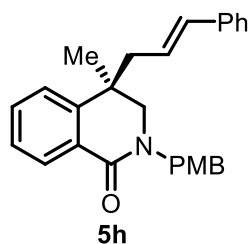

S64

Prepared according to typical procedure from **2aa** (69.0 mg, 0.3 mmol), *N*-allyl carboxamide **4a** (84.3 mg, 0.2 mmol), after a flash column chromatography (hexanes: EA = 20:1-10:1) afforded the product **5h** as a white solid (70.1 mg, 88% yield) with 86% *ee*, m.p.: 77.1-77.6 °C. **<sup>1</sup>H NMR** (400 MHz, CDCl<sub>3</sub>) δ 8.26 (dd, *J* = 7.8, 1.5 Hz, 1H), 7.51 (td, *J* = 7.5, 1.5 Hz, 1H), 7.41 (td, *J* = 7.6, 1.2 Hz, 1H), 7.38-7.28 (m, 5H), 7.26-7.22 (m, 3H), 6.94-6.87 (m, 2H), 6.20 (d, *J* = 15.7 Hz, 1H), 5.79-5.72 (m, 1H), 4.91 (d, *J* = 14.3 Hz, 1H), 4.60 (d, *J* = 14.3 Hz, 1H), 3.79 (s, 3H), 3.36 (d, *J* = 12.6 Hz, 1H), 3.25 (d, *J* = 12.7 Hz, 1H), 2.42-2.31 (m, 2H), 1.29 (s, 3H); **<sup>13</sup>C NMR** (101 MHz, CDCl<sub>3</sub>) δ 164.1, 159.0, 145.4, 137.0, 133.5, 131.9, 130.0, 129.1, 128.7, 128.4, 128.1, 127.2, 126.8, 126.0, 124.8, 124.0, 113.9, 55.1, 54.3, 49.7, 42.8, 37.4, 22.5. **HRMS** (EI): *m/z*: [M]<sup>+</sup> Calcd for C<sub>27</sub>H<sub>27</sub>NO<sub>2</sub>: 397.2042, found 397.2040. HPLC (AD-H, 2-propanol /*n*-hexane = 10/90, flow rate = 1.0 mL/min, λ = 254 nm) t<sub>R</sub> = 19.4 min (major), 22.8 min (minor). [α]<sub>D</sub><sup>20</sup> = -117.1 (*c* = 0.5, CHCl<sub>3</sub>).

<Chromatogram>  
mAU

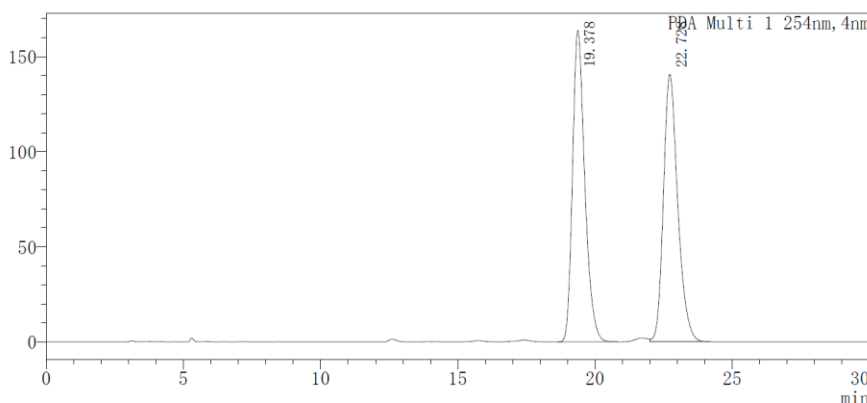

<Peak Table>

PDA Ch1 254nm

| No.   | Ret. Time (min) | Height (mAU) | Height% | Area (mAU*min) | Area%   |
|-------|-----------------|--------------|---------|----------------|---------|
| 1     | 19.378          | 163731       | 53.784  | 5095278        | 49.954  |
| 2     | 22.728          | 140694       | 46.216  | 5104709        | 50.046  |
| Total |                 | 304426       | 100.000 | 10199988       | 100.000 |

# <Chromatogram>

mAU

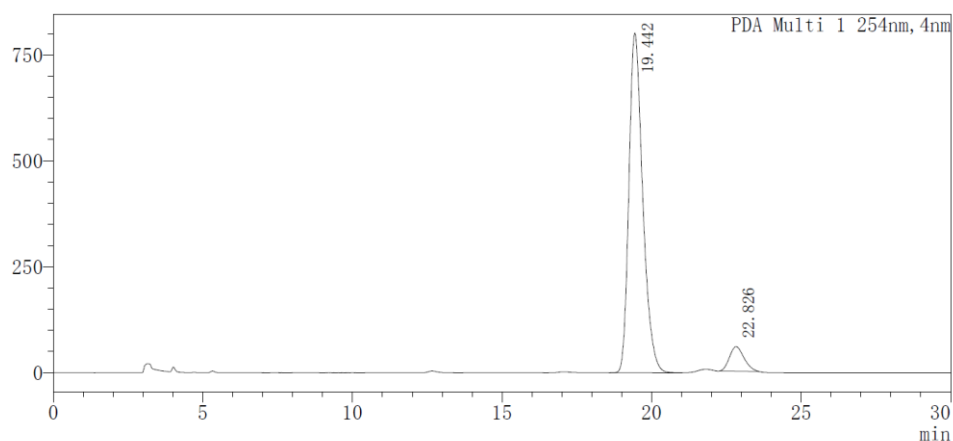

# <Peak Table>

PDA Ch1 254nm

| No.   | Ret. Time (min) | Height (mAU) | Height% | Area (mAU*min) | Area%   |
|-------|-----------------|--------------|---------|----------------|---------|
| 1     | 19.442          | 801427       | 93.245  | 25737916       | 92.881  |
| 2     | 22.826          | 58059        | 6.755   | 1972711        | 7.119   |
| Total |                 | 859486       | 100.000 | 27710627       | 100.000 |

## Compound Label

Compound 1

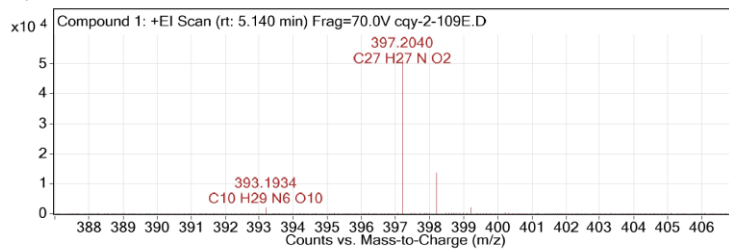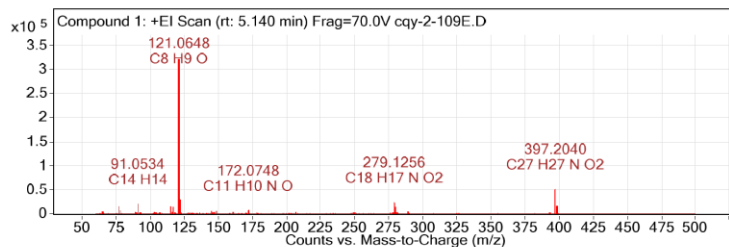

| m/z      | Calc m/z | Diff(ppm) | mDa   | Abund    | Formula                                          | Ion | Height% |
|----------|----------|-----------|-------|----------|--------------------------------------------------|-----|---------|
| 397.204  | 397.2036 | -0.86     | -0.34 | 51171.35 | C <sub>27</sub> H <sub>27</sub> N O <sub>2</sub> | M+  | 16      |
| 398.2074 | 398.2069 | -1.13     | -0.45 | 13557.43 | C <sub>27</sub> H <sub>27</sub> N O <sub>2</sub> | M+  | 4.24    |
| 399.2137 | 399.21   | -9.08     | -3.62 | 2045.95  | C <sub>27</sub> H <sub>27</sub> N O <sub>2</sub> | M+  | 0.64    |

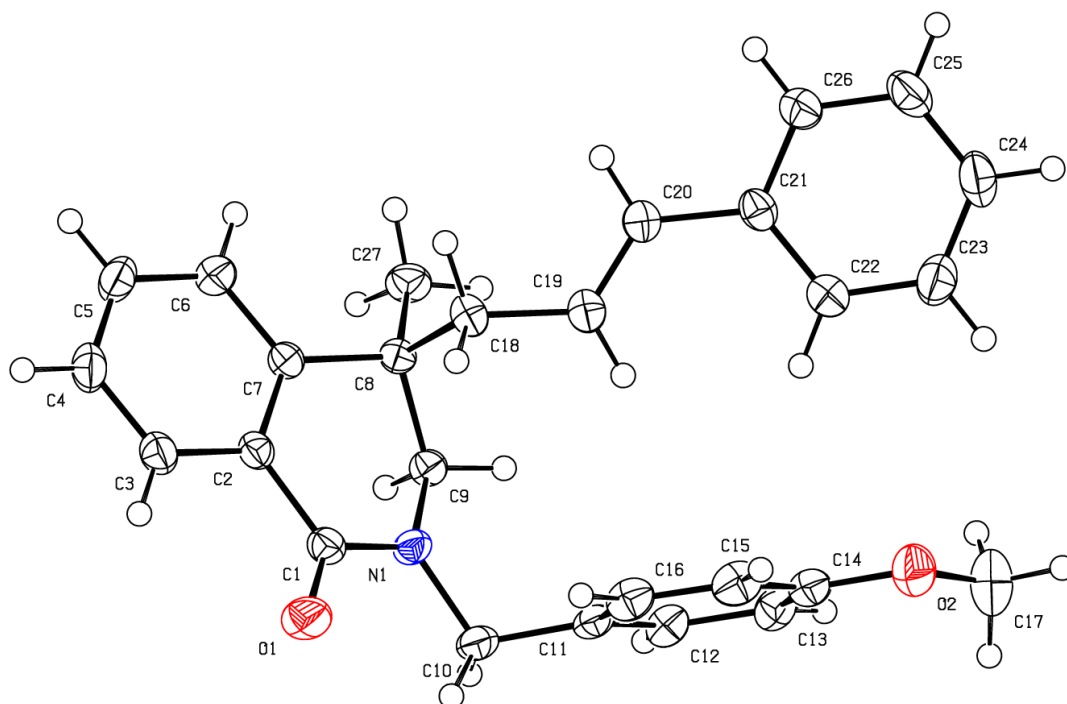

**Figure S1.** ORTEP drawing of **5h** (thermal ellipsoids set at 50% probability).

Recrystallization from pentane/ $\text{CH}_2\text{Cl}_2$  afforded single crystals suitable for X-ray diffraction analysis, which allowed determination of the absolute configurations of the stereocenters generated by the hydroacylation.<sup>[6]</sup>

**Table S6.** Crystal data and structure refinement for ga\_200917ca\_a.

|                                   |                                                   |          |
|-----------------------------------|---------------------------------------------------|----------|
| Identification code               | ga_200917ca_a                                     |          |
| Empirical formula                 | C <sub>27</sub> H <sub>27</sub> N O <sub>2</sub>  |          |
| Formula weight                    | 397.49                                            |          |
| Temperature                       | 173(2) K                                          |          |
| Wavelength                        | 1.34138 Å                                         |          |
| Crystal system                    | Orthorhombic                                      |          |
| Space group                       | P2 <sub>1</sub> 2 <sub>1</sub> 2 <sub>1</sub>     |          |
| Unit cell dimensions              | a = 8.9356(4) Å                                   | a = 90 ° |
|                                   | b = 9.4799(4) Å                                   | b = 90 ° |
|                                   | c = 25.1950(11) Å                                 | g = 90 ° |
| Volume                            | 2134.23(16) Å <sup>3</sup>                        |          |
| Z                                 | 4                                                 |          |
| Density (calculated)              | 1.237 Mg/m <sup>3</sup>                           |          |
| Absorption coefficient            | 0.385 mm <sup>-1</sup>                            |          |
| F(000)                            | 848                                               |          |
| Crystal size                      | 0.160 x 0.090 x 0.050 mm <sup>3</sup>             |          |
| Theta range for data collection   | 4.335 to 58.493 °                                 |          |
| Index ranges                      | -11 ≤ h ≤ 11, -11 ≤ k ≤ 12, -32 ≤ l ≤ 32          |          |
| Reflections collected             | 34885                                             |          |
| Independent reflections           | 4579 [R(int) = 0.0395]                            |          |
| Completeness to theta = 53.594 °  | 99.9 %                                            |          |
| Absorption correction             | Semi-empirical from equivalents                   |          |
| Max. and min. transmission        | 0.752 and 0.624                                   |          |
| Refinement method                 | Full-matrix least-squares on F <sup>2</sup>       |          |
| Data / restraints / parameters    | 4579 / 0 / 273                                    |          |
| Goodness-of-fit on F <sup>2</sup> | 1.032                                             |          |
| Final R indices [I > 2σ(I)]       | R <sub>1</sub> = 0.0302, wR <sub>2</sub> = 0.0810 |          |
| R indices (all data)              | R <sub>1</sub> = 0.0308, wR <sub>2</sub> = 0.0816 |          |
| Absolute structure parameter      | -0.08(6)                                          |          |
| Extinction coefficient            | n/a                                               |          |
| Largest diff. peak and hole       | 0.223 and -0.181 e.Å <sup>-3</sup>                |          |



**(R)-2,4-dibenzyl-4-ethyl-3,4-dihydroisoquinolin-1(2H)-one (7a)**

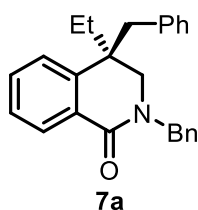

Prepared according to typical procedure from **2a** (61.2 mg, 0.3 mmol), *N*-allyl carboxamide **6a** (43.3 mg, 0.2 mmol), after a flash column chromatography (hexanes: EA = 20:1-10:1) afforded the product **7a** as a yellow oil (63.0 mg, 89% yield) with 87% *ee*. **<sup>1</sup>H NMR** (400 MHz, CDCl<sub>3</sub>) δ 8.29-8.27 (m, 1H), 7.44-7.31 (m, 7H), 7.19-7.13 (m, 3H), 6.86-6.83 (m, 1H), 6.70-6.68 (m, 2H), 4.82 (d, *J* = 1.0 Hz, 2H), 3.50 (d, *J* = 12.6 Hz, 1H), 3.19 (d, *J* = 12.7 Hz, 1H), 2.95 (d, *J* = 13.4 Hz, 1H), 2.67 (d, *J* = 13.4 Hz, 1H), 1.82-1.74 (m, 2H), 0.82 (t, *J* = 7.5 Hz, 3H); **<sup>13</sup>C NMR** (101 MHz, CDCl<sub>3</sub>) δ 164.1, 142.8, 136.9, 136.7, 131.2, 130.6, 128.9, 128.6, 128.6, 127.7, 127.6, 127.0, 126.8, 126.4, 125.7, 53.3, 51.0, 44.0, 41.0, 26.8, 8.3. **HRMS** (EI): *m/z*: [M]<sup>+</sup> Calcd for C<sub>25</sub>H<sub>25</sub>NO: 355.1936, found 355.1929. HPLC (AD-H, 2-propanol /*n*-hexane = 10/90, flow rate = 1.0 mL/min, λ = 254 nm) t<sub>R</sub> = 16.9 min (major), 31.0 min (minor). [α]<sub>D</sub><sup>20</sup> = -83.8 (*c* = 0.5, CHCl<sub>3</sub>).

<Chromatogram>  
mAU

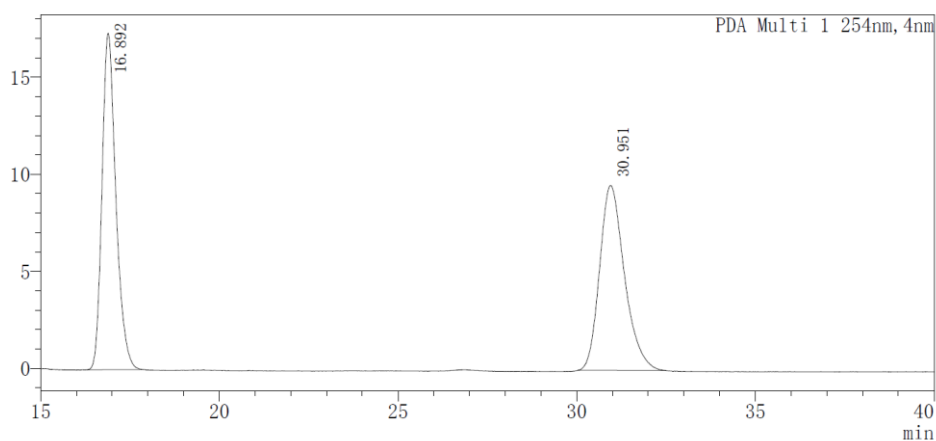

<Peak Table>

PDA Ch1 254nm

| No.   | Ret. Time (min) | Height (mAU) | Height% | Area (mAU*min) | Area%   |
|-------|-----------------|--------------|---------|----------------|---------|
| 1     | 16.892          | 17329        | 64.506  | 466828         | 50.281  |
| 2     | 30.951          | 9535         | 35.494  | 461618         | 49.719  |
| Total |                 | 26864        | 100.000 | 928445         | 100.000 |

<Chromatogram>  
mAU

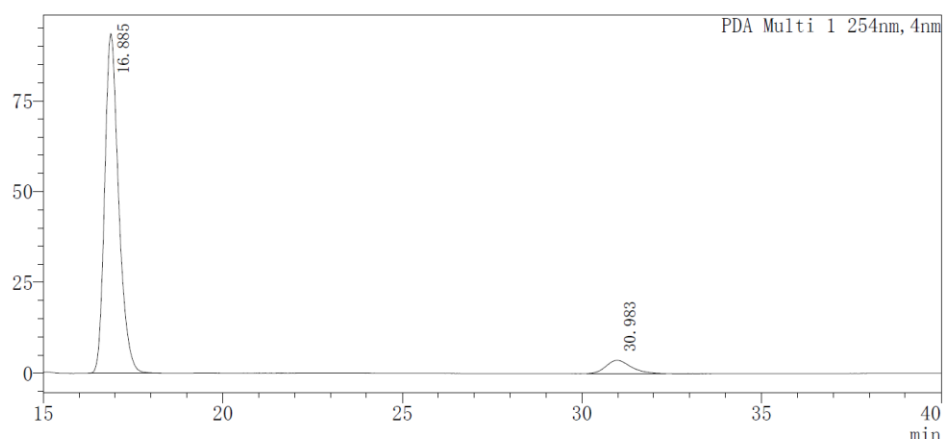

<Peak Table>

PDA Ch1 254nm

| No.   | Ret. Time (min) | Height (mAU) | Height% | Area (mAU*min) | Area%   |
|-------|-----------------|--------------|---------|----------------|---------|
| 1     | 16.885          | 93487        | 96.259  | 2534532        | 93.592  |
| 2     | 30.983          | 3633         | 3.741   | 173533         | 6.408   |
| Total |                 | 97119        | 100.000 | 2708066        | 100.000 |

**(R)-2,4-dibenzyl-4-propyl-3,4-dihydroisoquinolin-1(2H)-one (7b)**

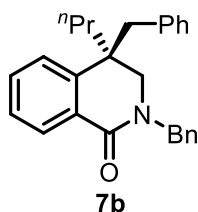

Prepared according to typical procedure from **2a** (61.2 mg, 0.3 mmol), *N*-allyl carboxamide **6b** (83.9 mg, 0.2 mmol), after a flash column chromatography (hexanes: EA = 20:1-10:1) afforded the product **7b** as a yellow oil (61.9 mg, 84% yield) with 94% *ee*. **<sup>1</sup>H NMR** (400 MHz, CDCl<sub>3</sub>) δ 8.29-8.25 (m, 1H), 7.41-7.29 (m, 7H), 7.20-7.14 (m, 3H), 6.87-6.83 (m, 1H), 6.70-6.67 (m, 2H), 4.81 (d, *J* = 1.8 Hz, 2H), 3.49 (d, *J* = 12.6 Hz, 1H), 3.21 (d, *J* = 12.6 Hz, 1H), 2.96 (d, *J* = 13.4 Hz, 1H), 2.67 (d, *J* = 13.4 Hz, 1H), 1.69-1.52 (m, 2H), 1.27-1.15 (m, 2H), 0.88 (t, *J* = 7.3 Hz, 3H); **<sup>13</sup>C NMR** (101 MHz, CDCl<sub>3</sub>) δ 164.2, 143.3, 136.9, 136.7, 131.3, 130.6, 128.9, 128.7, 128.7, 127.8, 127.6 (two peaks overlap), 126.8, 126.4, 125.6, 53.8, 51.0, 44.2, 41.1, 36.7, 17.1, 14.6. **HRMS** (EI): *m/z*: [M]<sup>+</sup> Calcd for C<sub>26</sub>H<sub>27</sub>NO: 369.2093, found 369.2093. HPLC (AD-H, 2-propanol /*n*-hexane = 10/90, flow rate = 1.0 mL/min, λ = 254 nm) t<sub>R</sub> = 15.1 min (major), 21.1 min (minor). [α]<sub>D</sub><sup>20</sup> = -106.5 (*c* = 0.5, CHCl<sub>3</sub>).

<Chromatogram>

mAU

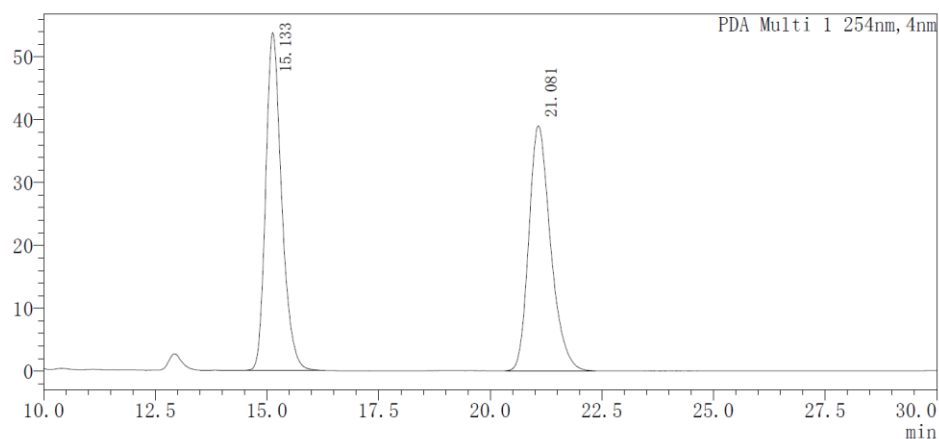

<Peak Table>

PDA Ch1 254nm

| No.   | Ret. Time(min) | Height (mAU) | Height% | Area (mAU*min) | Area%   |
|-------|----------------|--------------|---------|----------------|---------|
| 1     | 15.133         | 53730        | 57.957  | 1334823        | 50.204  |
| 2     | 21.081         | 38977        | 42.043  | 1323979        | 49.796  |
| Total |                | 92707        | 100.000 | 2658802        | 100.000 |

<Chromatogram>

mAU

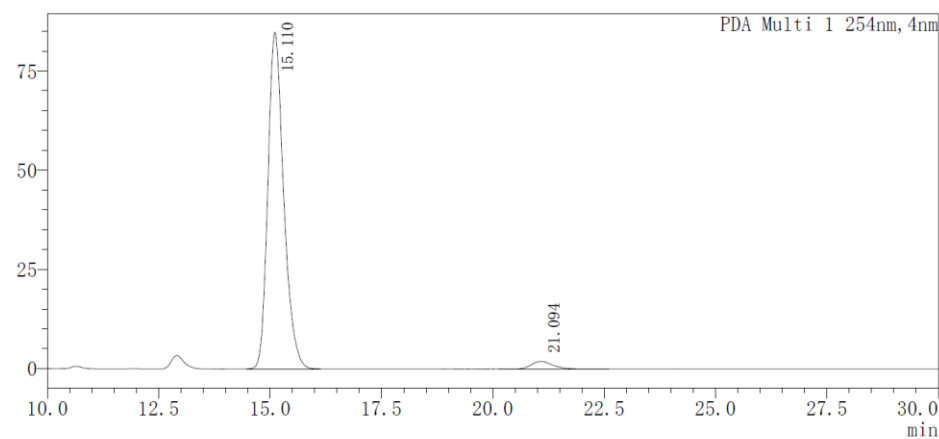

<Peak Table>

PDA Ch1 254nm

| No.   | Ret. Time(min) | Height (mAU) | Height% | Area (mAU*min) | Area%   |
|-------|----------------|--------------|---------|----------------|---------|
| 1     | 15.110         | 84894        | 97.755  | 2100611        | 97.027  |
| 2     | 21.094         | 1950         | 2.245   | 64364          | 2.973   |
| Total |                | 86844        | 100.000 | 2164975        | 100.000 |

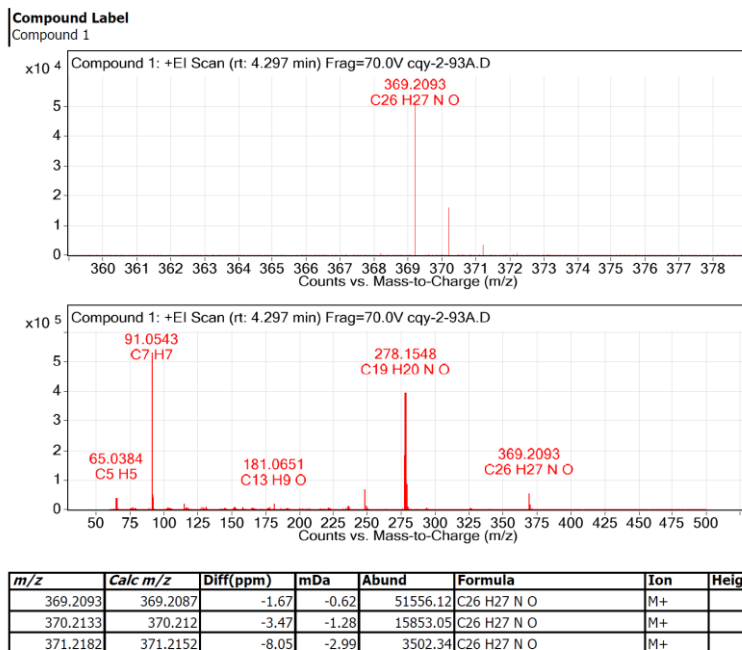

**(R)-2,4-dibenzyl-4-butyl-3,4-dihydroisoquinolin-1(2H)-one (7c)**

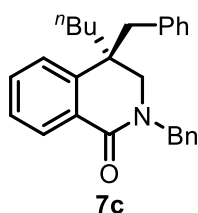

Prepared according to typical procedure from **2a** (61.2 mg, 0.3 mmol), *N*-allyl carboxamide **6c** (86.7 mg, 0.2 mmol), after a flash column chromatography (hexanes: EA = 20:1-10:1) afforded the product **7c** as a yellow oil (42.8 mg, 56% yield) with 93% *ee*. **<sup>1</sup>H NMR** (400 MHz, CDCl<sub>3</sub>) δ 8.33-8.25 (m, 1H), 7.43-7.30 (m, 7H), 7.17 (q, *J* = 6.8, 6.1 Hz, 3H), 6.89-6.83 (m, 1H), 6.73-6.65 (m, 2H), 4.90-4.74 (m, 2H), 3.50 (d, *J* = 12.6 Hz, 1H), 3.22 (d, *J* = 12.6 Hz, 1H), 2.97 (d, *J* = 13.4 Hz, 1H), 2.68 (d, *J* = 13.4 Hz, 1H), 1.74-1.53 (m, 2H), 1.32-1.22 (m, 2H), 1.22-1.10 (m, 2H), 0.87 (t, *J* = 7.1 Hz, 3H); **<sup>13</sup>C NMR** (101 MHz, CDCl<sub>3</sub>) δ 164.1, 143.2, 136.9, 136.7, 131.2, 130.5, 128.9, 128.7, 128.6, 128.6, 127.7, 127.5, 126.8, 126.3, 125.6, 53.7, 51.0, 44.1, 40.9, 34.2, 25.9, 23.3, 13.9. **HRMS** (EI): *m/z*: [M]<sup>+</sup> Calcd for C<sub>27</sub>H<sub>29</sub>NO: 383.2249, found 383.2243. HPLC (AD-H, 2-propanol /*n*-hexane = 10/90, flow rate = 1.0 mL/min, *l* = 254 nm) tR = 12.4 min (major), 15.3 min (minor). [α]<sub>D</sub><sup>20</sup> = -90.3 (*c* = 0.5, CHCl<sub>3</sub>).

<Chromatogram>

mAU

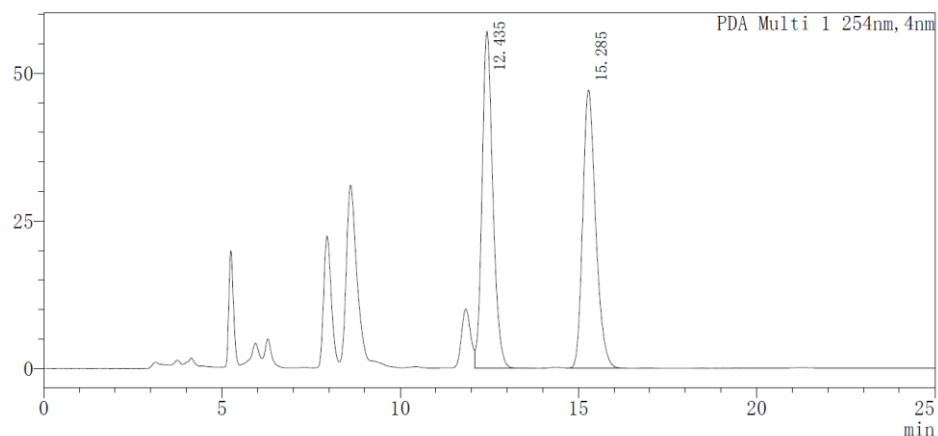

<Peak Table>

PDA Ch1 254nm

| No.   | Ret. Time (min) | Height (mAU) | Height% | Area (mAU*min) | Area%   |
|-------|-----------------|--------------|---------|----------------|---------|
| 1     | 12.435          | 56995        | 54.742  | 1200344        | 50.266  |
| 2     | 15.285          | 47120        | 45.258  | 1187662        | 49.734  |
| Total |                 | 104115       | 100.000 | 2388006        | 100.000 |

<Chromatogram>

mAU

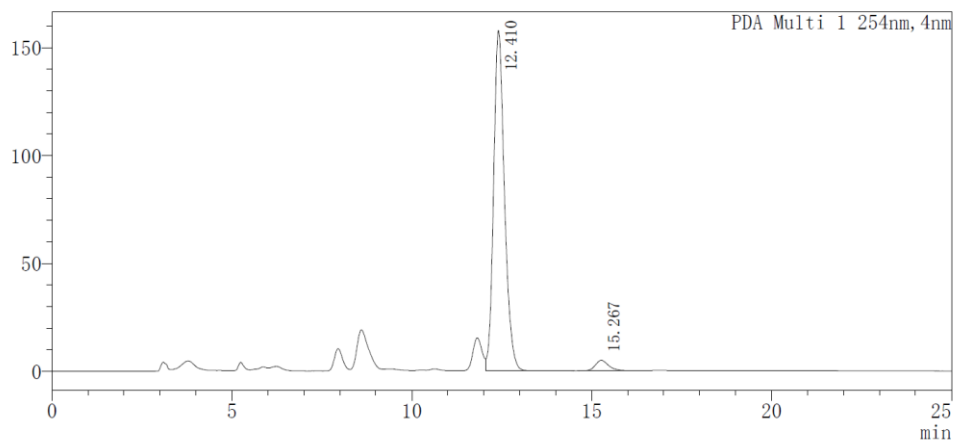

<Peak Table>

PDA Ch1 254nm

| No.   | Ret. Time (min) | Height (mAU) | Height% | Area (mAU*min) | Area%   |
|-------|-----------------|--------------|---------|----------------|---------|
| 1     | 12.410          | 157625       | 97.074  | 3314044        | 96.542  |
| 2     | 15.267          | 4751         | 2.926   | 118715         | 3.458   |
| Total |                 | 162376       | 100.000 | 3432759        | 100.000 |

**(R)-2,4-dibenzyl-4,6-dimethyl-3,4-dihydroisoquinolin-1(2H)-one (7d)**

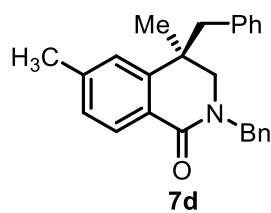

Prepared according to typical procedure from **2a** (61.2 mg, 0.3 mmol), *N*-allyl carboxamide **6d** (83.8 mg, 0.2 mmol), after a flash column chromatography (hexanes: EA = 20:1-10:1) afforded the product **7d** as a yellow oil (48.4 mg, 68% yield) with 94% *ee*. **<sup>1</sup>H NMR** (400 MHz, CDCl<sub>3</sub>)  $\delta$  8.10 (d, *J* = 2.0 Hz, 1H), 7.42 – 7.29 (m, 5H), 7.22 (dt, *J* = 7.0, 3.6 Hz, 4H), 6.85 (d, *J* = 7.9 Hz, 1H), 6.75 (dd, *J* = 7.2, 2.3 Hz, 2H), 5.00 (d, *J* = 14.4 Hz, 1H), 4.71 (d, *J* = 14.4 Hz, 1H), 3.37 (d, *J* = 12.6 Hz, 1H), 3.13 (d, *J* = 12.6 Hz, 1H), 2.86 (d, *J* = 13.2 Hz, 1H), 2.65 (d, *J* = 13.2 Hz, 1H), 2.44 (s, 3H), 1.22 (s, 3H); **<sup>13</sup>C NMR** (101 MHz, CDCl<sub>3</sub>)  $\delta$  164.6, 142.0, 137.0, 137.0, 136.6, 132.3, 130.5, 129.1, 128.6, 128.6, 127.8, 127.7, 127.5, 126.3, 124.8, 55.7, 50.8, 45.9, 37.6, 22.1, 21.0. **HRMS** (EI): *m/z*: [M]<sup>+</sup> Calcd for C<sub>25</sub>H<sub>25</sub>NO: 355.1936, found 355.1933. HPLC (AD-H, 2-propanol /n-hexane = 10/90, flow rate = 1.0 mL/min,  $\lambda$  = 254 nm) *t*<sub>R</sub> = 16.1 min (major), 35.3 min (minor). [ $\alpha$ ]<sub>D</sub><sup>20</sup> = -162.2 (*c* = 0.5, CHCl<sub>3</sub>).

<Chromatogram>  
mAU

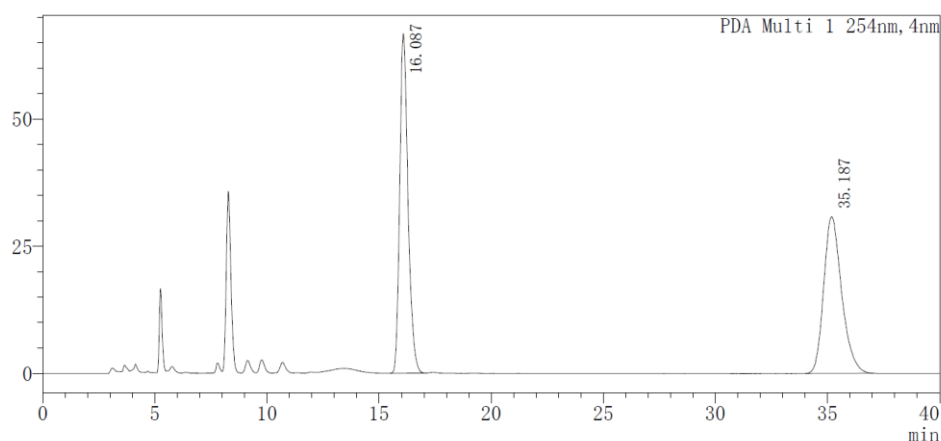

<Peak Table>

PDA Ch1 254nm

| No.   | Ret. Time (min) | Height (mAU) | Height% | Area (mAU*min) | Area%   |
|-------|-----------------|--------------|---------|----------------|---------|
| 1     | 16.087          | 66636        | 68.415  | 1720122        | 50.065  |
| 2     | 35.187          | 30764        | 31.585  | 1715627        | 49.935  |
| Total |                 | 97400        | 100.000 | 3435749        | 100.000 |

<Chromatogram>  
mAU

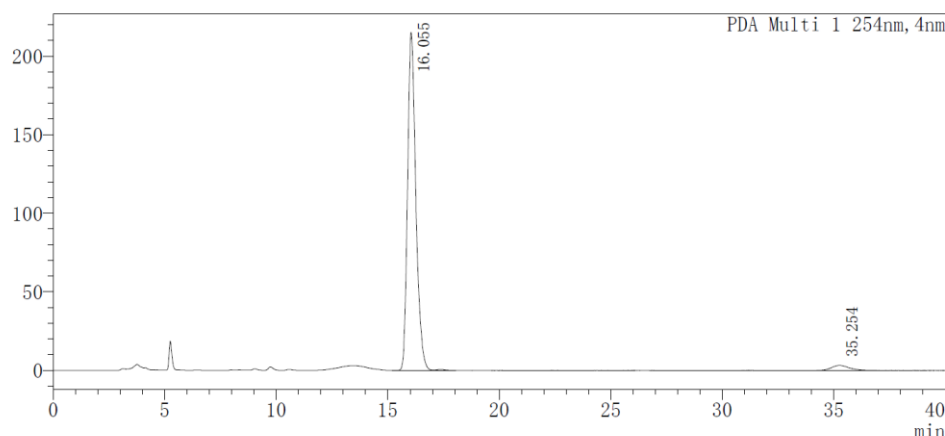

<Peak Table>

PDA Ch1 254nm

| No.   | Ret. Time (min) | Height (mAU) | Height% | Area (mAU*min) | Area%   |
|-------|-----------------|--------------|---------|----------------|---------|
| 1     | 16.055          | 215111       | 98.510  | 5575569        | 96.846  |
| 2     | 35.254          | 3254         | 1.490   | 181603         | 3.154   |
| Total |                 | 218364       | 100.000 | 5757172        | 100.000 |

**(*R*)-7,9-dibenzyl-9-methyl-8,9-dihydro-[1,3]dioxolo[4,5-*f*]isoquinolin-6(7*H*)-one (7e)**

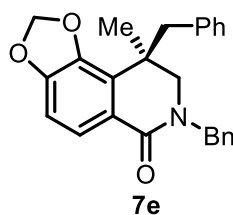

Prepared according to typical procedure from **2a** (61.2 mg, 0.3 mmol), *N*-allyl carboxamide **6e** (87.0 mg, 0.2 mmol), after a flash column chromatography (hexanes: EA = 10:1-5:1) afforded the product **7e** as a red solid (34.4 mg, 45% yield) with 93% *ee*, m.p.: 116.9 -117.7 °C. **<sup>1</sup>H NMR** (400 MHz, CDCl<sub>3</sub>) δ 7.43-7.40 (m, 2H), 7.37-7.28 (m, 3H), 7.21-7.15 (m, 3H), 6.77 (d, *J* = 8.1 Hz, 1H), 6.76-6.72 (m, 2H), 6.30 (d, *J* = 8.1 Hz, 1H), 6.22-6.13 (m, 2H), 4.90 (d, *J* = 14.3 Hz, 1H), 4.73 (d, *J* = 14.3 Hz, 1H), 3.38 (d, *J* = 12.7 Hz, 1H), 3.09 (d, *J* = 12.7 Hz, 1H), 2.83 (d, *J* = 13.2 Hz, 1H), 2.55 (d, *J* = 13.2 Hz, 1H), 1.16 (s, 3H); **<sup>13</sup>C NMR** (101 MHz, CDCl<sub>3</sub>) δ 162.3, 148.1, 147.7, 138.1, 136.9, 130.5, 128.8, 128.6, 127.7, 127.6, 126.3, 117.8, 112.0, 110.4, 102.2, 56.1, 50.3, 45.8, 38.2, 22.3. **HRMS** (EI): *m/z*: [M]<sup>+</sup> Calcd for C<sub>25</sub>H<sub>23</sub>NO<sub>3</sub>: 385.1678, found 385.1678. HPLC (AD-H, 2-propanol /n-hexane = 20/80, flow rate = 1.0 mL/min, λ = 254 nm) t<sub>R</sub> = 18.2 min (major), 27.9 min (minor). [α]<sub>D</sub><sup>20</sup> = -163.9 (*c* = 0.5, CHCl<sub>3</sub>).

<Chromatogram>  
mAU

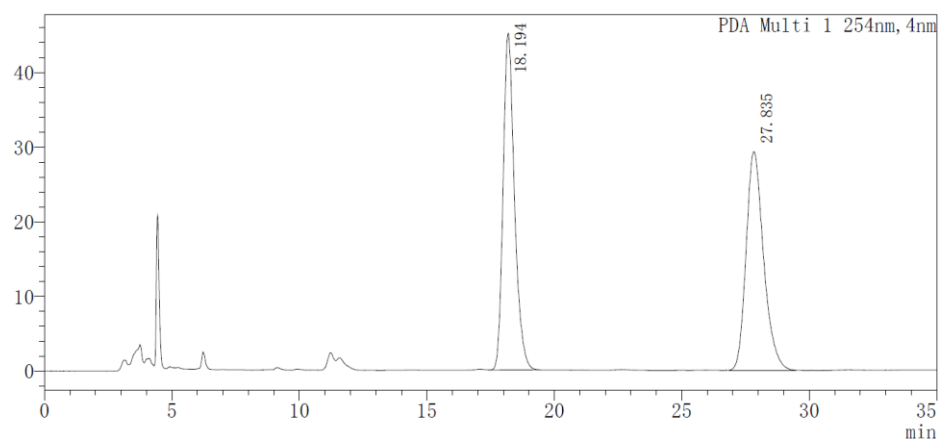

<Peak Table>

PDA Ch1 254nm

| No.   | Ret. Time (min) | Height (mAU) | Height% | Area (mAU*min) | Area%   |
|-------|-----------------|--------------|---------|----------------|---------|
| 1     | 18.194          | 45112        | 60.617  | 1400924        | 50.092  |
| 2     | 27.835          | 29309        | 39.383  | 1395754        | 49.908  |
| Total |                 | 74421        | 100.000 | 2796678        | 100.000 |

<Chromatogram>  
mAU

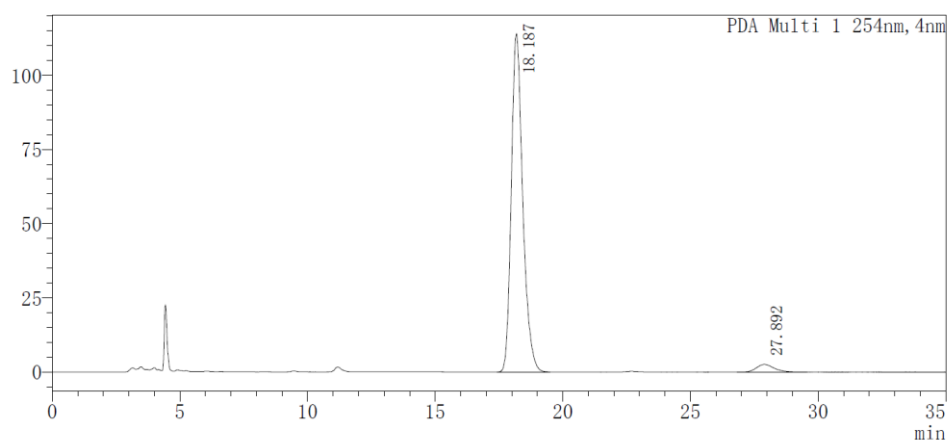

<Peak Table>

PDA Ch1 254nm

| No.   | Ret. Time (min) | Height (mAU) | Height% | Area (mAU*min) | Area%   |
|-------|-----------------|--------------|---------|----------------|---------|
| 1     | 18.187          | 114024       | 97.761  | 3555290        | 96.603  |
| 2     | 27.892          | 2612         | 2.239   | 125017         | 3.397   |
| Total |                 | 116635       | 100.000 | 3680307        | 100.000 |



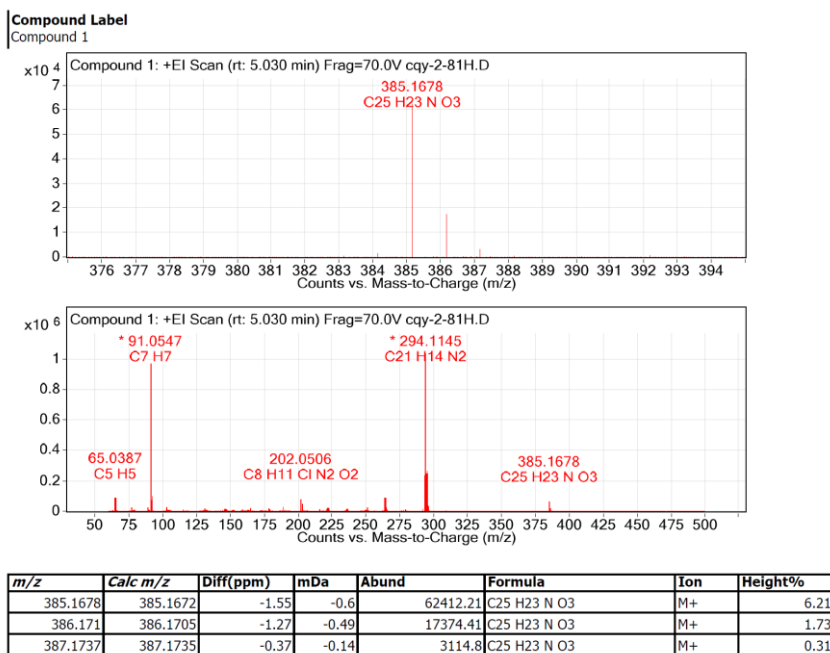

**(R)-2,4-dibenzyl-6-chloro-4-methyl-3,4-dihydroisoquinolin-1(2H)-one (7f)**

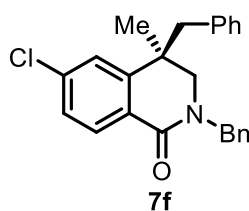

Prepared according to typical procedure from **2a** (61.2 mg, 0.3 mmol), *N*-allyl carboxamide **6f** (85.2 mg, 0.2 mmol), after a flash column chromatography (hexanes: EA = 20:1-10:1) afforded the product **7f** as a yellow oil (42.9 mg, 57% yield) with 92% *ee*. **<sup>1</sup>H NMR** (400 MHz, CDCl<sub>3</sub>) δ 8.24 (d, *J* = 2.3 Hz, 1H), 7.40-7.28 (m, 6H), 7.23-7.17 (m, 3H), 6.83 (d, *J* = 8.3 Hz, 1H), 6.73-6.70 (m, 2H), 4.93 (d, *J* = 14.4 Hz, 1H), 4.73 (d, *J* = 14.4 Hz, 1H), 3.39 (d, *J* = 12.7 Hz, 1H), 3.14 (d, *J* = 12.7 Hz, 1H), 2.85 (d, *J* = 13.2 Hz, 1H), 2.61 (d, *J* = 13.2 Hz, 1H), 1.22 (s, 3H); **<sup>13</sup>C NMR** (101 MHz, CDCl<sub>3</sub>) δ 163.2, 143.1, 136.6, 136.4, 133.2, 131.4, 130.5, 129.7, 128.7 (two peaks overlap), 128.7, 127.8, 127.7, 126.6, 126.6, 55.6, 50.9, 45.7, 37.8, 22.0. **HRMS** (EI): *m/z*: [M]<sup>+</sup> Calcd for C<sub>24</sub>H<sub>22</sub>ClNO: 375.1390, found 375.1384. HPLC (AD-H, 2-propanol /n-hexane = 10/90, flow rate = 1.0 mL/min, λ = 254 nm) t<sub>R</sub> = 18.2 min (major), 26.1 min (minor). [α]<sub>D</sub><sup>20</sup> = -175.4 (*c* = 0.5, CHCl<sub>3</sub>).

<Chromatogram>

mAU

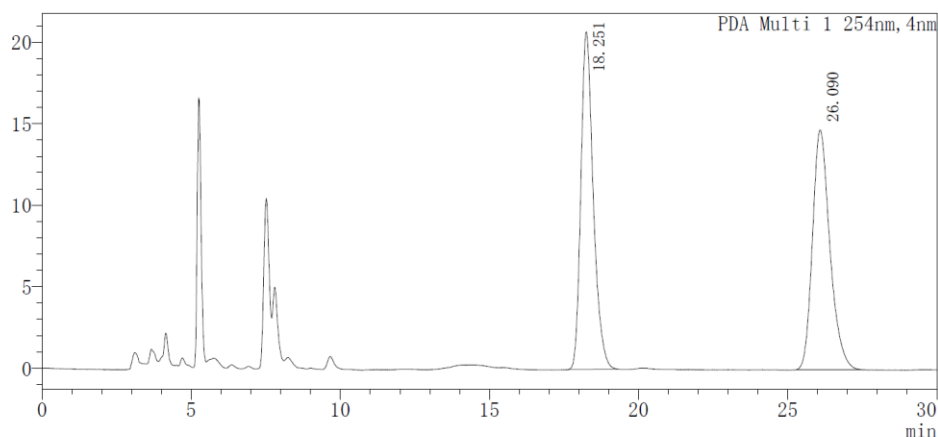

<Peak Table>

PDA Ch1 254nm

| No.   | Ret. Time (min) | Height (mAU) | Height% | Area (mAU*min) | Area%   |
|-------|-----------------|--------------|---------|----------------|---------|
| 1     | 18.251          | 20686        | 58.458  | 597740         | 50.051  |
| 2     | 26.090          | 14700        | 41.542  | 596513         | 49.949  |
| Total |                 | 35386        | 100.000 | 1194253        | 100.000 |

<Chromatogram>

mAU

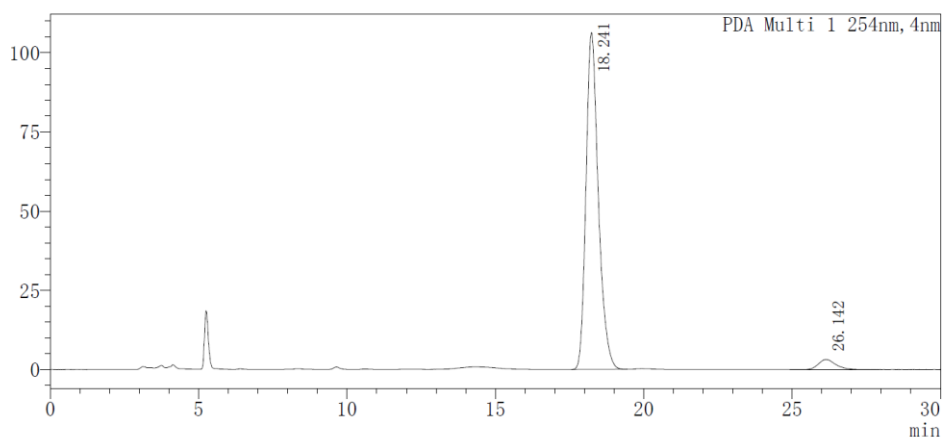

<Peak Table>

PDA Ch1 254nm

| No.   | Ret. Time (min) | Height (mAU) | Height% | Area (mAU*min) | Area%   |
|-------|-----------------|--------------|---------|----------------|---------|
| 1     | 18.241          | 106253       | 97.091  | 3081447        | 95.971  |
| 2     | 26.142          | 3183         | 2.909   | 129367         | 4.029   |
| Total |                 | 109436       | 100.000 | 3210814        | 100.000 |

**(R)-2,4-dibenzyl-7-chloro-4-methyl-3,4-dihydroisoquinolin-1(2H)-one (7g)**

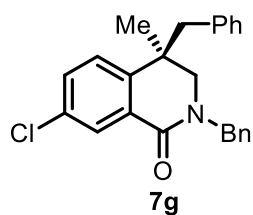

Prepared according to typical procedure from **2a** (61.2 mg, 0.2 mmol), *N*-allyl

carboxamide **6g** (85.2 mg, 0.2 mmol), after a flash column chromatography (hexanes: EA = 20:1-10:1) afforded the product **7g** as a yellow oil (62.0 mg, 82% yield) with 97% *ee*. **<sup>1</sup>H NMR** (400 MHz, CDCl<sub>3</sub>) δ 8.21 (d, *J* = 8.3 Hz, 1H), 7.40-7.31 (m, 6H), 7.24-7.19 (m, 3H), 6.92 (d, *J* = 2.0 Hz, 1H), 6.73-6.71 (m, 2H), 4.93 (d, *J* = 14.4 Hz, 1H), 4.73 (d, *J* = 14.4 Hz, 1H), 3.38 (d, *J* = 12.8 Hz, 1H), 3.14 (d, *J* = 12.8 Hz, 1H), 2.84 (d, *J* = 13.2 Hz, 1H), 2.65 (d, *J* = 13.3 Hz, 1H), 1.21 (s, 3H); **<sup>13</sup>C NMR** (101 MHz, CDCl<sub>3</sub>) δ 163.6, 146.8, 137.9, 136.7, 136.3, 130.4, 130.4, 128.7, 128.6, 127.8, 127.7, 127.2, 126.7, 126.5, 125., 55.22, 50.8, 45.6, 38.1, 21.9. **HRMS** (EI): *m/z*: [M]<sup>+</sup> Calcd for C<sub>24</sub>H<sub>22</sub>ClNO: 375.1390, found 375.1389. HPLC (AD-H, 2-propanol/n-hexane = 15/85, flow rate = 1.0 mL/min, λ = 254 nm) t<sub>R</sub> = 13.5 min (major), 34.1 min (minor). [α]<sub>D</sub><sup>20</sup> = -139.3 (*c* = 0.5, CHCl<sub>3</sub>).

<Chromatogram>  
mAU

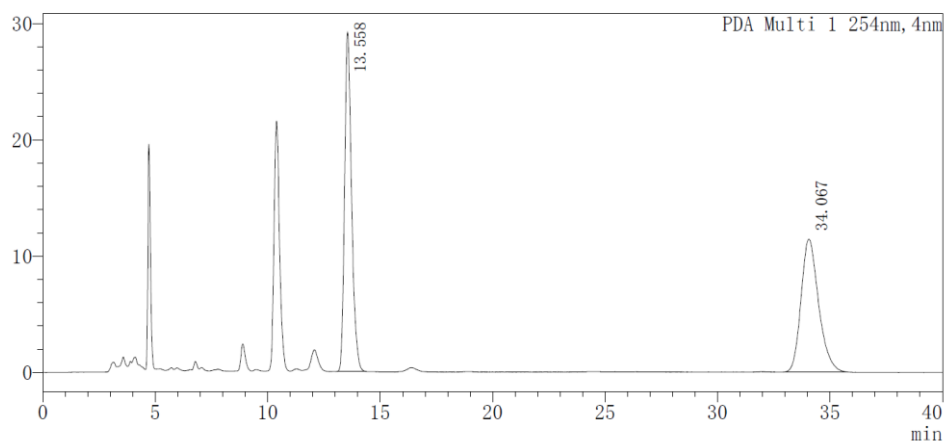

<Peak Table>  
PDA Ch1 254nm

| No.   | Ret. Time(min) | Height (mAU) | Height% | Area (mAU*min) | Area%   |
|-------|----------------|--------------|---------|----------------|---------|
| 1     | 13.558         | 29165        | 71.876  | 629635         | 50.464  |
| 2     | 34.067         | 11412        | 28.124  | 618056         | 49.536  |
| Total |                | 40577        | 100.000 | 1247690        | 100.000 |

<Chromatogram>

mAU

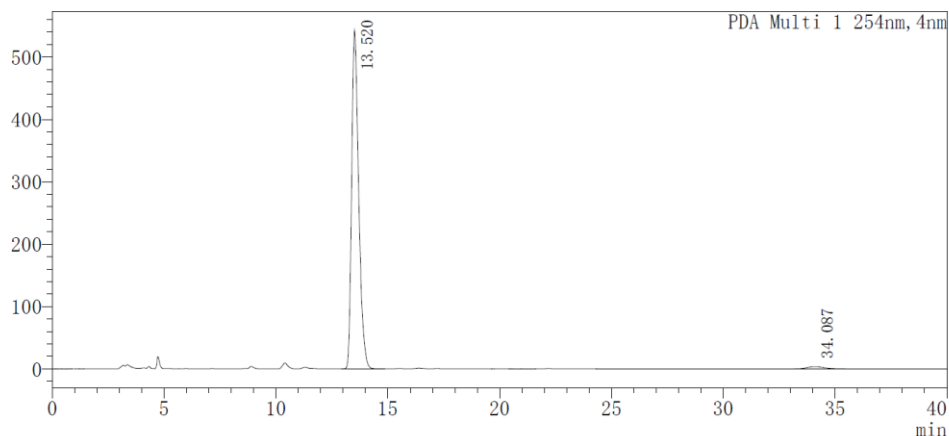

<Peak Table>

PDA Ch1 254nm

| No.   | Ret. Time(min) | Height (mAU) | Height% | Area (mAU*min) | Area%   |
|-------|----------------|--------------|---------|----------------|---------|
| 1     | 13.520         | 542971       | 99.350  | 11918901       | 98.443  |
| 2     | 34.087         | 3551         | 0.650   | 188547         | 1.557   |
| Total |                | 546521       | 100.000 | 12107449       | 100.000 |

Compound Label

Compound 1

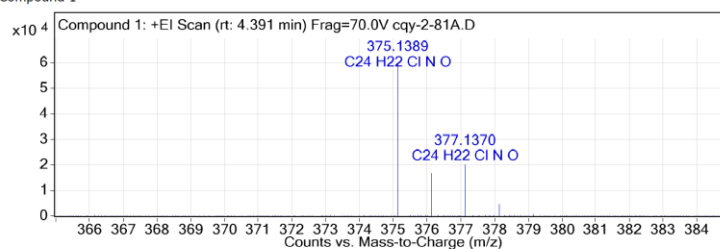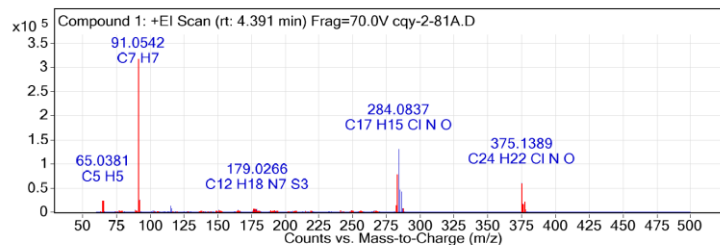

| m/z      | Calc m/z | Diff(ppm) | mDa   | Abund    | Formula                                            | Ion | Height% |
|----------|----------|-----------|-------|----------|----------------------------------------------------|-----|---------|
| 375.1389 | 375.1384 | -1.21     | -0.45 | 59837.69 | C <sub>24</sub> H <sub>22</sub> ClN <sub>2</sub> O | M+  | 18.93   |
| 377.137  | 377.1364 | -1.5      | -0.56 | 20154.1  | C <sub>24</sub> H <sub>22</sub> ClN <sub>2</sub> O | M+  | 6.38    |

**(R)-2,4-dibenzyl-6-fluoro-4-methyl-3,4-dihydroisoquinolin-1(2H)-one (7h)**

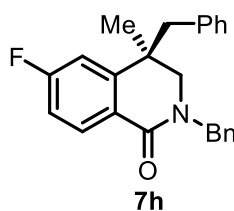

Prepared according to typical procedure from **2a** (61.2 mg, 0.3 mmol), *N*-allyl carboxamide **6h** (81.8 mg, 0.2 mmol), after a flash column chromatography (hexanes:

EA = 20:1-10:1) afforded the product **7h** as a yellow oil (56.7 mg, 79% yield) with 93% *ee*. **<sup>1</sup>H NMR** (400 MHz, CDCl<sub>3</sub>) δ 7.95 (dd, *J* = 9.3, 2.9 Hz, 1H), 7.41-7.31 (m, 5H), 7.22-7.16 (m, 3H), 7.06 (td, *J* = 8.4, 2.9 Hz, 1H), 6.87-6.83 (m, 1H), 6.71-6.68 (m, 2H), 4.92 (d, *J* = 14.4 Hz, 1H), 4.76 (d, *J* = 14.4 Hz, 1H), 3.41 (d, *J* = 12.7 Hz, 1H), 3.15 (d, *J* = 12.7 Hz, 1H), 2.85 (d, *J* = 13.2 Hz, 1H), 2.59 (d, *J* = 13.2 Hz, 1H), 1.23 (s, 3H); **<sup>13</sup>C NMR** (101 MHz, CDCl<sub>3</sub>) δ 163.4 (d, *J* = 2.3 Hz), 161.7 (d, *J* = 246.2 Hz), 136.6 (d, *J* = 6.7 Hz), 130.5, 129.5, 128.8, 128.7 (d, *J* = 2.8 Hz), 128.4, 127.8, 127.7, 127.3, 127.0 (d, *J* = 7.4 Hz), 126.5, 118.4 (d, *J* = 21.7 Hz), 115.3 (d, *J* = 23.2 Hz), 55.8, 50.9, 45.8, 37.7, 22.2; **<sup>19</sup>F NMR** (376 MHz, CDCl<sub>3</sub>) δ -114.78. **HRMS** (EI): *m/z*: [M]<sup>+</sup> Calcd for C<sub>24</sub>H<sub>22</sub>FNO: 359.1685, found 359.1683. **HPLC** (AD-H, 2-propanol /n-hexane = 10/90, flow rate = 1.0 mL/min, λ = 254 nm) t<sub>R</sub> = 15.4 min (major), 20.0 min (minor). [α]<sub>D</sub><sup>20</sup> = -138.6 (*c* = 0.5, CHCl<sub>3</sub>).

<Chromatogram>  
mAU

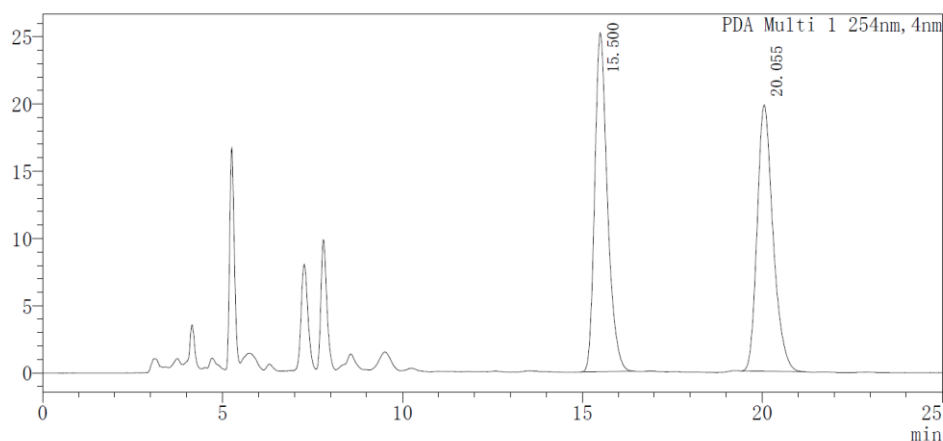

<Peak Table>

PDA Ch1 254nm

| No.   | Ret. Time (min) | Height (mAU) | Height% | Area (mAU*min) | Area%   |
|-------|-----------------|--------------|---------|----------------|---------|
| 1     | 15.500          | 25189        | 55.987  | 618263         | 50.390  |
| 2     | 20.055          | 19802        | 44.013  | 608695         | 49.610  |
| Total |                 | 44990        | 100.000 | 1226958        | 100.000 |

<Chromatogram>

mAU

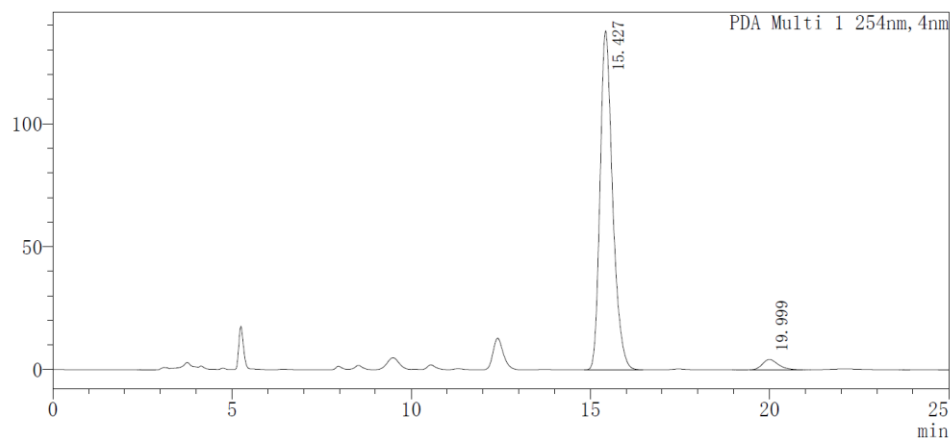

<Peak Table>

PDA Ch1 254nm

| No.   | Ret. Time (min) | Height (mAU) | Height% | Area (mAU*min) | Area%   |
|-------|-----------------|--------------|---------|----------------|---------|
| 1     | 15.427          | 137833       | 97.034  | 3364459        | 96.318  |
| 2     | 19.999          | 4213         | 2.966   | 128630         | 3.682   |
| Total |                 | 142046       | 100.000 | 3493089        | 100.000 |

Compound Label

Compound 1

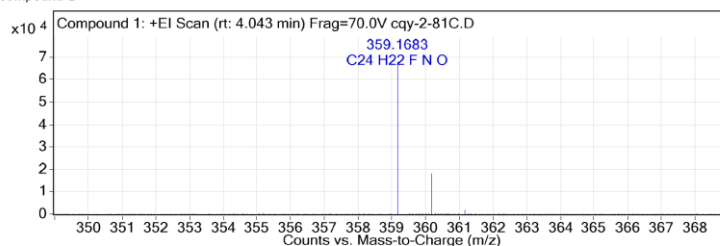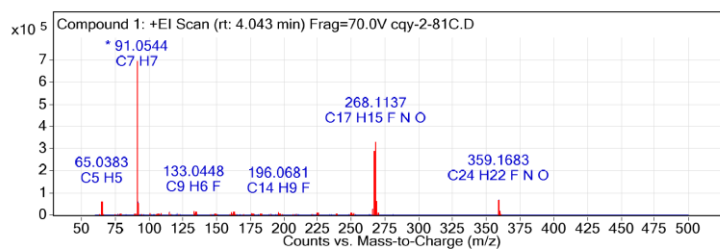

| m/z      | Calc m/z | Diff(ppm) | mDa   | Abund    | Formula                               | Ion | Height% |
|----------|----------|-----------|-------|----------|---------------------------------------|-----|---------|
| 359.1683 | 359.168  | -0.85     | -0.31 | 67953.95 | C <sub>24</sub> H <sub>22</sub> F N O | M+  | 9.87    |
| 360.1717 | 360.1713 | -1.19     | -0.43 | 17996.09 | C <sub>24</sub> H <sub>22</sub> F N O | M+  | 2.61    |
| 361.172  | 361.1745 | 6.75      | 2.44  | 1901.24  | C <sub>24</sub> H <sub>22</sub> F N O | M+  | 0.28    |

## (S)-2,4-dibenzyl-4-(naphthalen-1-ylmethyl)-3,4-dihydroisoquinolin-1(2H)-one (7i)

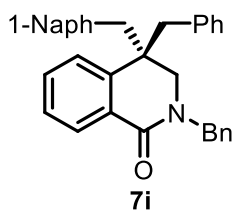

Prepared according to typical procedure from **2a** (61.2 mg, 0.3 mmol), *N*-allyl carboxamide **6i** (103.5 mg, 0.2 mmol), after a flash column chromatography (hexanes:

EA = 20:1-10:1) afforded the product **7i** as a yellow oil (50.4 mg, 56% yield) with 88% *ee*. **<sup>1</sup>H NMR** (400 MHz, CDCl<sub>3</sub>) δ 8.27 (dd, *J* = 7.8, 1.6 Hz, 1H), 7.82 (dd, *J* = 8.2, 1.4 Hz, 1H), 7.71 (d, *J* = 8.2 Hz, 1H), 7.62 (d, *J* = 8.6 Hz, 1H), 7.44-7.24 (m, 10H), 7.22-7.17 (m, 3H), 7.02 (dd, *J* = 7.8, 1.2 Hz, 1H), 6.96 (dd, *J* = 7.0, 1.2 Hz, 1H), 6.93-6.90 (m, 2H), 4.61-4.45 (m, 2H), 3.68 (d, *J* = 14.6 Hz, 1H), 3.46-3.31 (m, 2H), 3.28-3.20 (m, 2H), 3.04 (d, *J* = 14.0 Hz, 1H); **<sup>13</sup>C NMR** (101 MHz, CDCl<sub>3</sub>) δ 163.7, 142.3, 136.7, 136.7, 133.6, 133.0, 132.8, 131.2, 130.6, 129.0, 128.7, 128.7, 128.6, 128.6, 128.3, 128.0, 127.5, 127.3, 127.0, 126.6, 126.2, 125.7, 125.2, 124.8, 123.5, 53.3, 50.6, 43.7, 42.6, 39.0. **HRMS** (EI): *m/z*: [M]<sup>+</sup> Calcd for C<sub>34</sub>H<sub>29</sub>NO: 467.2249, found 467.2246. **HPLC** (AD-H, 2-propanol /n-hexane = 10/90, flow rate = 1.0 mL/min, λ = 254 nm) t<sub>R</sub> = 37.8 min (major), 47.4 min (minor). [α]<sub>D</sub><sup>20</sup> = -1.5 (*c* = 0.5, CHCl<sub>3</sub>).

<Chromatogram>  
mAU

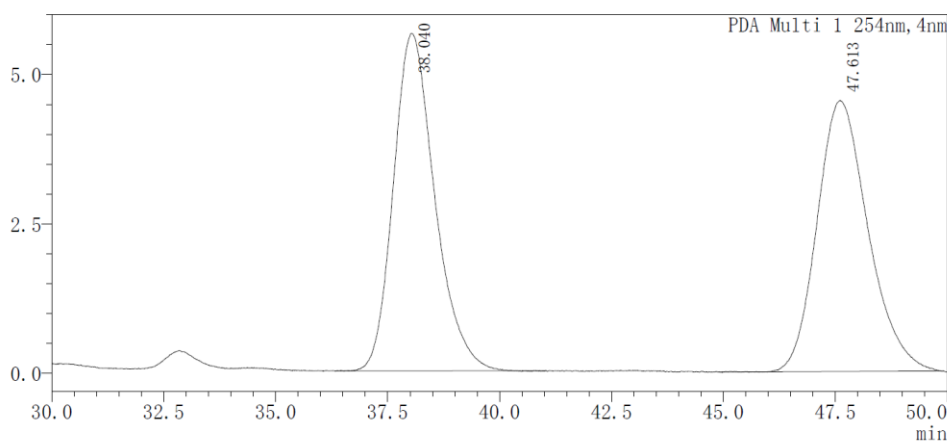

<Peak Table>

PDA Ch1 254nm

| No.   | Ret. Time (min) | Height (mAU) | Height% | Area (mAU*min) | Area%   |
|-------|-----------------|--------------|---------|----------------|---------|
| 1     | 38.040          | 5650         | 55.493  | 364186         | 50.337  |
| 2     | 47.613          | 4531         | 44.507  | 359306         | 49.663  |
| Total |                 | 10181        | 100.000 | 723492         | 100.000 |

<Chromatogram>

mAU

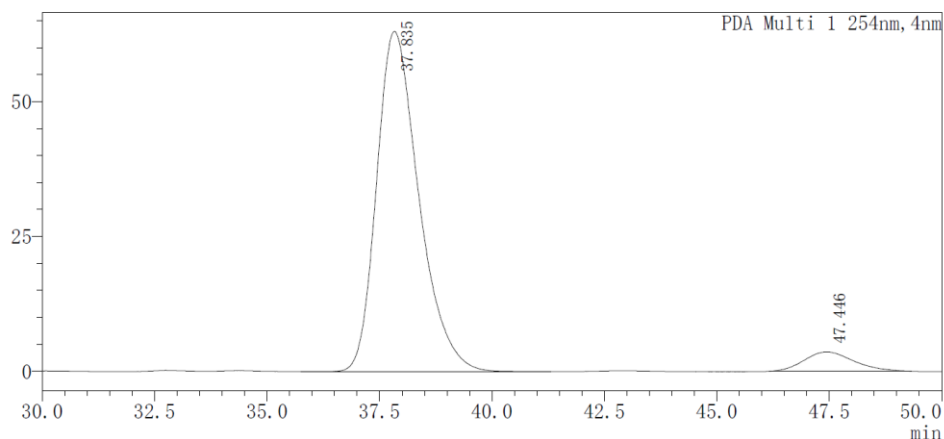

<Peak Table>

PDA Ch1 254nm

| No.   | Ret. Time (min) | Height (mAU) | Height% | Area (mAU*min) | Area%   |
|-------|-----------------|--------------|---------|----------------|---------|
| 1     | 37.835          | 63084        | 94.638  | 4114990        | 93.765  |
| 2     | 47.446          | 3574         | 5.362   | 273608         | 6.235   |
| Total |                 | 66658        | 100.000 | 4388599        | 100.000 |

**(*R*)-4-(3-([1,1'-biphenyl]-4-yl)prop-2-yn-1-yl)-2-(4-methoxybenzyl)-4-methyl-3,4-dihydroisoquinolin-1(2H)-one (**7j**)**

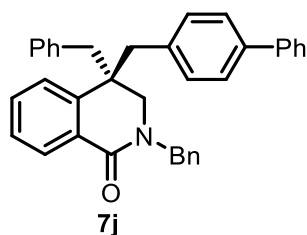

Prepared according to typical procedure from **2h** (84.1 mg, 0.3 mmol), *N*-allyl carboxamide **6j** (99.4 mg, 0.2 mmol), after a flash column chromatography (hexanes: EA = 20:1-10:1) afforded the product **7j** as a yellow oil (67.2 mg, 70% yield) with 84% *ee*. <sup>1</sup>H NMR (400 MHz, CDCl<sub>3</sub>) δ 8.32-8.30 (m, 1H), 7.60-7.56 (m, 2H), 7.48-7.40 (m, 6H), 7.39-7.31 (m, 6H), 7.23-7.19 (m, 3H), 7.07-7.04 (m, 1H), 6.95-6.93 (m, 2H), 6.91-6.88 (m, 2H), 4.80-4.70 (m, 2H), 3.42-3.35 (m, 2H), 3.03 (d, *J* = 2.9 Hz, 4H); <sup>13</sup>C NMR (101 MHz, CDCl<sub>3</sub>) δ 163.9, 142.3, 140.5, 139.3, 136.8, 136.6, 135.6, 131.1, 130.6, 129.0, 128.8, 128.7, 128.7 (two peaks overlap), 128.6, 127.9, 127.6, 127.2, 127.2, 127.1, 126.9, 126.5, 126.3, 53.8, 50.9, 42.8, 42.3, 42.0. HRMS (EI): *m/z*: [M]<sup>+</sup> Calcd for C<sub>36</sub>H<sub>31</sub>NO: 493.2406, found 493.2402. HPLC (IA, 2-propanol /n-hexane = 10/90, flow rate = 1.0 mL/min, λ = 254 nm) t<sub>R</sub> = 36.7 min (major), 51.7 min (minor). [α]<sub>D</sub><sup>20</sup> = -35.9 (*c* = 0.5, CHCl<sub>3</sub>).



<Chromatogram>

mAU

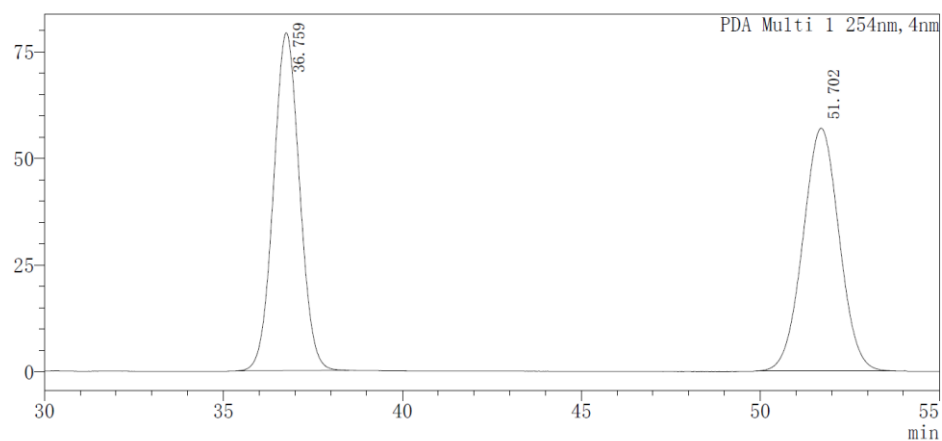

<Peak Table>

PDA Ch1 254nm

| No.   | Ret. Time (min) | Height (mAU) | Height% | Area (mAU*min) | Area%   |
|-------|-----------------|--------------|---------|----------------|---------|
| 1     | 36.759          | 79164        | 58.178  | 4022761        | 50.021  |
| 2     | 51.702          | 56909        | 41.822  | 4019424        | 49.979  |
| Total |                 | 136073       | 100.000 | 8042184        | 100.000 |

<Chromatogram>

mAU

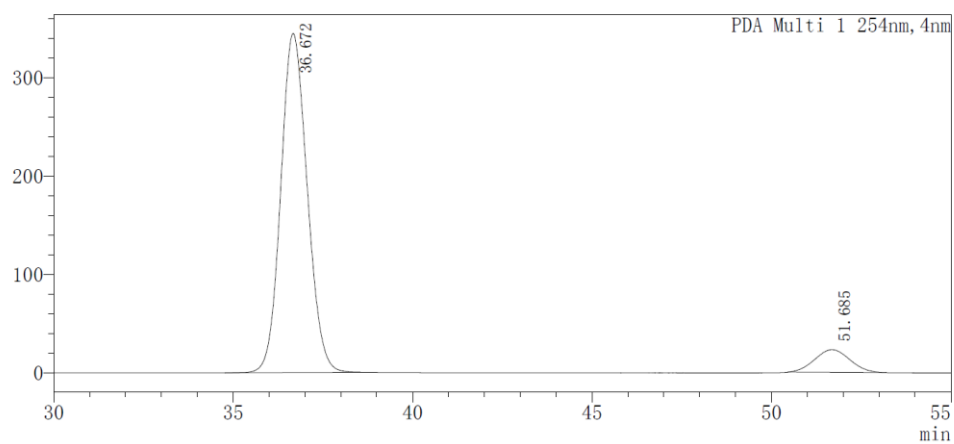

<Peak Table>

PDA Ch1 254nm

| No.   | Ret. Time (min) | Height (mAU) | Height% | Area (mAU*min) | Area%   |
|-------|-----------------|--------------|---------|----------------|---------|
| 1     | 36.672          | 344903       | 93.746  | 17656574       | 91.868  |
| 2     | 51.685          | 23010        | 6.254   | 1562845        | 8.132   |
| Total |                 | 367912       | 100.000 | 19219420       | 100.000 |

#### 4. Gram-scale synthesis of **3a**

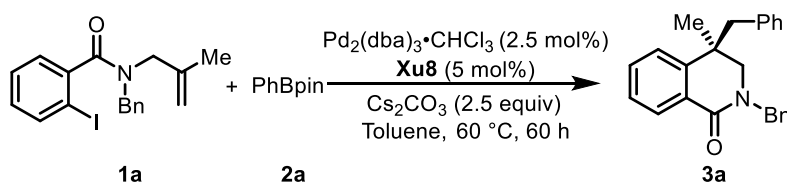

To a sealed tube was added **Xu8** (160 mg, 0.25 mmol),  $\text{Pd}_2(\text{dba})_3 \cdot \text{CHCl}_3$  (130 mg, 0.125 mmol). The flask was evacuated and refilled with argon. Toluene (1.0 mL/0.1 mmol) was added to the tube, and stirred at room temperature for 1 h. Then under argon atmosphere  $\text{Cs}_2\text{CO}_3$  (4.1 g, 12.5 mmol), **2a** (1.53g, 7.5 mmol), *N*-allyl carboxamide **1a** (1.95 g, 5 mmol) were successively added. The reaction mixture was kept stirring at 60 °C for 60 h. After completion of the reaction (monitored by TLC), the mixture was concentrated in vacuum and the residue was purified by flash column chromatography on silica gel with petroleum ether-ethyl acetate as eluent to give the desired product **3a** (1.52 g, 89% yield, 92% *ee*).

#### Gram-scale synthesis of **5a**:

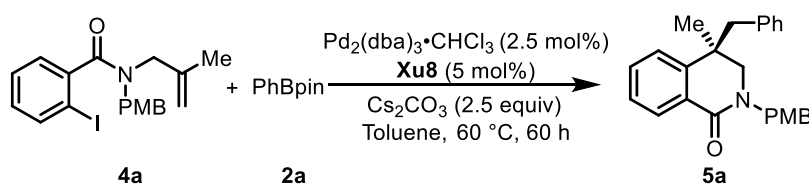

To a sealed tube was added **Xu8** (160 mg, 0.25 mmol),  $\text{Pd}_2(\text{dba})_3 \cdot \text{CHCl}_3$  (130 mg, 0.125 mmol). The flask was evacuated and refilled with argon. Toluene (1.0 mL/0.1 mmol) was added to the tube, and stirred at room temperature for 1 h. Then under argon atmosphere  $\text{Cs}_2\text{CO}_3$  (4.1 g, 12.5 mmol), **2a** (1.53g, 7.5 mmol), *N*-allyl carboxamide **4a** (2.10 g, 5 mmol) were successively added. The reaction mixture was kept stirring at 60 °C for 60 h. After completion of the reaction (monitored by TLC), the mixture was concentrated in vacuum and the residue was purified by flash column chromatography on silica gel with petroleum ether-ethyl acetate as eluent to give the desired product **5a** (1.41 g, 76% yield, 94% *ee*).

#### General experimental procedure for synthesis of **8**:<sup>4</sup>

A round bottom flask equipped with a magnetic stir bar and charged with a solution of **5a** (186 mg, 0.5 mmol) in TFA (1.6 mL) and Anisole (0.27 mL) stir at 80 °C for 20 h.

After the indicated time the reaction mixture was quenched with saturated sodium bicarbonate solution and extracted with EA. The combined organic phases were dried over Na<sub>2</sub>SO<sub>4</sub> and concentrated in vacuo, and the reaction mixture was purified directly by chromatography on silica gel to afford the title product **8** (101 mg, 80 % yield, 94% *ee*).

**(*R*)-4-benzyl-4-methyl-3,4-dihydroisoquinolin-1(2H)-one (8)**

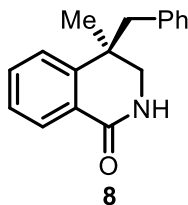

Flash column chromatography on a silica gel (ethyl acetate: petroleum ether) give the product **8** as a yellow oil (100.9 mg, 80% yield) with 94% *ee*. **<sup>1</sup>H NMR** (400 MHz, CDCl<sub>3</sub>) δ 8.18 (dd, *J* = 7.5, 1.7 Hz, 1H), 7.57 (d, *J* = 4.6 Hz, 1H), 7.48-7.38 (m, 2H), 7.26-7.19 (m, 3H), 7.09 (dd, *J* = 7.6, 1.4 Hz, 1H), 7.00-6.94 (m, 2H), 3.40-3.27 (m, 2H), 2.97-2.89 (m, 2H), 1.31 (s, 3H); **<sup>13</sup>C NMR** (101 MHz, CDCl<sub>3</sub>) δ 166.6, 146.2, 136.8, 132.1, 130.4, 128.1, 127.8, 127.7, 126.8, 126.4, 124.8, 49.4, 45.3, 37.9, 21.9. **HRMS** (EI): *m/z*: [M]<sup>+</sup> Calcd for C<sub>17</sub>H<sub>17</sub>NO: 251.1310, found 251.1307. HPLC (AD-H, 2-propanol /n-hexane = 20/80, flow rate = 1.0 mL/min, λ = 254 nm) tR = 7.2 min (major), 14.6 min (minor). [α]<sub>D</sub><sup>20</sup> = -175.3 (*c* = 0.5, CHCl<sub>3</sub>).

<Chromatogram>

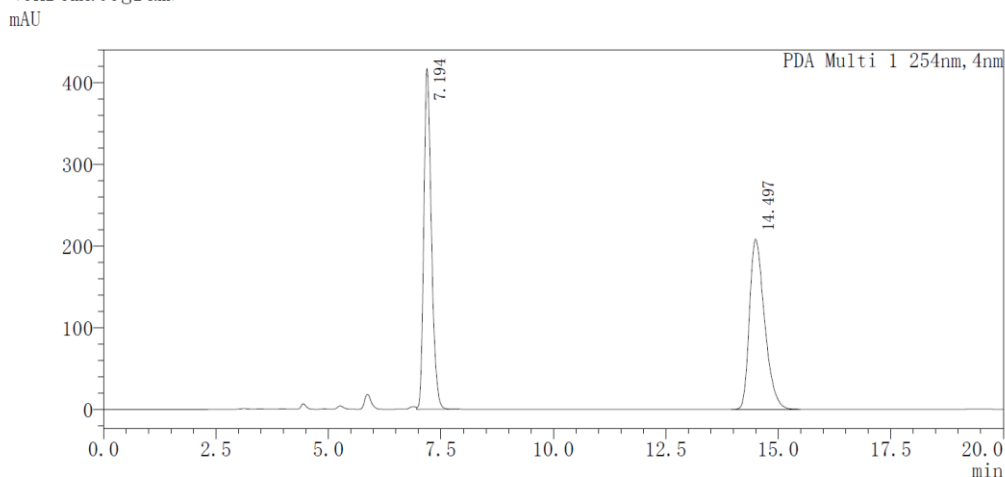

<Peak Table>

PDA Ch1 254nm

| No.   | Ret. Time (min) | Height (mAU) | Height% | Area (mAU*min) | Area%   |
|-------|-----------------|--------------|---------|----------------|---------|
| 1     | 7.194           | 416836       | 66.686  | 4877860        | 50.083  |
| 2     | 14.497          | 208236       | 33.314  | 4861672        | 49.917  |
| Total |                 | 625072       | 100.000 | 9739532        | 100.000 |

<Chromatogram>

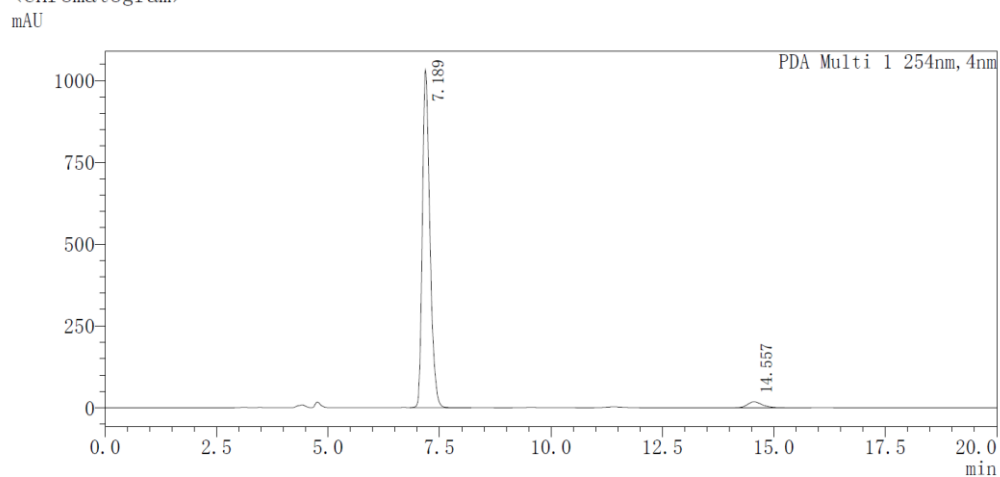

<Peak Table>

PDA Ch1 254nm

| No.   | Ret. Time (min) | Height (mAU) | Height% | Area (mAU*min) | Area%   |
|-------|-----------------|--------------|---------|----------------|---------|
| 1     | 7.189           | 1032706      | 98.295  | 12173774       | 96.761  |
| 2     | 14.557          | 17910        | 1.705   | 407512         | 3.239   |
| Total |                 | 1050616      | 100.000 | 12581285       | 100.000 |

### General experimental procedure for synthesis of **9**:<sup>5</sup>

To a stirred solution of **5a** (74.3 mg, 0.2 mmol) in Et<sub>2</sub>O (15 mL) at 0 °C was added LiAlH<sub>4</sub> (11.4 mg, 0.3 mmol). After 3 h, the reaction mixture was quenched with brine and extracted with Et<sub>2</sub>O. The combined organic phases were dried over Na<sub>2</sub>SO<sub>4</sub> and concentrated in vacuo, and the reaction mixture was purified directly by

chromatography on silica gel to afford the title product **9** (64.4 mg, 90 % yield, 93% *ee*).

**(*R*)-4-benzyl-2-(4-methoxybenzyl)-4-methyl-1,2,3,4-tetrahydroisoquinoline (**9**)**

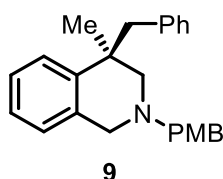

Flash column chromatography on a silica gel (ethyl acetate: petroleum ether) give the product **9** as a yellow oil (64.4 mg, 90 % yield) with 93% *ee*. **<sup>1</sup>H NMR** (400 MHz, CDCl<sub>3</sub>) δ 7.44-7.40 (m, 2H), 7.28-7.15 (m, 6H), 7.08-6.95 (m, 5H), 3.91-3.87 (m, 4H), 3.68-3.60 (m, 2H), 3.47 (d, *J* = 14.7 Hz, 1H), 3.21 (d, *J* = 13.0 Hz, 1H), 2.89 (d, *J* = 13.0 Hz, 1H), 2.81 (dd, *J* = 11.6, 1.6 Hz, 1H), 2.15 (d, *J* = 11.5 Hz, 1H), 1.21 (s, 3H); **<sup>13</sup>C NMR** (101 MHz, CDCl<sub>3</sub>) δ 158.8, 143.3, 138.8, 134.4, 130.9, 130.6, 130.4, 127.6, 126.5, 126.3, 126.1, 125.8, 125.6, 113.7, 62.3, 60.6, 57.3, 55.3, 47.8, 39.3, 24.8. **HRMS** (ESI): *m/z*: [M+H]<sup>+</sup> Calcd for C<sub>25</sub>H<sub>27</sub>NO: 358.2171, found 358.2165. HPLC (AD-H, 2-propanol /n-hexane = 5/95, flow rate = 1.0 mL/min, λ = 254 nm) t<sub>R</sub> = 4.6 min (major), 12.7 min (minor). [α]<sub>D</sub><sup>20</sup> = -31.9 (*c* = 0.5, CHCl<sub>3</sub>).

<Chromatogram>  
mAU

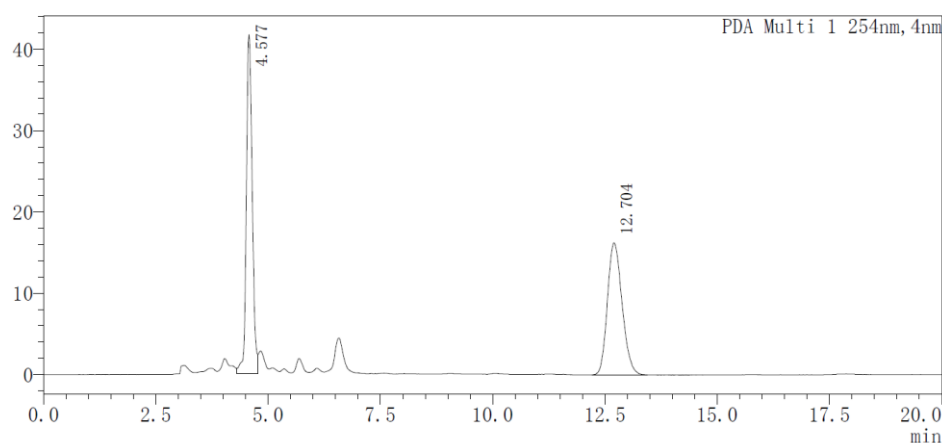

<Peak Table>

PDA Ch1 254nm

| No.   | Ret. Time (min) | Height (mAU) | Height% | Area (mAU*min) | Area%   |
|-------|-----------------|--------------|---------|----------------|---------|
| 1     | 4.577           | 41712        | 71.983  | 381555         | 50.874  |
| 2     | 12.704          | 16235        | 28.017  | 368447         | 49.126  |
| Total |                 | 57947        | 100.000 | 750002         | 100.000 |

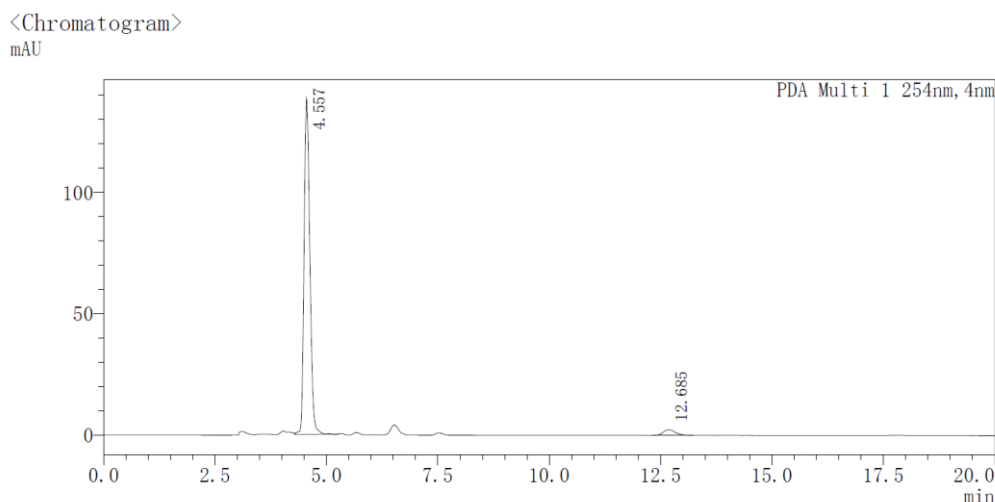

<Peak Table>

PDA Ch1 254nm

| No.   | Ret. Time (min) | Height (mAU) | Height% | Area (mAU*min) | Area%   |
|-------|-----------------|--------------|---------|----------------|---------|
| 1     | 4.557           | 138722       | 98.288  | 1252484        | 96.456  |
| 2     | 12.685          | 2416         | 1.712   | 46019          | 3.544   |
| Total |                 | 141138       | 100.000 | 1298504        | 100.000 |

### General experimental procedure for synthesis of **10**:<sup>5</sup>

To a stirred solution of **3a** (136 mg, 0.4 mmol) in Et<sub>2</sub>O (15 mL) at 0 °C was added LiAlH<sub>4</sub> (22.8 mg, 0.6 mmol). After stirred for 3 h at the same temperature, the reaction mixture was quenched with brine and extracted with Et<sub>2</sub>O. The combined organic phases were dried over Na<sub>2</sub>SO<sub>4</sub> and concentrated in vacuo, and the reaction mixture was purified by chromatography on silica gel to afford the title product **10** (116 mg, 89 % yield, 90% *ee*).

### (*R*)-2,4-dibenzyl-4-methyl-1,2,3,4-tetrahydroisoquinoline (**10**)

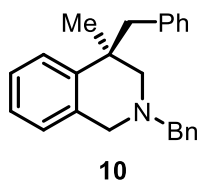

Flash column chromatography on a silica gel (ethyl acetate: petroleum ether) give the product **10** as a yellow oil (116.4 mg, 89% yield) with 90% *ee*. **<sup>1</sup>H NMR** (400 MHz, CDCl<sub>3</sub>) δ 7.59-7.56 (m, 2H), 7.51-7.42 (m, 3H), 7.35-7.20 (m, 6H), 7.11-7.07 (m, 3H), 3.96 (dd, *J* = 15.0, 4.1 Hz, 1H), 3.82-3.70 (m, 2H), 3.55 (dd, *J* = 14.9, 3.9 Hz, 1H), 3.32-3.27 (m, 1H), 3.01-2.85 (m, 2H), 2.28-2.23 (m, 1H), 1.32-1.28 (m, 3H); **<sup>13</sup>C NMR** (101 MHz, CDCl<sub>3</sub>) δ 143.2, 138.8, 138.6, 134.3, 130.9, 129.2, 128.3, 127.6, 127.1, 126.5, 126.3, 126.1, 125.8, 125.6, 63.0, 60.9, 57.3, 47.8, 39.3, 24.8. **HRMS** (ESI): *m/z*:

$[M+H]^+$  Calcd for  $C_{24}H_{25}N$ : 328.2065, found 328.2060. HPLC (AD-H, 2-propanol /n-hexane = 5/95, flow rate = 1.0 mL/min,  $\lambda$  = 254 nm) tR = 3.8 min (major), 6.9 min (minor).  $[\alpha]_D^{20}$  = -48.9 ( $c$  = 0.5,  $CHCl_3$ ).

<Chromatogram>

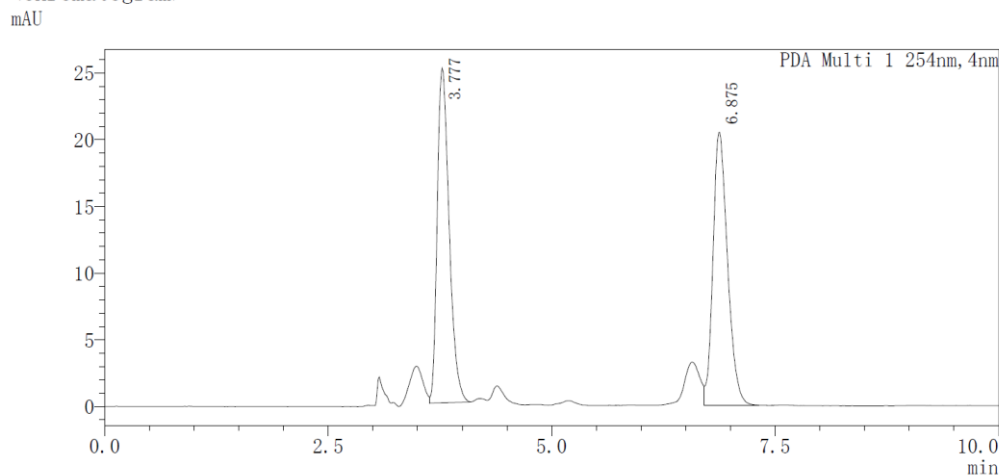

<Peak Table>

PDA Ch1 254nm

| No.   | Ret. Time (min) | Height (mAU) | Height% | Area (mAU*min) | Area%   |
|-------|-----------------|--------------|---------|----------------|---------|
| 1     | 3.777           | 25096        | 55.074  | 232686         | 50.123  |
| 2     | 6.875           | 20472        | 44.926  | 231541         | 49.877  |
| Total |                 | 45568        | 100.000 | 464227         | 100.000 |

<Chromatogram>

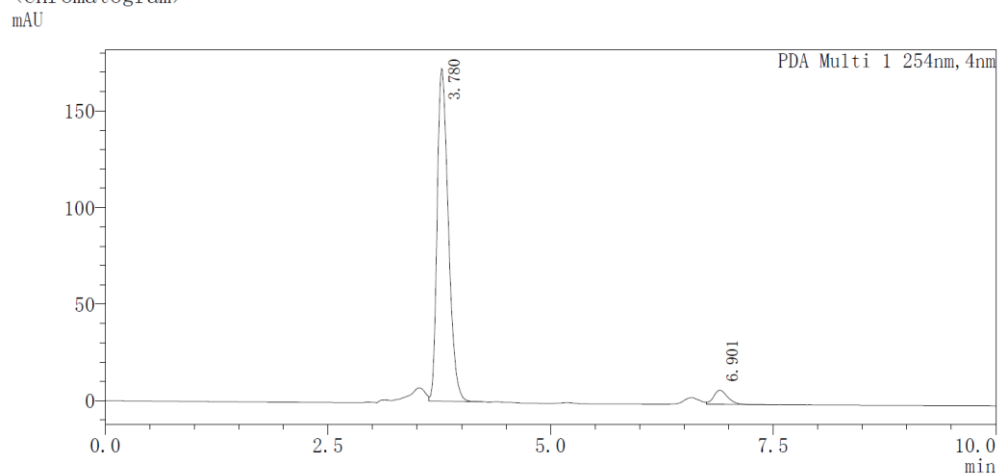

<Peak Table>

PDA Ch1 254nm

| No.   | Ret. Time (min) | Height (mAU) | Height% | Area (mAU*min) | Area%   |
|-------|-----------------|--------------|---------|----------------|---------|
| 1     | 3.780           | 172096       | 95.929  | 1504098        | 94.995  |
| 2     | 6.901           | 7303         | 4.071   | 79254          | 5.005   |
| Total |                 | 179399       | 100.000 | 1583352        | 100.000 |

## 5. References:

- [1]. C. Cheng, B. Wan, B. Zhou, Y. Gu, Y. Zhang, *Chem. Sci.* **2019**, *10*, 9853– 9858.
- [2]. L. J. Zhou, S. L. Li, B. Xu, D. T. Ji, L. Z. Wu, Y. Liu, Z. M. Zhang, J. Zhang, *Angew. Chem. Int. Ed.* **2020**, *59*, 2769; *Angew. Chem.* **2020**, *132*, 2791.
- [3]. Zhang, Z.-M.; Xu, B.; Qian, Y.; Wu, L.; Wu, Y.; Zhou, L.; Liu, Y.; Zhang, J. L. *Angew. Chem. Int. Ed.* **2018**, *57*, 10373-10377; *Angew. Chem.* **2018**, *130*, 10530 –10534
- [4]. J. Pedroni, T. Saget, P. A. Donets and N. Cramer, *Chem. Sci.* **2015**, *6*, 5164.
- [5]. L. Mengozzi, A. Gualandi, and P. G. Cozzi, *Chem. Sci.* **2014**, *5*, 3915.
- [6] CCDC 2068939 (**5h**) contains the supplementary crystallographic data for this paper. These data are provided free of charge by The Cambridge Crystallographic Data Centre.



## 6. NMR spectra of products:

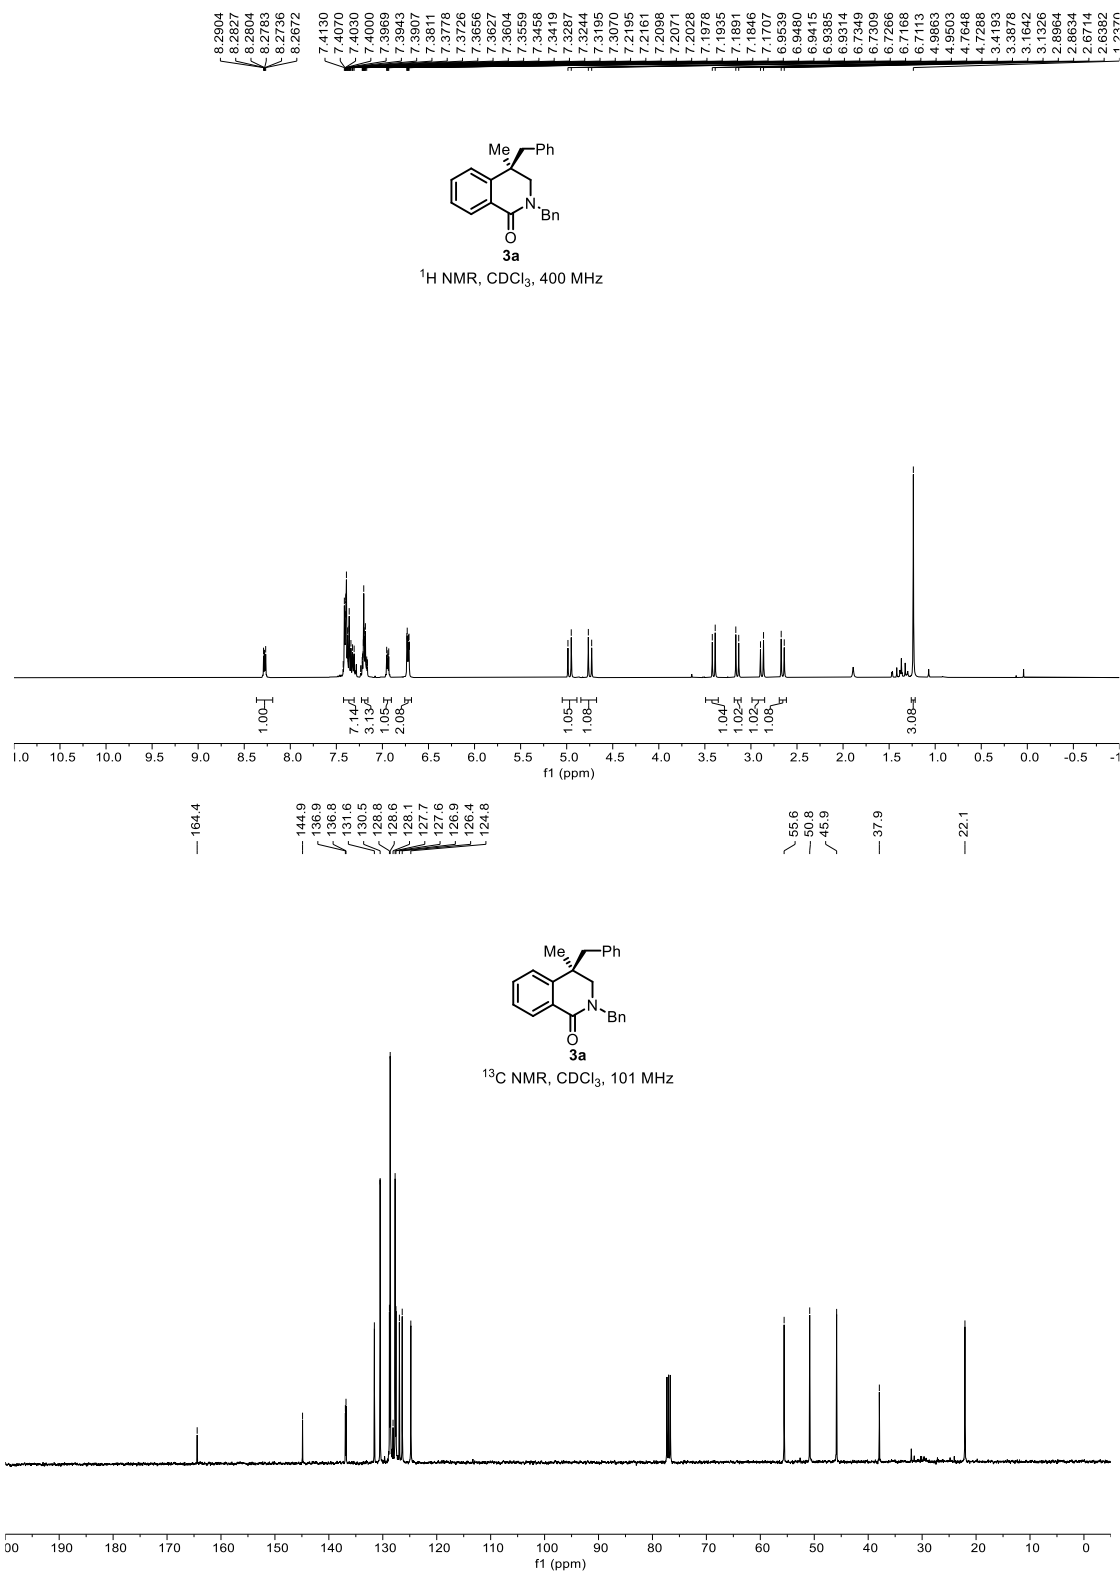

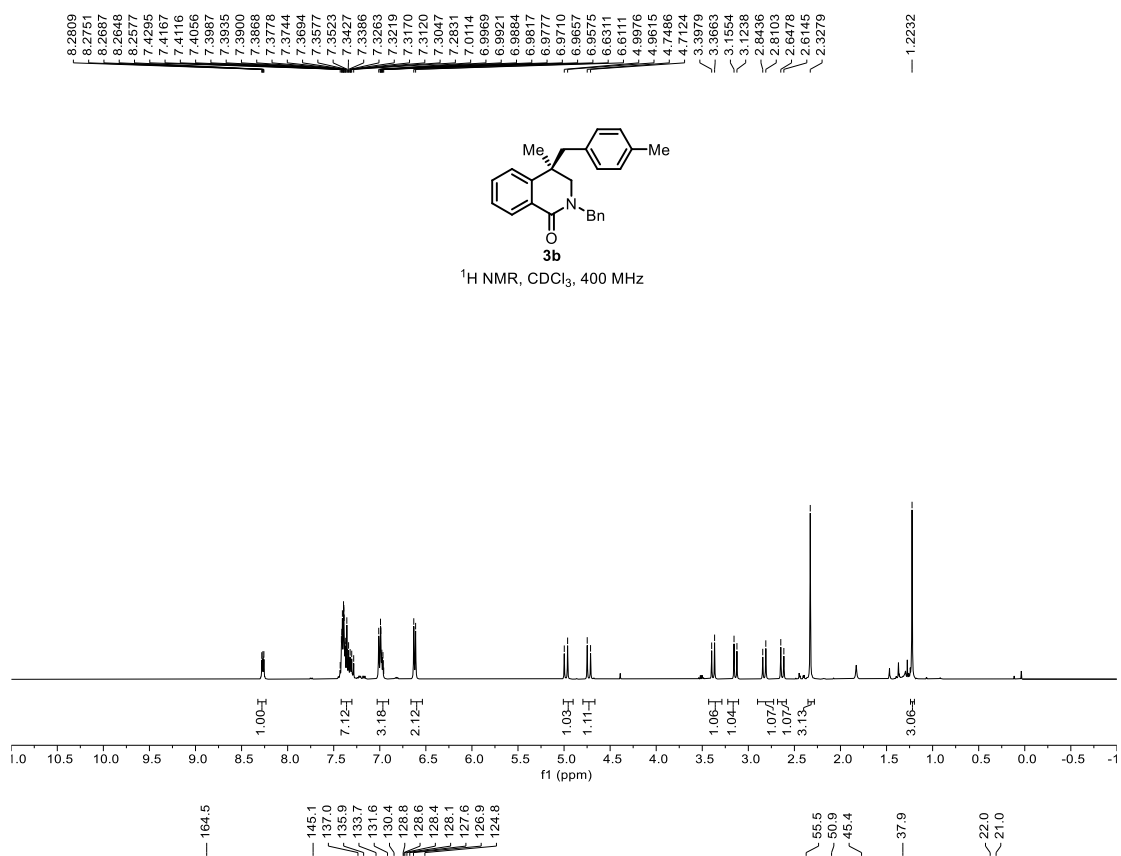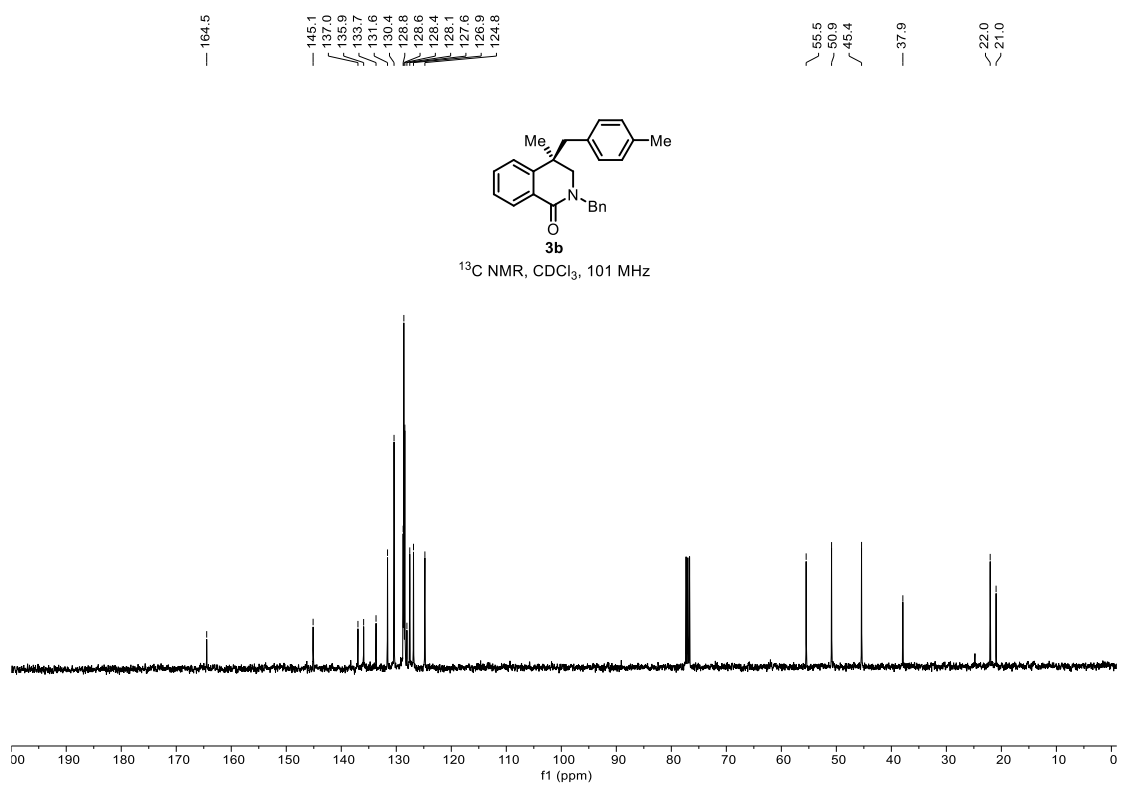

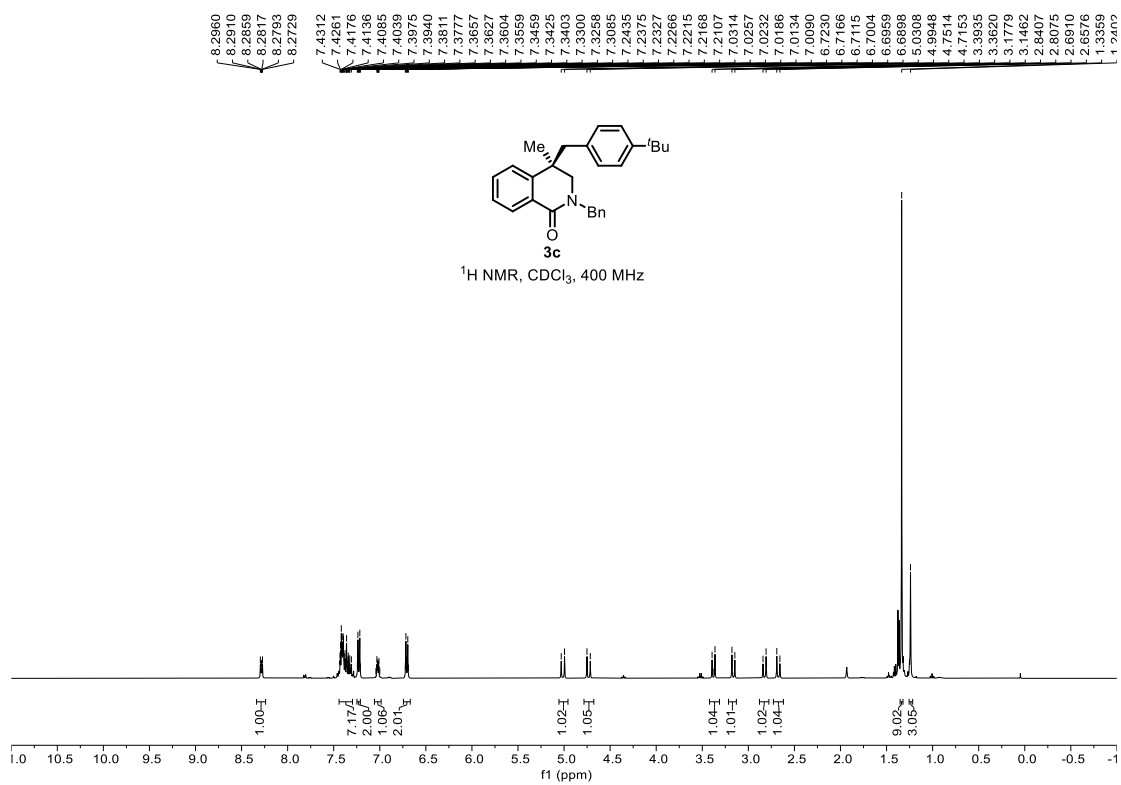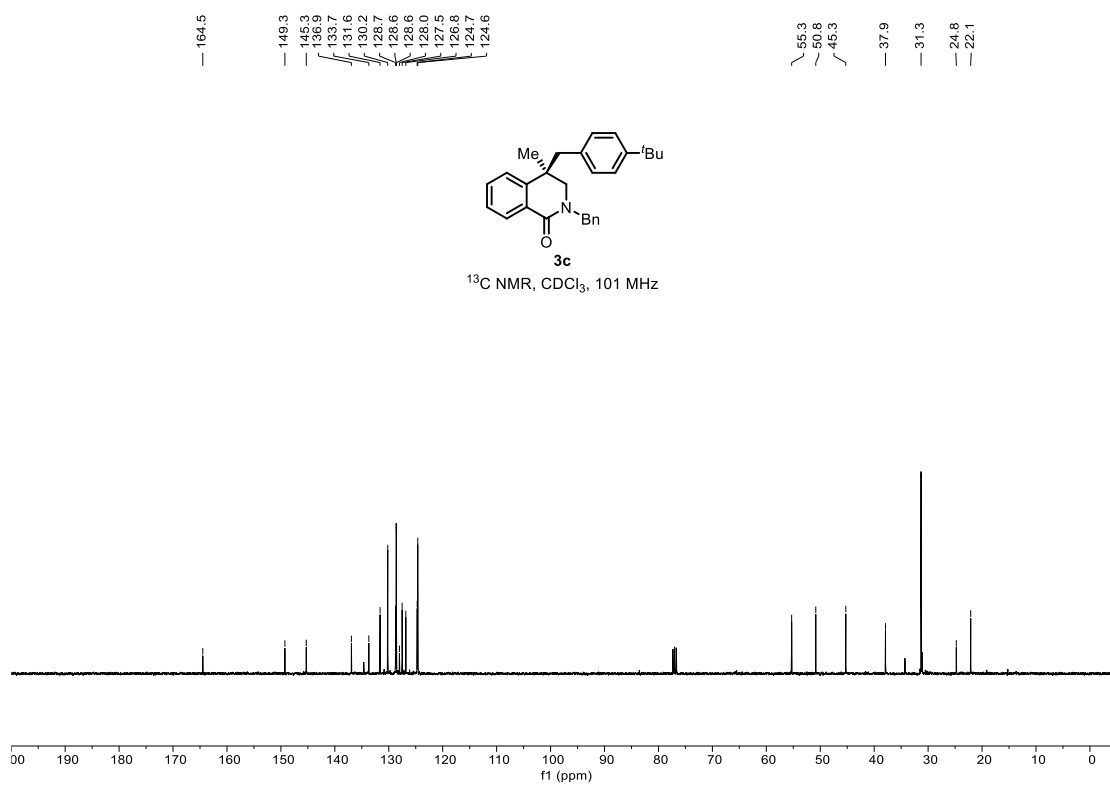

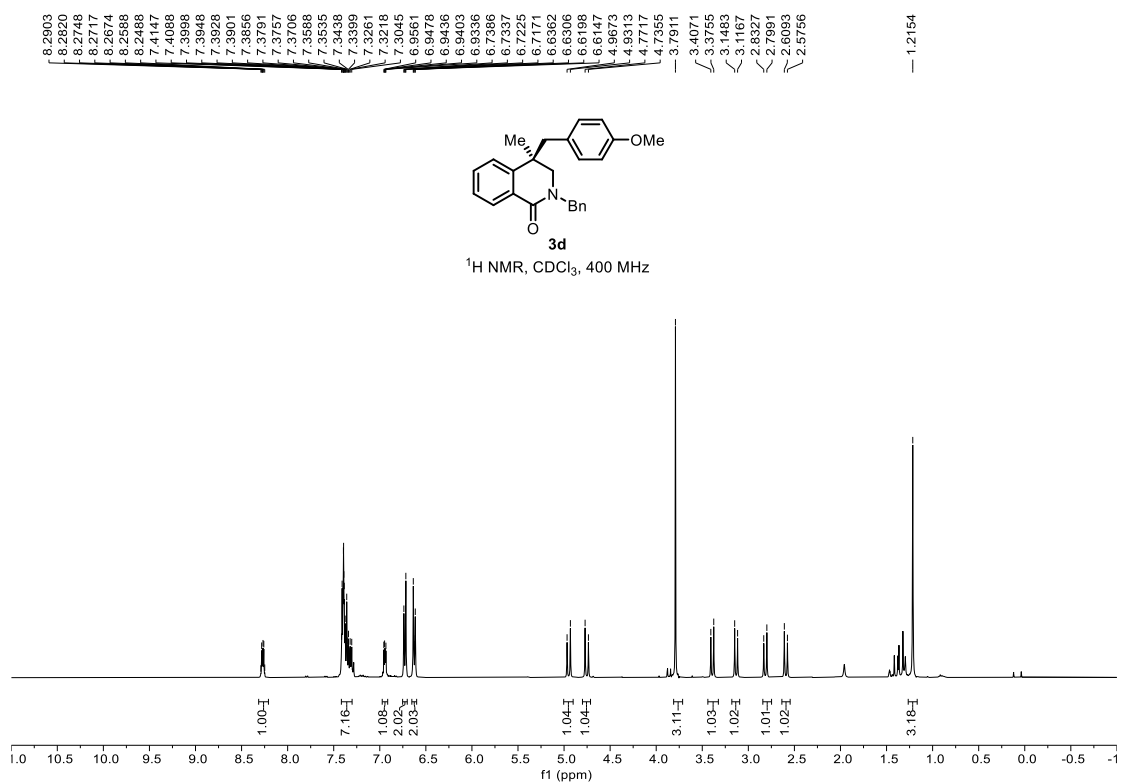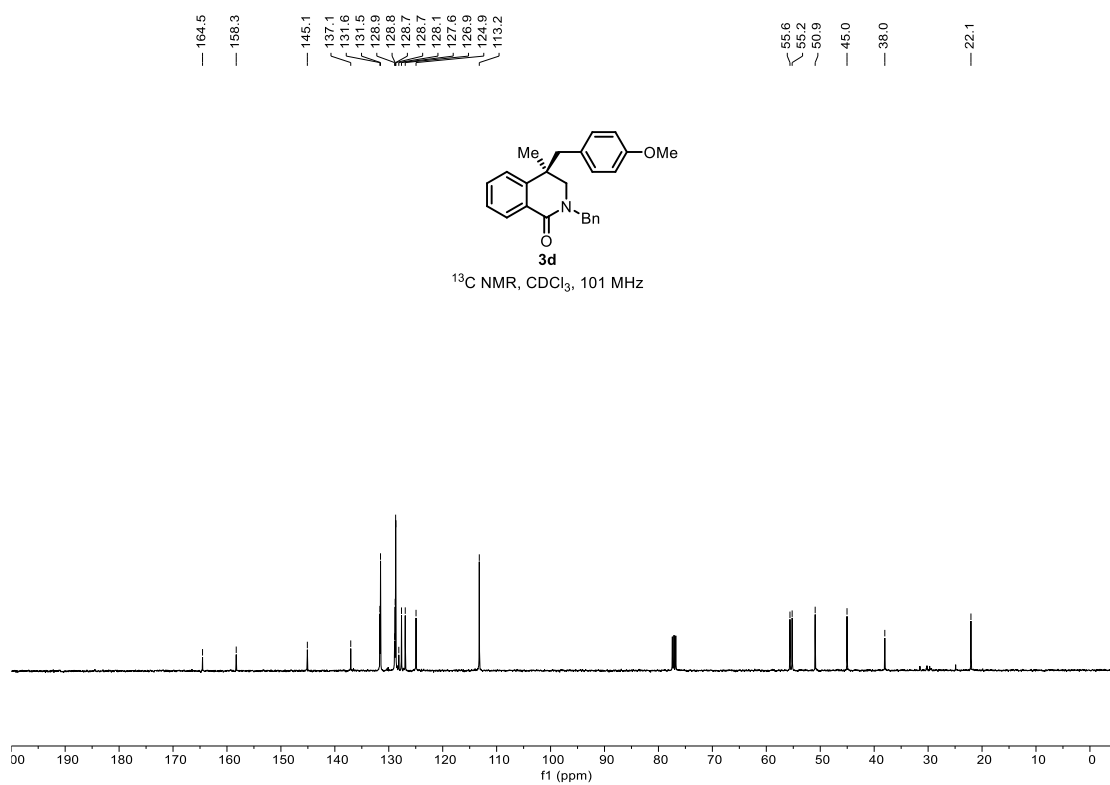

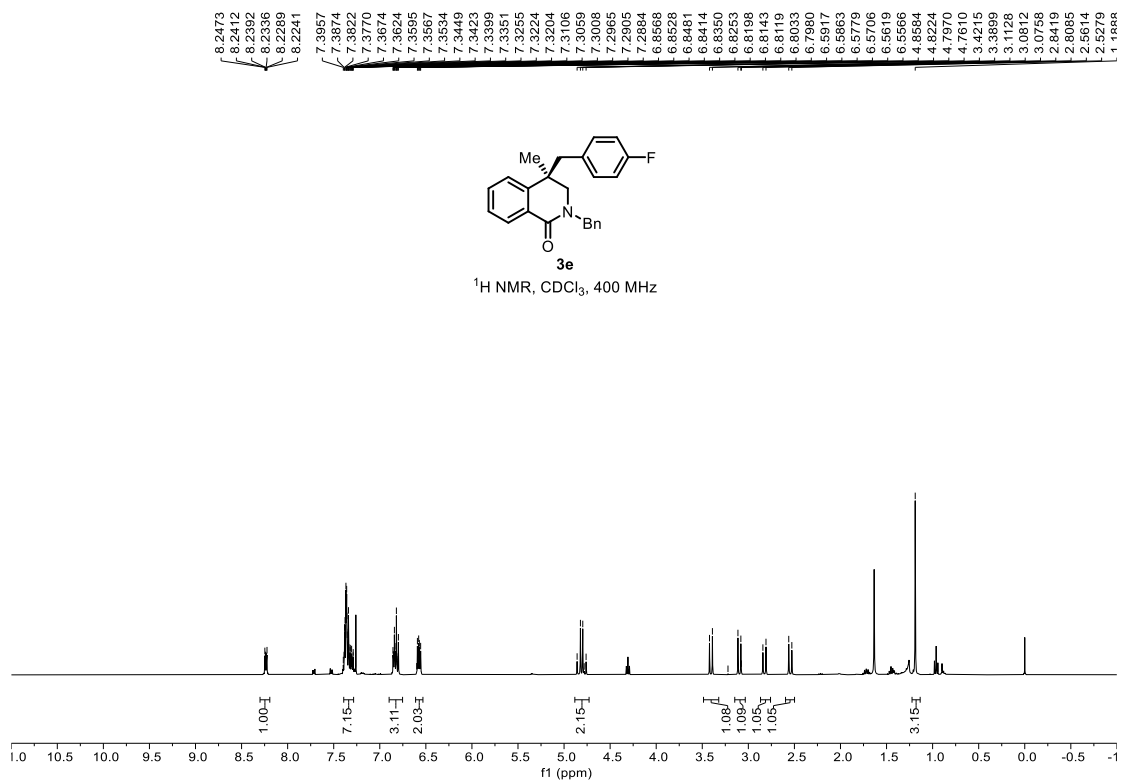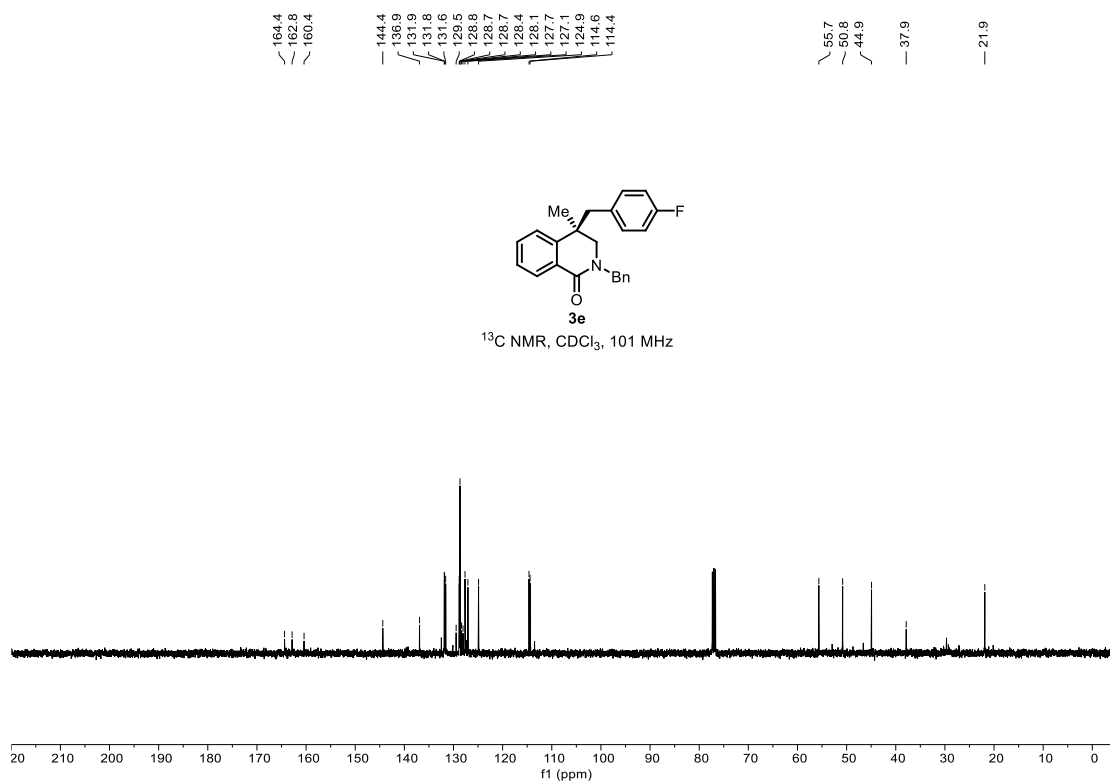

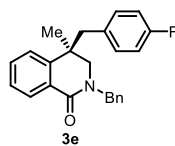

$^{19}\text{F}$  NMR,  $\text{CDCl}_3$ , 376 MHz

— -116.5053

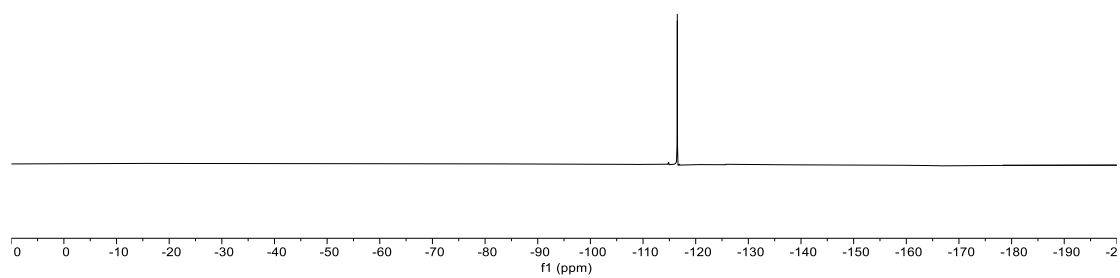

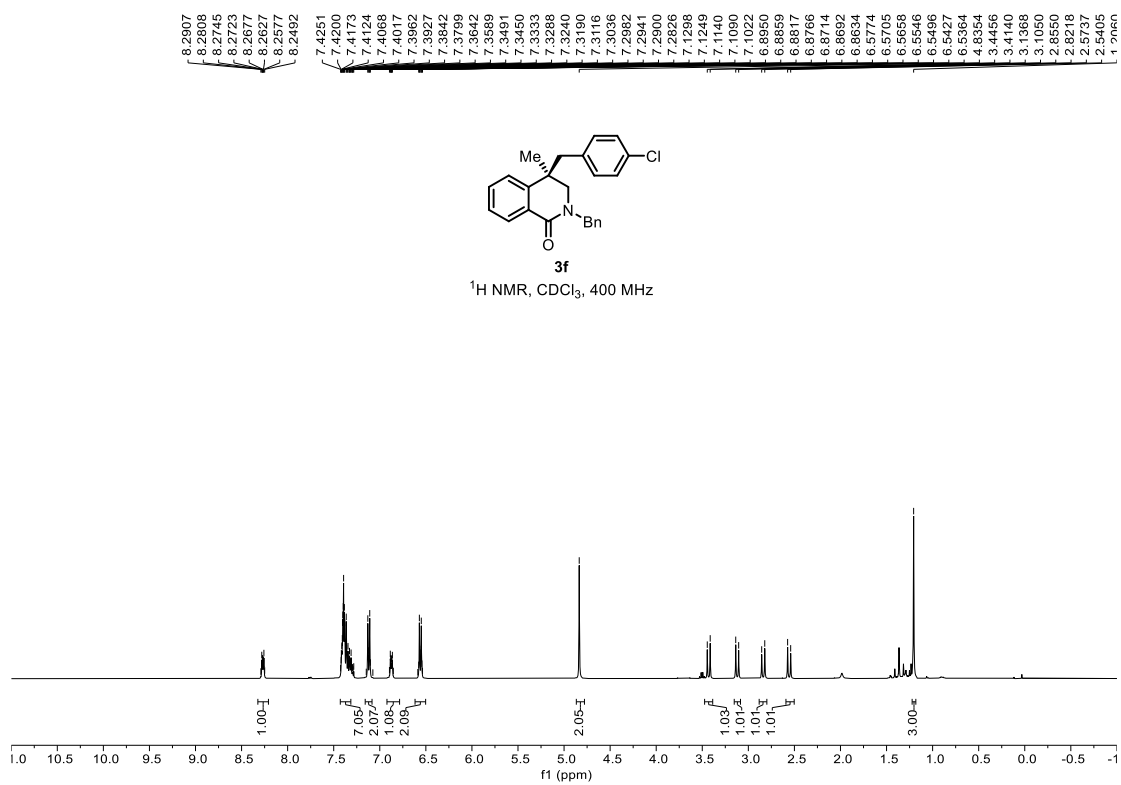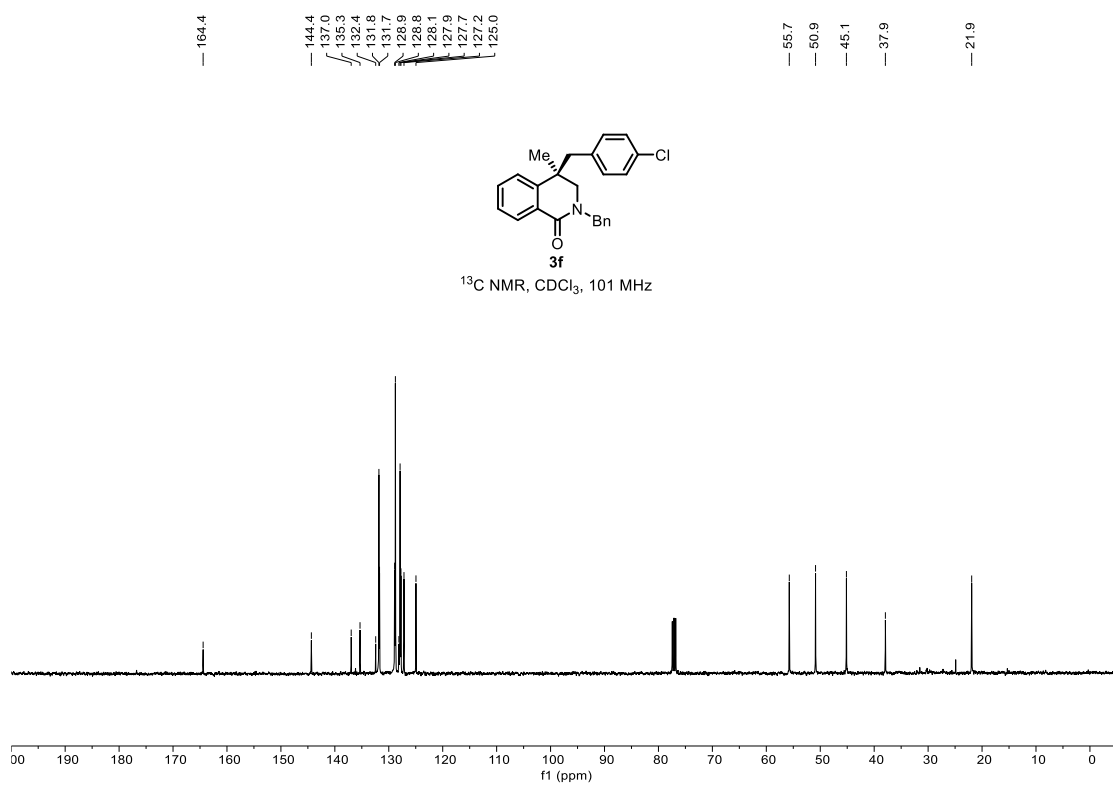

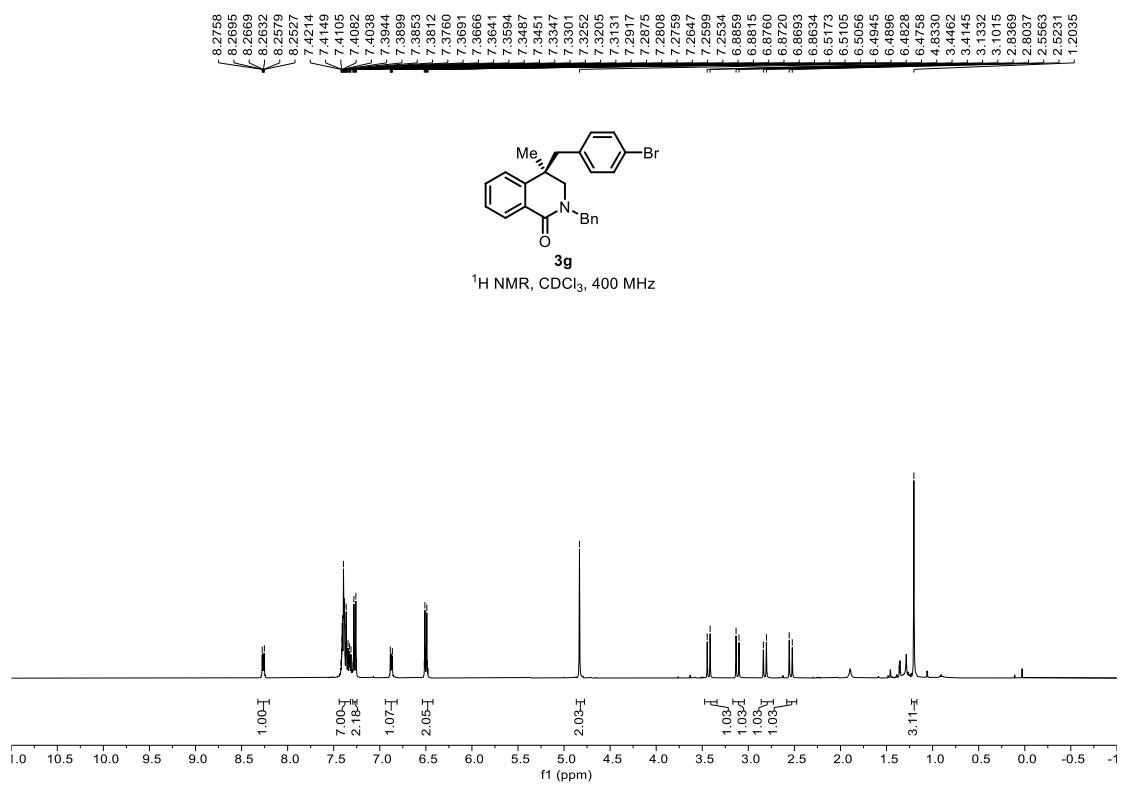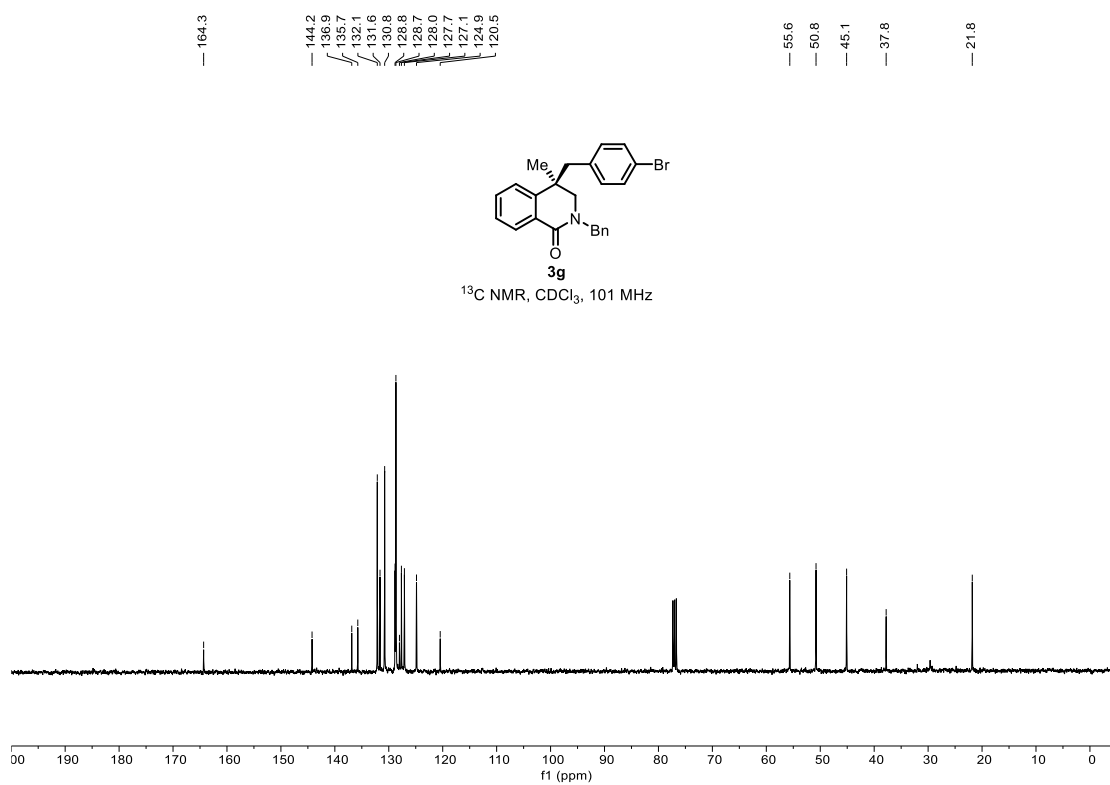



8.3231  
8.3157  
8.3122  
8.3060  
8.3000  
8.2922  
7.6216  
7.6179  
7.6130  
7.6038  
7.6005  
7.5978  
7.5924  
7.4927  
7.4888  
7.4839  
7.4703  
7.4665  
7.4511  
7.4459  
7.4412  
7.4366  
7.4310  
7.4219  
7.4204  
7.4142  
7.4035  
7.4002  
7.3943  
7.3906  
7.3869  
7.3830  
7.3780  
7.3721  
7.3677  
7.3642  
7.3572  
7.3539  
7.3501  
7.3458  
7.3418  
7.3352  
7.3283  
7.3205  
7.3143  
7.3106  
7.3066  
7.3034  
7.3009  
7.2915  
6.9965  
6.9913  
6.9845  
6.9750  
6.8046  
6.7997  
6.7890  
6.7842  
6.7783  
4.9948  
4.9488  
4.8365  
4.8005  
3.4583  
3.4267  
3.2110  
3.1793  
2.9405  
2.9075  
2.7157  
2.6626  
1.2817

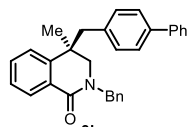

$^1\text{H}$  NMR,  $\text{CDCl}_3$ , 400 MHz

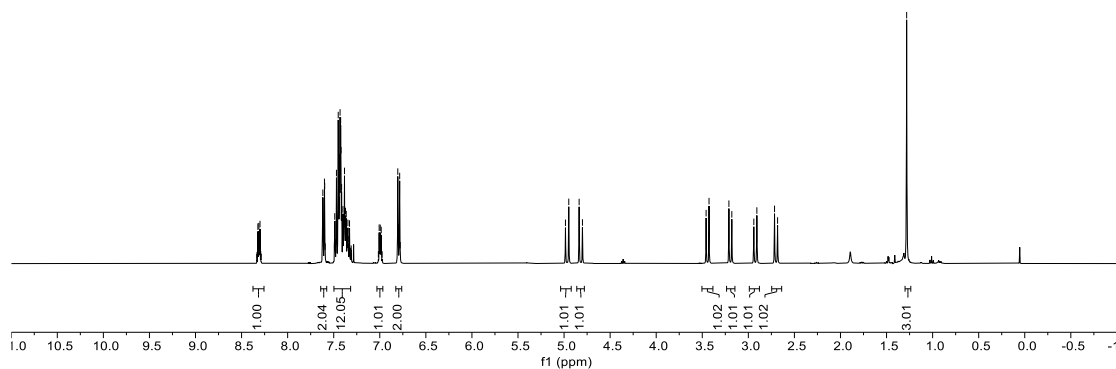

164.4  
144.8  
140.6  
139.2  
136.9  
135.9  
131.6  
130.9  
128.8  
128.7  
128.7  
128.6  
127.6  
127.1  
127.0  
126.9  
126.4  
124.9  
55.5  
50.8  
45.4  
38.0  
22.0

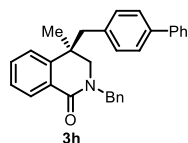

$^{13}\text{C}$  NMR,  $\text{CDCl}_3$ , 101 MHz

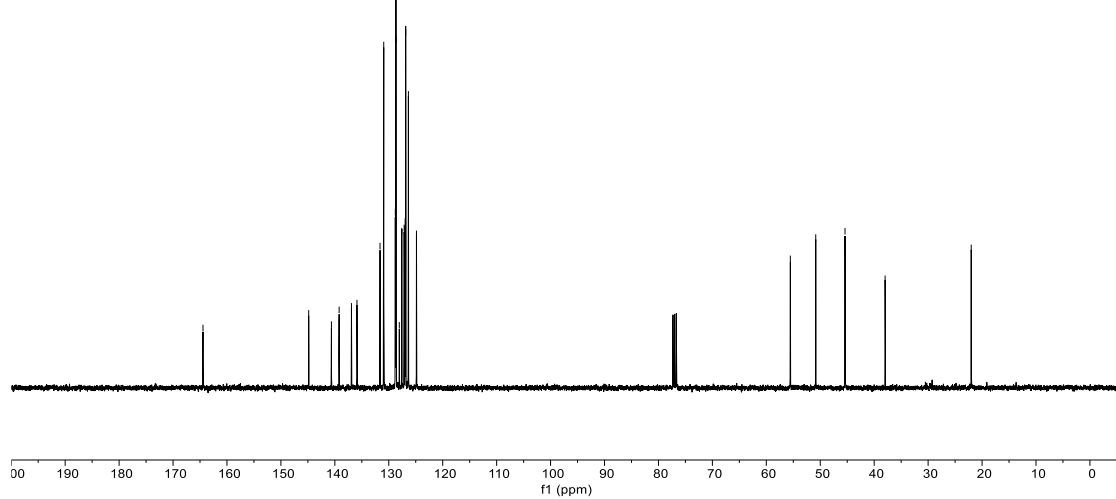

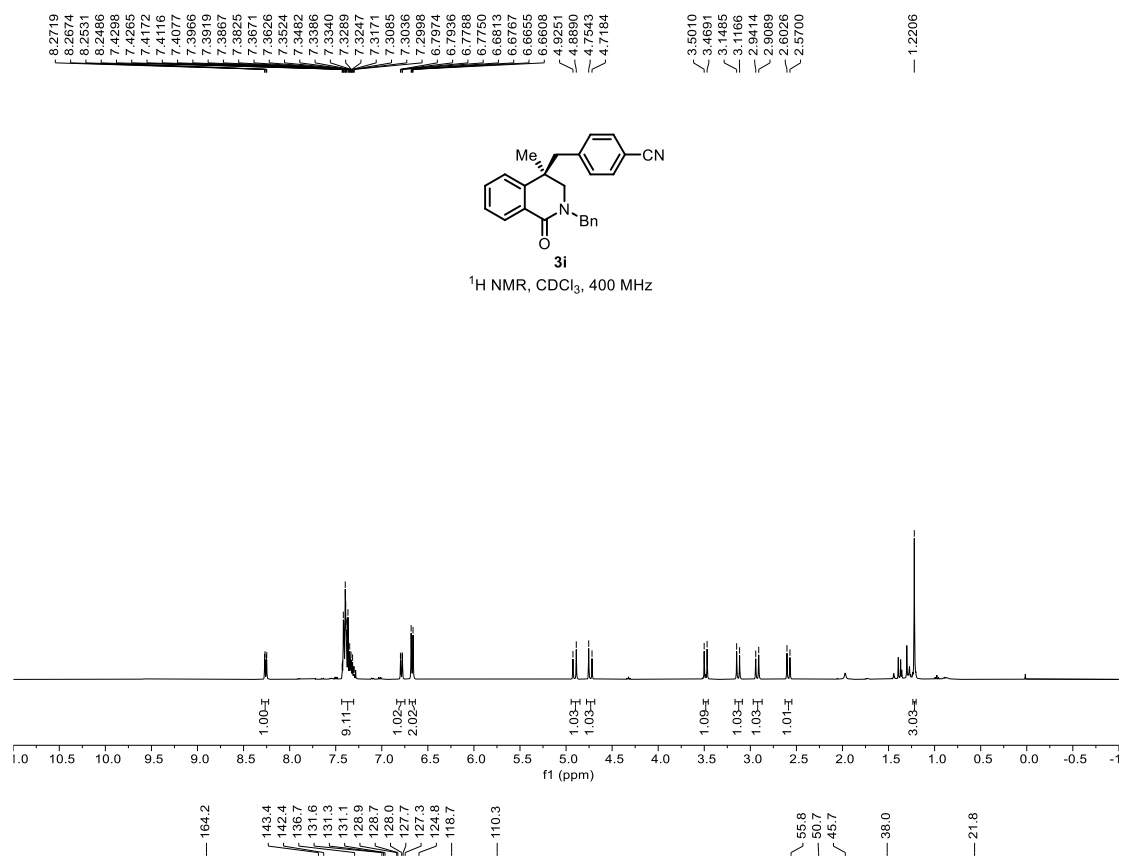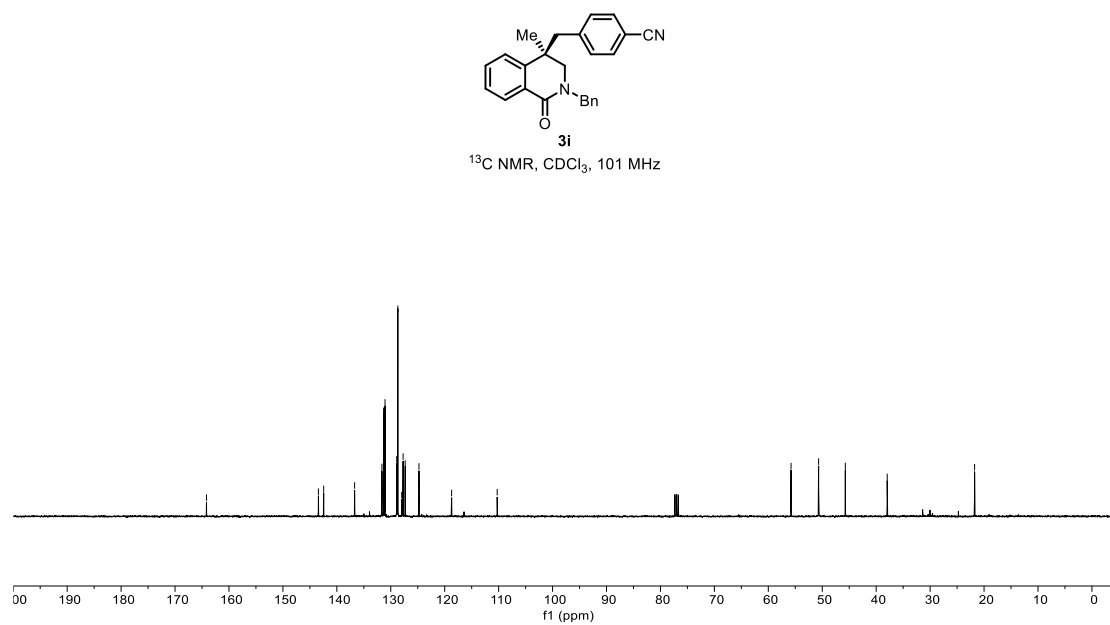

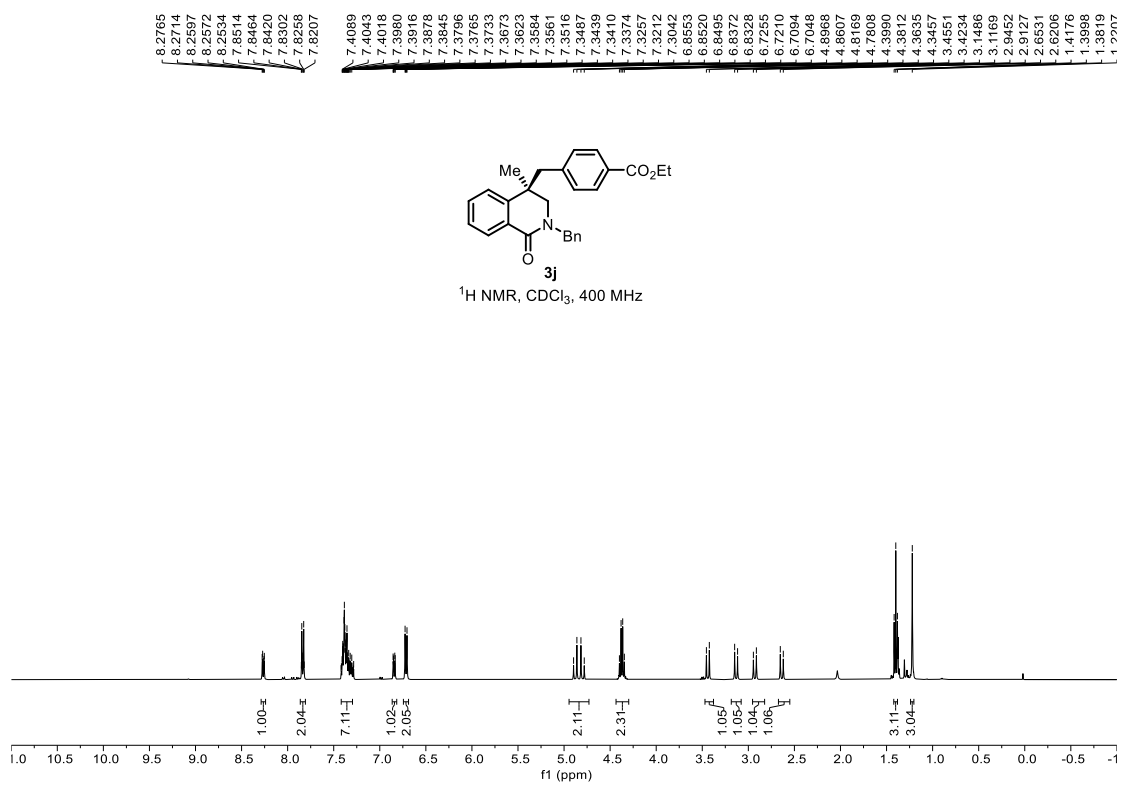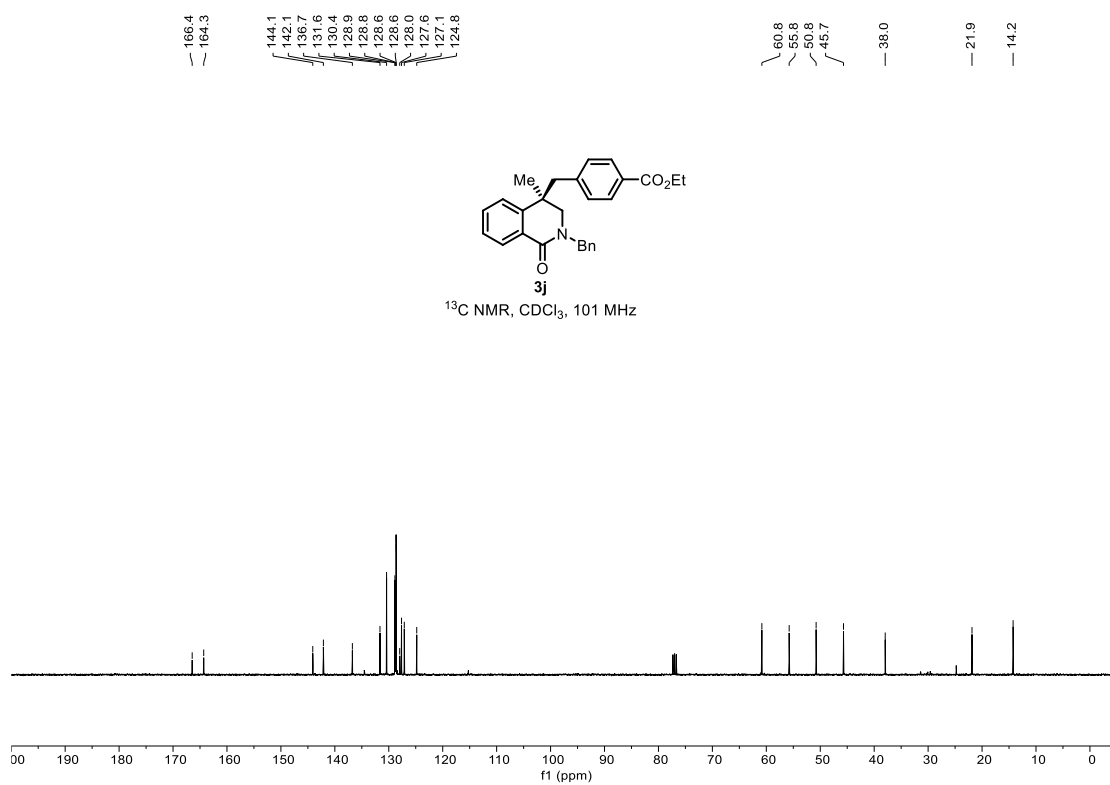

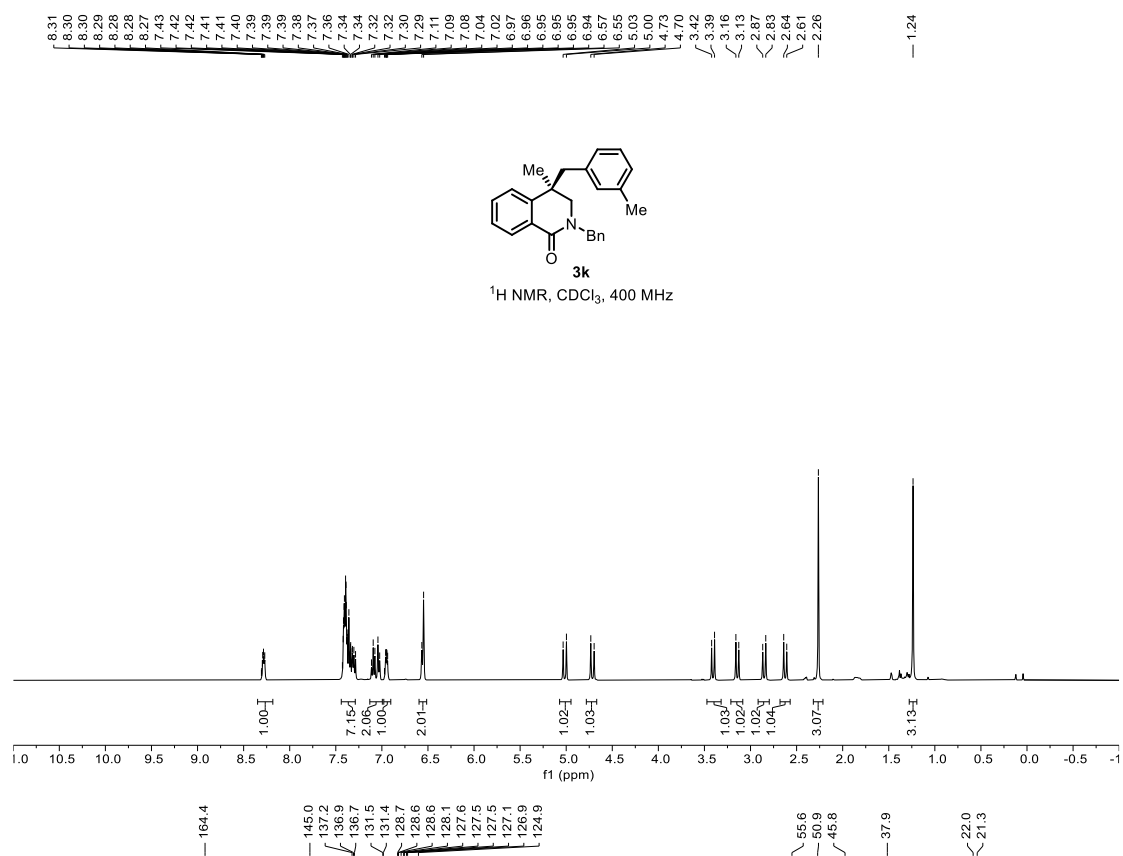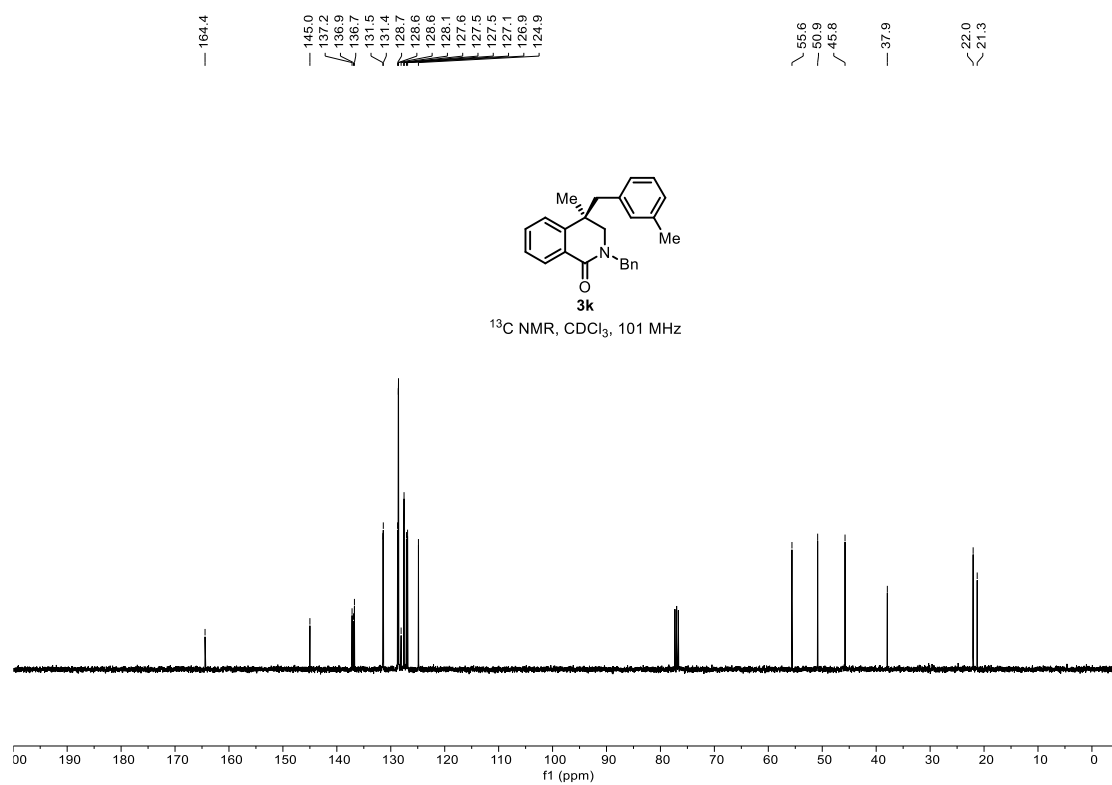

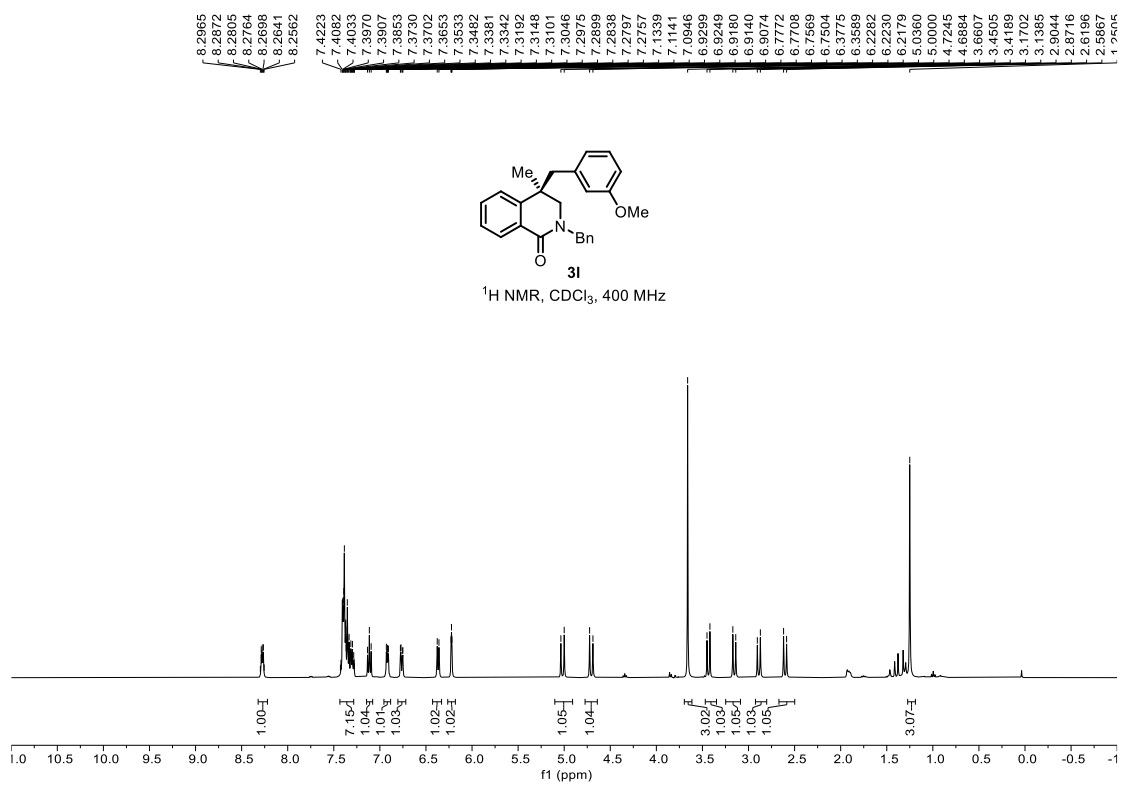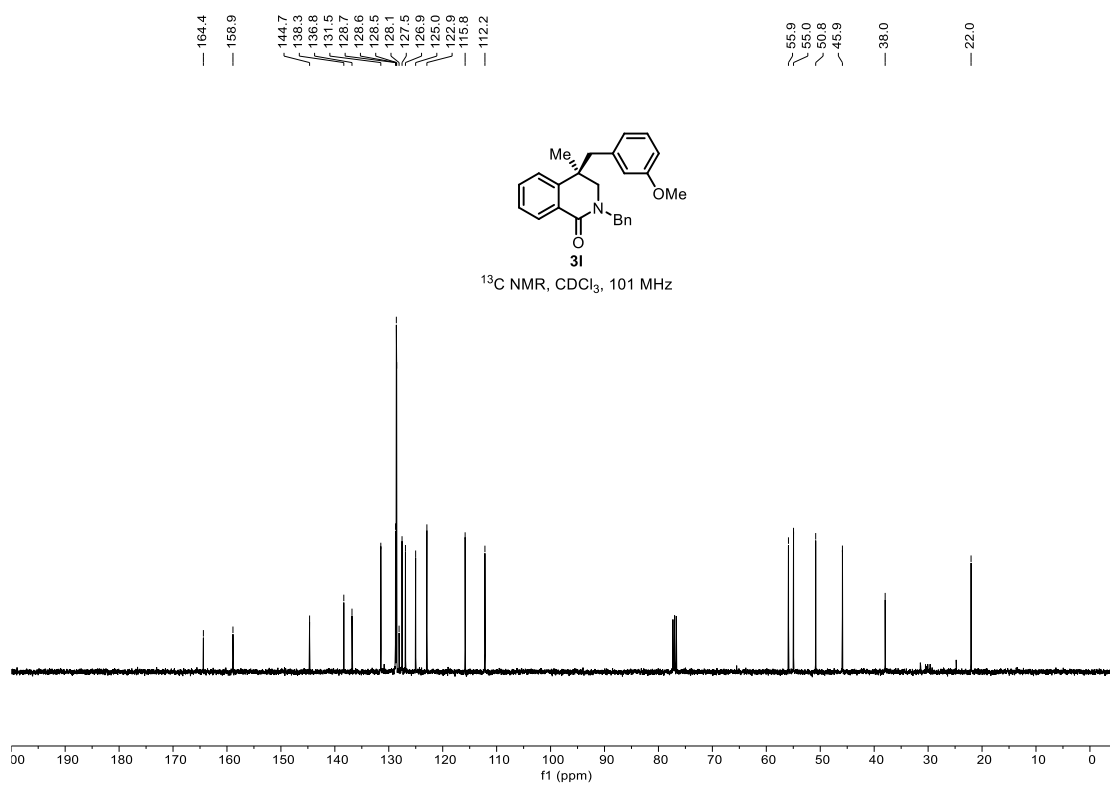

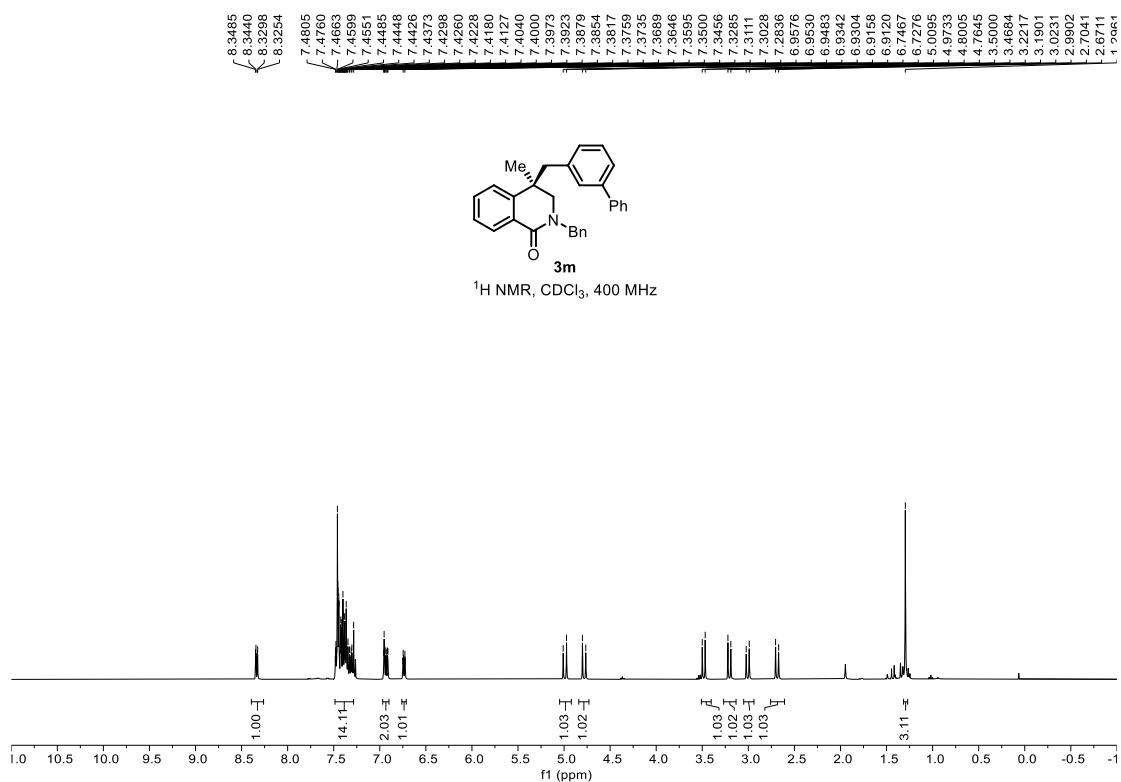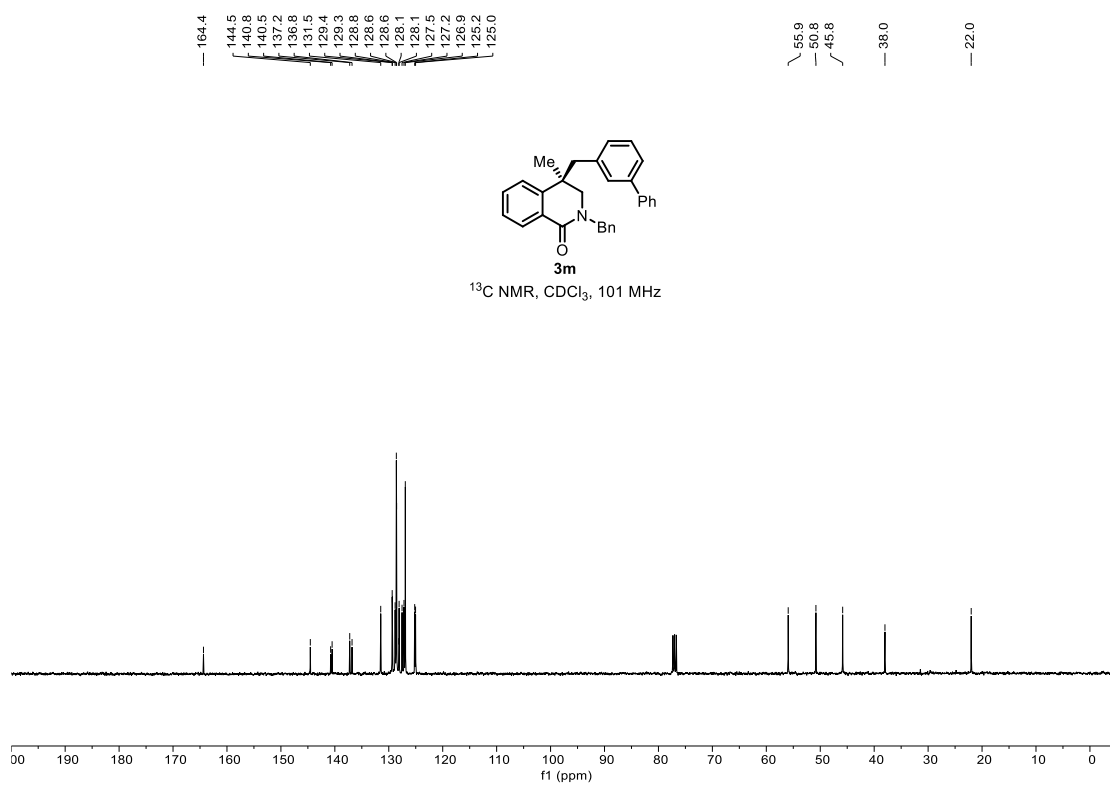

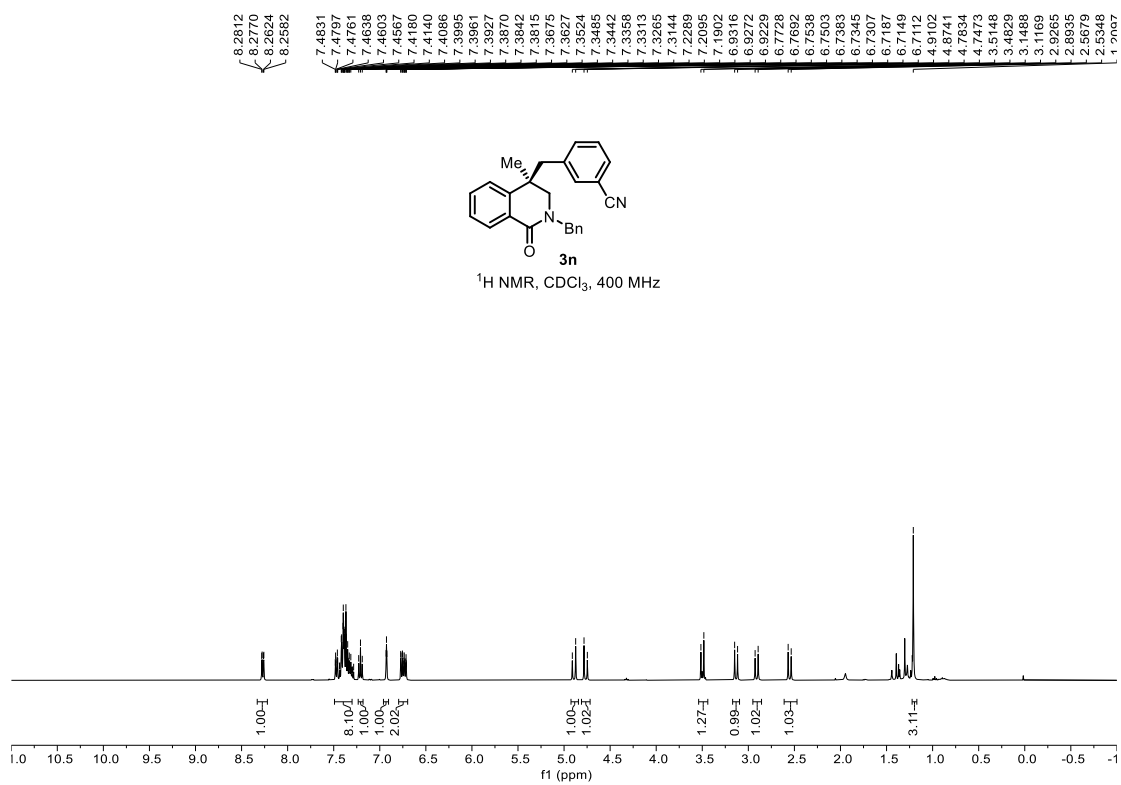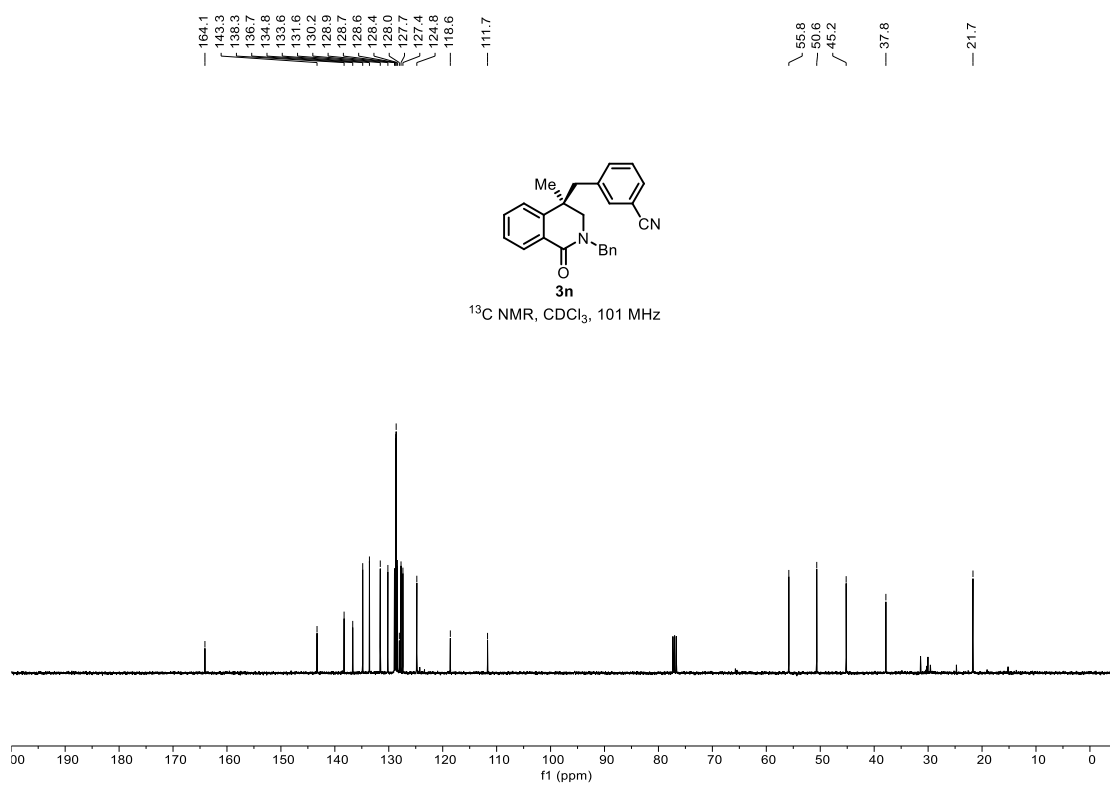

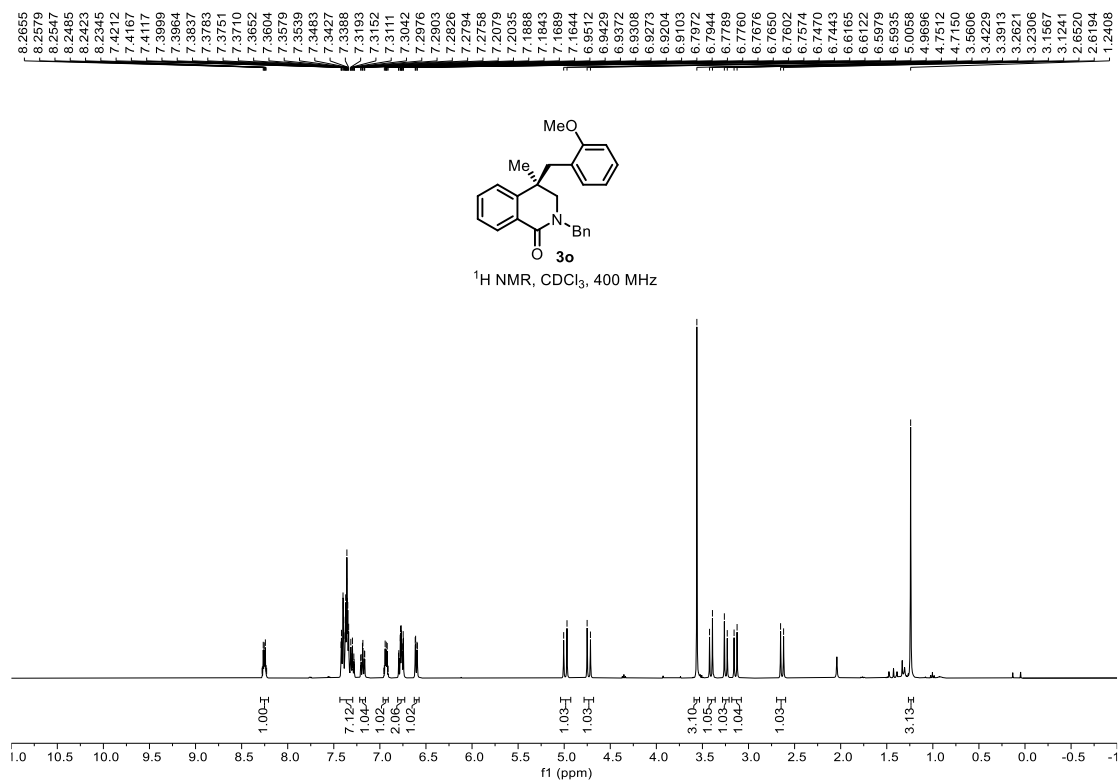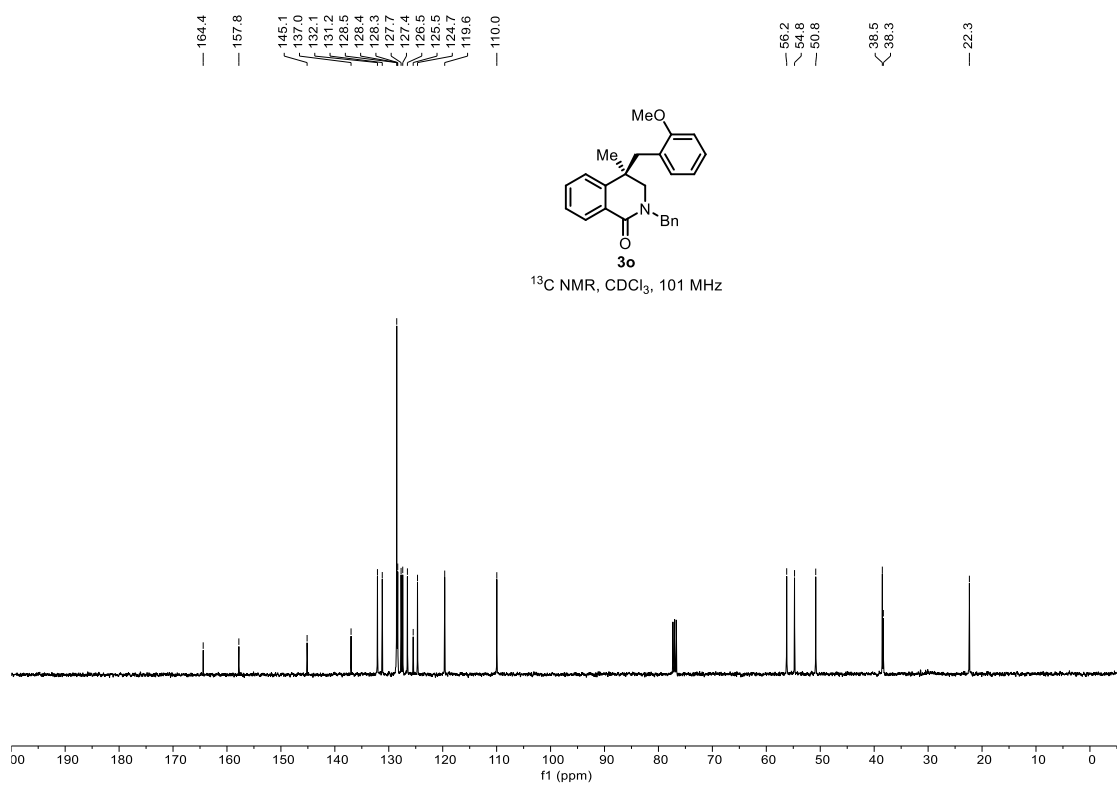



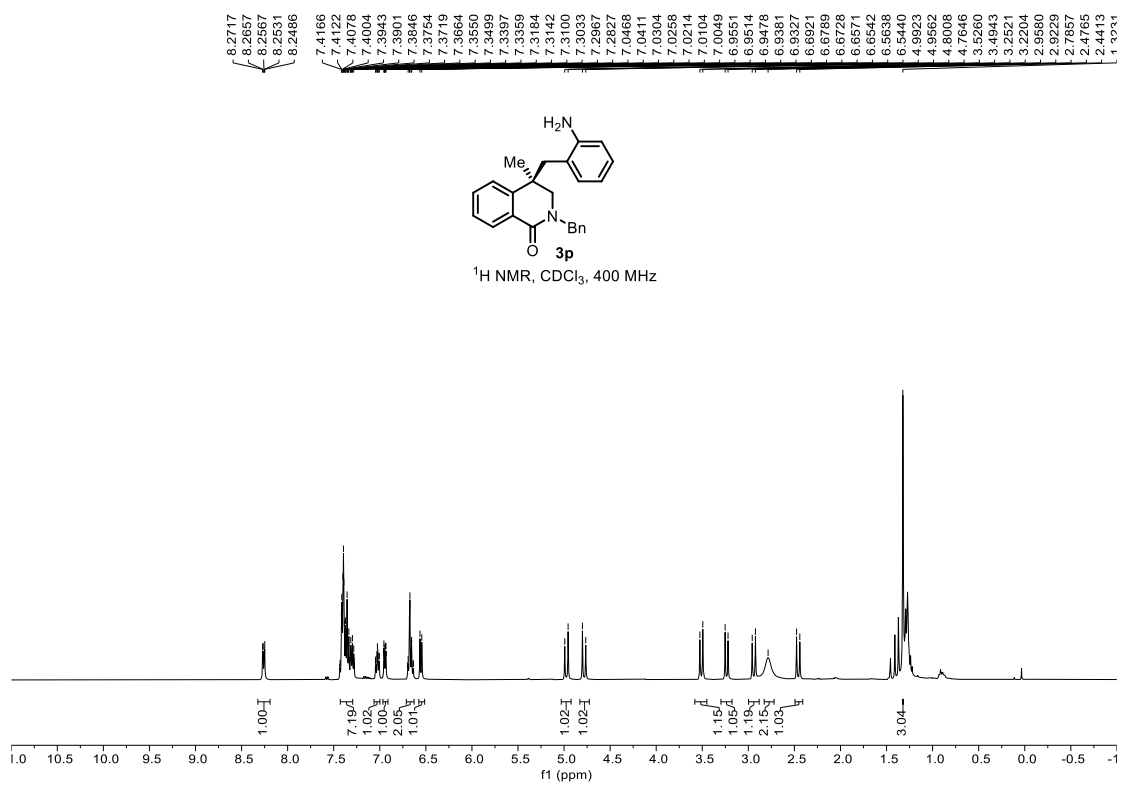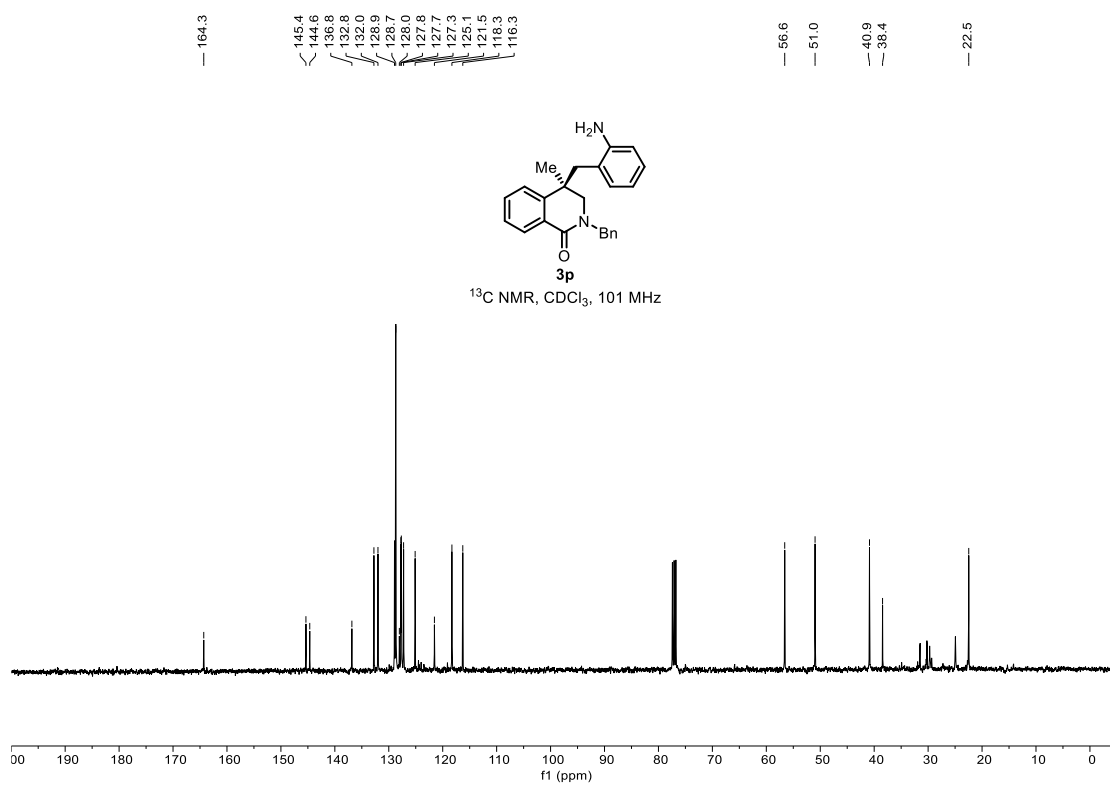

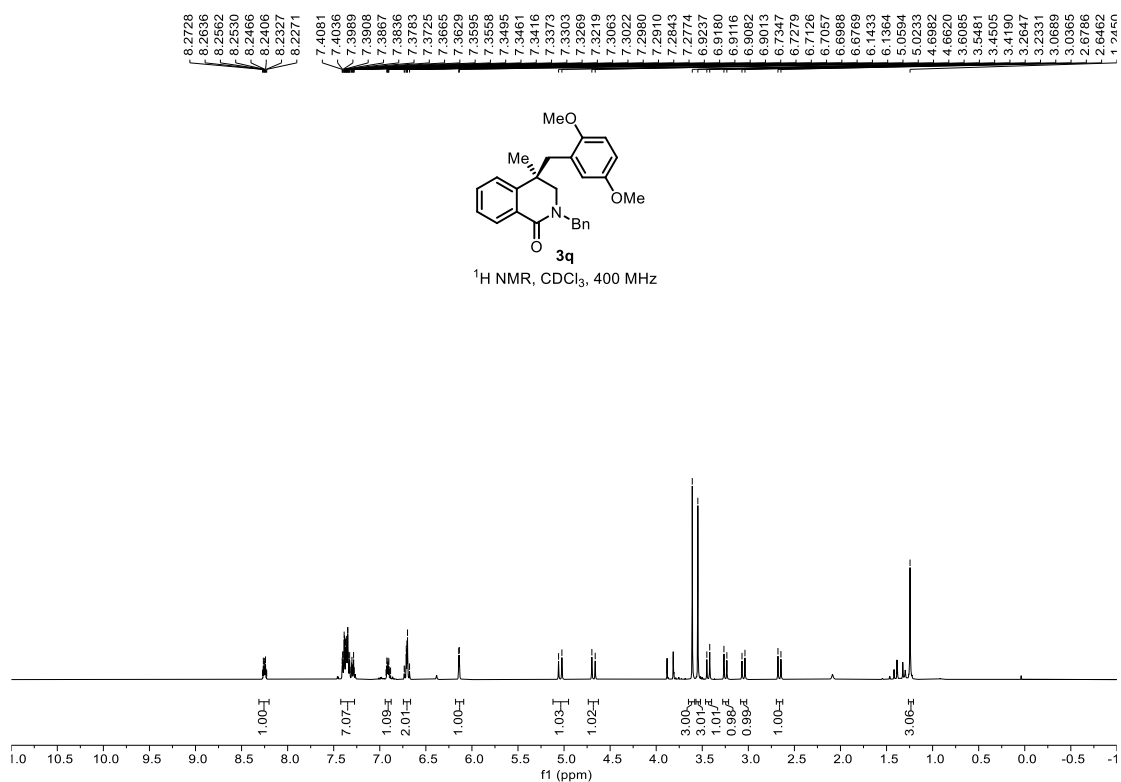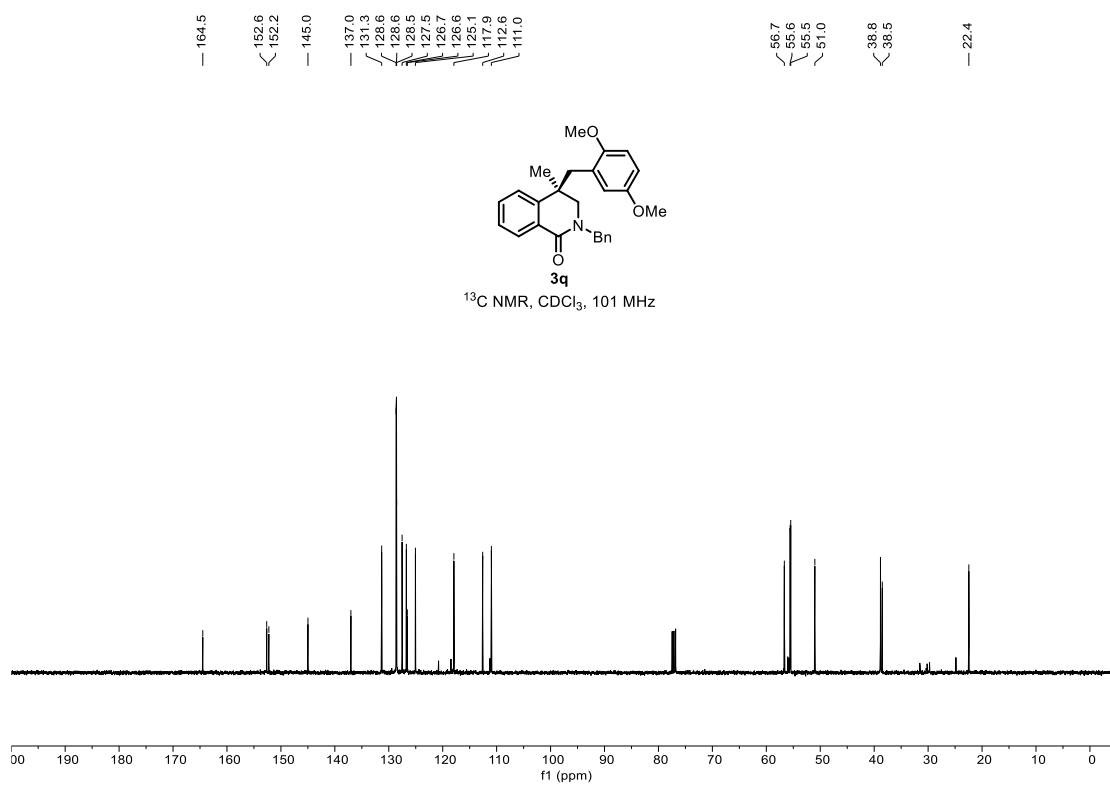

8.3469  
8.3430  
8.3277  
8.3239  
8.3343  
7.8295  
7.8214  
7.8173  
7.8107  
7.7028  
7.6962  
7.6919  
7.6837  
7.6791  
7.6729  
7.6521  
7.5009  
7.4947  
7.4895  
7.4869  
7.4836  
7.4766  
7.4689  
7.4652  
7.4552  
7.4521  
7.4466  
7.4414  
7.4366  
7.4332  
7.4241  
7.4204  
7.4172  
7.4147  
7.3991  
7.3956  
7.3903  
7.3828  
7.3786  
7.3736  
7.3638  
7.3598  
7.3453  
7.3413  
7.3372  
7.3308  
7.3239  
7.3161  
7.3062  
7.2946  
7.2906  
6.9129  
6.9098  
6.8936  
6.8905  
6.8438  
6.8395  
6.8229  
6.8186  
5.0272  
4.9910  
4.8287  
4.7927  
3.4724  
3.4408  
3.2250  
3.1934  
3.0869  
3.0539  
2.8288  
2.7958  
1.2855

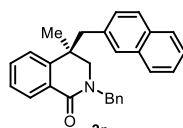

$^1\text{H}$  NMR,  $\text{CDCl}_3$ , 400 MHz

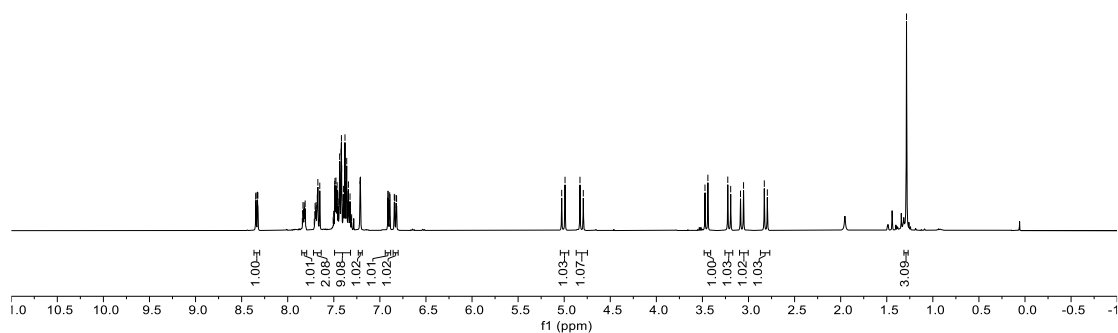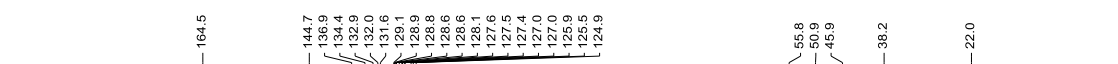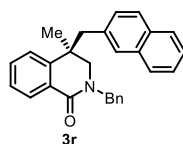

$^{13}\text{C}$  NMR,  $\text{CDCl}_3$ , 101 MHz

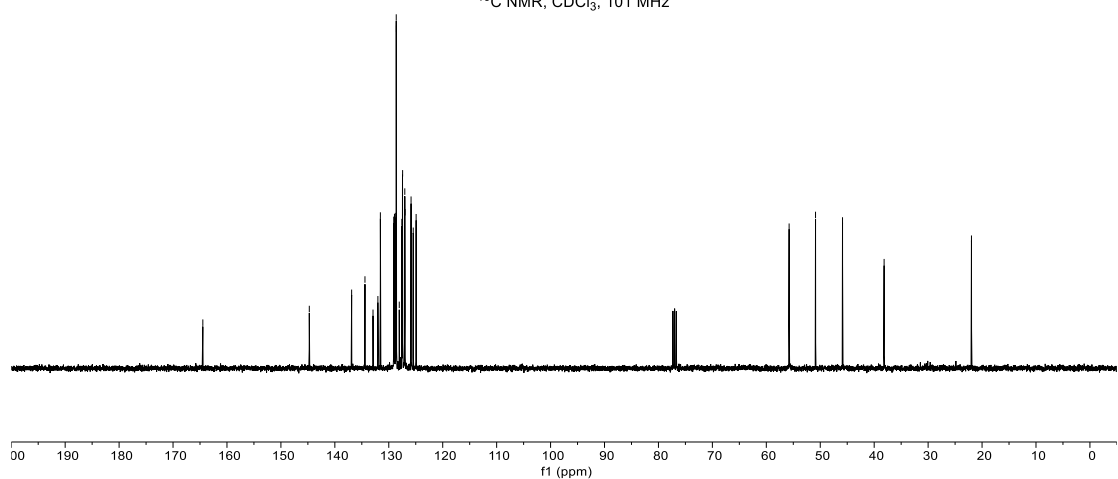

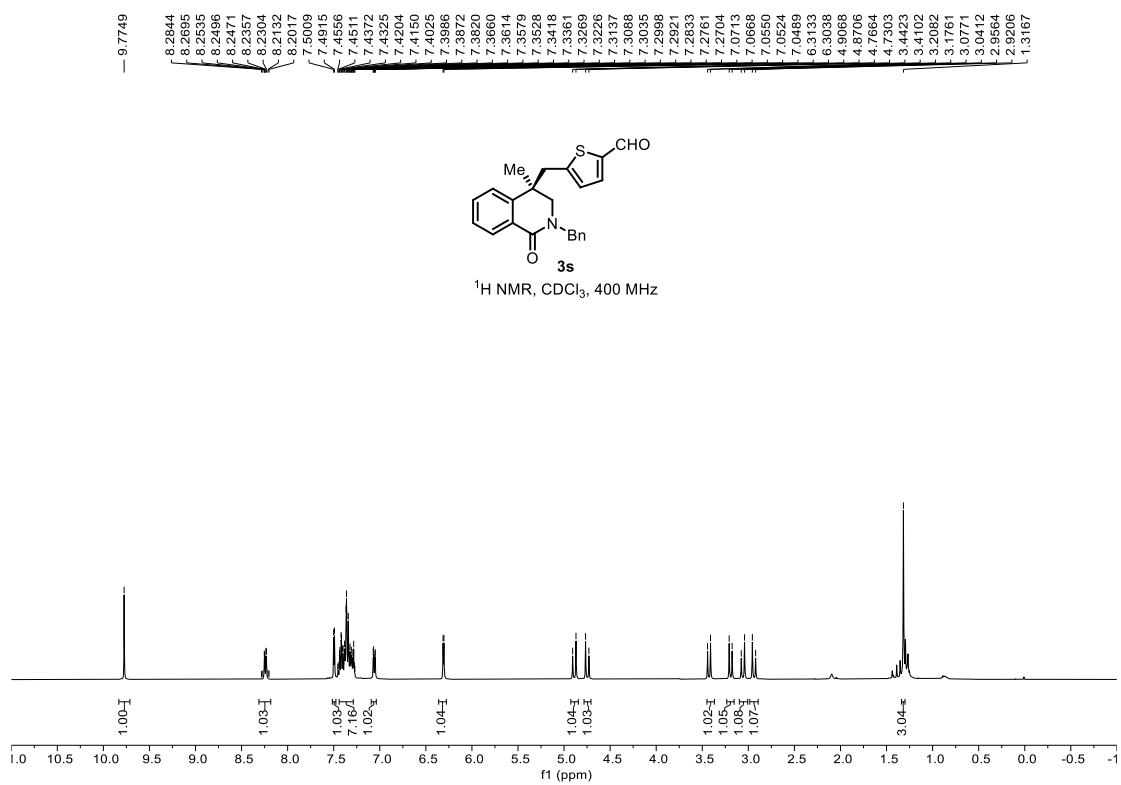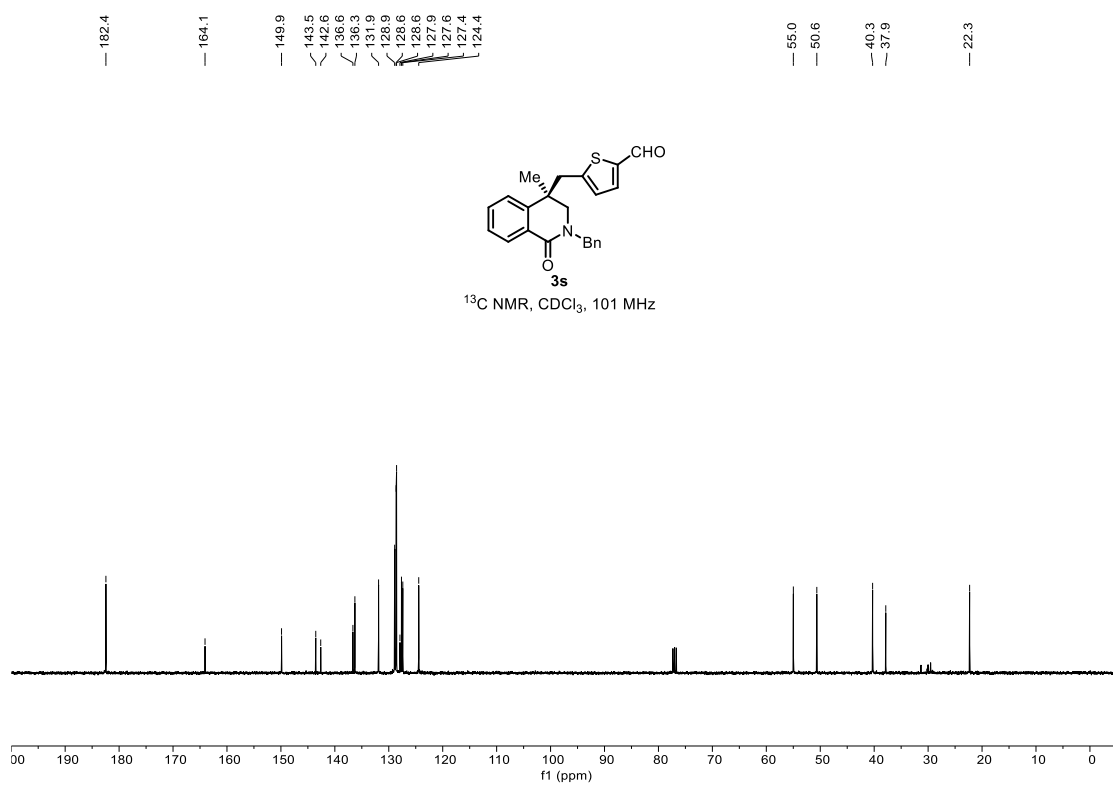

8.3590  
8.3551  
8.3402  
8.3360  
8.0531  
8.0504  
8.0362  
8.0338  
8.0311  
7.6600  
7.6429  
7.6395  
7.6351  
7.6216  
7.6173  
7.6015  
7.5973  
7.5913  
7.5801  
7.5763  
7.5572  
7.5531  
7.5371  
7.4970  
7.4833  
7.4508  
7.4449  
7.4394  
7.4366  
7.4206  
7.4173  
7.3998  
7.3956  
7.3883  
7.3851  
7.3808  
7.3768  
7.3675  
7.3627  
7.3582  
7.3527  
7.3483  
7.3338  
7.3305  
7.3264  
7.3211  
7.3140  
7.3082  
7.2836  
7.2586  
7.2326  
6.9846  
6.9613  
6.9455  
6.9422  
6.8022  
6.7980  
6.7812  
6.7770  
5.1507  
5.1146  
4.7758  
4.7396  
3.4923  
3.4608  
3.2491  
3.2175  
3.1409  
3.1073  
2.8744  
2.8408  
1.3138

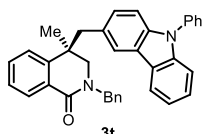

$^1\text{H}$  NMR,  $\text{CDCl}_3$ , 400 MHz

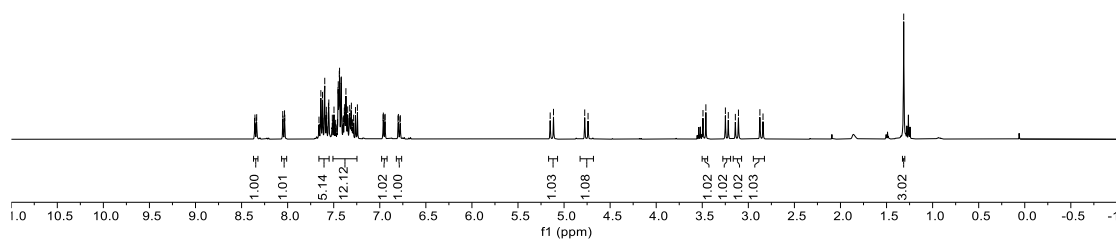

164.6  
145.1  
140.9  
139.6  
137.6  
136.9  
136.5  
129.8  
128.8  
128.6  
128.3  
128.1  
127.5  
127.3  
126.9  
125.9  
125.1  
123.1  
122.9  
121.9  
120.0  
119.9  
109.7  
108.9

55.8  
51.0  
45.9  
38.3  
21.9

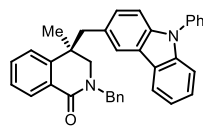

$^{13}\text{C}$  NMR,  $\text{CDCl}_3$ , 101 MHz

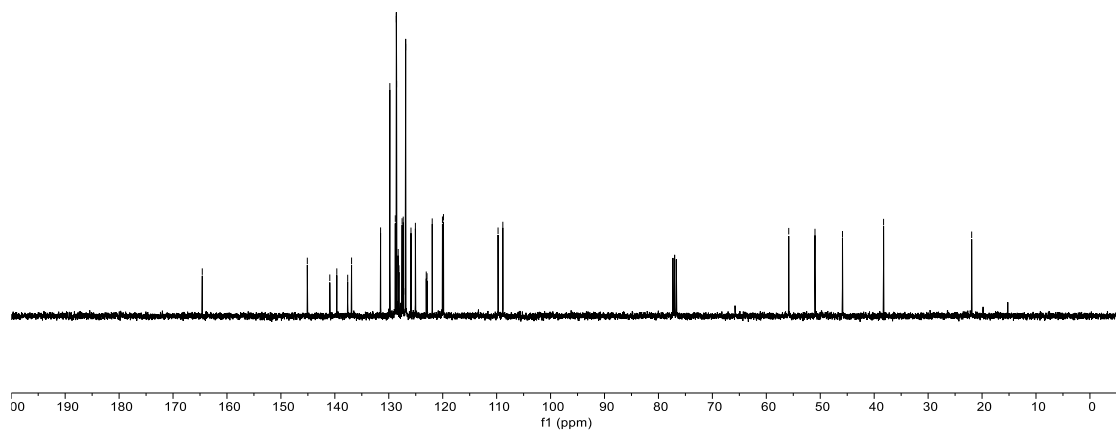

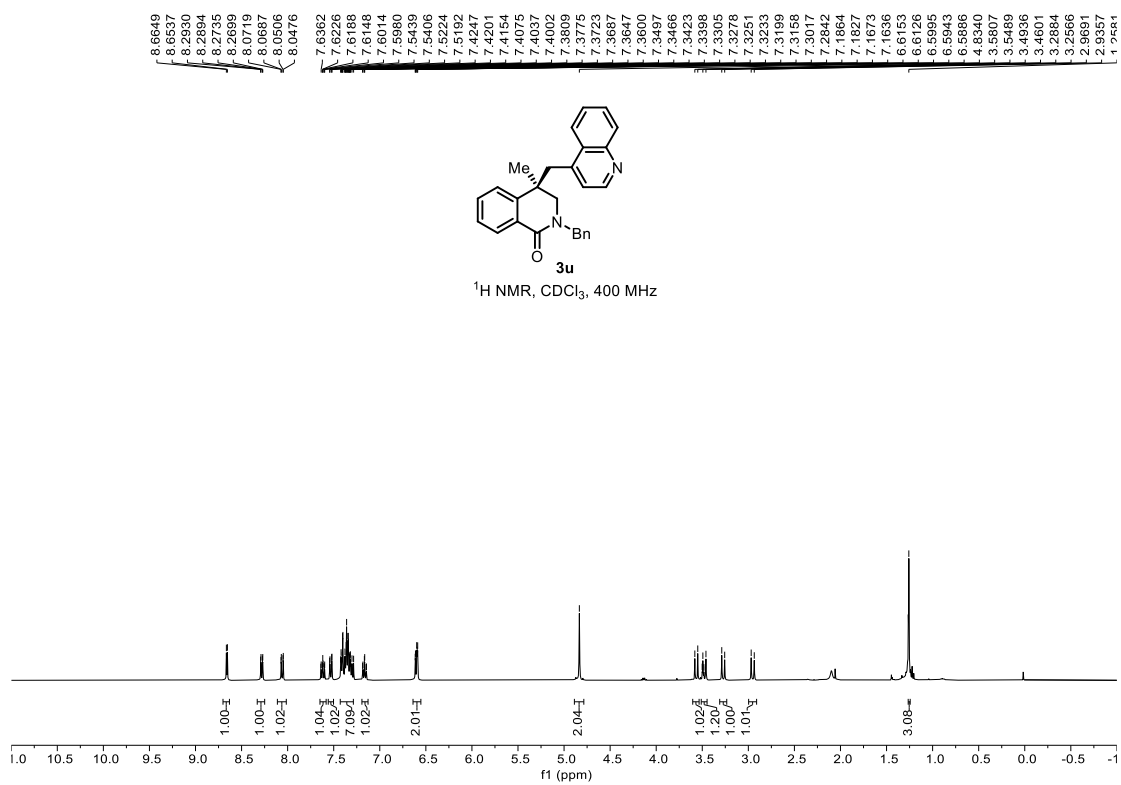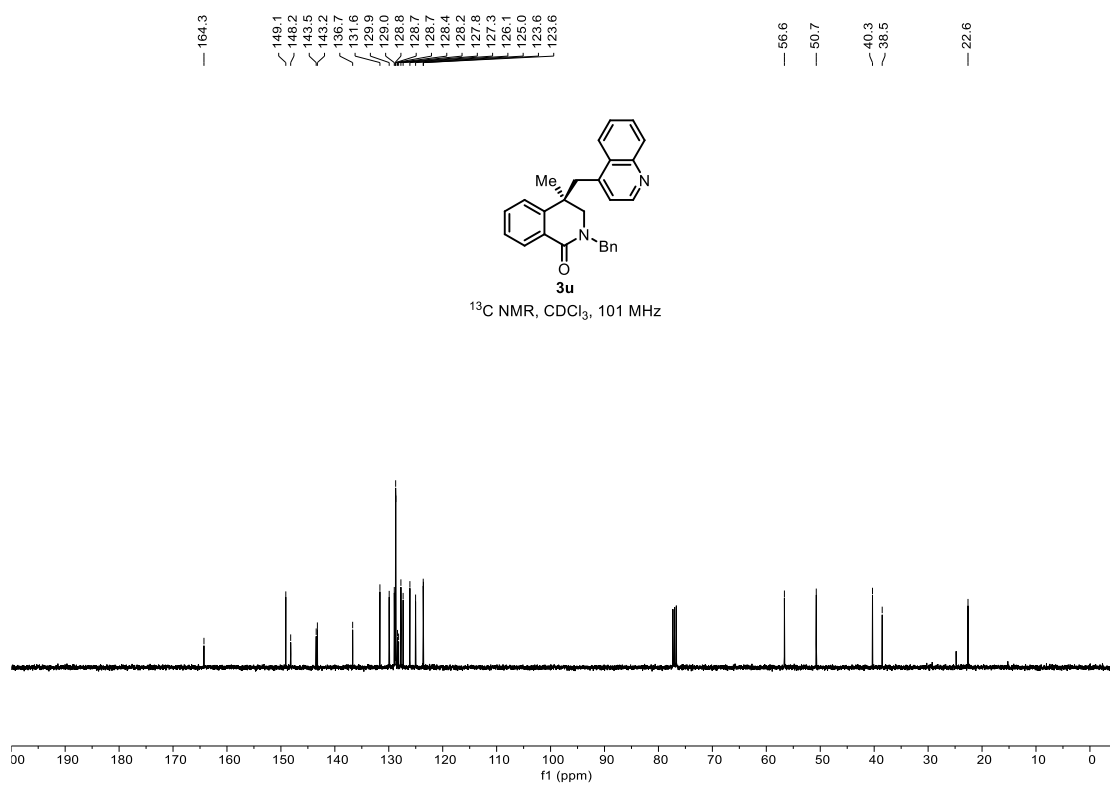

8.2334  
8.2296  
8.2140  
8.2102  
7.5113  
7.5075  
7.4925  
7.4886  
7.4735  
7.4697  
7.3995  
7.3964  
7.3938  
7.3889  
7.3807  
7.3774  
7.3727  
7.3687  
7.3663  
7.3615  
7.3567  
7.3517  
7.3448  
7.3445  
7.3440  
7.3350  
7.3318  
7.3298  
7.3175  
7.3127  
7.3073  
7.3035  
7.2976  
7.2951  
7.2838  
7.2603  
7.2572  
7.2410  
7.2379  
5.4937  
5.4758  
5.4508  
5.0271  
5.0243  
5.0217  
5.0194  
5.0039  
5.0018  
4.8991  
4.8963  
4.8946  
4.9130  
4.9072  
4.9034  
4.8988  
4.8769  
4.8649  
4.8611  
4.8564  
4.7094  
4.6733  
3.3335  
3.3020  
3.2286  
3.1970  
2.2766  
2.2735  
2.2702  
2.2588  
2.2554  
2.2518  
2.2485  
1.2372

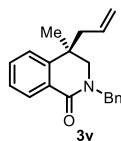

$^1\text{H}$  NMR,  $\text{CDCl}_3$ , 400 MHz

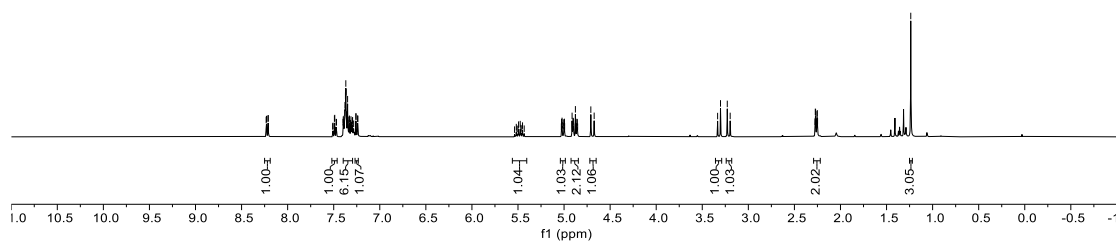

164.2  
145.3  
138.9  
133.2  
131.8  
128.7  
128.5  
125.1  
125.0  
124.8  
124.1  
118.6  
54.9  
50.6  
43.7  
36.8  
22.8

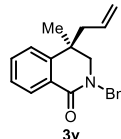

$^{13}\text{C}$  NMR,  $\text{CDCl}_3$ , 101 MHz

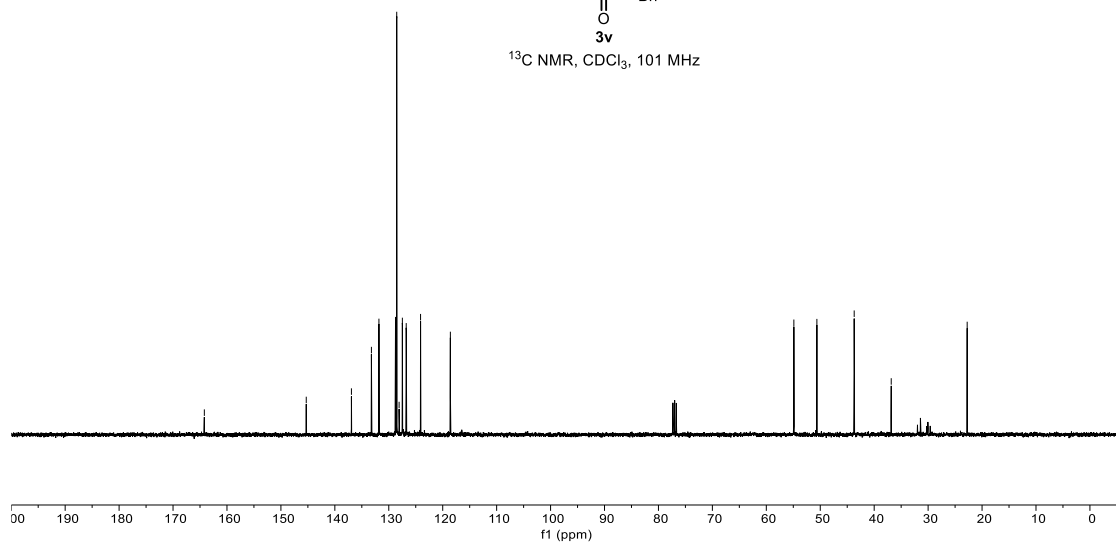

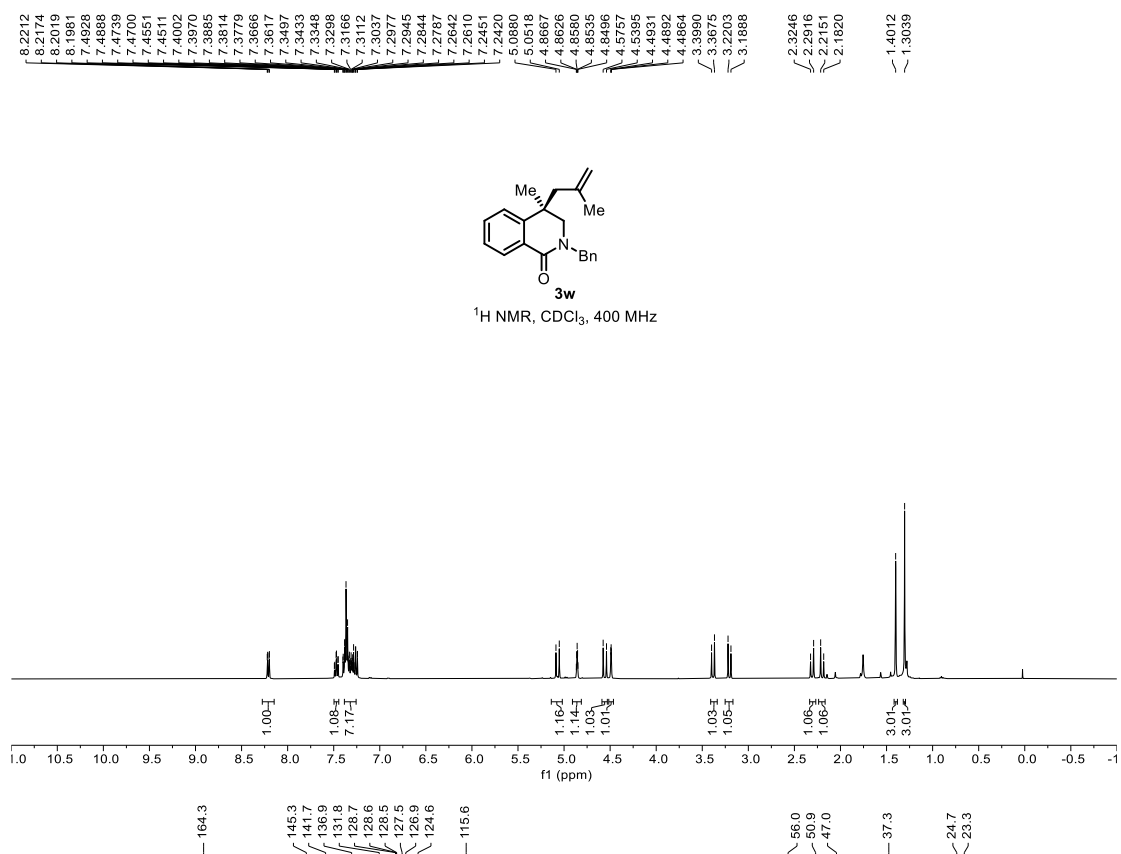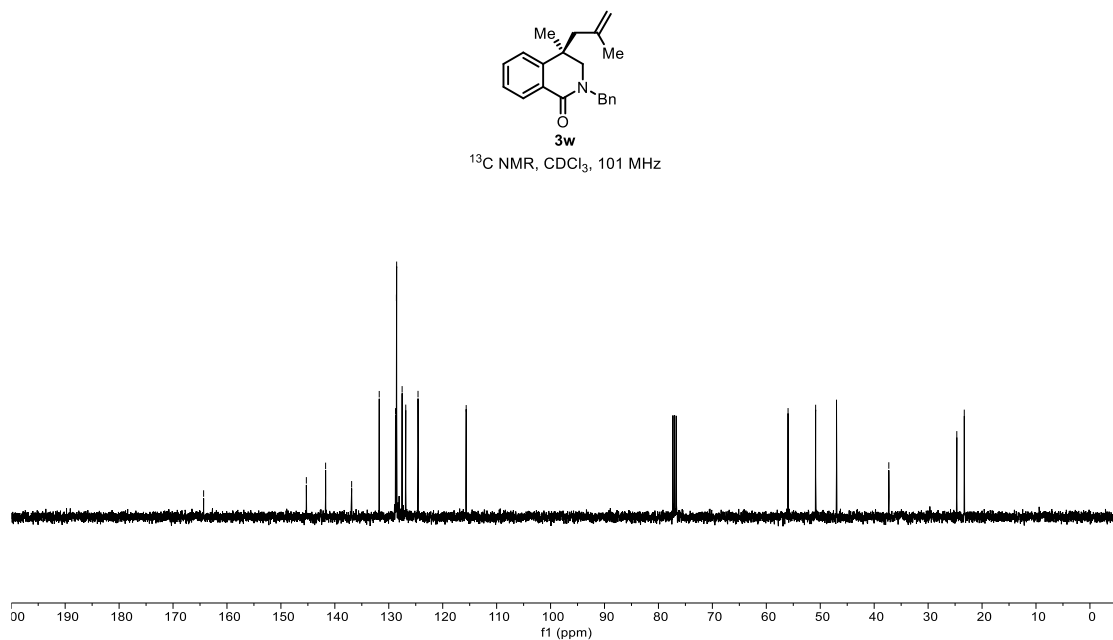



8.2201  
8.2164  
8.2007  
8.1969  
7.5148  
7.5110  
7.4960  
7.4921  
7.4771  
7.4732  
7.4070  
7.4039  
7.3880  
7.3849  
7.3767  
7.3715  
7.3691  
7.3660  
7.3555  
7.3534  
7.3504  
7.3468  
7.3395  
7.3370  
7.3318  
7.3231  
7.3198  
7.3175  
7.3136  
7.3086  
7.3031  
7.2960  
7.2893  
7.2864  
7.2838  
7.2363  
7.2333  
7.2169  
7.2138  
6.6172  
6.5976  
6.5784  
6.5588  
6.5396  
5.6094  
5.6058  
5.6024  
5.5706  
5.5671  
5.5636  
4.8944  
4.8103  
4.7285  
4.6925  
4.1878  
4.1701  
4.1523  
4.1345  
3.3704  
3.3385  
3.1948  
3.1629  
2.3576  
2.3537  
2.3502  
2.3387  
2.3342  
2.3302  
1.2959  
1.2885  
1.2782  
1.2633

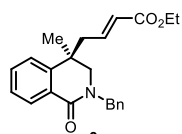

$^1\text{H}$  NMR,  $\text{CDCl}_3$ , 400 MHz

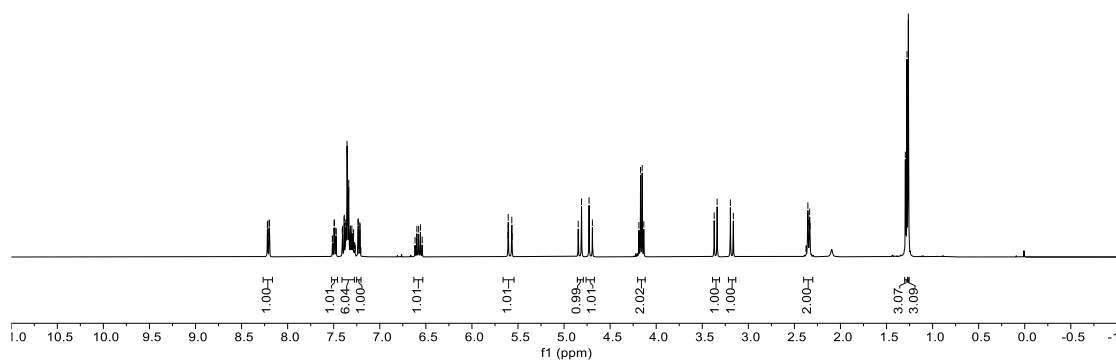

165.8  
164.0  
144.4  
143.2  
136.7  
132.1  
128.9  
128.6  
128.5  
128.0  
127.6  
127.1  
124.7  
123.9  
60.2  
54.9  
50.5  
41.7  
37.1  
22.7  
14.1

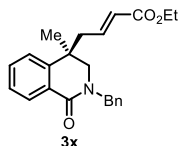

$^{13}\text{C}$  NMR,  $\text{CDCl}_3$ , 101 MHz

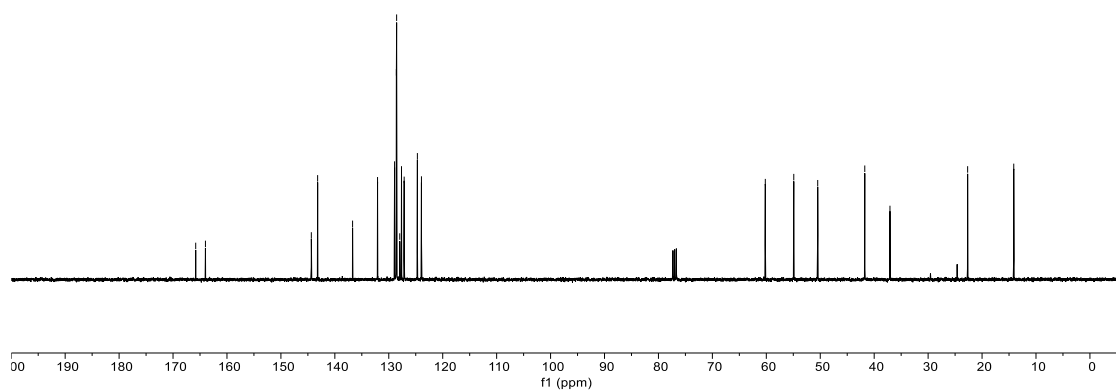

8.2904  
8.2865  
8.2710  
8.2673  
7.5472  
7.5434  
7.5284  
7.5245  
7.5095  
7.5056  
7.4433  
7.4402  
7.4323  
7.4275  
7.4244  
7.4212  
7.4151  
7.4111  
7.4089  
7.4023  
7.3989  
7.3959  
7.3871  
7.3844  
7.3821  
7.3772  
7.3672  
7.3633  
7.3582  
7.3534  
7.3488  
7.3436  
7.3404  
7.3368  
7.3318  
7.3248  
7.3220  
7.3188  
7.3146  
7.3040  
7.2856  
7.2629  
7.2608  
7.2545  
7.2512  
7.2458  
7.2437  
7.2381  
7.2340  
7.2306  
7.2266  
6.2379  
6.1985  
5.8247  
5.8051  
5.7855  
4.9048  
4.8688  
4.7846  
4.7486  
3.4088  
3.3772  
3.2846  
3.2530  
2.4114  
2.4082  
2.4059  
2.4027  
2.3923  
2.3879  
2.3836  
1.3052

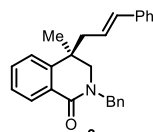

$^1\text{H}$  NMR,  $\text{CDCl}_3$ , 400 MHz

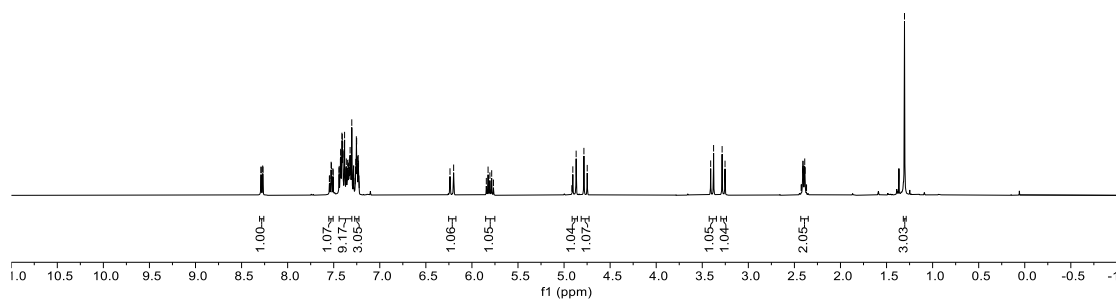

164.2  
145.3  
137.0  
133.5  
131.9  
128.8  
128.6  
128.6  
128.4  
128.1  
127.6  
127.2  
126.9  
126.0  
124.8  
124.1  
54.8  
50.5  
42.9  
37.4  
22.6

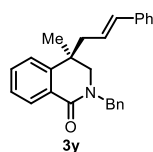

$^{13}\text{C}$  NMR,  $\text{CDCl}_3$ , 101 MHz

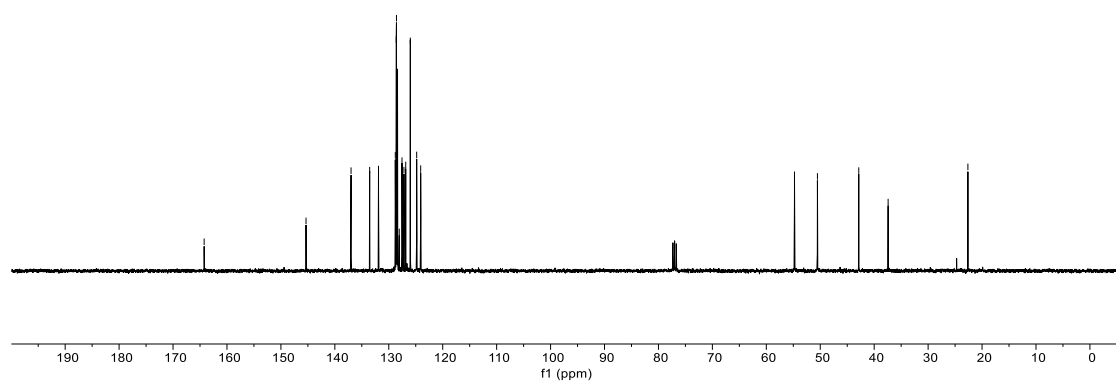

8.2206  
8.2167  
8.2014  
8.1975  
7.4819  
7.4780  
7.4631  
7.4591  
7.4443  
7.4402  
7.3875  
7.3842  
7.3815  
7.3768  
7.3689  
7.3656  
7.3620  
7.3468  
7.3403  
7.3314  
7.3270  
7.3117  
7.3065  
7.3027  
7.2953  
7.2901  
7.2829  
7.2782  
7.2734  
7.2477  
7.2446  
7.2284  
7.2252  
5.1708  
5.1656  
5.1602  
5.0576  
5.0215  
4.5906  
4.5544  
3.3434  
3.3119  
3.2472  
3.2157  
2.3408  
2.2575  
2.2486  
2.2427  
2.2381  
2.2360  
2.2329  
2.2283  
2.2206  
2.2129  
1.9732  
1.9557  
1.7939  
1.7824  
1.7738  
1.7672  
1.7566  
1.7515  
1.7480  
1.7370  
1.7368  
1.7281  
1.7168  
1.7164  
1.7115  
1.7083  
1.7043  
1.2595

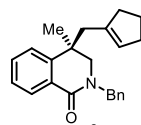

**3z**  
 $^1\text{H}$  NMR,  $\text{CDCl}_3$ , 400 MHz

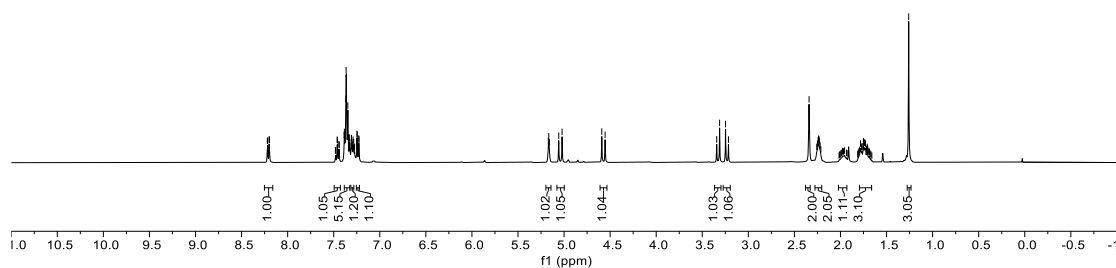

164.4  
145.7  
140.2  
137.0  
131.7  
128.7  
128.6  
128.1  
127.5  
126.8  
124.4

55.7  
50.9  
40.6  
37.3  
37.1  
32.5  
24.0  
23.8

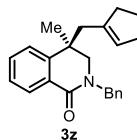

**3z**  
 $^{13}\text{C}$  NMR,  $\text{CDCl}_3$ , 101 MHz

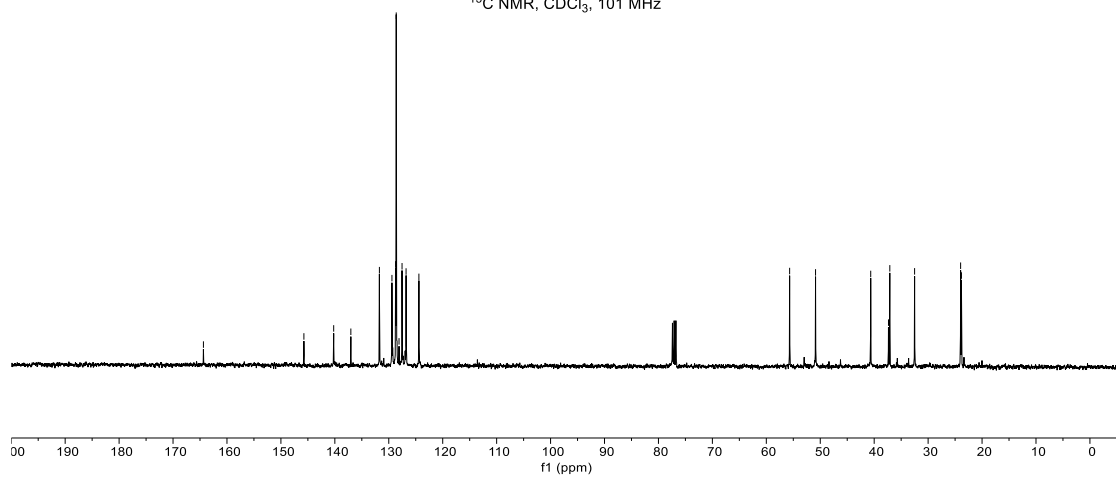

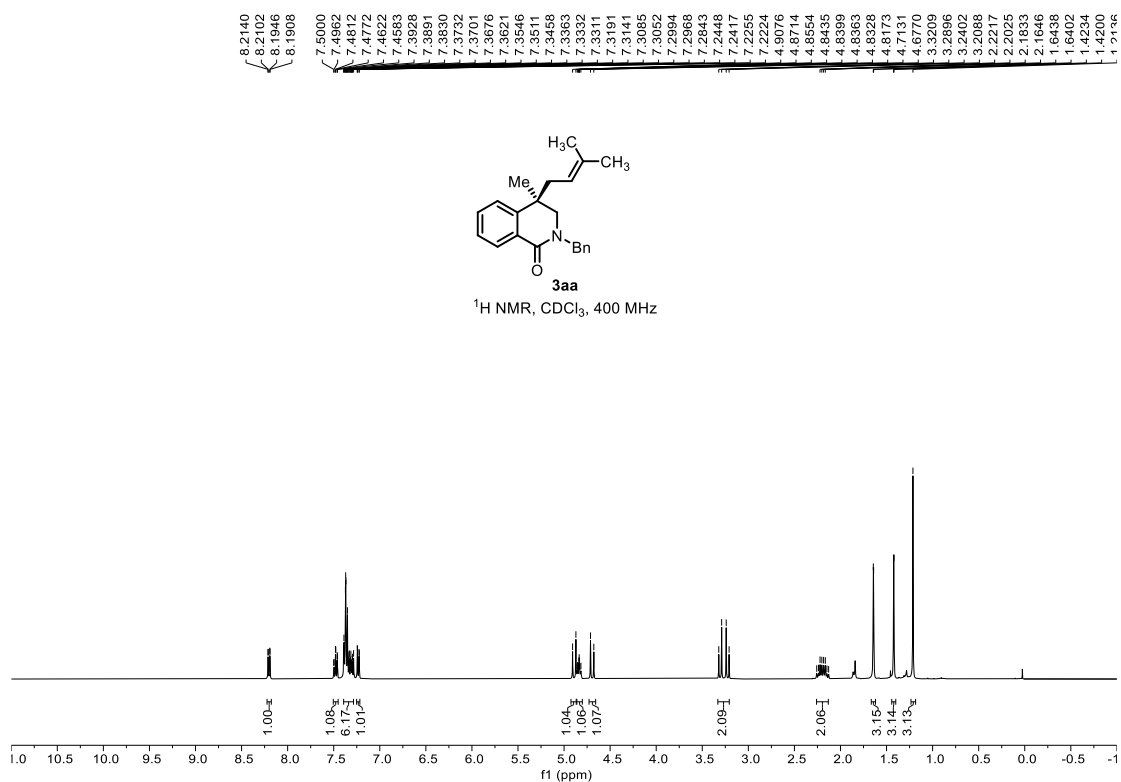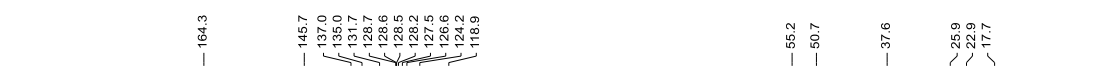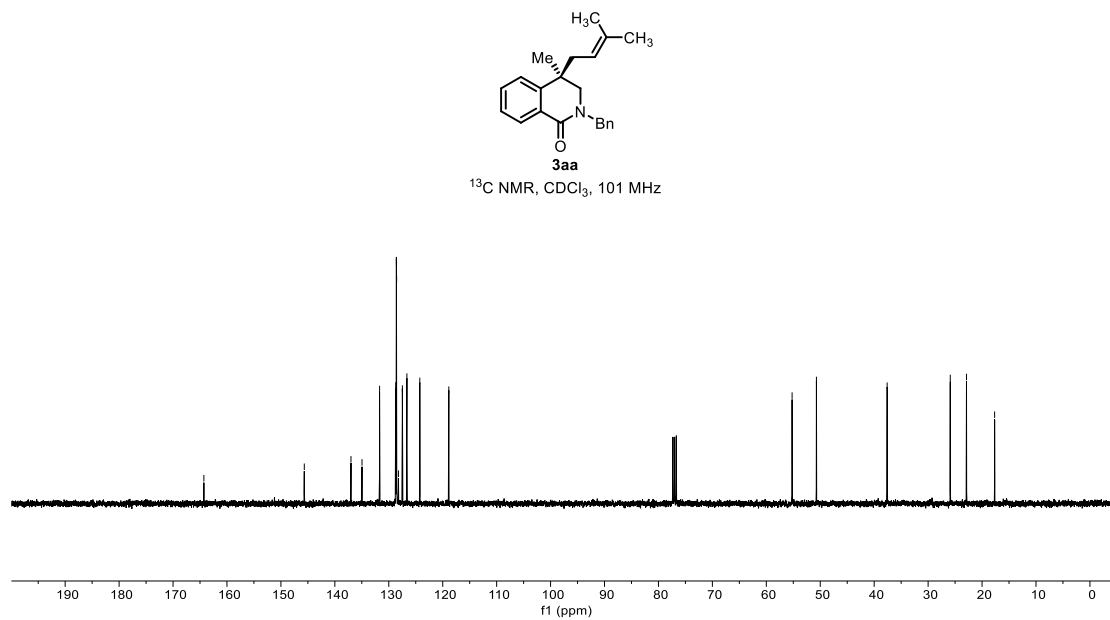

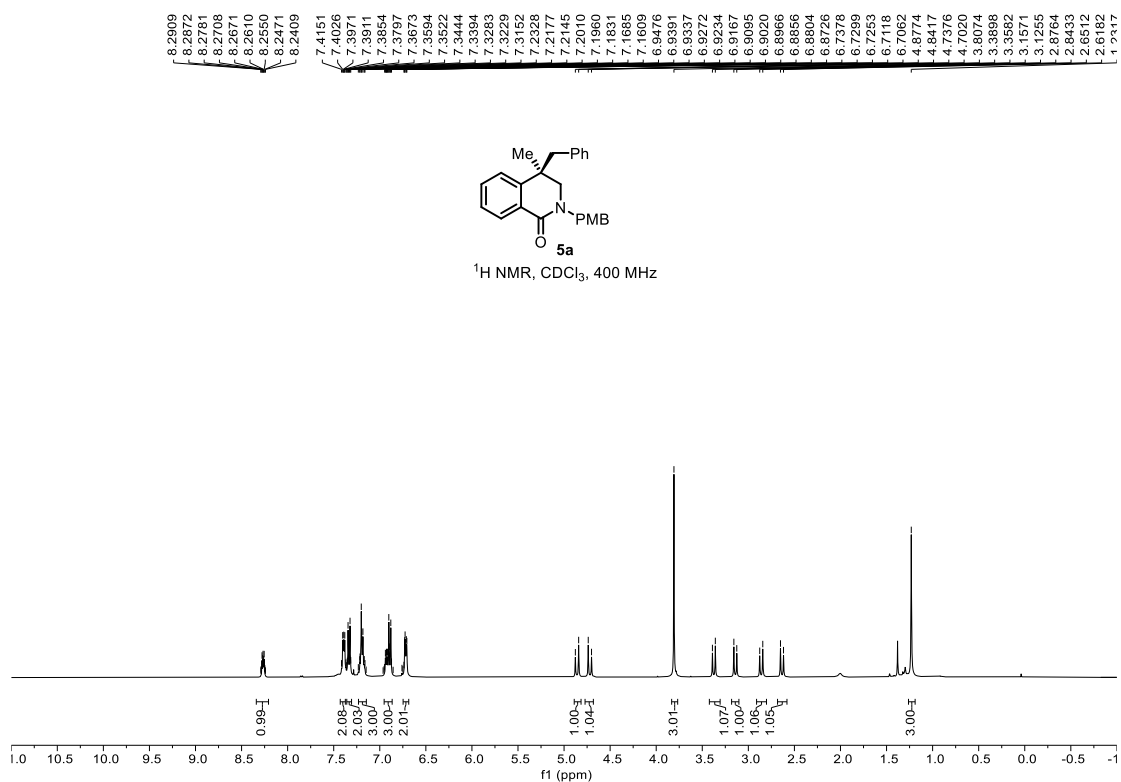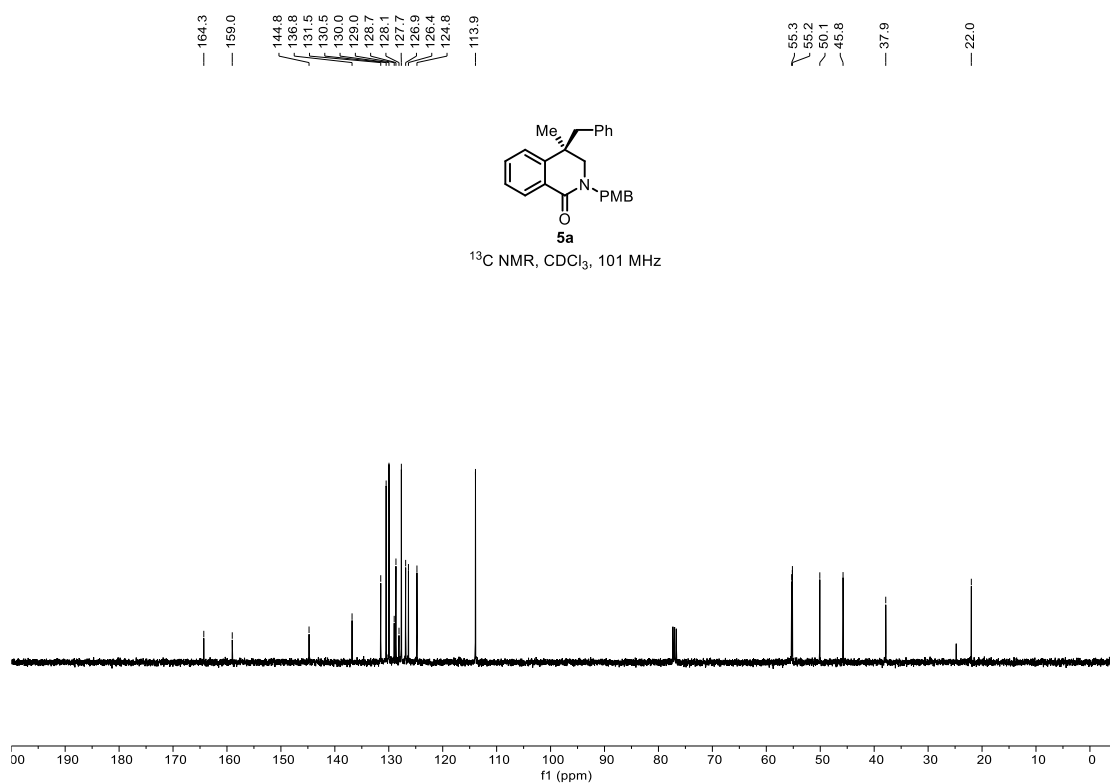

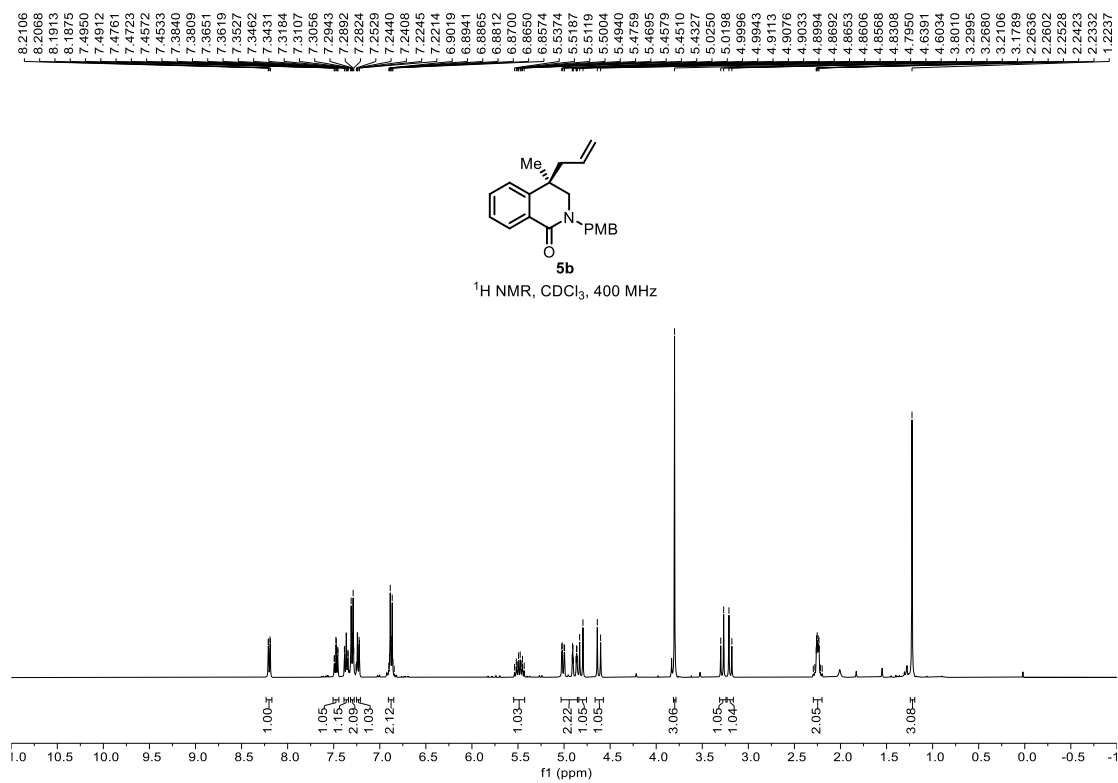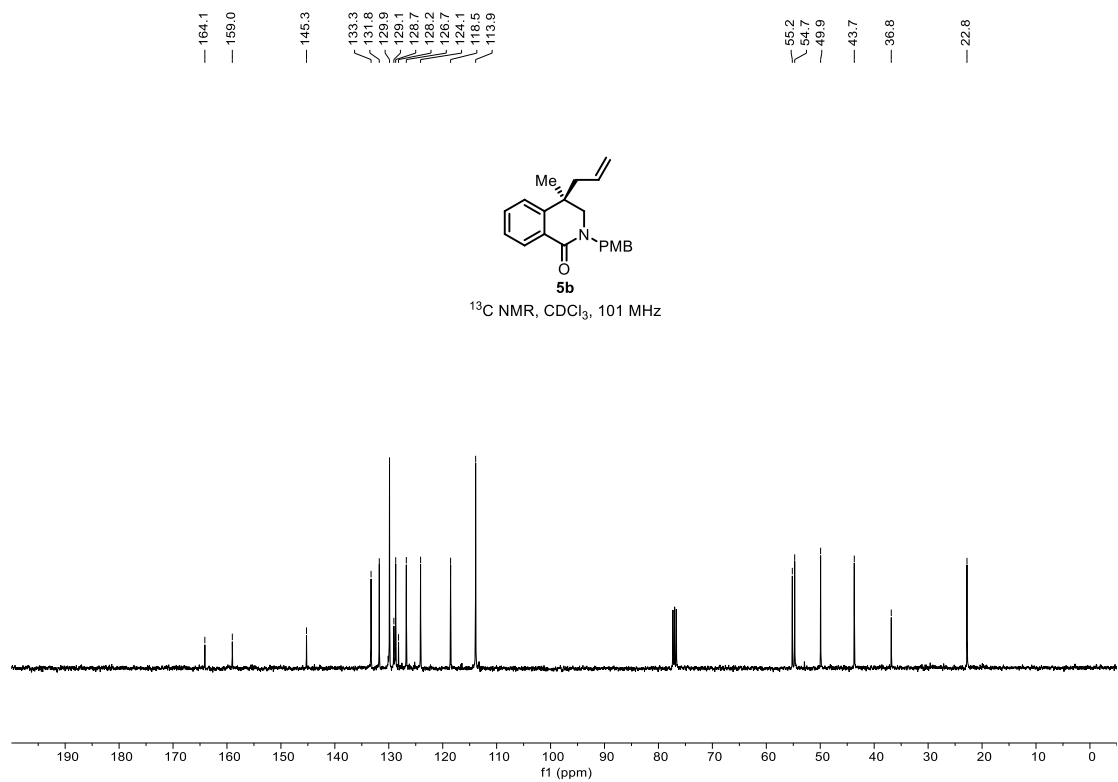

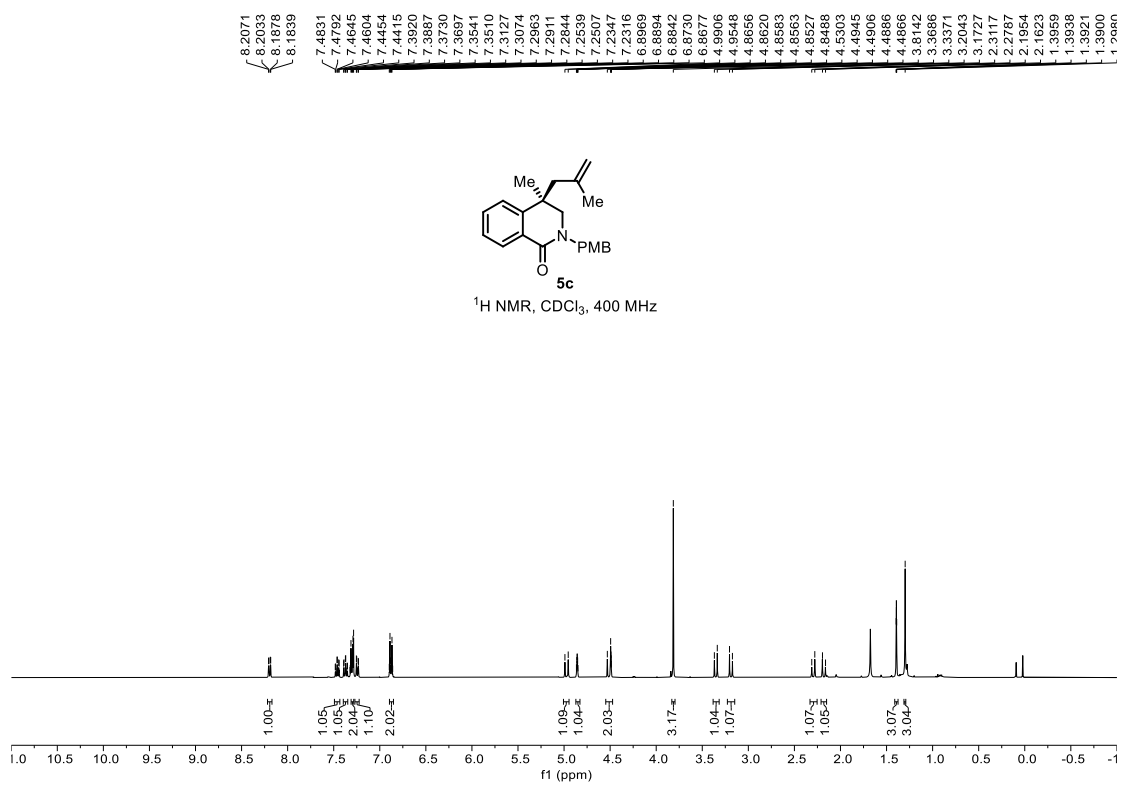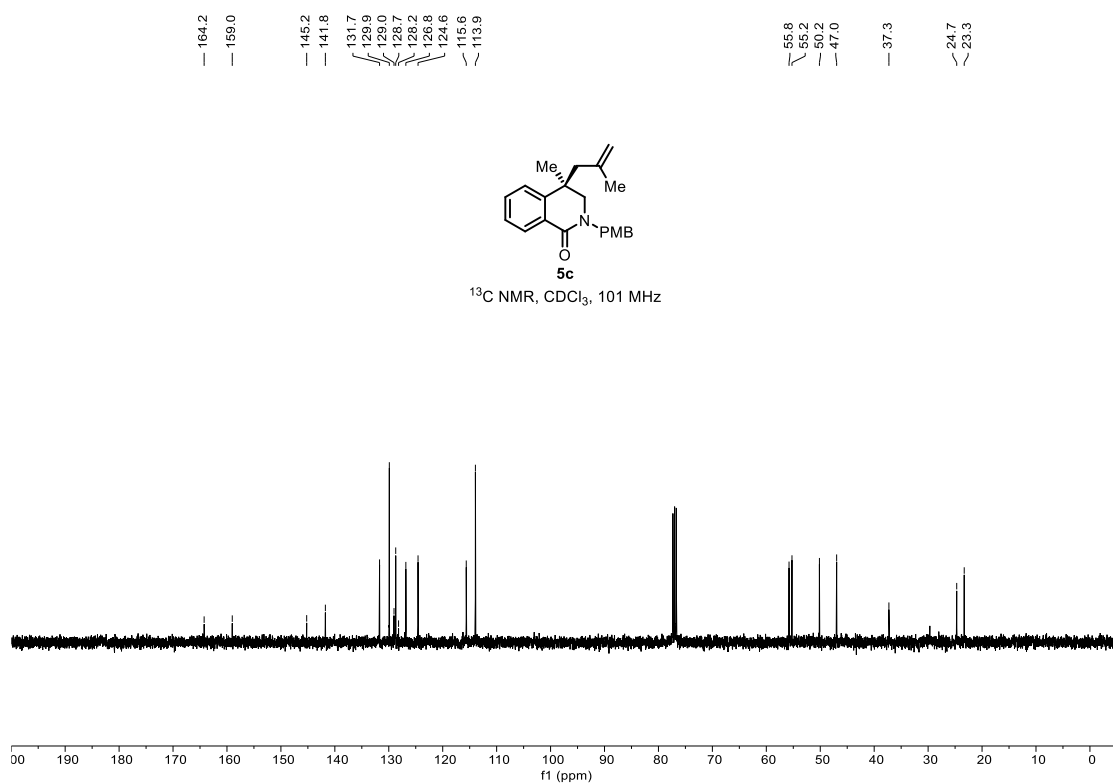

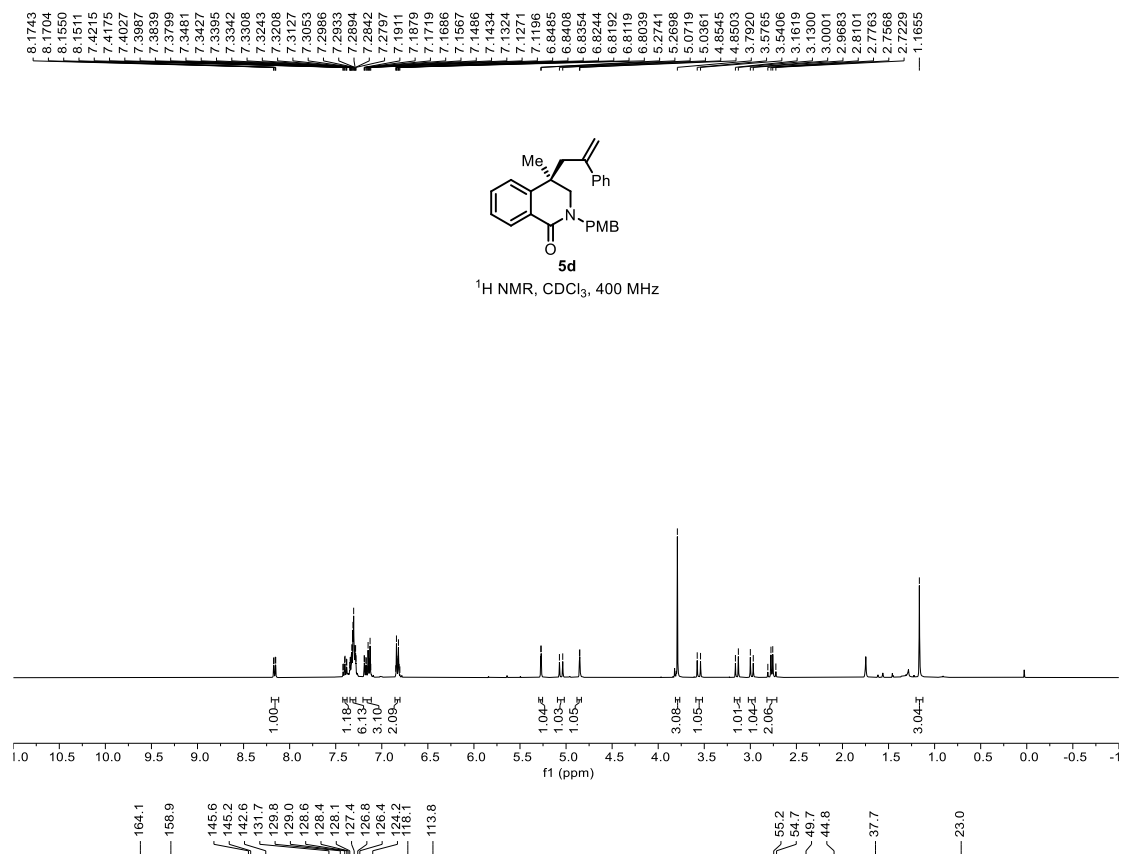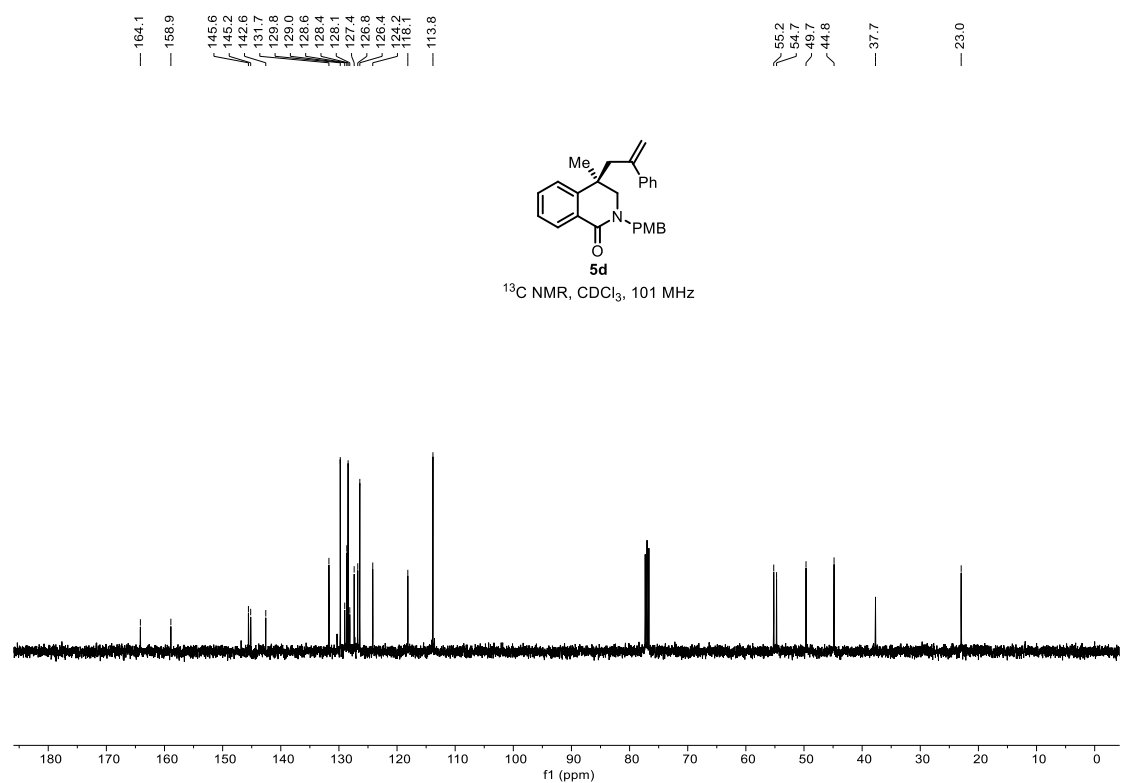



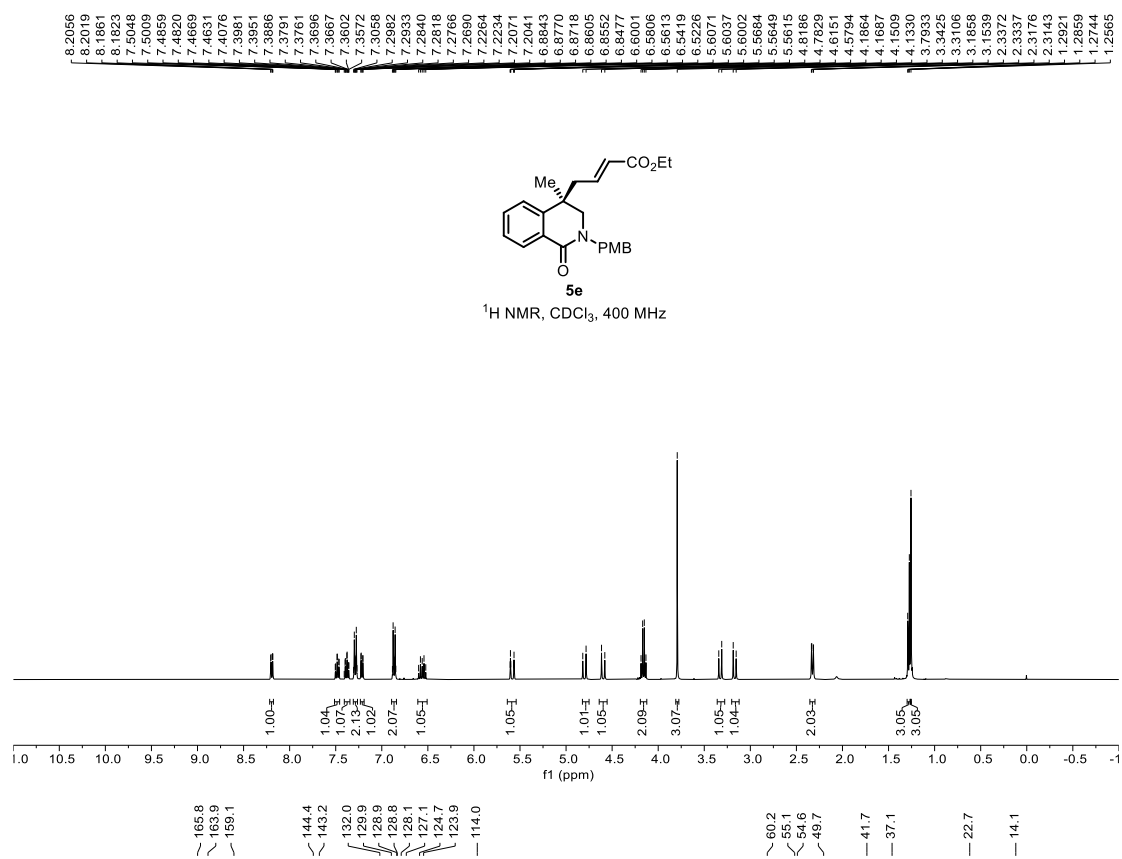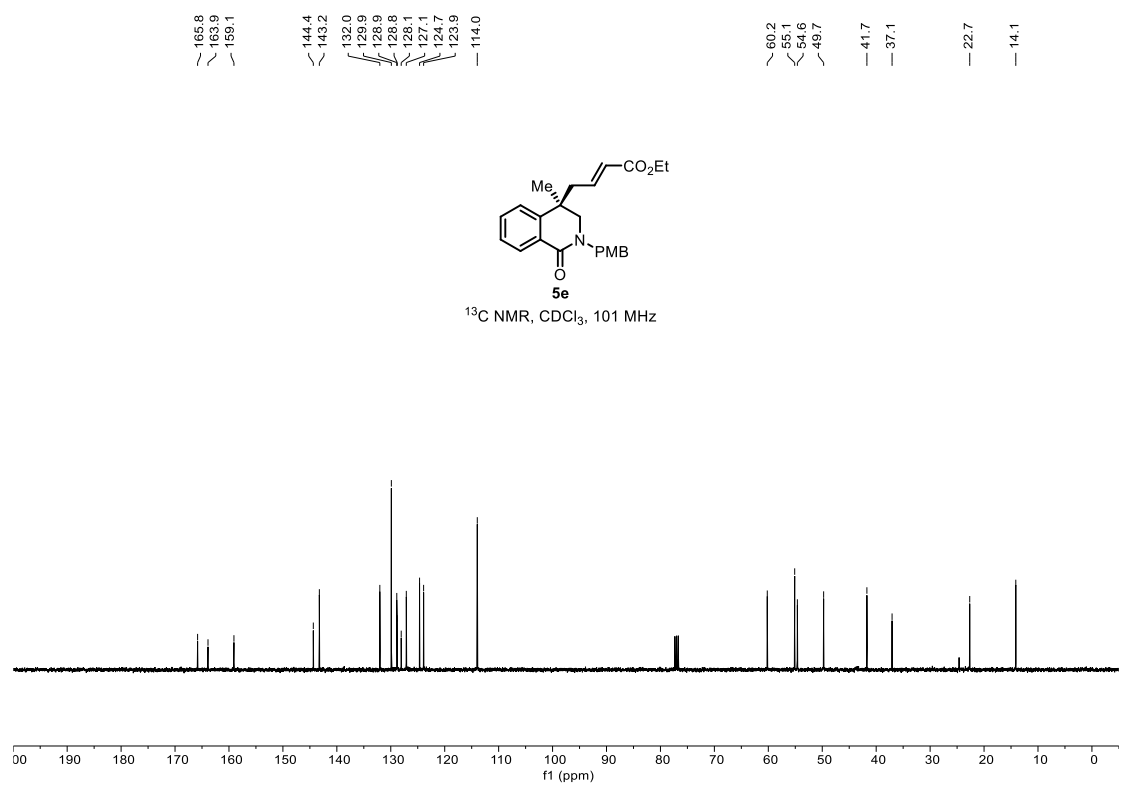

8.2019  
8.1981  
8.1826  
8.1788  
7.4705  
7.4667  
7.4517  
7.4479  
7.4329  
7.4290  
7.3773  
7.3743  
7.3584  
7.3553  
7.3396  
7.3366  
7.3170  
7.3090  
7.3039  
7.2930  
7.2874  
7.2347  
7.2335  
7.2165  
7.2122  
6.8944  
6.8867  
6.8816  
6.8703  
6.8652  
5.1707  
5.1638  
4.9604  
4.9247  
4.5415  
4.5058  
3.8057  
3.3133  
3.2820  
3.2293  
3.1978  
3.2006  
2.2552  
2.2497  
2.2358  
2.2215  
2.2166  
2.2112  
1.9892  
1.9860  
1.9473  
1.9410  
1.9287  
1.7872  
1.7818  
1.7725  
1.7691  
1.7608  
1.7574  
1.7530  
1.7450  
1.7352  
1.7311  
1.7270  
1.7242  
1.7211  
1.7152  
1.7113  
1.7051  
1.7017  
1.2503

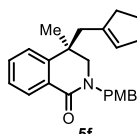

$^1\text{H NMR}$ ,  $\text{CDCl}_3$ , 400 MHz

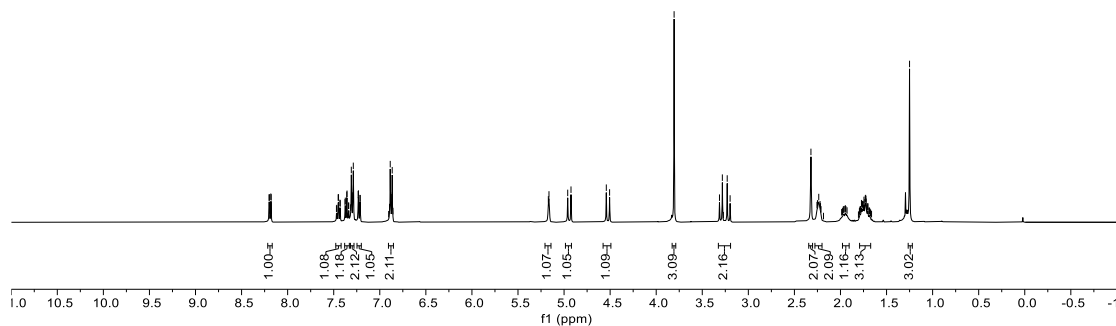

164.2  
159.0  
145.6  
140.1  
131.6  
129.9  
129.3  
128.0  
126.6  
126.1  
126.7  
124.3  
113.9  
55.4  
55.2  
50.1  
40.5  
37.2  
37.0  
32.4  
23.9  
23.7

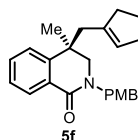

$^{13}\text{C NMR}$ ,  $\text{CDCl}_3$ , 101 MHz

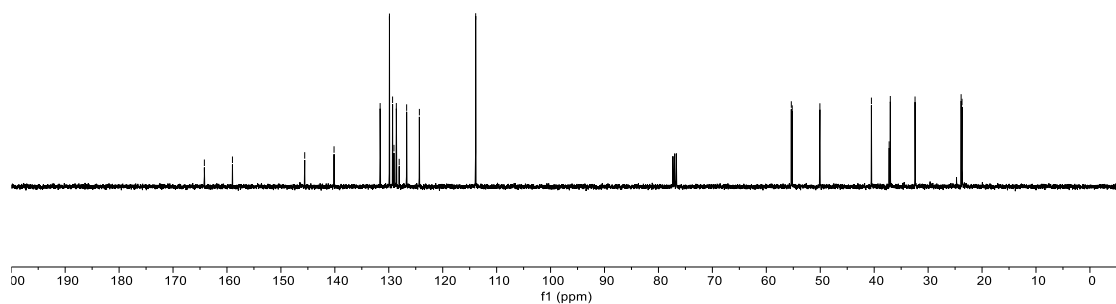

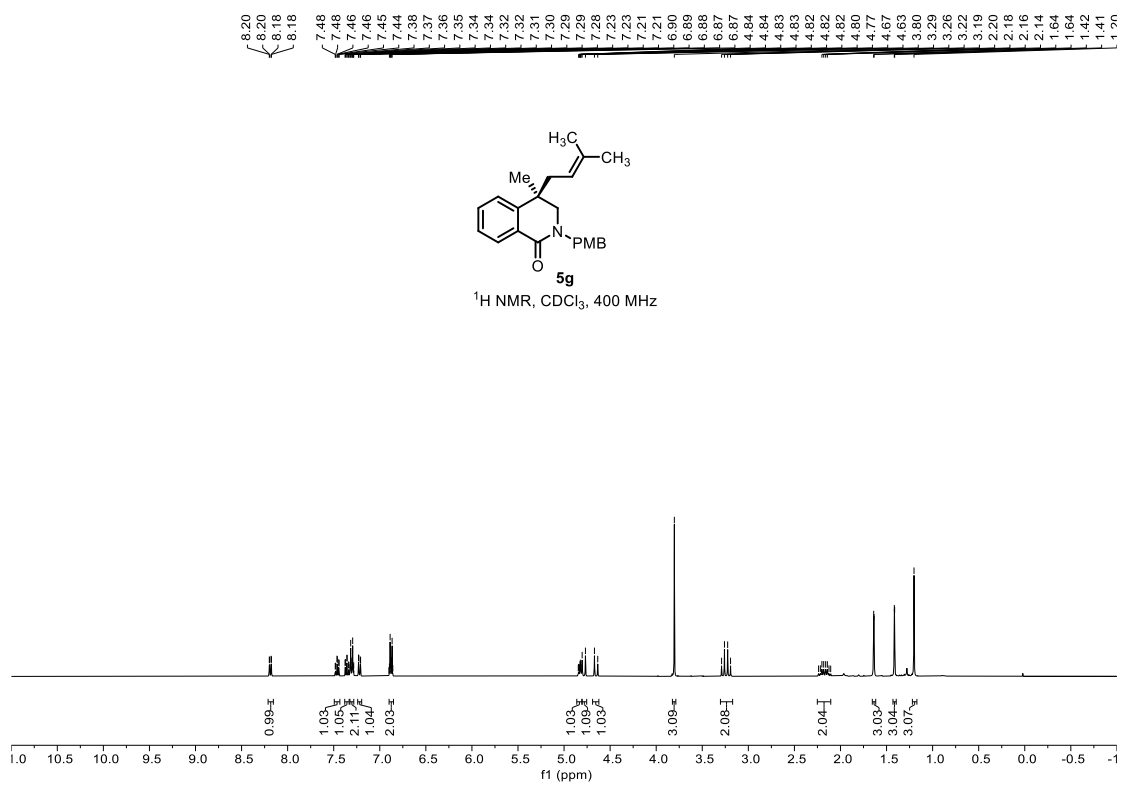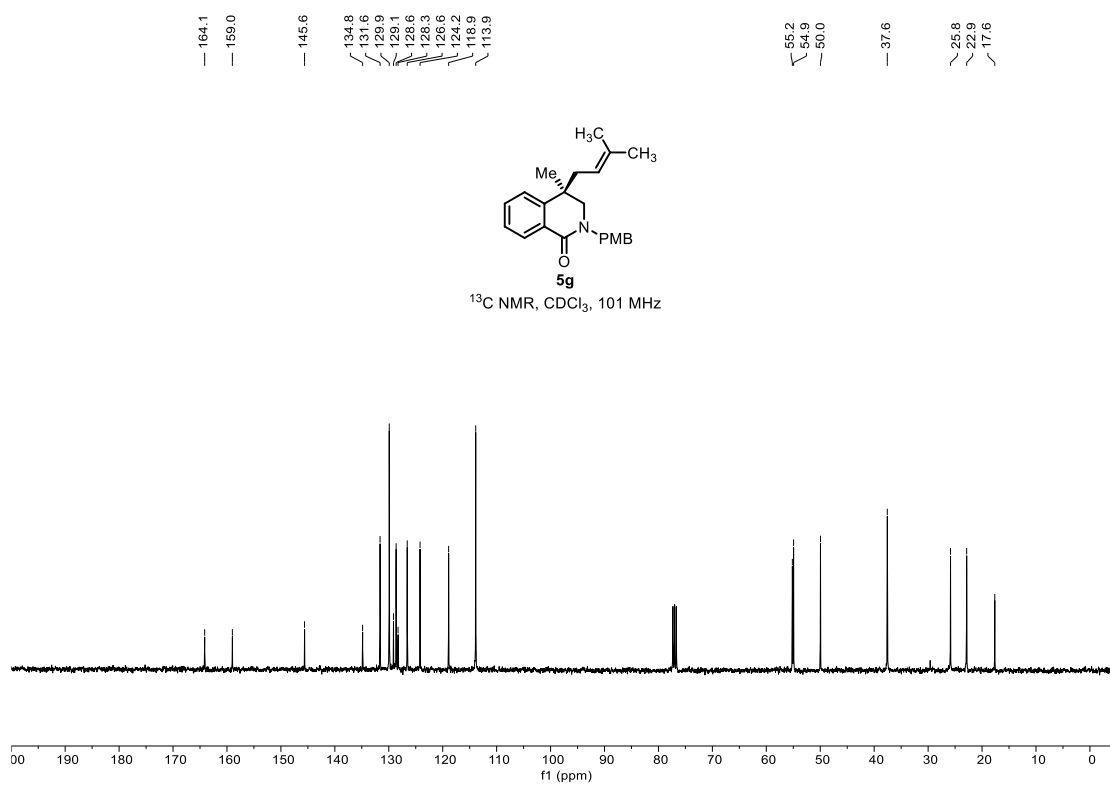

8.2702  
8.2664  
8.2508  
8.2469  
7.5337  
7.5298  
7.5149  
7.5110  
7.4959  
7.4921  
7.4363  
7.4293  
7.4262  
7.4103  
7.4072  
7.3915  
7.3884  
7.3669  
7.3598  
7.3519  
7.3468  
7.3355  
7.3344  
7.3184  
7.3145  
7.3116  
7.3039  
7.2956  
7.2914  
7.2838  
7.2583  
7.2548  
7.2517  
7.2395  
7.2341  
7.2253  
7.2204  
7.2181  
6.9236  
6.9160  
6.9109  
6.8997  
6.8945  
6.8863  
6.2163  
6.1770  
5.7940  
5.7780  
5.5555  
5.5377  
5.7168  
4.9260  
4.8903  
4.6139  
4.5782  
3.7924  
3.3709  
3.3394  
3.2691  
3.2374  
2.4048  
2.4018  
2.3896  
2.3865  
2.3705  
2.3675  
2.3627  
2.3593  
2.3439  
2.3407  
2.3282  
1.2941

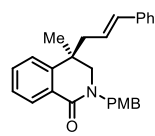

**5h**  
 $^1\text{H}$  NMR,  $\text{CDCl}_3$ , 400 MHz

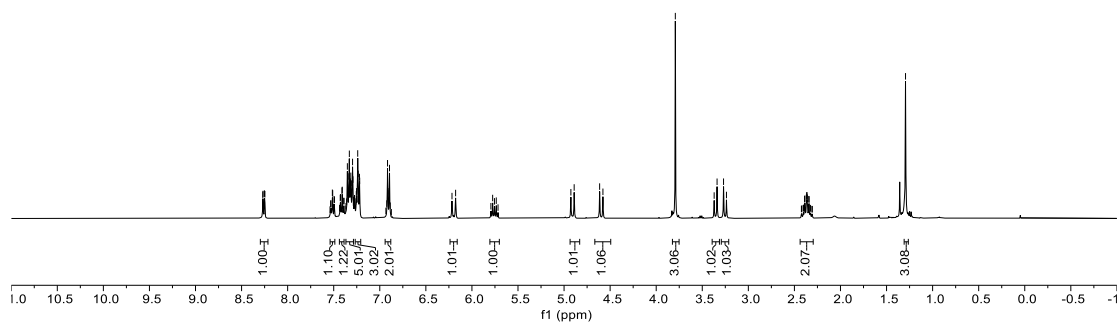

164.1  
159.0  
145.4  
137.0  
133.5  
131.9  
130.0  
128.1  
128.7  
128.4  
128.1  
127.2  
126.8  
126.0  
124.8  
124.0  
114.0  
113.9  
55.1  
54.3  
49.7  
42.8  
37.4  
22.5

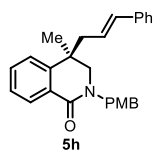

**5h**  
 $^{13}\text{C}$  NMR,  $\text{CDCl}_3$ , 101 MHz

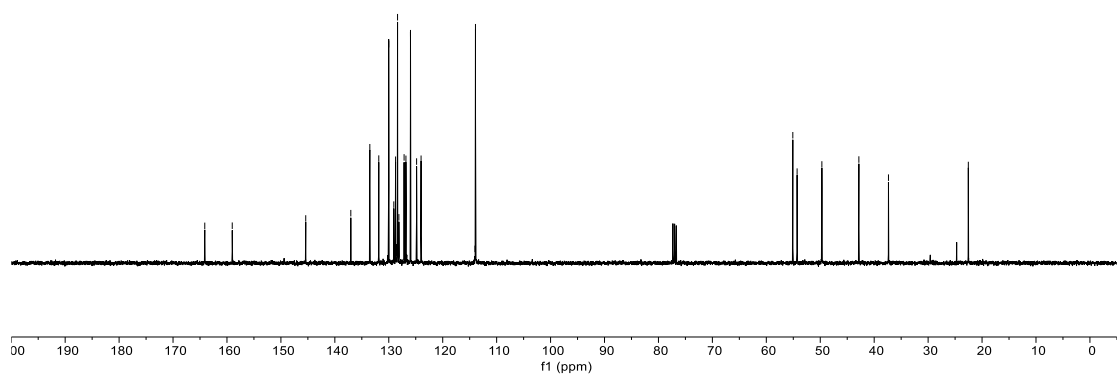

8.2916  
8.2853  
8.2830  
8.2784  
8.2734  
8.2684  
7.4444  
7.4381  
7.4296  
7.4266  
7.4229  
7.4183  
7.4086  
7.4011  
7.3959  
7.3911  
7.3815  
7.3738  
7.3709  
7.3680  
7.3655  
7.3591  
7.3565  
7.3541  
7.3494  
7.3398  
7.3365  
7.3346  
7.3233  
7.3186  
7.1932  
7.1910  
7.1847  
7.1799  
7.1759  
7.1713  
7.1671  
7.1601  
7.1574  
7.1531  
7.1379  
7.1313  
6.8557  
6.8514  
6.8463  
6.8412  
6.8389  
6.8332  
6.8271  
6.8224  
6.8194  
6.6723  
6.6721  
6.6674  
4.8180  
4.8154  
3.5129  
3.4815  
3.2076  
3.1760  
2.9647  
2.9313  
2.6822  
2.6488  
1.8046  
1.7867  
1.7685  
1.7497  
1.7441  
0.8408  
0.8223  
0.8035

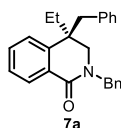

$^1\text{H}$  NMR,  $\text{CDCl}_3$ , 400 MHz

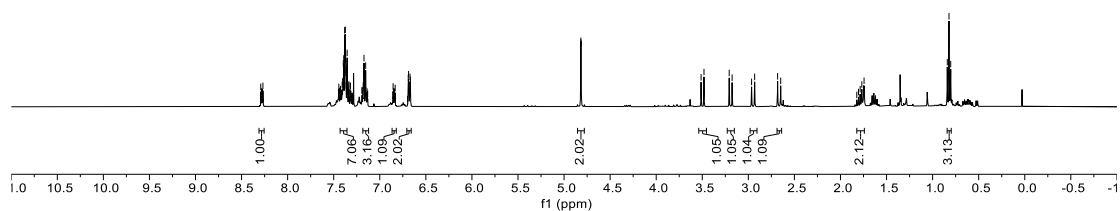

164.1  
142.8  
136.9  
136.7  
131.2  
130.6  
128.9  
128.6  
127.7  
127.6  
127.0  
126.8  
126.4  
125.7  
53.3  
51.0  
44.0  
41.0  
26.8  
8.3

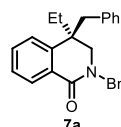

$^{13}\text{C}$  NMR,  $\text{CDCl}_3$ , 101 MHz

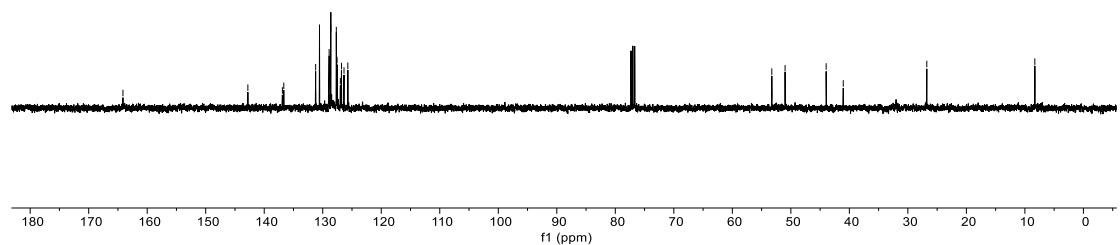

8.2838  
8.2776  
8.2754  
8.2704  
8.2655  
8.2606  
7.3949  
7.3912  
7.3866  
7.3773  
7.3735  
7.3689  
7.3633  
7.3560  
7.3536  
7.3511  
7.3460  
7.3369  
7.3337  
7.3316  
7.3215  
7.3165  
7.3110  
7.3079  
7.3017  
7.2991  
7.2904  
7.1979  
7.1873  
7.1830  
7.1805  
7.1783  
7.1757  
7.1695  
7.1665  
7.1620  
7.1470  
6.8582  
6.8539  
6.8489  
6.8435  
6.8412  
6.8355  
6.6911  
6.6873  
6.6831  
6.6775  
6.6723  
4.8674  
4.8377  
4.8091  
3.5065  
3.4749  
3.2226  
3.1911  
2.9743  
2.9410  
2.6833  
2.6499  
1.6667  
1.6369  
1.6248  
1.5841  
1.5554  
1.2342  
1.2288  
1.2165  
1.2105  
1.1993  
0.8938  
0.8757  
0.8575

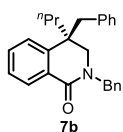

$^1\text{H}$  NMR,  $\text{CDCl}_3$ , 400 MHz

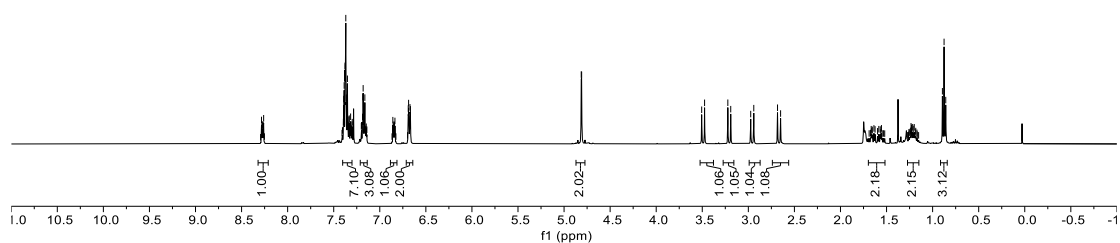

164.2  
143.3  
138.9  
136.7  
131.3  
130.6  
128.9  
128.7  
128.7  
127.8  
127.6  
126.8  
126.4  
125.6  
53.8  
51.0  
44.2  
41.1  
36.7  
17.1  
14.6

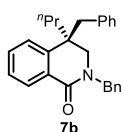

$^{13}\text{C}$  NMR,  $\text{CDCl}_3$ , 101 MHz

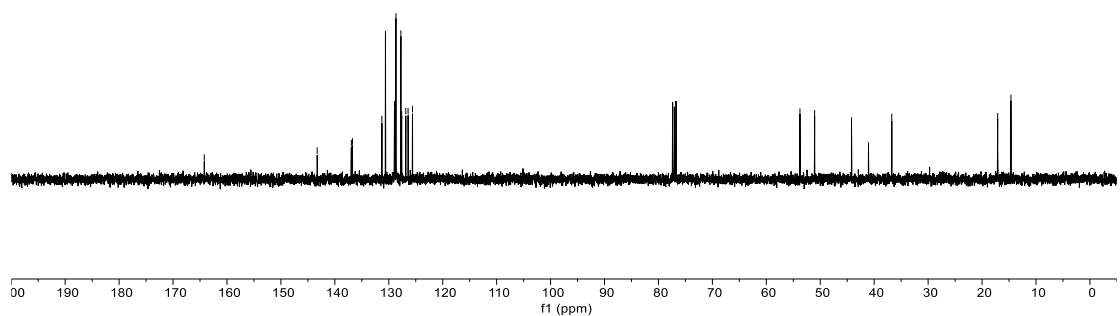

8.30  
8.29  
8.28  
8.28  
8.27  
8.27  
7.42  
7.41  
7.41  
7.40  
7.39  
7.38  
7.37  
7.36  
7.34  
7.33  
7.32  
7.32  
7.31  
7.20  
7.18  
7.16  
7.15  
7.14  
6.87  
6.86  
6.86  
6.85  
6.85  
6.85  
6.70  
6.70  
6.68  
6.68  
4.87  
4.83  
4.81  
4.77  
3.52  
3.49  
3.23  
3.20  
2.99  
2.99  
2.95  
2.70  
2.66  
2.66  
1.70  
1.69  
1.69  
1.67  
1.66  
1.65  
1.61  
1.59  
1.58  
1.30  
1.30  
1.29  
1.27  
1.25  
1.25  
1.24  
1.23  
1.21  
1.20  
1.19  
1.18  
1.16  
1.16  
1.15  
1.14  
0.89  
0.87  
0.85

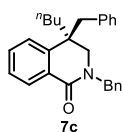

$^1\text{H}$  NMR,  $\text{CDCl}_3$ , 400 MHz

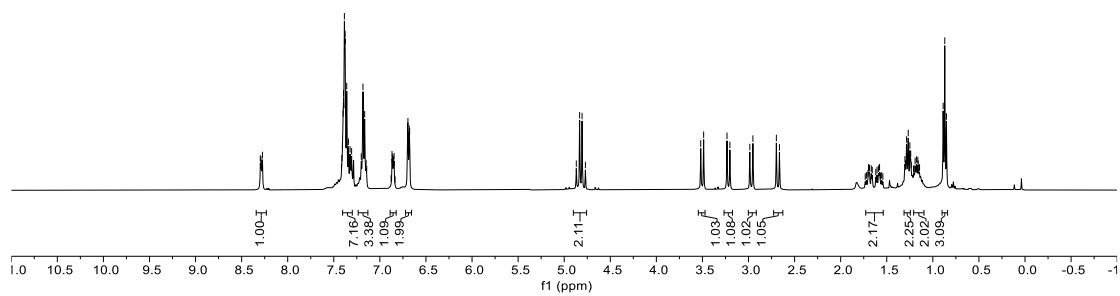

164.1

143.2

136.7

130.5

128.7

128.6

127.7

127.5

126.8

125.6

53.7

51.0

44.1

40.9

34.2

25.9

23.3

13.9

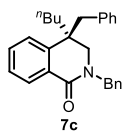

$^{13}\text{C}$  NMR,  $\text{CDCl}_3$ , 101 MHz

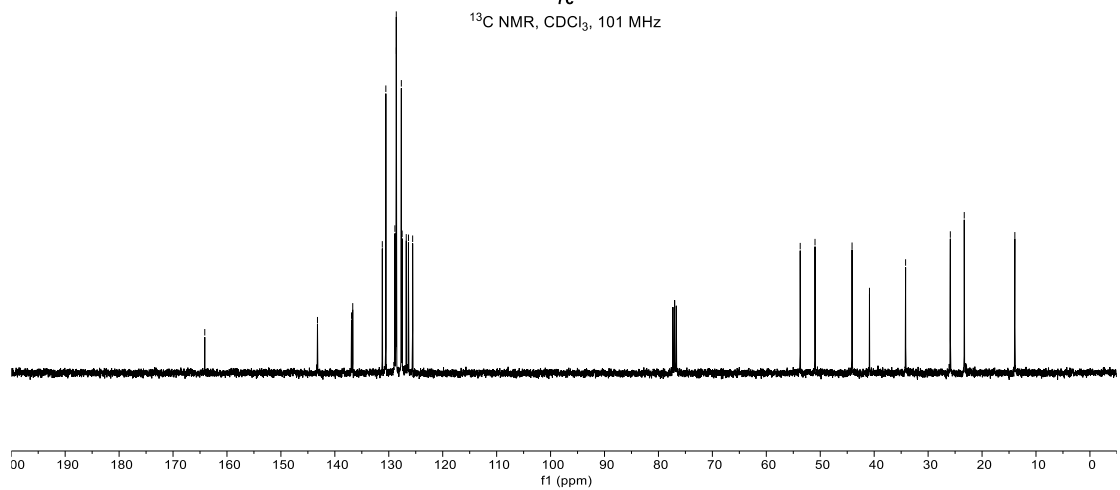

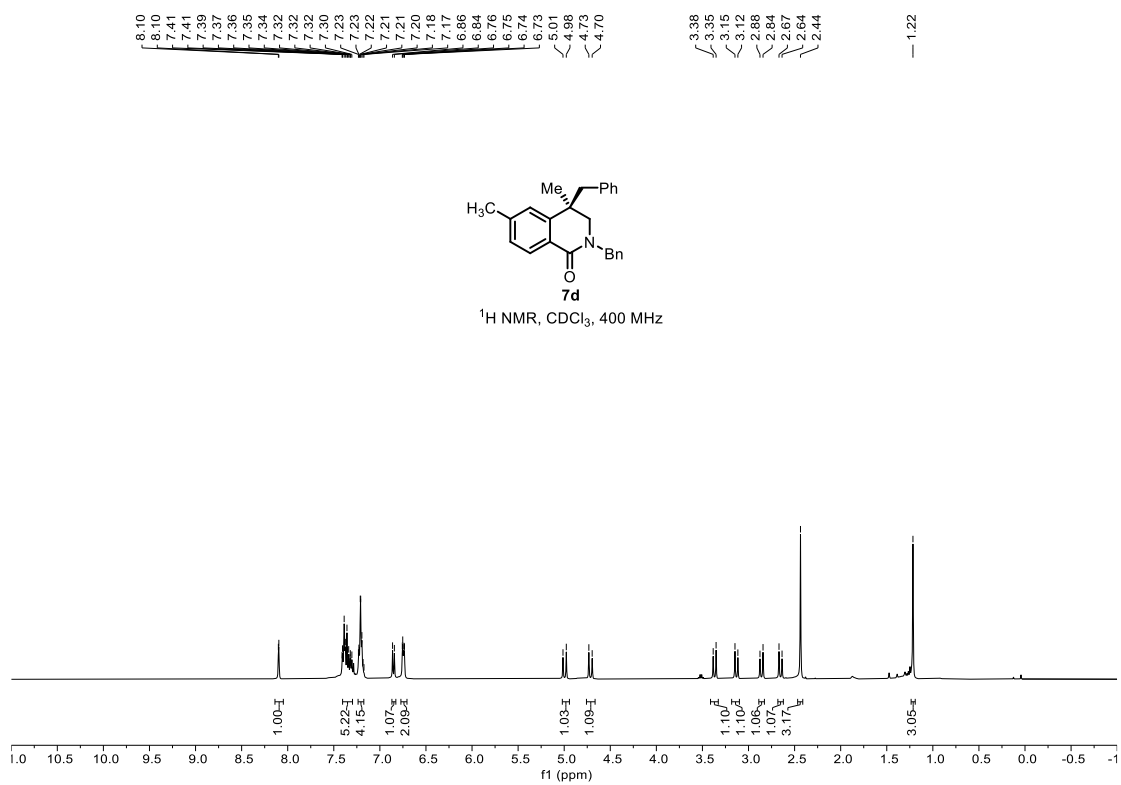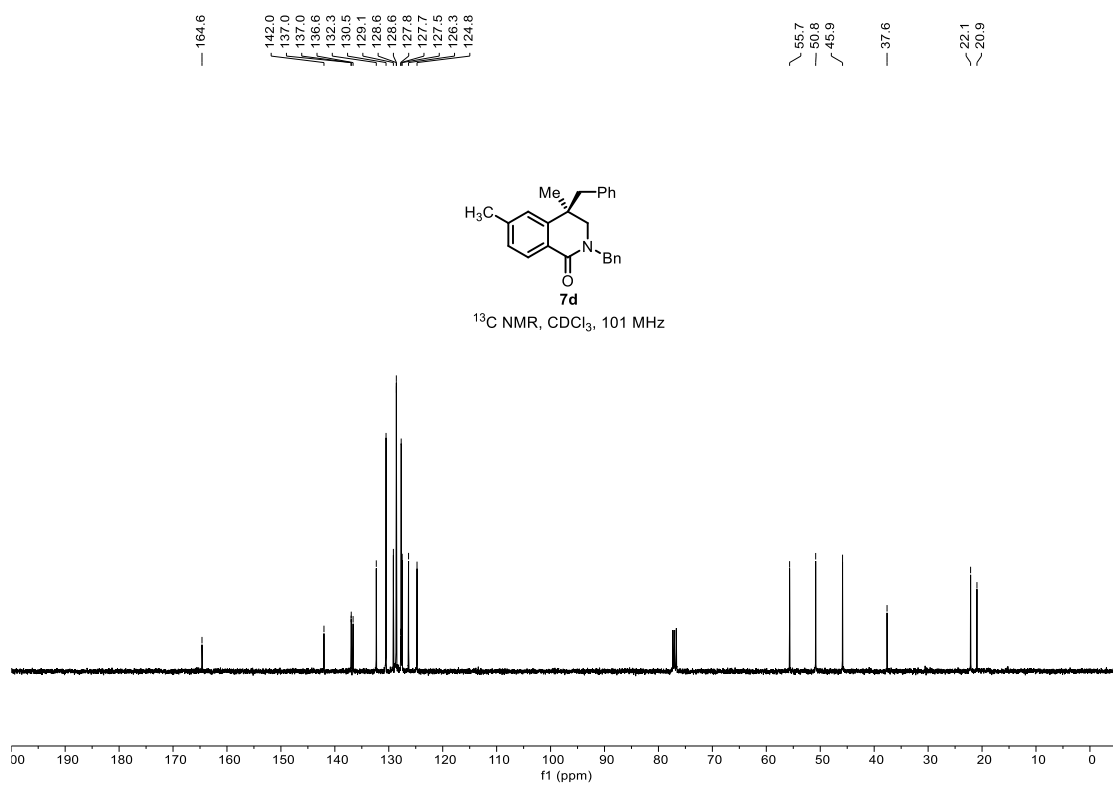



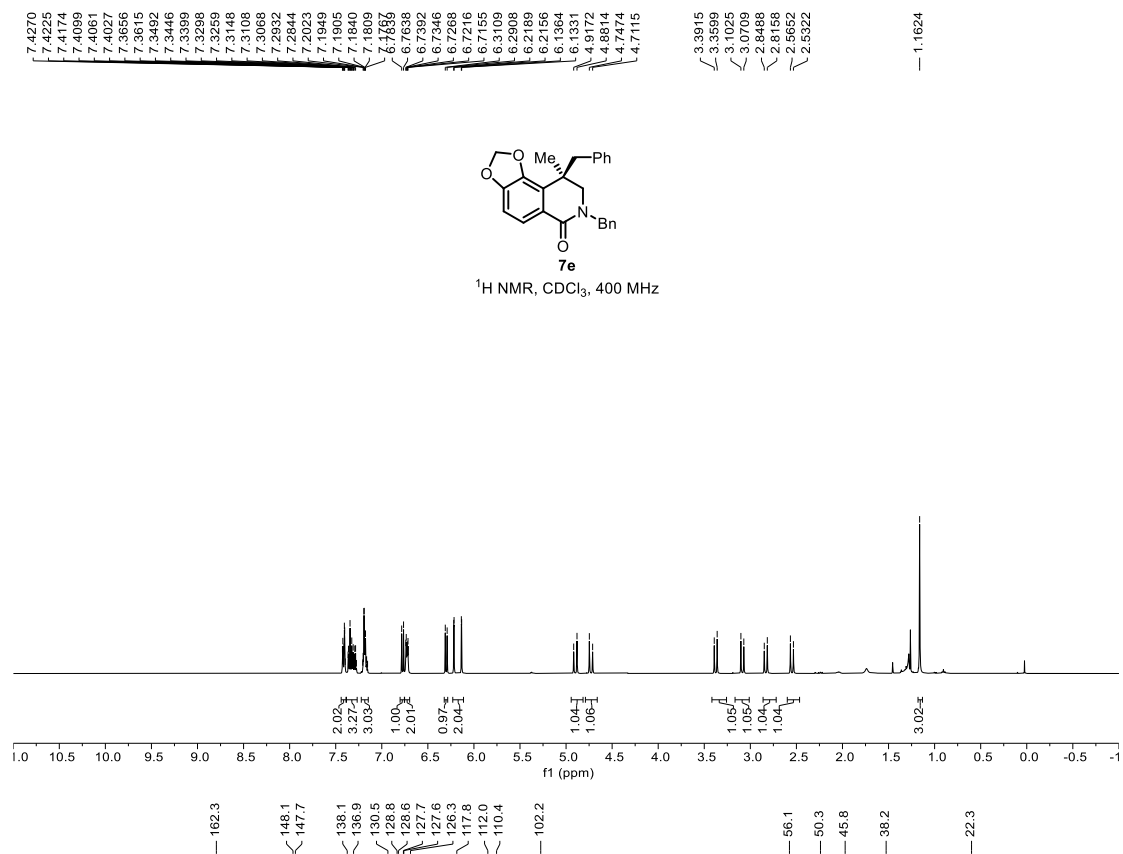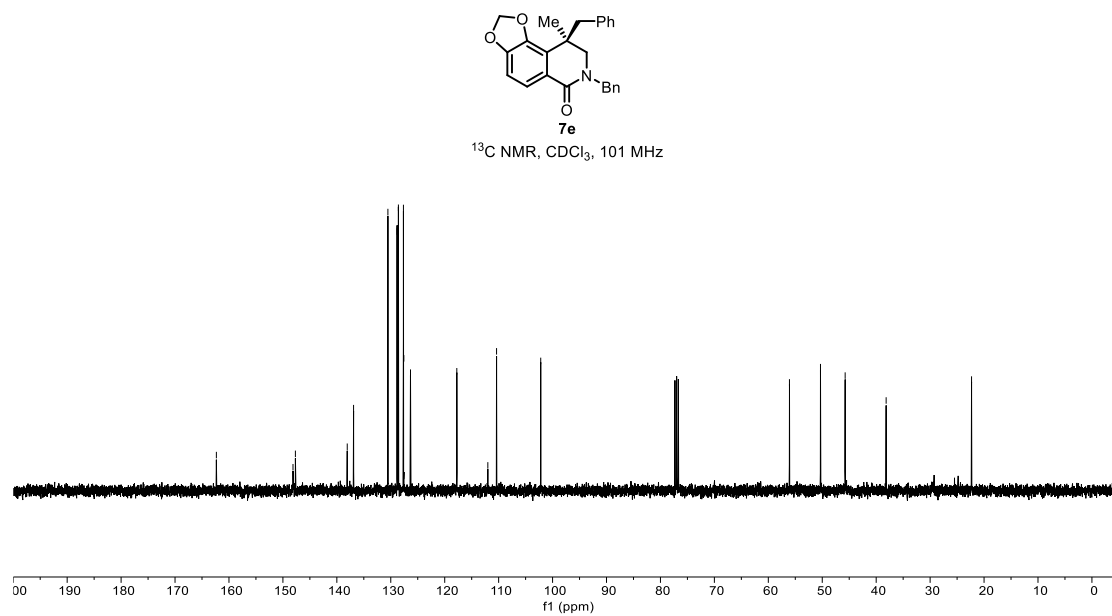

8.2434  
8.2376  
7.4001  
7.3942  
7.3883  
7.3784  
7.3737  
7.3633  
7.3609  
7.3555  
7.3485  
7.3426  
7.3337  
7.3279  
7.3217  
7.3146  
7.3114  
7.3031  
7.3008  
7.2969  
7.2951  
7.2842  
7.2262  
7.2226  
7.2170  
7.2140  
7.2102  
7.2076  
7.2036  
7.1970  
7.1933  
7.1915  
7.1840  
7.1791  
7.1745  
7.1705  
6.8398  
6.8190  
6.7287  
6.7211  
6.7170  
6.7127  
6.7078  
6.7041  
6.7027  
6.6976  
4.9519  
4.9159  
4.7523  
4.7163  
3.4069  
3.3752  
3.3586  
3.1281  
2.8672  
2.8341  
2.6220  
2.5889  
1.2189

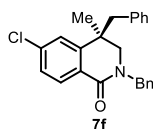

$^1\text{H}$  NMR,  $\text{CDCl}_3$ , 400 MHz

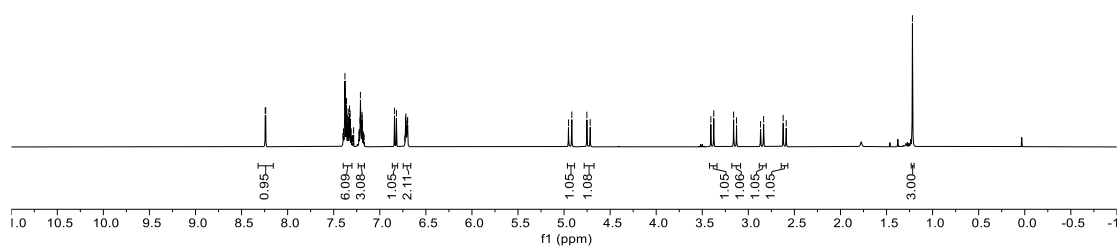

163.2  
143.1  
136.6  
133.2  
131.4  
130.5  
128.7  
128.7  
127.8  
127.7  
126.6  
126.6  
55.6  
50.9  
45.7  
37.8  
22.0

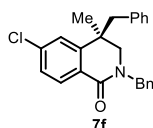

$^{13}\text{C}$  NMR,  $\text{CDCl}_3$ , 101 MHz

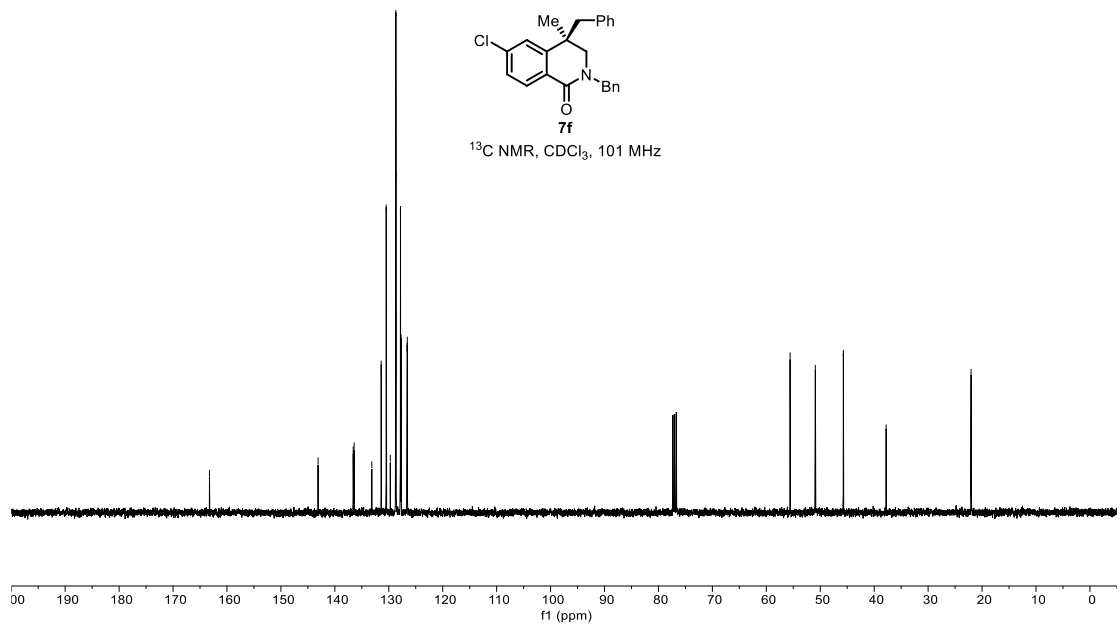

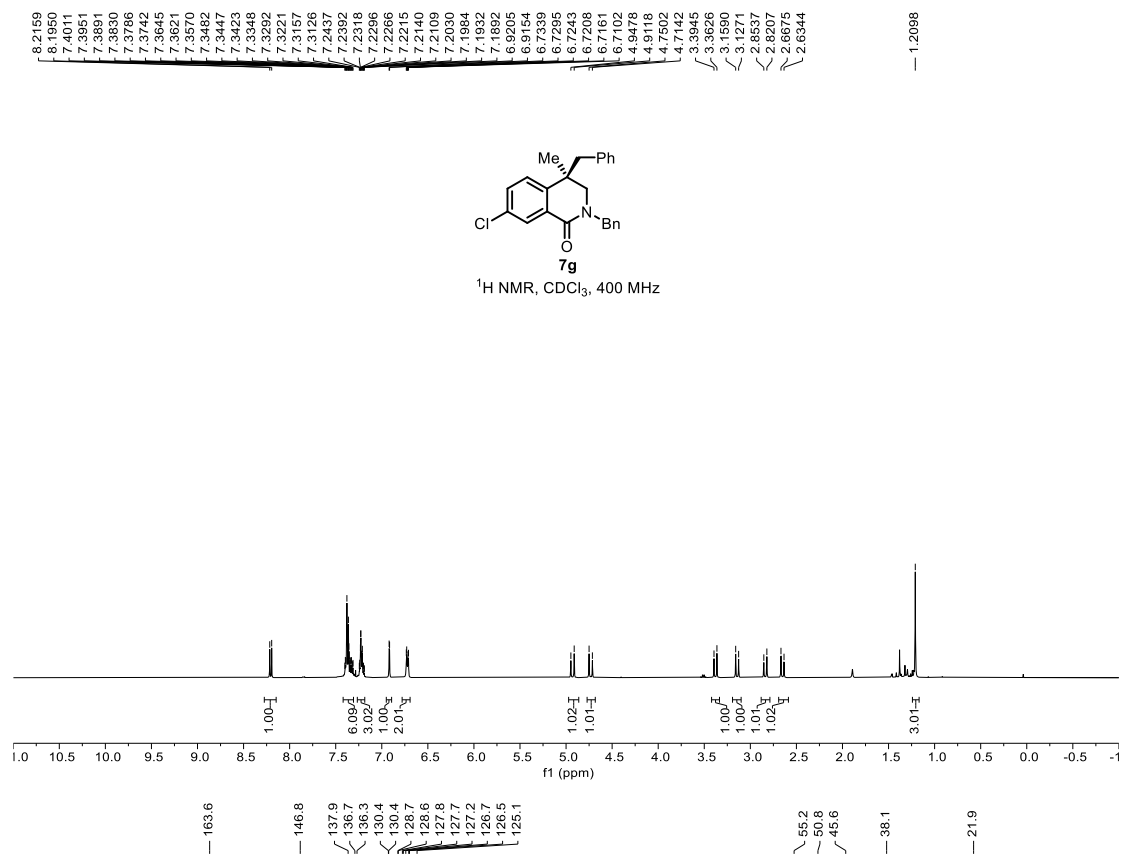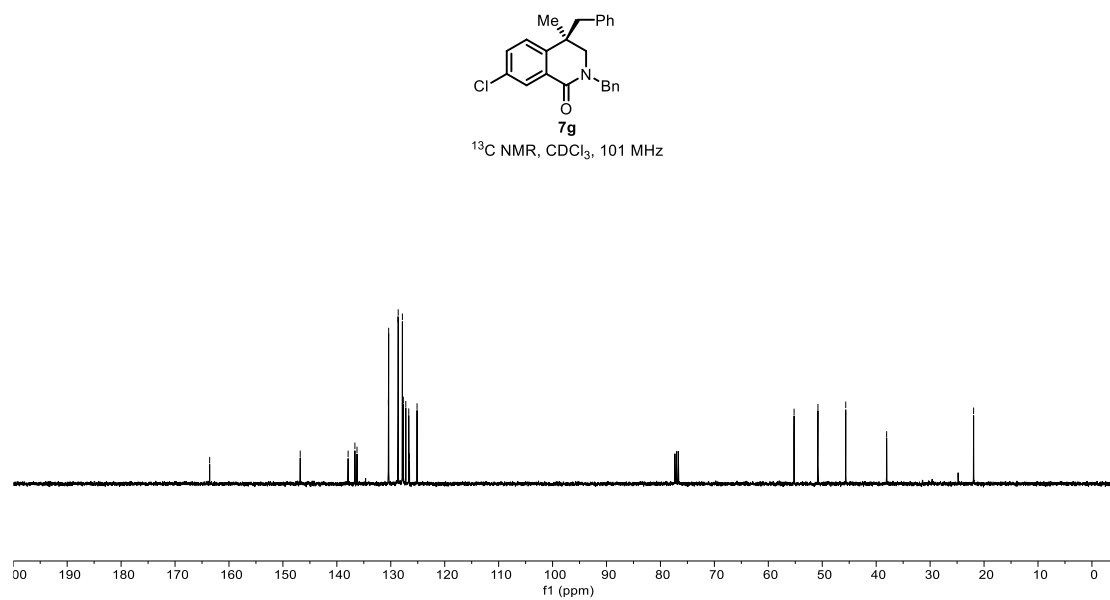

7.9614  
7.9541  
7.9380  
7.9308  
7.4073  
7.4019  
7.3962  
7.3862  
7.3829  
7.3808  
7.3750  
7.3686  
7.3663  
7.3638  
7.3590  
7.3534  
7.3494  
7.3463  
7.3444  
7.3398  
7.3347  
7.3286  
7.3242  
7.3200  
7.3150  
7.3125  
7.2193  
7.2160  
7.2095  
7.2067  
7.2022  
7.1972  
7.1928  
7.1883  
7.1847  
7.1828  
7.1786  
7.1763  
7.1741  
7.1698  
7.1660  
7.1620  
7.0888  
7.0816  
7.0679  
7.0606  
7.0470  
7.0396  
6.8844  
6.8516  
6.8426  
6.8301  
6.7066  
6.7026  
6.6981  
6.6929  
6.6881  
6.6828  
4.9376  
4.9082  
4.9016  
4.7789  
4.7430  
3.4255  
3.3938  
3.1671  
3.1353  
2.8709  
2.8380  
2.6094  
2.5764  
1.2270

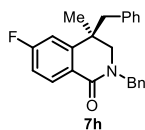

$^1\text{H}$  NMR,  $\text{CDCl}_3$ , 400 MHz

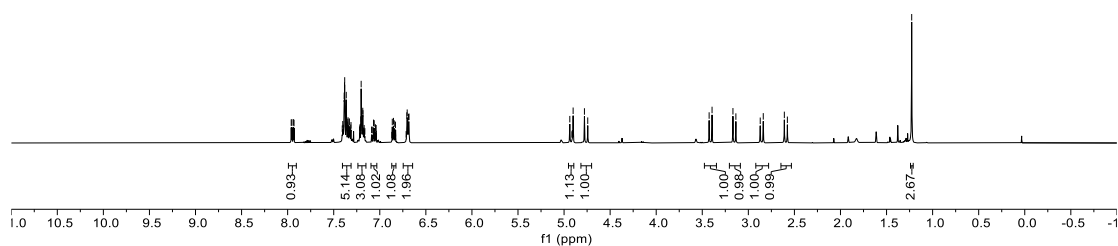

163.4  
162.9  
160.5

136.6  
136.5  
130.5  
128.8  
128.7  
128.7  
128.4  
127.8  
127.7  
127.3  
127.0  
126.9  
126.5  
118.5  
116.3  
115.4  
115.2

55.8  
50.9  
45.8

37.7

22.2

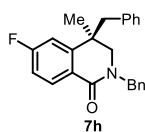

$^{13}\text{C}$  NMR,  $\text{CDCl}_3$ , 101 MHz

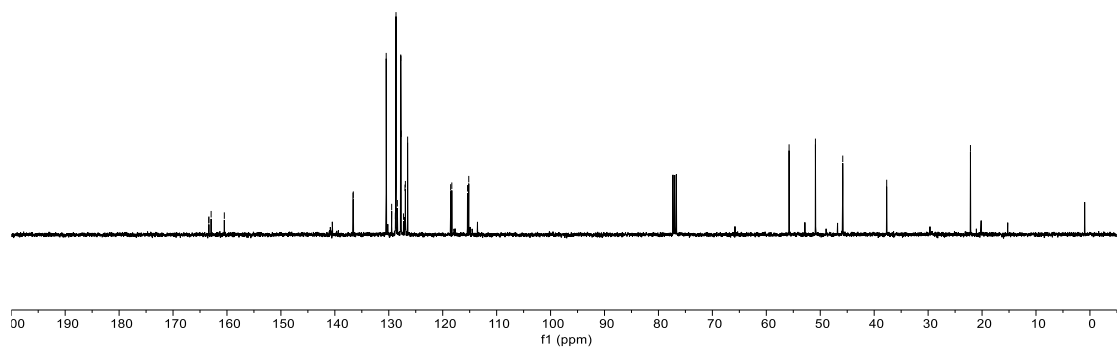

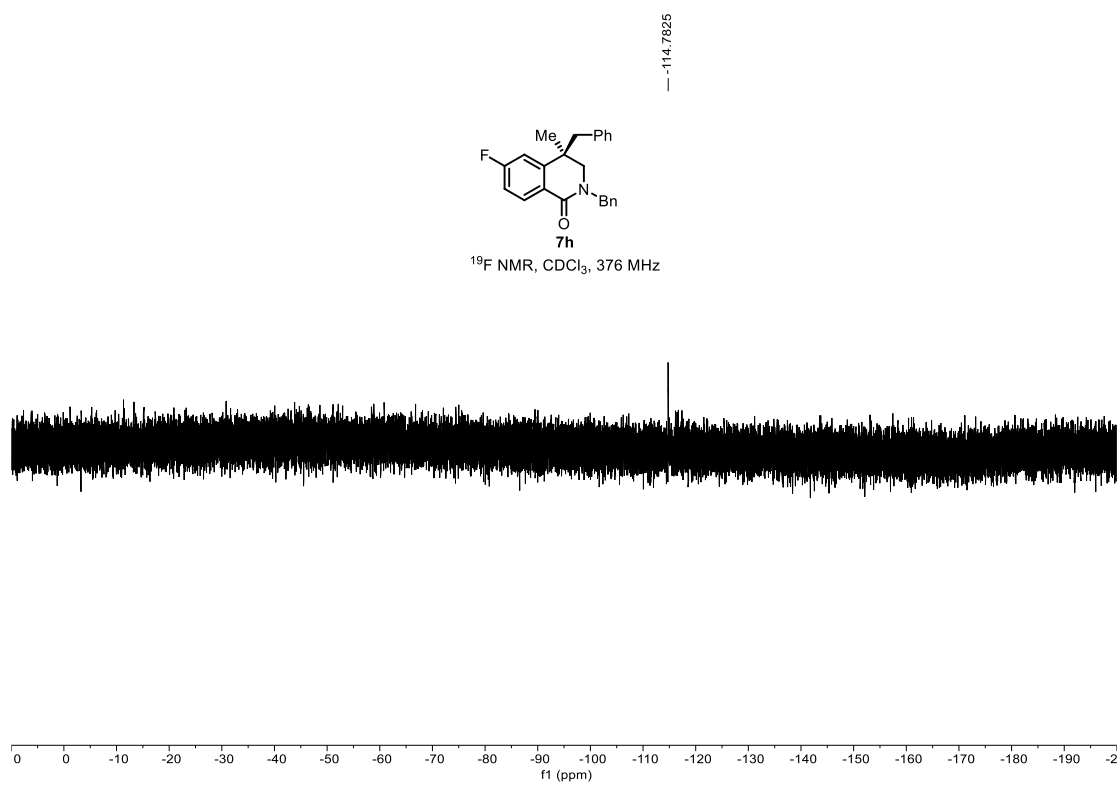

8.2773  
8.2734  
8.2579  
8.2540  
7.8306  
7.8272  
7.8100  
7.8066  
7.7246  
7.7040  
7.6311  
7.6097  
7.4279  
7.4248  
7.4214  
7.4075  
7.4043  
7.3880  
7.3849  
7.3694  
7.3664  
7.3586  
7.3556  
7.3509  
7.3392  
7.3348  
7.3310  
7.3170  
7.3123  
7.3078  
7.3040  
7.2937  
7.2896  
7.2849  
7.2797  
7.2745  
7.2679  
7.2478  
7.2104  
7.2059  
7.1995  
7.1967  
7.1921  
7.0285  
7.0254  
7.0091  
7.0059  
6.9718  
6.8686  
6.8542  
6.8512  
6.8276  
6.8230  
6.9152  
6.9099  
6.9037  
4.6082  
4.5721  
4.4850  
4.4491  
3.6993  
3.6628  
3.4593  
3.4273  
3.3893  
3.3571  
3.3145  
3.2780  
3.2376  
3.2027  
3.0568  
3.0219

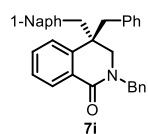

$^1\text{H}$  NMR,  $\text{CDCl}_3$ , 400 MHz

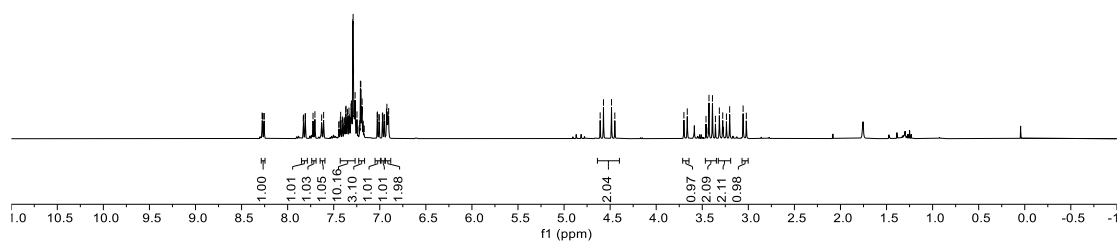

163.7  
142.3  
138.7  
133.6  
133.0  
132.8  
131.2  
130.6  
128.0  
128.7  
128.6  
128.3  
128.0  
127.5  
127.3  
127.0  
126.6  
126.2  
125.7  
125.2  
124.8  
123.5  
53.3  
50.6  
43.7  
42.6  
39.0

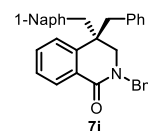

$^{13}\text{C}$  NMR,  $\text{CDCl}_3$ , 101 MHz

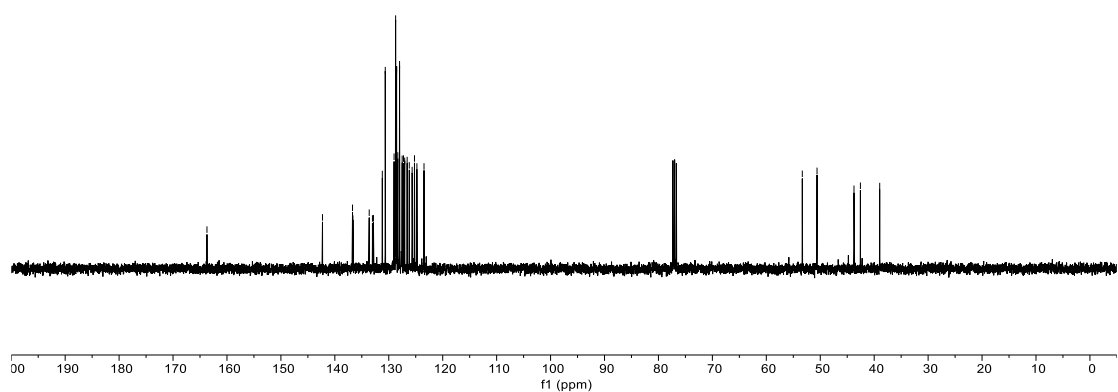

8.3219  
8.3161  
8.3062  
8.3030  
8.2987  
7.6046  
7.6008  
7.5958  
7.5867  
7.5832  
7.5804  
7.5751  
7.4810  
7.4756  
7.4623  
7.4579  
7.4523  
7.4460  
7.4422  
7.4380  
7.4341  
7.4286  
7.4249  
7.4169  
7.4086  
7.4041  
7.3988  
7.3859  
7.3824  
7.3681  
7.3618  
7.3542  
7.3489  
7.3469  
7.3404  
7.3364  
7.3339  
7.3303  
7.3240  
7.3187  
7.3118  
7.2309  
7.2264  
7.2186  
7.2143  
7.2065  
7.2004  
7.1820  
7.1861  
7.0859  
7.0861  
7.0531  
7.0424  
7.0373  
6.9541  
6.9493  
6.9383  
6.9337  
6.9029  
6.8984  
6.8934  
6.8904  
6.8853  
6.8790  
4.8004  
4.7644  
4.7339  
4.6978  
3.3864  
3.3826  
3.0305  
3.0232

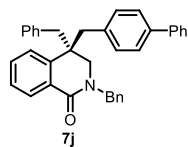

$^1\text{H}$  NMR,  $\text{CDCl}_3$ , 400 MHz

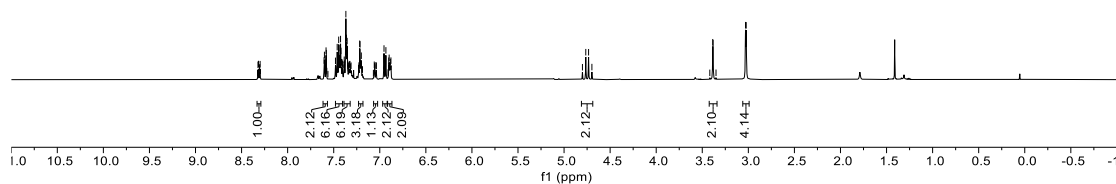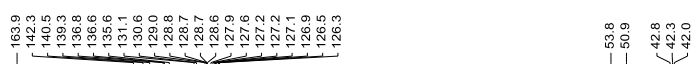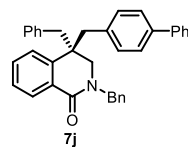

$^{13}\text{C}$  NMR,  $\text{CDCl}_3$ , 101 MHz

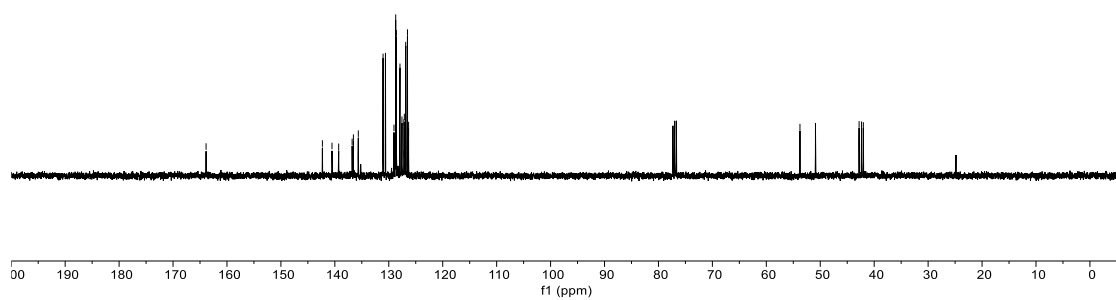

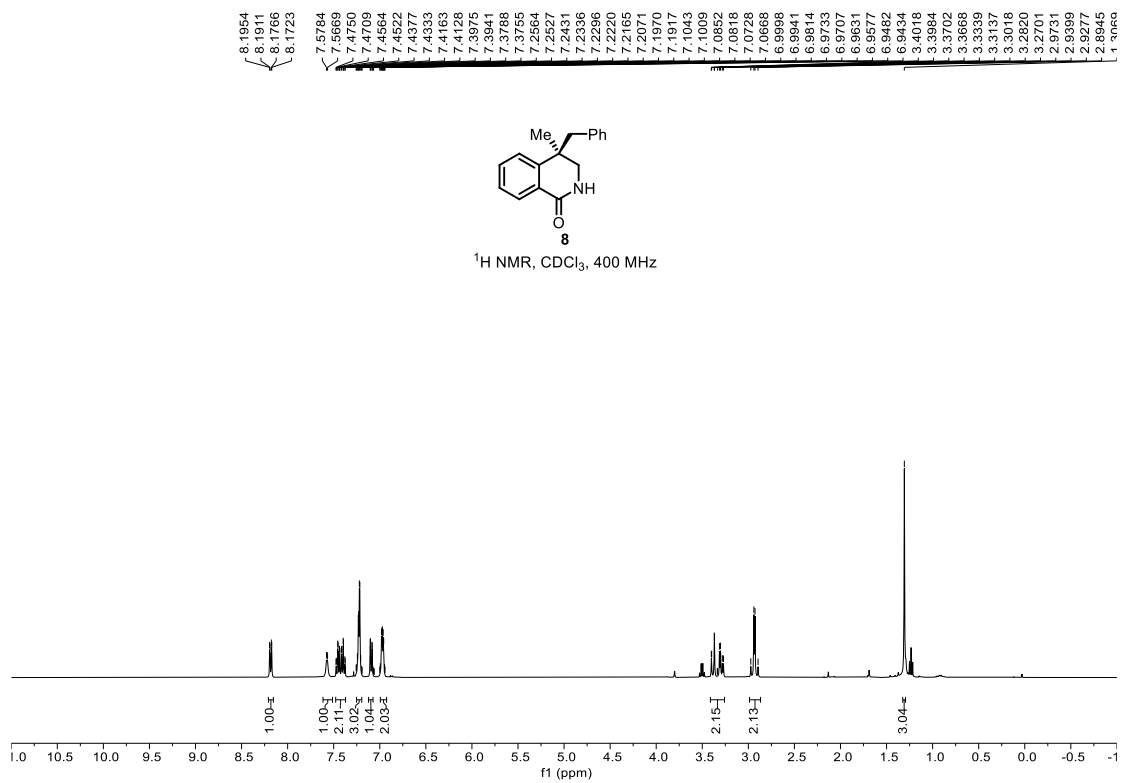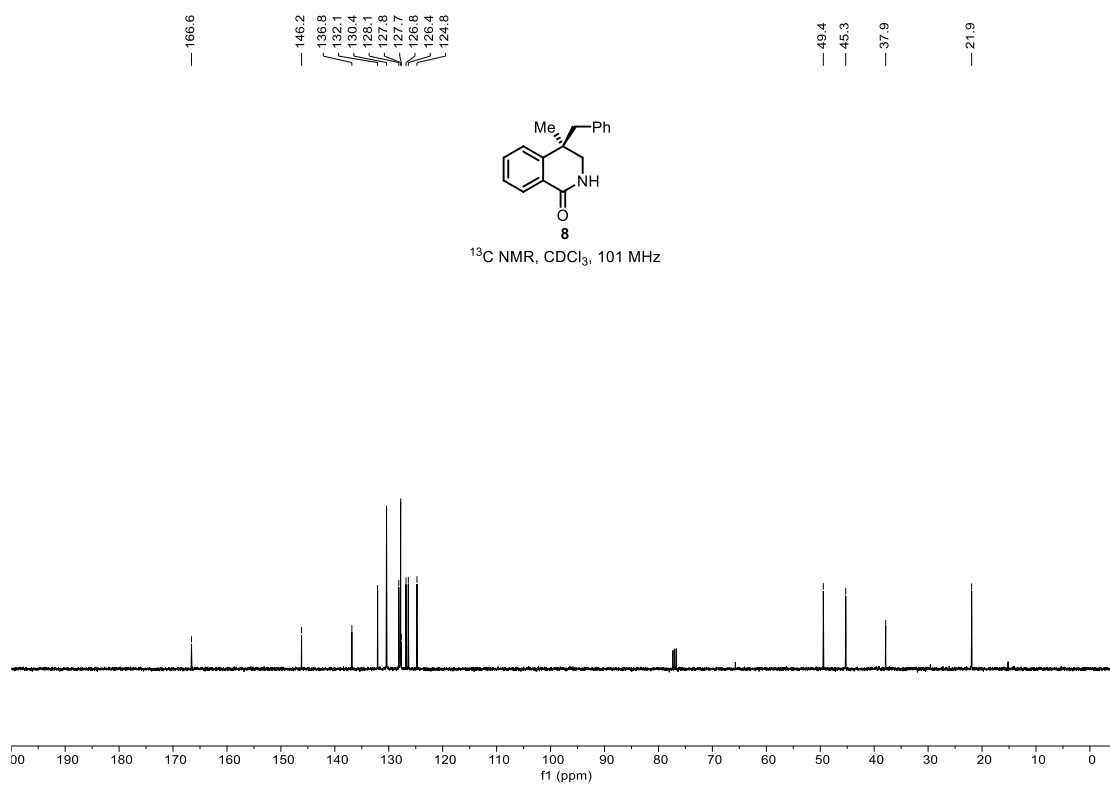



7.4381  
7.4307  
7.4260  
7.4144  
7.4091  
7.4017  
7.2841  
7.2804  
7.2652  
7.2612  
7.2541  
7.2483  
7.2445  
7.2402  
7.2367  
7.2335  
7.2285  
7.2189  
7.2151  
7.2006  
7.1964  
7.1897  
7.1855  
7.1713  
7.1673  
7.1533  
7.1494  
7.0730  
7.0597  
7.0567  
7.0550  
7.0415  
7.0376  
7.0326  
7.0287  
7.0260  
7.0220  
7.0187  
7.0165  
7.0125  
7.0086  
6.9981  
6.9935  
6.9862  
6.9816  
6.9698  
6.9688  
6.9646  
6.9571  
6.9466  
3.8766  
3.8686  
3.8671  
3.8761  
3.8734  
3.8709  
3.8705  
3.6765  
3.6658  
3.6444  
3.6327  
3.6008  
3.4903  
3.4537  
3.2248  
3.1923  
2.9064  
2.8740  
2.8240  
2.8201  
2.7950  
2.7911  
2.1650  
2.1362  
1.2142

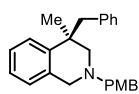

**9**  
 $^1\text{H}$  NMR,  $\text{CDCl}_3$ , 400 MHz

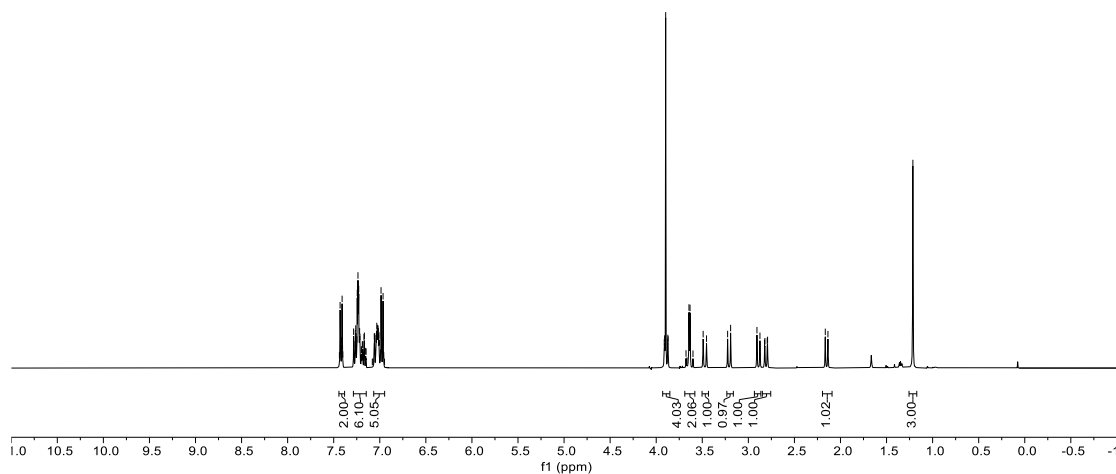

158.8  
143.3  
138.8  
134.4  
130.9  
130.6  
130.4  
127.6  
126.5  
126.3  
126.1  
125.8  
125.6  
113.7  
62.3  
60.6  
57.3  
55.3  
47.8  
39.3  
24.8

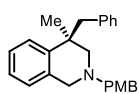

**9**  
 $^{13}\text{C}$  NMR,  $\text{CDCl}_3$ , 101 MHz

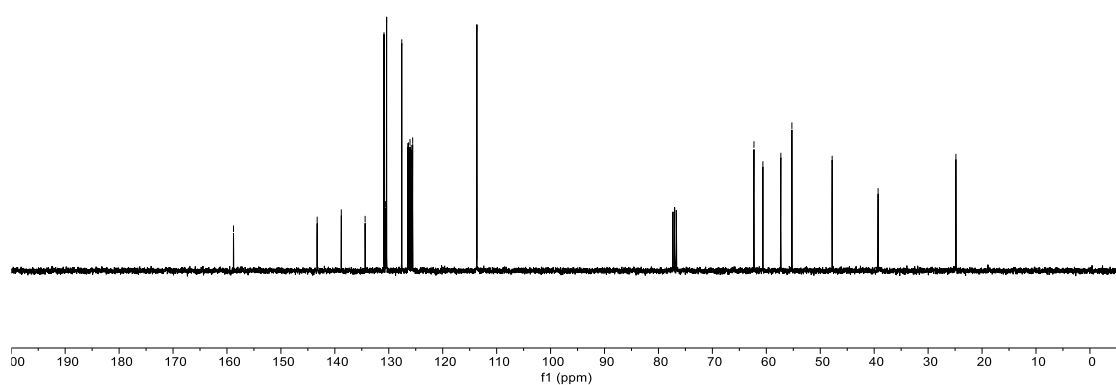

7.5902  
7.5860  
7.5813  
7.5765  
7.5702  
7.5642  
7.5605  
7.5566  
7.5094  
7.5048  
7.5009  
7.4968  
7.4917  
7.4843  
7.4795  
7.4745  
7.4648  
7.4605  
7.4535  
7.4484  
7.4453  
7.4413  
7.4354  
7.4384  
7.4324  
7.3419  
7.3376  
7.3324  
7.3267  
7.3228  
7.3183  
7.3138  
7.3060  
7.2985  
7.2941  
7.2895  
7.2834  
7.2779  
7.2703  
7.2507  
7.2366  
7.2226  
7.2183  
7.2139  
7.1101  
7.1026  
7.0979  
7.0933  
7.0887  
7.0846  
7.0799  
7.0737  
3.9384  
3.7852  
3.7776  
3.7731  
3.7409  
3.7331  
3.7285  
3.5616  
3.2739  
3.2687  
2.9842  
2.9790  
2.8859  
2.8571  
2.2672  
2.2627  
2.2383  
1.2904  
1.2819  
1.2769

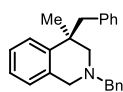

**10**  
 $^1\text{H}$  NMR,  $\text{CDCl}_3$ , 400 MHz

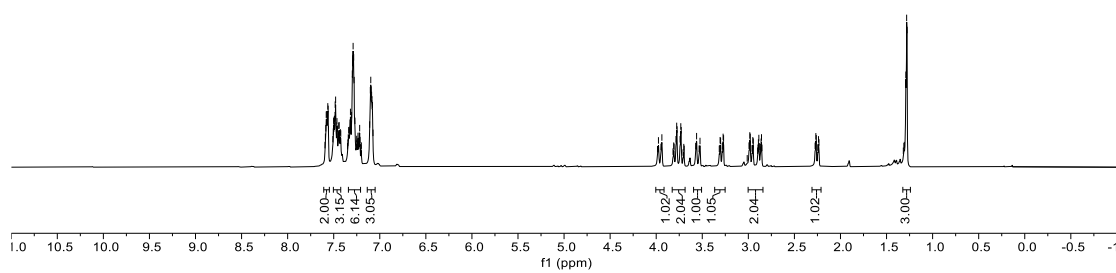

143.2  
139.6  
138.6  
134.3  
130.9  
129.2  
128.3  
127.6  
127.1  
126.5  
126.3  
126.1  
125.8  
125.6

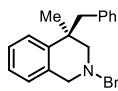

**10**  
 $^{13}\text{C}$  NMR,  $\text{CDCl}_3$ , 101 MHz

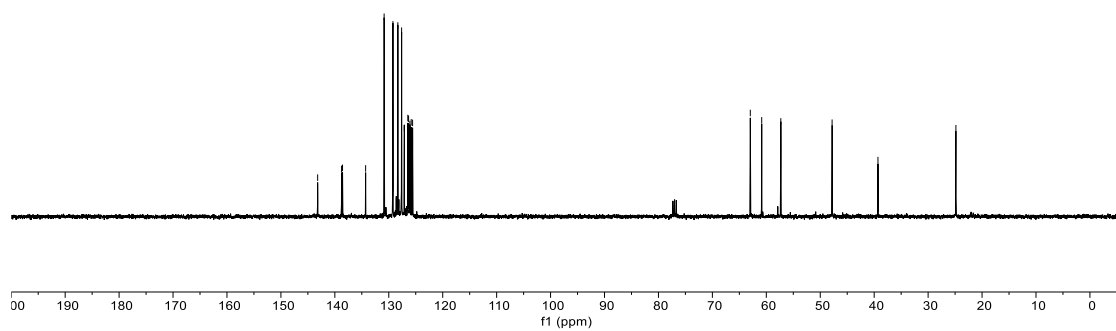

Supplement: Supplementary file 1 [file 27997548]
